# Supplementary material for: Asymmetric synthesis of aryl/vinyl alkyl carbinol estersviaNi-catalyzed reductive arylation/vinylation of 1-chloro-1-alkanol esters
Source: Royal Society of Chemistry journal article supplement (doi:10.1039/d2sc02806a), 2022-01-01

## Supporting Information

# **Asymmetric synthesis of aryl/vinyl alkyl carbinol esters via Ni-catalyzed reductive arylation/vinylation of 1-chloro-1-alkanol esters**

Deli Sun,<sup>a</sup> Xianghua Tao,<sup>b</sup> Guobin Ma,<sup>\*b</sup> Jifen Wang,<sup>\*a</sup> and Yunrong Chen<sup>\*b</sup>

<sup>a</sup>School of Resources and Environmental Engineering, Shanghai Polytechnic University, 2360 Jinhai Road, Shanghai 201209, P. R. China

<sup>b</sup>Center for Supramolecular Chemistry and Catalysis and Department of Chemistry, College of Sciences, Shanghai University, 99 Shangda Road, Shanghai 200444, P. R. China

### Table of Contents

|                                                               |      |
|---------------------------------------------------------------|------|
| I. Experimental Section                                       | S2   |
| Part 1. General information                                   | S2   |
| Part 2. Optimization Experiments                              | S2   |
| Part 3. Substrate Preparation                                 | S4   |
| Part 4. Cross-Coupling Reactions and Product Characterization | S10  |
| Part 5. Control Experiments and Other Possible Mechanism      | S48  |
| Part 6. Scale-Up Synthesis                                    | S50  |
| Part 7. One Pot Synthesis                                     | S51  |
| II. Reference                                                 | S52  |
| III. HPLC Traces                                              | S53  |
| IV. NMR Data                                                  | S120 |

## **I. Experimental Section**

### **Part 1. General Information**

Commercial reagents were purchased from Adamas, Aldrich, Bide, Energy Chemical, TCI and Leyan. Column chromatography was performed using silica gel 200-300 mesh (purchased from Qingdao-Haiyang Co., China) as the solid support. All NMR spectra were recorded on JEOL (400 MHz) spectrometers and Bruker Avance (600 MHz) spectrometer at STP. Data for  $^1\text{H}$  NMR spectra are reported as follows: chemical shift ( $\delta$  ppm), multiplicity, coupling constant (Hz) and integration. NMR spectra are internally referenced to residual proton solvent signals (note:  $\text{CDCl}_3$  referenced at 7.26 ppm for  $^1\text{H}$  NMR and 77.0 ppm for  $^{13}\text{C}$  NMR). Coupling constants were reported in Hz, and multiplicity was indicated as follows: s (singlet); d (doublet); t (triplet); q (quartet); quint (quintet); m (multiplet); dd (doublet of doublets); ddd (doublet of doublet of doublets); dt (doublet of triplets); td (triplet of doublets). High resolution mass spectra were measured on Bruker MicroTOF II ESI-TOF mass spectrometer, Agilent Technologies 6230 TOF LC/MS spectrometer in electrospray ionization ( $\text{ESI}^+$ ) mode or direct analysis in real time mode ( $\text{DART}^+$ ). Optical rotations were taken on JASCO P1030. Enantiomeric excesses were determined by chiral HPLC using a Shimadzu instrument using Daicel chiral columns. Melting point was recorded on a micro melting point apparatus (X-4, YUHUA Co., Ltd, Gongyi, China).

### **Part 2. Optimization Experiments**

**General procedure of optimization experiments:** To a flame-dried tube equipped with a stir bar was added the appropriate ligand (0.015 mmol, 10 mol%) and methyl 4-bromobenzoate (32.3 mg, 0.15 mmol, 1.0 equiv). The tube was transferred into a  $\text{N}_2$ -filled glovebox, Mn (24.7 mg, 0.45 mmol, 3.0 equiv),  $\text{NiBr}_2(\text{DME})$  (2.3 mg, 5 mol%) and additives were added. The tube was sealed, removed from the glovebox and charged with the solvent. The mixture was stirred at 800 rpm, ensuring that the reductant was uniformly suspended. After 5 min, 1-chloropropyl 4-methylbenzoate **1** (63.8 mg, 0.3 mmol, 2.0 equiv) was added to the tube with a syringe over 1 min. The mixture was stirred vigorously (800 rpm) at 30  $^\circ\text{C}$  for 40 h. After that, the mixture was loaded directly onto a silica gel column (eluted with 0–5% EtOAc/Petroleum ether) to give the target molecule, the yield was determined by  $^1\text{H}$  NMR, and the enantioselectivity was determined by HPLC analysis using Daicel Chiralcel columns.

**Table S1 Optimization of the reaction conditions** <sup>a,b</sup>

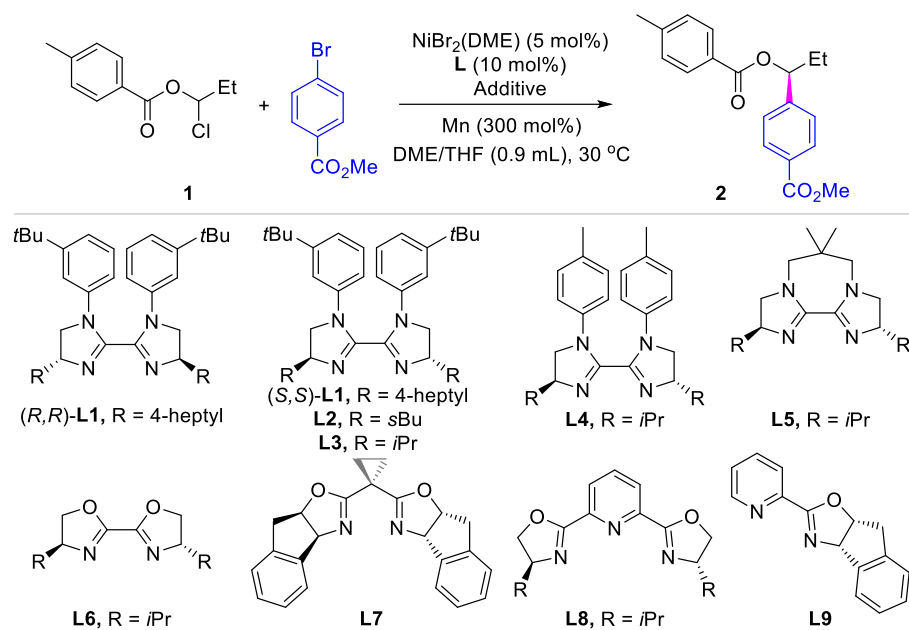

| Entry           | Ligand           | Solvent           | Additive (equiv.)     | Yield %              | e.e.% |
|-----------------|------------------|-------------------|-----------------------|----------------------|-------|
| 1               | <b>(R, R)-L1</b> | DME/THF (1/2)     | LiI (2.5) TBAI (0.5)  | 95 (92) <sup>c</sup> | 94    |
| 2               | <b>(S, S)-L1</b> | DME/THF (1/2)     | LiI (2.5) TBAI (0.5)  | 93                   | -94   |
| 3               | <b>L2</b>        | DME/THF (1/2)     | LiI (2.5) TBAI (0.5)  | 94                   | -90   |
| 4               | <b>L3</b>        | DME/THF (1/2)     | LiI (2.5) TBAI (0.5)  | 95                   | -89   |
| 5               | <b>L4</b>        | DME/THF (1/2)     | LiI (2.5) TBAI (0.5)  | 90                   | -87   |
| 6               | <b>L5</b>        | DME/THF (1/2)     | LiI (2.5) TBAI (0.5)  | 82                   | -62   |
| 7               | <b>L6</b>        | DME/THF (1/2)     | LiI (2.5) TBAI (0.5)  | 36                   | -54   |
| 8               | <b>L7</b>        | DME/THF (1/2)     | LiI (2.5) TBAI (0.5)  | 9                    | -17   |
| 9               | <b>L8</b>        | DME/THF (1/2)     | LiI (2.5) TBAI (0.5)  | 50                   | -56   |
| 10              | <b>L9</b>        | DME/THF (1/2)     | LiI (2.5) TBAI (0.5)  | 49                   | -6    |
| 11              | <b>L3</b>        | DME               | LiI (2.5) TBAI (0.5)  | 92                   | -81   |
| 12              | <b>L3</b>        | THF               | LiI (2.5) TBAI (0.5)  | 45                   | -89   |
| 13              | <b>L3</b>        | Acetone/THF (1/2) | LiI (2.5) TBAI (0.5)  | 56                   | -87   |
| 14              | <b>L3</b>        | DME/THF (2/1)     | LiI (2.5) TBAI (0.5)  | 96                   | -88   |
| 15              | <b>L3</b>        | DME/THF (1/9)     | LiI (2.5) TBAI (0.5)  | 81                   | -89   |
| 16              | <b>L3</b>        | DME/THF (1/2)     | LiI (2.5) TBAI (0.5)  | 93                   | -88   |
| 17              | <b>(R, R)-L1</b> | DME/THF (1/2)     | -                     | Trace                | -     |
| 18              | <b>(R, R)-L1</b> | DME/THF (1/2)     | LiI (2.5)             | 70                   | 93    |
| 19              | <b>(R, R)-L1</b> | DME/THF (1/2)     | TBAI (0.5)            | 20                   | 92    |
| 20              | <b>(R, R)-L1</b> | DME/THF (1/2)     | LiI (2.5) TEAI (0.5)  | 65                   | 92    |
| 21              | <b>(R, R)-L1</b> | DME/THF (1/2)     | LiI (2.5) TBAC (0.5)  | 62                   | 92    |
| 22              | <b>(R, R)-L1</b> | DME/THF (1/2)     | LiI (2.5) TBAB (0.5)  | 85                   | 92    |
| 23              | <b>(R, R)-L1</b> | DME/THF (1/2)     | LiCl (2.5) TBAC (0.5) | 7                    | -     |
| 24 <sup>d</sup> | <b>(R, R)-L1</b> | DME/THF (1/2)     | LiI (2.5) TBAI (0.5)  | 66                   | 92    |

[a] Reactions conducted under N<sub>2</sub> on 0.15 mmol scale for 40 h, ee was determined by chiral HPLC analysis [b] NMR yield using 2,5-dimethyl furan as the internal standard. [c] Isolated yield. [d] Zn instead of Mn.

### Part 3. Substrate Preparation

#### a. General procedure for preparation of 1-chloro-1-alkanol esters (GP A).

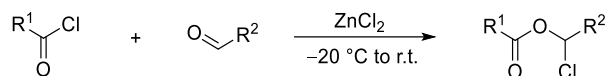

The 1-chloro-1-alkanol esters were prepared according to the literature reported.<sup>1,2</sup> To a round-bottom flask equipped with a stir bar was charged with ZnCl<sub>2</sub> (10 mol%). The flask was placed under a nitrogen atmosphere by evacuating and backfilling the flask (three cycles), followed by the addition of DCM and acyl chloride (0.5 M, 1.0 equiv), then the resulting solution was cooled to -20 °C and stirred for 5 min. After that, the aldehyde (1 M in DCM, 1.0 equiv) was added dropwise to the above mixture over 20 min. The reaction mixture was stirred for 2-12 hours at r.t., then quenched with NaHCO<sub>3</sub> (5% aq), extracted with DCM. The organic phase were collected, dried over MgSO<sub>4</sub>, concentrated under reduced pressure. The crude material was purified by flash column chromatography on silica gel to give desire compound (isolated yield: ~50%).

#### 1-Chloropropyl 4-methylbenzoate (1)

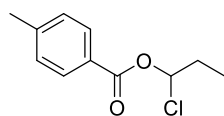

**1** was prepared by *GPA* as a colorless oil.

**<sup>1</sup>H NMR (600 MHz, CDCl<sub>3</sub>)** δ 8.00 – 7.91 (m, 2H), 7.32 – 7.18 (m, 2H), 6.64 (t, *J* = 5.6 Hz, 1H), 2.42 (s, 3H), 2.21 – 2.14 (m, 2H), 1.13 (t, *J* = 7.4 Hz, 3H).

**<sup>13</sup>C NMR (151 MHz, CDCl<sub>3</sub>)** δ 164.3, 144.7, 130.0, 129.2, 126.2, 85.7, 31.6, 21.7, 9.2.

**HRMS** (ESI) calculated for: C<sub>11</sub>H<sub>14</sub>ClO<sub>2</sub><sup>+</sup> ([M+H]<sup>+</sup>) *m/z* 213.0677, found 213.0662.

#### 1-Chloropropyl 2-methylbenzoate (SM1)

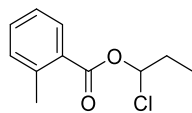

**SM1** was prepared by *GPA* as a colorless oil.

**<sup>1</sup>H NMR (600 MHz, CDCl<sub>3</sub>)** δ 7.97 (dd, *J* = 8.1, 1.5 Hz, 1H), 7.45 (td, *J* = 7.5, 1.5 Hz, 1H), 7.31 – 7.21 (m, 2H), 6.64 (t, *J* = 5.6 Hz, 1H), 2.64 (s, 3H), 2.21 – 2.14 (m, 2H), 1.14 (t, *J* = 7.4 Hz, 3H).

**<sup>13</sup>C NMR (151 MHz, CDCl<sub>3</sub>)** δ 164.9, 141.2, 132.8, 131.9, 130.9, 128.0, 125.8, 85.6, 31.6, 21.8, 9.2.

**HRMS** (ESI) calculated for: C<sub>11</sub>H<sub>14</sub>ClO<sub>2</sub><sup>+</sup> ([M+H]<sup>+</sup>) *m/z* 213.0677, found 213.0662.

### 1-Chloropropyl 3,5-dimethylbenzoate (SM2)

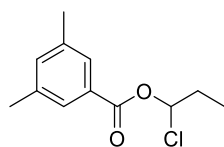

SM2 was prepared by *GPA* as a colorless oil.

**$^1\text{H NMR}$  (600 MHz,  $\text{CDCl}_3$ )**  $\delta$  7.69 (d,  $J = 1.6$  Hz, 2H), 7.25 – 7.22 (m, 1H), 6.64 (t,  $J = 5.7$  Hz, 1H), 2.37 (d,  $J = 0.9$  Hz, 6H), 2.22 – 2.15 (m, 2H), 1.14 (t,  $J = 7.4$  Hz, 3H).

**$^{13}\text{C NMR}$  (151 MHz,  $\text{CDCl}_3$ )**  $\delta$  164.6, 138.2, 135.4, 128.8, 127.6, 85.7, 31.6, 21.1, 9.3.

**HRMS** (ESI) calculated for:  $\text{C}_{12}\text{H}_{16}\text{ClO}_2^+$  ( $[\text{M}+\text{H}]^+$ )  $m/z$  227.0834, found 227.0842.

### 1-Chloropropyl 4-fluorobenzoate (SM3)

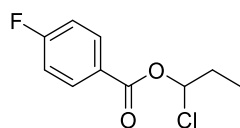

SM3 was prepared by *GPA* as a colorless oil.

**$^1\text{H NMR}$  (600 MHz,  $\text{CDCl}_3$ )**  $\delta$  8.12 – 8.07 (m, 2H), 7.17 – 7.11 (m, 2H), 6.62 (t,  $J = 5.7$  Hz, 1H), 2.21 – 2.14 (m, 2H), 1.13 (t,  $J = 7.4$  Hz, 3H).

**$^{13}\text{C NMR}$  (151 MHz,  $\text{CDCl}_3$ )**  $\delta$  166.2 (d,  $J = 255.4$  Hz), 163.3, 132.6 (d,  $J = 9.5$  Hz), 125.2 (d,  $J = 3.1$  Hz), 115.8 (d,  $J = 22.1$  Hz), 85.7, 31.6, 9.2.

**$^{19}\text{F NMR}$  (565 MHz,  $\text{CDCl}_3$ )**  $\delta$  -103.18.

**HRMS** (ESI) calculated for:  $\text{C}_{10}\text{H}_{10}\text{ClFO}_2^+$   $[\text{M}]^+$   $m/z$  216.0348, found 216.0341.

### 1-Chloropropyl 4-(*tert*-butyl)benzoate (SM4)

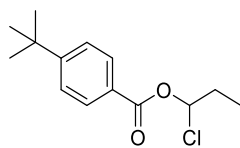

SM4 was prepared by *GPA* as a colorless oil.

**$^1\text{H NMR}$  (600 MHz,  $\text{CDCl}_3$ )**  $\delta$  8.03 – 7.99 (m, 2H), 7.51 – 7.46 (m, 2H), 6.64 (t,  $J = 5.7$  Hz, 1H), 2.22 – 2.14 (m, 2H), 1.34 (s, 9H), 1.13 (t,  $J = 7.4$  Hz, 3H).

**$^{13}\text{C NMR}$  (151 MHz,  $\text{CDCl}_3$ )**  $\delta$  164.3, 157.6, 129.9, 126.1, 125.5, 85.6, 35.2, 31.6, 31.0, 9.2.

**HRMS** (ESI) calculated for:  $\text{C}_{14}\text{H}_{19}\text{ClNaO}_2^+$  ( $[\text{M}+\text{Na}]^+$ )  $m/z$  277.0966, found 277.0982.

### 1-Chloropropyl 2-naphthoate (SM5)

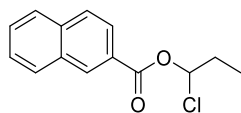

SM5 was prepared by *GPA* as a yellow oil.

**<sup>1</sup>H NMR (600 MHz, CDCl<sub>3</sub>)** δ 8.65 (t, *J* = 1.1 Hz, 1H), 8.08 (dd, *J* = 8.6, 1.8 Hz, 1H), 7.97 (dd, *J* = 8.2, 1.2 Hz, 1H), 7.92 – 7.87 (m, 2H), 7.63 – 7.55 (m, 2H), 6.72 (t, *J* = 5.7 Hz, 1H), 2.29 – 2.21 (m 2H), 1.19 (t, *J* = 7.4 Hz, 3H).

**<sup>13</sup>C NMR (151 MHz, CDCl<sub>3</sub>)** δ 164.5, 135.8, 132.3, 131.8, 129.4, 128.7, 128.4, 127.8, 126.8, 126.1, 125.1, 85.9, 31.7, 9.3.

**HRMS** (ESI) calculated for: C<sub>14</sub>H<sub>14</sub>ClO<sub>2</sub><sup>+</sup> ([M+H]<sup>+</sup>) *m/z* 249.0677, found 249.0662.

#### 1-Chloroethyl 4-methylbenzoate (SM6)

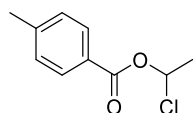

SM6 was prepared by *GPA* as a colorless oil.

**<sup>1</sup>H NMR (600 MHz, CDCl<sub>3</sub>)** δ 8.00 – 7.93 (m, 2H), 7.29 – 7.23 (m, 2H), 6.79 (q, *J* = 5.8 Hz, 1H), 2.42 (s, 3H), 1.92 (d, *J* = 5.8 Hz, 3H).

**<sup>13</sup>C NMR (151 MHz, CDCl<sub>3</sub>)** δ 164.2, 144.7, 130.0, 129.2, 126.1, 81.2, 25.3, 21.7.

**HRMS** (ESI) calculated for: C<sub>10</sub>H<sub>12</sub>ClO<sub>2</sub><sup>+</sup> ([M+H]<sup>+</sup>) *m/z* 199.0521, found 199.0549.

#### 1-Chlorobutyl 4-methylbenzoate (SM7)

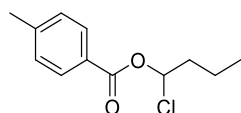

SM7 was prepared by *GPA* as a colorless oil.

**<sup>1</sup>H NMR (600 MHz, CDCl<sub>3</sub>)** δ 7.96 (d, *J* = 8.0 Hz, 2H), 7.26 (d, *J* = 7.9 Hz, 2H), 6.69 (t, *J* = 5.9 Hz, 1H), 2.42 (s, 3H), 2.24 – 2.08 (m, 2H), 1.62 – 1.56 (m, 2H), 1.00 (t, *J* = 7.5 Hz, 3H).

**<sup>13</sup>C NMR (151 MHz, CDCl<sub>3</sub>)** δ 164.4, 144.6, 130.0, 129.2, 126.2, 84.4, 40.3, 21.7, 18.3, 13.4.

**HRMS** (ESI) calculated for: C<sub>12</sub>H<sub>16</sub>ClO<sub>2</sub><sup>+</sup> ([M+H]<sup>+</sup>) *m/z* 227.0834, found 227.0835.

#### 1-Chlorohexyl 4-methylbenzoate (SM8)

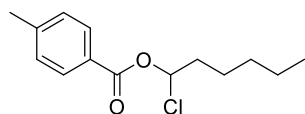

SM8 was prepared by *GPA* as a colorless oil.

**<sup>1</sup>H NMR (600 MHz, CDCl<sub>3</sub>)** δ 7.96 (d, *J* = 8.2 Hz, 2H), 7.26 (d, *J* = 8.2 Hz, 2H), 6.67 (t, *J* = 5.9 Hz, 1H), 2.42 (s, 3H), 2.15 (dtd, *J* = 11.3, 7.6, 5.9 Hz, 2H), 1.59 – 1.52 (m, 2H), 1.39 – 1.30 (m, 4H), 0.95 – 0.84 (m, 3H).

**<sup>13</sup>C NMR (151 MHz, CDCl<sub>3</sub>)** δ 164.4, 144.6, 130.0, 129.2, 126.2, 84.7, 38.3, 31.0, 24.6, 22.4, 21.7, 13.9.

**HRMS** (ESI) calculated for: C<sub>14</sub>H<sub>19</sub>ClNaO<sub>2</sub><sup>+</sup> ([M+Na]<sup>+</sup>) *m/z* 277.0966, found 277.0947.

#### 1-Chloroheptyl 4-methylbenzoate (SM9)

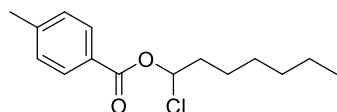

SM9 was prepared by *GPA* as a white oil.

**<sup>1</sup>H NMR (600 MHz, CDCl<sub>3</sub>)** δ 7.96 (d, *J* = 8.2 Hz, 2H), 7.26 (d, *J* = 8.1 Hz, 2H), 6.67 (t, *J* = 5.9 Hz, 1H), 2.42 (s, 3H), 2.19 – 2.11 (m, 2H), 1.57 – 1.51 (m, 2H), 1.42 – 1.35 (m, 2H), 1.34 – 1.26 (m, 4H), 0.92 – 0.86 (m, 3H).

**<sup>13</sup>C NMR (151 MHz, CDCl<sub>3</sub>)** δ 164.37, 144.7, 130.0, 129.2, 126.2, 84.7, 38.3, 31.6, 28.5, 24.85, 22.5, 21.7, 14.0.

**HRMS** (ESI) calculated for: C<sub>15</sub>H<sub>21</sub>ClNaO<sub>2</sub><sup>+</sup> ([M+Na]<sup>+</sup>) *m/z* 291.1123, found 291.1106.

#### 1-Chlorododecyl 4-methylbenzoate (SM10)

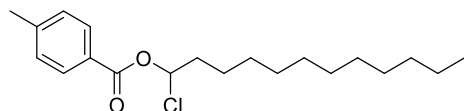

SM10 was prepared by *GPA* as a colorless oil.

**<sup>1</sup>H NMR (600 MHz, CDCl<sub>3</sub>)** δ 8.03 – 7.90 (m, 2H), 7.26 (d, *J* = 8.0 Hz, 2H), 6.67 (t, *J* = 5.9 Hz, 1H), 2.42 (s, 3H), 2.22 – 2.04 (m, 2H), 1.58 – 1.50 (m, 2H), 1.40 – 1.21 (m, 16H), 0.88 (t, *J* = 7.0 Hz, 3H).

**<sup>13</sup>C NMR (151 MHz, CDCl<sub>3</sub>)** δ 164.4, 144.6, 130.0, 129.2, 126.2, 84.7, 38.3, 31.9, 29.6, 29.5, 29.4, 29.3, 28.9, 24.9, 22.7, 21.7, 14.1.

**HRMS** (ESI) calculated for: C<sub>20</sub>H<sub>31</sub>ClNaO<sub>2</sub><sup>+</sup> ([M+Na]<sup>+</sup>) *m/z* 361.1905, found 361.1889.

#### 1-Chloro-3-methylbutyl 4-methylbenzoate (SM11)

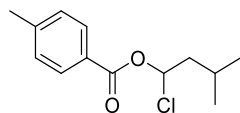

SM11 was prepared by *GPA* as a colorless oil.

**<sup>1</sup>H NMR (600 MHz, CDCl<sub>3</sub>)** δ 8.00 – 7.93 (m, 2H), 7.30 – 7.23 (m, 2H), 6.74 (dd, *J* = 7.2, 5.8 Hz, 1H),

2.42 (s, 3H), 2.12 (dt,  $J = 14.1, 7.0$  Hz, 1H), 2.05 – 2.01 (m, 5.8 Hz, 1H), 1.93 – 1.89 (m, 1H), 0.99 (t,  $J = 6.4$  Hz, 6H).

**$^{13}\text{C}$  NMR (151 MHz,  $\text{CDCl}_3$ )**  $\delta$  164.4, 144.7, 130.0, 129.3, 126.2, 83.7, 47.0, 25.1, 22.3, 22.2, 21.7.

**HRMS** (ESI) calculated for:  $\text{C}_{13}\text{H}_{17}\text{ClNaO}_2^+$  ( $[\text{M}+\text{Na}]^+$ )  $m/z$  263.0809, found 263.0784.

#### 1-Chloro-3-phenylpropyl 4-methylbenzoate (SM12)

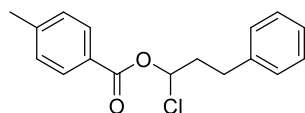

SM12 was prepared by *GP A* as a colorless oil.

**$^1\text{H}$  NMR (600 MHz,  $\text{CDCl}_3$ )**  $\delta$  7.96 – 7.90 (m, 2H), 7.34 – 7.30 (m, 2H), 7.27 (d,  $J = 8.7$  Hz, 2H), 7.24 – 7.20 (m, 3H), 6.66 (t,  $J = 5.8$  Hz, 1H), 2.93 – 2.88 (m, 2H), 2.55 – 2.46 (m, 2H), 2.43 (s, 3H).

**$^{13}\text{C}$  NMR (151 MHz,  $\text{CDCl}_3$ )**  $\delta$  164.2, 144.7, 140.0, 130.0, 129.3, 128.6, 128.4, 126.3, 126.0, 84.0, 39.7, 31.1, 21.7.

**HRMS** (ESI) calculated for:  $\text{C}_{17}\text{H}_{18}\text{ClO}_2^+$   $m/z$  ( $[\text{M}+\text{H}]^+$ ) 289.0990, found 289.0991.

#### 1-Chloro-3,3-dimethylbutyl 4-methylbenzoate (SM13)

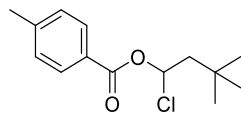

SM13 was prepared by *GP A* as a colorless oil.

**$^1\text{H}$  NMR (600 MHz,  $\text{CDCl}_3$ )**  $\delta$  8.02 – 7.93 (m, 2H), 7.29 – 7.23 (m, 2H), 6.82 (dd,  $J = 9.1, 2.9$  Hz, 1H), 2.42 (s, 3H), 2.33 (dd,  $J = 14.7, 9.1$  Hz, 1H), 2.08 (dd,  $J = 14.7, 2.9$  Hz, 1H), 0.99 (s, 9H).

**$^{13}\text{C}$  NMR (151 MHz,  $\text{CDCl}_3$ )**  $\delta$  164.2, 144.7, 130.1, 129.3, 126.1, 82.9, 51.8, 30.8, 29.7, 21.7.

**HRMS** (ESI) calculated for:  $\text{C}_{14}\text{H}_{19}\text{O}_2^+$  ( $[\text{M}-\text{Cl}]^+$ )  $m/z$  219.1380, found 219.1379.

#### 3-(Benzoyloxy)-1-chloropropyl 4-methylbenzoate (SM14)

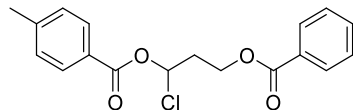

SM14 was prepared by *GP A* as a white oil.

**$^1\text{H}$  NMR (600 MHz,  $\text{CDCl}_3$ )**  $\delta$  8.02 (dd,  $J = 8.3, 1.4$  Hz, 2H), 7.97 – 7.92 (m, 2H), 7.59 – 7.54 (m, 1H), 7.43 (t,  $J = 7.8$  Hz, 2H), 7.23 (d,  $J = 8.0$  Hz, 2H), 6.90 (t,  $J = 5.9$  Hz, 1H), 4.58 (t,  $J = 6.1$  Hz, 2H), 2.74 – 2.59 (m, 2H), 2.42 (s, 3H).

**$^{13}\text{C}$  NMR (151 MHz,  $\text{CDCl}_3$ )**  $\delta$  166.3, 164.1, 144.9, 133.1, 130.1, 129.7, 129.6, 129.3, 128.4, 125.8, 81.8, 60.4, 37.6, 21.7.



#### 4-(Benzoyloxy)-1-chlorobutyl 4-methylbenzoate (SM15)

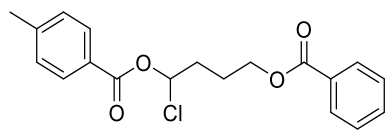

SM15 was prepared by *GP A* as a white oil.

**<sup>1</sup>H NMR (600 MHz, CDCl<sub>3</sub>)** δ 8.09 – 8.03 (m, 2H), 7.98 – 7.92 (m, 2H), 7.57 (tq, *J* = 7.2, 1.2 Hz, 1H), 7.47 – 7.43 (m, 2H), 7.26 (d, *J* = 8.4 Hz, 2H), 6.78 (t, *J* = 5.7 Hz, 1H), 4.42 (td, *J* = 6.3, 1.4 Hz, 2H), 2.42 (s, 3H), 2.37 – 2.31 (m, 2H), 2.12 – 2.05 (m, 2H).

**<sup>13</sup>C NMR (151 MHz, CDCl<sub>3</sub>)** δ 166.5, 164.2, 144.8, 133.0, 130.0, 130.0, 129.6, 129.3, 128.4, 125.9, 84.0, 63.9, 35.1, 24.3, 21.8.

**HRMS** (ESI) calculated for: C<sub>19</sub>H<sub>19</sub>ClNaO<sub>4</sub><sup>+</sup> ([M+Na]<sup>+</sup>) *m/z* 369.0864, found 369.0870.

#### 1-Chloro-5-methoxy-5-oxopentyl 4-methylbenzoate (SM16)

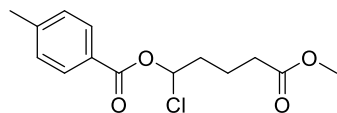

SM16 was prepared by *GP A* as a colorless oil.

**<sup>1</sup>H NMR (600 MHz, CDCl<sub>3</sub>)** δ 7.98 – 7.93 (m, 2H), 7.28 – 7.23 (m, 2H), 6.69 (t, *J* = 5.7 Hz, 1H), 3.68 (s, 3H), 2.44 – 2.40 (m, 5H), 2.25 – 2.16 (m, 2H), 1.91 (p, *J* = 7.5 Hz, 2H).

**<sup>13</sup>C NMR (151 MHz, CDCl<sub>3</sub>)** δ 173.3, 164.2, 144.8, 130.0, 129.3, 126.0, 83.9, 51.7, 37.5, 33.1, 21.7, 20.2.

#### 1-Chloro-3-(methylthio)propyl 4-methylbenzoate (SM17)

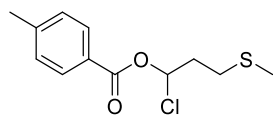

SM17 was prepared by *GP A* as a colorless oil.

**<sup>1</sup>H NMR (600 MHz, CDCl<sub>3</sub>)** δ 7.96 (d, *J* = 8.0 Hz, 2H), 7.27 (d, *J* = 7.7 Hz, 2H), 6.80 (t, *J* = 5.8 Hz, 1H), 2.72 (t, *J* = 7.4 Hz, 2H), 2.50 – 2.39 (m, 5H), 2.14 (s, 3H).

**<sup>13</sup>C NMR (151 MHz, CDCl<sub>3</sub>)** δ 164.1, 144.8, 130.0, 129.3, 125.9, 83.3, 37.8, 29.2, 21.7, 15.6.

**HRMS** (ESI) calculated for: C<sub>12</sub>H<sub>15</sub>ClNaO<sub>2</sub>S<sup>+</sup> ([M+Na]<sup>+</sup>) *m/z* 281.0373, found 281.0345.

#### 1-Chloro-3-tosylpropyl 4-methylbenzoate (SM18)

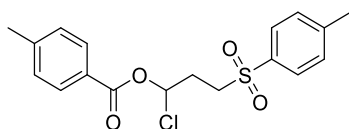

SM18 was prepared by *GPA* as a white solid.

**<sup>1</sup>H NMR (600 MHz, CDCl<sub>3</sub>)** δ 7.91 – 7.86 (m, 2H), 7.84 – 7.80 (m, 2H), 7.41 – 7.37 (m, 2H), 7.28 – 7.24 (m, 2H), 6.74 (t, *J* = 5.2 Hz, 1H), 3.43 – 3.34 (m, 2H), 2.59 – 2.52 (m, 2H), 2.46 (s, 3H), 2.43 (s, 3H).

**<sup>13</sup>C NMR (151 MHz, CDCl<sub>3</sub>)** δ 163.6, 145.2, 145.2, 135.6, 130.1, 130.1, 129.4, 128.1, 125.5, 81.9, 51.7, 31.7, 21.8, 21.7.

**HRMS** (ESI) calculated for: C<sub>18</sub>H<sub>19</sub>ClNaO<sub>4</sub>S<sup>+</sup> ([M+Na]<sup>+</sup>) *m/z* 389.0585, found 389.0575

(3R,5S,7R,8R,9S,10S,12S,13R,14S,17R)-17-((2R,5R)-5-Chloro-5-((4-methylbenzoyl)oxy)pentan-2-yl)-10,13-dimethylhexadecahydro-1H-cyclopenta[a]phenanthrene-3,7,12-triyl triacetate (SM19)

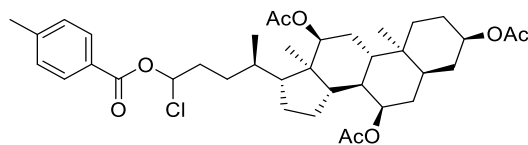

SM19 was prepared by *GPA* as a white solid.

**<sup>1</sup>H NMR (600 MHz, CDCl<sub>3</sub>)** δ 7.94 (d, *J* = 8.2 Hz, 2H), 7.27 – 7.25 (m, 2H), 6.67 – 6.59 (m, 1H), 5.09 (t, *J* = 2.4 Hz, 1H), 4.91 – 4.89 (m, 1H), 4.60 – 4.54 (m, 1H), 2.42 (s, 3H), 2.25 – 2.12 (m, 4H), 2.09 – 2.00 (m, 8H), 1.96 – 1.92 (m, 1H), 1.91 – 1.83 (m, 2H), 1.80 – 1.72 (m, 2H), 1.70 – 1.57 (m, 7H), 1.54 – 1.38 (m, 4H), 1.33 – 1.22 (m, 2H), 1.14 – 1.02 (m, 2H), 0.91 (s, 3H), 0.87 (d, *J* = 6.6 Hz, 3H), 0.73 (d, *J* = 1.9 Hz, 3H).

**<sup>13</sup>C NMR (151 MHz, CDCl<sub>3</sub>)** δ 170.5, 170.5, 170.5, 170.3, 170.3, 164.3, 130.0, 129.3, 129.3, 126.1, 85.1, 84.8, 75.4, 74.1, 70.7, 47.3, 47.3, 45.0, 43.4, 40.9, 37.7, 35.0, 34.8, 34.7, 34.6, 34.4, 34.3, 31.2, 30.8, 30.7, 28.9, 27.2, 27.2, 26.9, 25.6, 22.8, 22.5, 21.7, 21.6, 21.5, 21.4, 17.9, 17.8, 12.2.

**HRMS** (ESI) calculated for: C<sub>38</sub>H<sub>53</sub>ClNaO<sub>8</sub><sup>+</sup> ([M+Na]<sup>+</sup>) *m/z* 695.3321, found 695.3340.

#### *b. Synthesis of Ligands.*

Chiral bisimidazoline ligands were prepared according to the reported procedure.<sup>3</sup>

### Part 4. Cross-Coupling Reactions and Product Characterization

*General procedure for reductive enantioselective reductive cross-coupling reactions:* To a

flame-dried tube with a stir bar was added aryl halide (0.15 mmol, 1.0 equiv), (*R,R*)-**L1** (9 mg, 10 mol%). The tube was transferred into an N<sub>2</sub>-filled glovebox, Mn (24.7 mg, 0.45 mmol, 3.0 equiv), NiBr<sub>2</sub>(DME) (2.3 mg, 5 mol%), LiI (50.2 mg, 2.5 equiv) and TBAI (27.7 mg, 0.5 equiv) were added. The tube was sealed, removed from the glovebox and charged with THF/DME (2:1, 0.9 mL). The mixture was stirred vigorously, ensuring that the reductant was uniformly suspended. After 5 min, 1-chloropropyl 4-methylbenzoate (63.8 mg, 2.0 equiv) was added to the tube by a syringe over 1 min. The mixture was stirred vigorously at 30 °C for 40 h. After that, the mixture was loaded directly onto a silica gel column (eluted with EtOAc/Petroleum ether) to give the target molecule.

The absolute stereochemistry was assigned by comparing the optical rotation of compound **3** with the literature reported measurement.<sup>4</sup> A *S*-configuration was determined for **3** accordingly, and was applied to all the products reported in this work.

**(*S*)-1-(4-(Methoxycarbonyl)phenyl)propyl 4-methylbenzoate (**2**)**

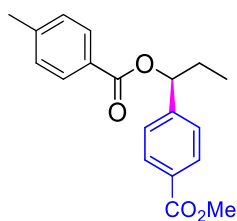

This compound was prepared according to the general procedure using methyl 4-bromobenzoate (32.3 mg, 0.15 mmol, 1.0 equiv) and 1-chloropropyl 4-methylbenzoate (63.8 mg, 0.3 mmol, 2.0 equiv). The crude mixture was purified by flash column chromatograph to afford **2** as an off-white solid

(43.1 mg, 92% yield, 94% ee).

**Chiral HPLC** (CHIRALCEL OD-H), *i*PrOH-hexane 5/95, 1.0 mL/min, 240 nm, *t*<sub>R</sub> (minor) = 8.547 min, *t*<sub>R</sub> (major) = 6.437 min.

**<sup>1</sup>H NMR (600 MHz, CDCl<sub>3</sub>)** δ 8.05 – 7.94 (m, 4H), 7.50 – 7.43 (m, 2H), 7.25 (d, *J* = 7.9 Hz, 2H), 5.94 (dd, *J* = 7.4, 6.0 Hz, 1H), 3.90 (s, 3H), 2.41 (s, 3H), 2.11 – 1.90 (m, 2H), 0.97 (t, *J* = 7.4 Hz, 3H).

**<sup>13</sup>C NMR (151 MHz, CDCl<sub>3</sub>)** δ 166.7, 165.8, 145.9, 143.8, 129.7, 129.6, 129.5, 129.1, 127.4, 126.2, 77.0, 52.0, 29.5, 21.6, 9.8.

**HRMS** (ESI) calculated for C<sub>19</sub>H<sub>20</sub>NaO<sub>4</sub><sup>+</sup> ([M+Na]<sup>+</sup>) *m/z* 335.1254, found 335.1257.

**M.P.** 68.3 – 69.2 °C.

[α]<sub>D</sub><sup>25</sup> = +44 (*c* 0.50, CHCl<sub>3</sub>).

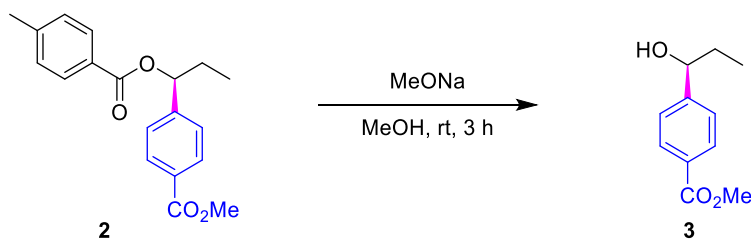

**Scheme S1** Deprotection of the ester **2**

**Methyl (*S*)-4-(1-hydroxypropyl)benzoate (**3**)<sup>d</sup>**

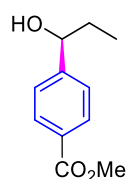

(*S*)-1-(4-(Methoxycarbonyl)phenyl)propyl 4-methylbenzoate (31.2 mg, 0.1 mmol) was added to a stirred solution of MeONa in MeOH (1 mL, 0.15 M). The mixture was stirred at rt for 3 h. Then the reaction mixture was concentrated to give a residue. The crude mixture was purified by flash column chromatography to afford **3** as a colorless oil (31.2

mg, 77% yield, 94% ee).

**Chiral HPLC** (CHIRALPAK AD-H), *i*PrOH-hexane 10/90, 1.0 mL/min, 240 nm,  $t_R$  (minor) = 16.149 min,  $t_R$  (major) = 17.970 min.

**<sup>1</sup>H NMR (600 MHz, CDCl<sub>3</sub>)**  $\delta$  8.04 – 7.94 (m, 2H), 7.41 (d,  $J$  = 8.2 Hz, 2H), 4.67 (t,  $J$  = 6.5 Hz, 1H), 3.91 (s, 3H), 2.03 (s, 1H), 1.85 – 1.72 (m, 2H), 0.92 (t,  $J$  = 7.4 Hz, 3H).

**<sup>13</sup>C NMR (101 MHz, CDCl<sub>3</sub>)**  $\delta$  170.0, 149.7, 129.6, 129.1, 125.8, 75.3, 52.1, 31.9, 9.9.

**HRMS** (ESI) calculated for C<sub>11</sub>H<sub>14</sub>O<sub>3</sub><sup>+</sup> ([M+H]<sup>+</sup>)  $m/z$  195.1016, found 195.1014.

$[\alpha]_D^{20}$  = -21 ( $c$  0.50, CH<sub>2</sub>Cl<sub>2</sub>).

$[\alpha]_D^{20}$  = +24.4 ( $c$  1.09, CH<sub>2</sub>Cl<sub>2</sub>) for methyl (*R*)-4-(1-hydroxypropyl)benzoate in the literature.

**(*S*)-1-(4-(Methoxycarbonyl)phenyl)propyl 2-methylbenzoate (**4**)**

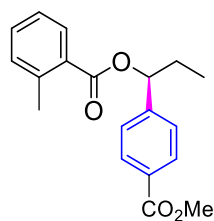

This compound was prepared according to the general procedure using methyl 4-bromobenzoate (32.3 mg, 0.15 mmol, 1.0 equiv) and 1-chloropropyl 2-methylbenzoate (63.8 mg, 0.3 mmol, 2.0 equiv). The crude mixture was purified by flash column chromatography to afford **4** as a colorless oil (43.1 mg,

92% yield, 90% ee).

**Chiral HPLC** (CHIRALCEL OD-H), *i*PrOH-hexane 2/98, 0.50 mL/min, 240 nm,  $t_R$  (minor) = 15.656 min,  $t_R$  (major) = 14.783 min.

**<sup>1</sup>H NMR (600 MHz, CDCl<sub>3</sub>)**  $\delta$  8.08 – 8.01 (m, 2H), 7.99 (dd,  $J$  = 7.8, 1.5 Hz, 1H), 7.51 – 7.45 (m, 2H), 7.41 (td,  $J$  = 7.5, 1.5 Hz, 1H), 7.30 – 7.22 (m, 2H), 5.93 (dd,  $J$  = 7.3, 6.1 Hz, 1H), 3.91 (s, 3H), 2.58 (s,

3H), 2.12 – 1.91 (m, 2H), 0.98 (t,  $J = 7.4$  Hz, 3H).

**$^{13}\text{C}$  NMR (151 MHz,  $\text{CDCl}_3$ )**  $\delta$  166.8, 166.7, 145.8, 140.3, 132.1, 131.7, 130.5, 129.8, 129.6, 129.5, 126.4, 125.7, 77.2, 52.1, 29.5, 21.8, 9.9.

**HRMS** (ESI) calculated for  $\text{C}_{19}\text{H}_{20}\text{NaO}_4^+$  ( $[\text{M}+\text{Na}]^+$ )  $m/z$  335.1254, found 335.1253.

$[\alpha]_{\text{D}}^{25} = +17$  ( $c$  0.50,  $\text{CHCl}_3$ ).

#### (*S*)-1-(4-(Methoxycarbonyl)phenyl)propyl 3,5-dimethylbenzoate (**5**)

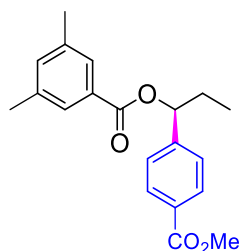

This compound was prepared according to the general procedure using methyl 4-bromobenzoate (32.3 mg, 0.15 mmol, 1.0 equiv) and 1-chloropropyl 3,5-dimethylbenzoate (68.0 mg, 0.3 mmol, 2.0 equiv). The crude mixture was purified by flash column chromatograph to afford **5** as an off-white solid (42.0 mg, 86% yield, 92% ee).

**Chiral HPLC** (CHIRALCEL OD-H), *i*PrOH-hexane 5/95, 1.0 mL/min, 240 nm,  $t_{\text{R}}$  (minor) = 6.741 min,  $t_{\text{R}}$  (major) = 5.577 min.

**$^1\text{H}$  NMR (600 MHz,  $\text{CDCl}_3$ )**  $\delta$  8.06 – 7.99 (m, 2H), 7.69 (d,  $J = 1.7$  Hz, 2H), 7.51 – 7.44 (m, 2H), 7.20 (s, 1H), 5.94 (dd,  $J = 7.4, 5.9$  Hz, 1H), 3.90 (s, 3H), 2.37 (s, 6H), 2.12 – 1.91 (m, 2H), 0.98 (t,  $J = 7.4$  Hz, 3H).

**$^{13}\text{C}$  NMR (151 MHz,  $\text{CDCl}_3$ )**  $\delta$  166.8, 166.1, 145.8, 138.1, 134.7, 130.0, 129.7, 129.5, 127.3, 126.3, 77.1, 52.1, 29.5, 21.1, 9.8.

**HRMS** (ESI) calculated for  $\text{C}_{20}\text{H}_{22}\text{NaO}_4^+$  ( $[\text{M}+\text{Na}]^+$ )  $m/z$  349.1411, found 349.1413.

**M.P.** 62.3 – 63.1 °C.

$[\alpha]_{\text{D}}^{25} = +48$  ( $c$  0.50,  $\text{CHCl}_3$ ).

#### (*S*)-1-(4-(Methoxycarbonyl)phenyl)propyl 4-fluorobenzoate (**6**)

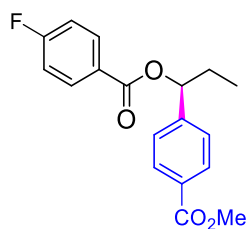

This compound was prepared according to the general procedure using methyl 4-bromobenzoate (32.3 mg, 0.15 mmol, 1.0 equiv) and 1-chloropropyl 4-fluorobenzoate (65 mg, 0.3 mmol, 2.0 equiv). The crude mixture was purified by flash column chromatograph to afford **6** as a colorless oil (41.7 mg, 88% yield, 91% ee).

**Chiral HPLC** (CHIRALCEL OD-H), *i*PrOH-hexane 5/95, 1.0 mL/min, 240 nm,  $t_{\text{R}}$  (minor) = 14.839

min,  $t_R$  (major) = 6.414 min.

**$^1\text{H NMR}$  (600 MHz,  $\text{CDCl}_3$ )**  $\delta$  8.15 – 8.06 (m, 2H), 8.05 – 7.99 (m, 2H), 7.46 (d,  $J$  = 8.3 Hz, 2H), 7.16 – 7.08 (m, 2H), 5.93 (dd,  $J$  = 7.4, 6.1 Hz, 1H), 3.90 (s, 3H), 2.11 – 1.90 (m, 2H), 0.96 (t,  $J$  = 7.4 Hz, 3H).

**$^{13}\text{C NMR}$  (151 MHz,  $\text{CDCl}_3$ )**  $\delta$  166.7, 165.8 (d,  $J$  = 254.2 Hz), 164.8, 145.5, 132.2 (d,  $J$  = 9.4 Hz), 129.8, 129.7, 126.4 (d,  $J$  = 2.9 Hz), 126.3, 115.6 (d,  $J$  = 22.0 Hz), 77.5, 52.1, 29.4, 9.8.

**$^{19}\text{F NMR}$  (565 MHz,  $\text{CDCl}_3$ )**  $\delta$  -105.36.

**HRMS** (ESI) calculated for  $\text{C}_{18}\text{H}_{17}\text{FNaO}_4^+$  ( $[\text{M}+\text{Na}]^+$ )  $m/z$  339.1004, found 339.1003.

$[\alpha]_D^{25} = +31$  ( $c$  1.00,  $\text{CHCl}_3$ ).

#### (*S*)-1-(4-(Methoxycarbonyl)phenyl)propyl 4-(*tert*-butyl)benzoate (**7**)

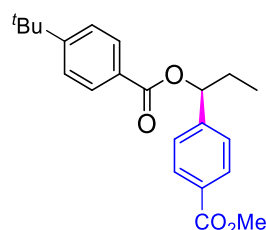

This compound was prepared according to the general procedure using methyl 4-bromobenzoate (32.3 mg, 0.15 mmol, 1.0 equiv) and 1-chloropropyl 4-(*tert*-butyl)benzoate (76.4 mg, 0.3 mmol, 2.0 equiv). The crude mixture was purified by flash column chromatograph to afford **7** as a colorless oil (48.4 mg, 91% yield, 92% ee).

**Chiral HPLC** (CHIRALCEL OD-H), *i*PrOH-hexane 5/95, 1.0 mL/min, 240 nm,  $t_R$  (minor) = 6.229 min,  $t_R$  (major) = 5.584 min.

**$^1\text{H NMR}$  (600 MHz,  $\text{CDCl}_3$ )**  $\delta$  8.06 – 7.99 (m, 4H), 7.51 – 7.44 (m, 4H), 5.95 (dd,  $J$  = 7.4, 5.9 Hz, 1H), 3.90 (s, 3H), 2.10 – 1.90 (m, 2H), 1.34 (s, 9H), 0.97 (t,  $J$  = 7.4 Hz, 3H).

**$^{13}\text{C NMR}$  (151 MHz,  $\text{CDCl}_3$ )**  $\delta$  166.8, 165.8, 156.8, 145.9, 129.7, 129.5, 129.5, 127.4, 126.2, 125.4, 77.0, 52.1, 35.1, 31.1, 29.5, 9.8.

**HRMS** (ESI) calculated for  $\text{C}_{22}\text{H}_{26}\text{NaO}_4^+$  ( $[\text{M}+\text{Na}]^+$ )  $m/z$  377.1724, found 377.1722.

$[\alpha]_D^{25} = +78$  ( $c$  0.50,  $\text{CHCl}_3$ ).

#### (*S*)-1-(4-(Methoxycarbonyl)phenyl)propyl 2-naphthoate (**8**)

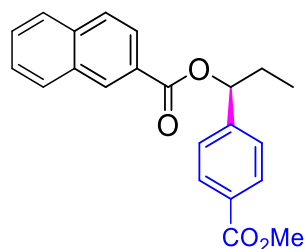

This compound was prepared according to the general procedure using methyl 4-bromobenzoate (32.3 mg, 0.15 mmol, 1.0 equiv) and 1-chloropropyl 2-naphthoate (74.6 mg, 0.3 mmol, 2.0 equiv). The crude mixture was purified by flash column chromatograph to afford **8** as an

off-white solid (45.0 mg, 86% yield, 90% ee).

**Chiral HPLC** (CHIRALCEL OD-H), *i*PrOH-hexane 5/95, 1.0 mL/min, 240 nm,  $t_R$  (minor) = 14.295 min,  $t_R$  (major) = 8.978 min.

**$^1\text{H NMR}$  (600 MHz,  $\text{CDCl}_3$ )**  $\delta$  8.65 (t,  $J = 1.1$  Hz, 1H), 8.10 (dd,  $J = 8.6, 1.7$  Hz, 1H), 8.06 – 8.02 (m, 2H), 8.00 – 7.95 (m, 1H), 7.89 (dd,  $J = 8.4, 5.5$  Hz, 2H), 7.60 (ddd,  $J = 8.2, 6.8, 1.3$  Hz, 1H), 7.56 (ddd,  $J = 8.1, 6.8, 1.3$  Hz, 1H), 7.54 – 7.50 (m, 2H), 6.04 – 5.99 (m, 1H), 3.91 (s, 3H), 2.19 – 2.09 (m, 1H), 2.05 – 1.99 (m, 1H), 1.01 (t,  $J = 7.4$  Hz, 3H).

**$^{13}\text{C NMR}$  (151 MHz,  $\text{CDCl}_3$ )**  $\delta$  166.7, 165.9, 145.7, 135.6, 132.4, 131.1, 129.8, 129.6, 129.3, 128.3, 128.2, 127.7, 127.4, 126.7, 126.3, 125.2, 77.4, 52.1, 29.5, 9.8.

**HRMS** (ESI) calculated for  $\text{C}_{22}\text{H}_{20}\text{NaO}_4^+$  ( $[\text{M}+\text{Na}]^+$ )  $m/z$  371.1254, found 371.1249.

**M.P.** 113.1 – 113.9 °C.

$[\alpha]_{\text{D}}^{25} = +121$  ( $c$  0.50,  $\text{CHCl}_3$ ).

#### (*S*)-1-(4-(Methoxycarbonyl)phenyl)ethyl 4-methylbenzoate (**9**)

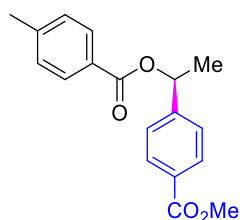

This compound was prepared according to the general procedure using methyl 4-bromobenzoate (32.3 mg, 0.15 mmol, 1.0 equiv) and 1-chloroethyl 4-methylbenzoate (59.6 mg, 0.3 mmol, 2.0 equiv). The crude mixture was purified by flash column chromatograph to afford **9** as a colorless oil (41.0 mg,

92% yield, 93% ee).

**Chiral HPLC** (CHIRALCEL OD-H), *i*PrOH-hexane 5/95, 1.0 mL/min, 240 nm,  $t_R$  (minor) = 13.100 min,  $t_R$  (major) = 7.092 min.

**$^1\text{H NMR}$  (600 MHz,  $\text{CDCl}_3$ )**  $\delta$  8.07 – 8.01 (m, 2H), 8.01 – 7.95 (m, 2H), 7.52 – 7.47 (m, 2H), 7.25 (d,  $J = 7.9$  Hz, 2H), 6.14 (q,  $J = 6.6$  Hz, 1H), 3.91 (s, 3H), 2.41 (s, 3H), 1.67 (d,  $J = 6.6$  Hz, 3H).

**$^{13}\text{C NMR}$  (151 MHz,  $\text{CDCl}_3$ )**  $\delta$  166.7, 165.7, 147.0, 143.8, 129.9, 129.6, 129.5, 129.1, 127.4, 125.8, 72.1, 52.1, 22.4, 21.6.

**HRMS** (ESI) calculated for  $\text{C}_{18}\text{H}_{18}\text{NaO}_4^+$  ( $[\text{M}+\text{Na}]^+$ )  $m/z$  321.1098, found 321.1098

$[\alpha]_{\text{D}}^{25} = +64$  ( $c$  0.50,  $\text{CHCl}_3$ ).

#### (*S*)-1-(4-(Methoxycarbonyl)phenyl)butyl 4-methylbenzoate (**10**)

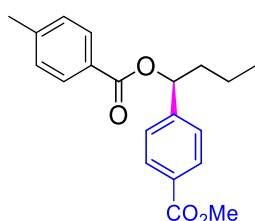

This compound was prepared according to the general procedure using methyl 4-bromobenzoate (32.3 mg, 0.15 mmol, 1.0 equiv) and

1-chlorobutyl 4-methylbenzoate (68.0 mg, 0.3 mmol, 2.0 equiv). The crude mixture was purified by flash column chromatograph to afford **10** as an off-white solid (45.0 mg, 92% yield, 92% ee).

**Chiral HPLC** (CHIRALCEL OD-H), *i*PrOH-hexane 5/95, 0.5 mL/min, 240 nm,  $t_R$  (minor) = 15.732 min,  $t_R$  (major) = 12.030 min.

**$^1\text{H NMR}$  (600 MHz,  $\text{CDCl}_3$ )**  $\delta$  8.06 – 7.94 (m, 4H), 7.47 (d,  $J$  = 8.2 Hz, 2H), 7.28 – 7.22 (m, 2H), 6.01 (dd,  $J$  = 7.9, 5.7 Hz, 1H), 3.90 (s, 3H), 2.41 (s, 3H), 2.08 – 2.00 (m, 1H), 1.89 – 1.83 (m, 1H), 1.48 – 1.33 (m, 2H), 0.95 (t,  $J$  = 7.4 Hz, 3H).

**$^{13}\text{C NMR}$  (151 MHz,  $\text{CDCl}_3$ )**  $\delta$  166.8, 165.8, 146.2, 143.8, 129.8, 129.6, 129.5, 129.1, 127.4, 126.2, 75.7, 52.1, 38.6, 21.6, 18.7, 13.8.

**HRMS** (ESI) calculated for  $\text{C}_{20}\text{H}_{22}\text{NaO}_4^+$  ( $[\text{M}+\text{Na}]^+$ )  $m/z$  349.1411, found 349.1445.

**M.P.** 78.5 – 79.2 °C.

$[\alpha]_{\text{D}}^{25} = +62$  ( $c$  0.50,  $\text{CHCl}_3$ ).

#### (*S*)-1-(4-(Methoxycarbonyl)phenyl)hexyl 4-methylbenzoate (**11**)

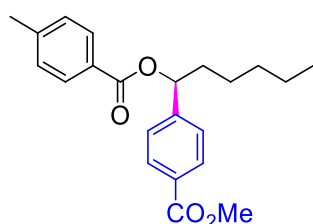

This compound was prepared according to the general procedure using methyl 4-bromobenzoate (32.3 mg, 0.15 mmol, 1.0 equiv) and 1-chlorohexyl 4-methylbenzoate (76.4 mg, 0.3 mmol, 2.0 equiv). The crude mixture was purified by flash column chromatograph to afford **11** as a colorless oil (46.0 mg, 87% yield, 93% ee).

**Chiral HPLC** (CHIRALCEL OD-H), *i*PrOH-hexane 5/95, 1.0 mL/min, 240 nm,  $t_R$  (minor) = 7.057 min,  $t_R$  (major) = 5.312 min.

**$^1\text{H NMR}$  (600 MHz,  $\text{CDCl}_3$ )**  $\delta$  8.05 – 8.00 (m, 2H), 8.00 – 7.96 (m, 2H), 7.47 (d,  $J$  = 8.3 Hz, 2H), 7.25 (d,  $J$  = 7.8 Hz, 2H), 6.00 (dd,  $J$  = 7.7, 5.8 Hz, 1H), 3.90 (s, 3H), 2.41 (s, 3H), 2.09 – 1.99 (m, 1H), 1.92 – 1.86 (m, 1H), 1.35 – 1.25 (m, 6H), 0.86 (t,  $J$  = 7.0 Hz, 3H).

**$^{13}\text{C NMR}$  (151 MHz,  $\text{CDCl}_3$ )**  $\delta$  166.7, 165.8, 146.2, 143.7, 129.8, 129.6, 129.5, 129.1, 127.4, 126.2, 75.9, 52.0, 36.4, 31.4, 25.0, 22.4, 21.6, 13.9.

**HRMS** (ESI) calculated for  $\text{C}_{22}\text{H}_{26}\text{NaO}_4^+$  ( $[\text{M}+\text{Na}]^+$ )  $m/z$  377.1724, found 377.1724

$[\alpha]_{\text{D}}^{25} = +54$  ( $c$  0.50,  $\text{CHCl}_3$ ).

#### (*S*)-1-(4-(Methoxycarbonyl)phenyl)heptyl 4-methylbenzoate (**12**)



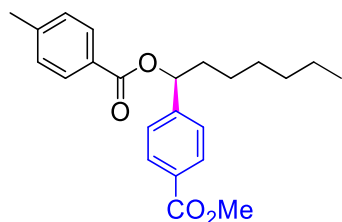

This compound was prepared according to the general procedure using methyl 4-bromobenzoate (32.3 mg, 0.15 mmol, 1.0 equiv) and 1-chloroheptyl 4-methylbenzoate (80.6 mg, 0.3 mmol, 2.0 equiv). The crude mixture was purified by flash column chromatograph to afford **12** as a colorless oil (46.0 mg, 83% yield, 91% ee).

**Chiral HPLC** (CHIRALCEL OD-H), *i*PrOH-hexane 5/95, 1.0 mL/min, 240 nm,  $t_R$  (minor) = 6.779 min,  $t_R$  (major) = 5.139 min.

**$^1\text{H NMR}$  (600 MHz,  $\text{CDCl}_3$ )**  $\delta$  8.05 – 8.00 (m, 2H), 7.99 – 7.94 (m, 2H), 7.47 (d,  $J$  = 8.3 Hz, 2H), 7.25 (d,  $J$  = 7.8 Hz, 2H), 5.99 (dd,  $J$  = 7.8, 5.8 Hz, 1H), 3.90 (s, 3H), 2.41 (s, 3H), 2.07 – 2.01 (m, 1H), 1.92 – 1.86 (m, 1H), 1.37 – 1.20 (m, 8H), 0.86 (t,  $J$  = 6.9 Hz, 3H).

**$^{13}\text{C NMR}$  (151 MHz,  $\text{CDCl}_3$ )**  $\delta$  166.8, 165.8, 146.2, 143.7, 129.8, 129.6, 129.5, 129.1, 127.4, 126.2, 75.9, 52.0, 36.5, 31.6, 29.0, 25.3, 22.5, 21.6, 14.0.

**HRMS** (ESI) calculated for  $\text{C}_{23}\text{H}_{28}\text{NaO}_4^+$  ( $[\text{M}+\text{Na}]^+$ )  $m/z$  391.1880, found 391.1877.

$[\alpha]_D^{25} = +47$  ( $c$  0.50,  $\text{CHCl}_3$ ).

### **(S)-1-(4-(Methoxycarbonyl)phenyl)dodecyl 4-methylbenzoate (13)**

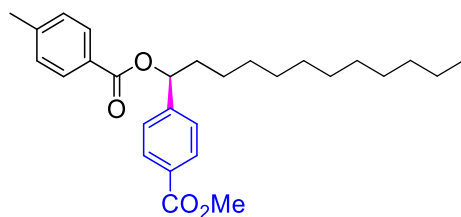

This compound was prepared according to the general procedure using methyl 4-bromobenzoate (32.3 mg, 0.15 mmol, 1.0 equiv) and 1-chlorododecyl 4-methylbenzoate (101.7 mg, 0.3 mmol, 2.0 equiv). The crude mixture was

purified by flash column chromatograph to afford **13** as a colorless oil (52.0 mg, 79% yield, 91% ee).

**Chiral HPLC** (CHIRALCEL OD-H), *i*PrOH-hexane 2/98, 0.5 mL/min, 240 nm,  $t_R$  (minor) = 18.667 min,  $t_R$  (major) = 11.545 min.

**$^1\text{H NMR}$  (600 MHz,  $\text{CDCl}_3$ )**  $\delta$  8.08 – 7.92 (m, 4H), 7.47 (d,  $J$  = 8.3 Hz, 2H), 7.25 (d,  $J$  = 8.0 Hz, 2H), 5.99 (dd,  $J$  = 7.8, 5.8 Hz, 1H), 3.90 (s, 3H), 2.41 (s, 3H), 2.07 – 1.97 (m, 1H), 1.91 – 1.86 (m, 1H), 1.43 – 1.21 (m, 18H), 0.87 (t,  $J$  = 7.0 Hz, 3H).

**$^{13}\text{C NMR}$  (151 MHz,  $\text{CDCl}_3$ )**  $\delta$  166.8, 165.8, 146.2, 143.7, 129.8, 129.6, 129.5, 129.1, 127.5, 126.2, 75.9, 52.0, 36.5, 31.9, 29.6, 29.5, 29.4, 29.3, 25.4, 22.6, 21.6, 14.1.

**HRMS** (ESI) calculated for  $\text{C}_{28}\text{H}_{38}\text{NaO}_4^+$  ( $[\text{M}+\text{Na}]^+$ )  $m/z$  461.2663, found 461.2674.

$[\alpha]_D^{25} = +42$  ( $c$  0.50,  $\text{CHCl}_3$ ).

#### Methyl (S)-4-(1-(isobutyryloxy)propyl)benzoate (**14**)

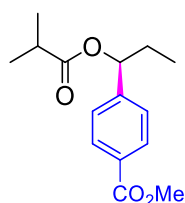

This compound was prepared according to the general procedure using methyl 4-bromobenzoate (32.3 mg, 0.15 mmol, 1.0 equiv) and 1-chloropropyl isobutyrate (49.4 mg, 0.3 mmol, 2.0 equiv). The crude mixture was purified by flash column chromatograph to afford **14** as a colorless oil (30.6 mg, 77% yield, 84% ee).

**Chiral HPLC** (CHIRALCEL OD-H), *i*PrOH-hexane 2/98, 0.5 mL/min, 240 nm,  $t_R$  (minor) = 12.215 min,  $t_R$  (major) = 11.048 min.

**<sup>1</sup>H NMR (600 MHz, CDCl<sub>3</sub>)**  $\delta$  8.07 – 7.95 (m, 2H), 7.37 (d,  $J$  = 8.3 Hz, 2H), 5.68 (dd,  $J$  = 7.5, 6.0 Hz, 1H), 3.90 (s, 3H), 2.59 (hept,  $J$  = 7.0 Hz, 1H), 1.94 – 1.77 (m, 2H), 1.19 (d,  $J$  = 7.0 Hz, 3H), 1.15 (d,  $J$  = 7.1 Hz, 3H), 0.89 (t,  $J$  = 7.4 Hz, 3H).

**<sup>13</sup>C NMR (151 MHz, CDCl<sub>3</sub>)**  $\delta$  176.2, 166.8, 146.0, 129.7, 129.5, 126.2, 76.3, 52.1, 34.1, 29.4, 18.9, 18.8, 9.7.

**HRMS** (ESI) calculated for C<sub>15</sub>H<sub>20</sub>NaO<sub>4</sub><sup>+</sup> ([M+Na]<sup>+</sup>)  $m/z$  287.1254, found 287.1252.

$[\alpha]_D^{25} = -15$  ( $c$  0.30, CHCl<sub>3</sub>).

#### (S)-1-(4-(Methoxycarbonyl)phenyl)-3-methylbutyl 4-methylbenzoate (**15**)

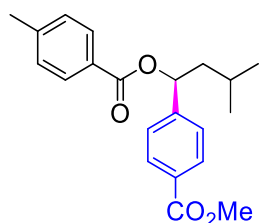

This compound was prepared according to the general procedure using methyl 4-bromobenzoate (32.3 mg, 0.15 mmol, 1.0 equiv) and 1-chloro-3-methylbutyl 4-methylbenzoate (72.2 mg, 0.3 mmol, 2.0 equiv). The crude mixture was purified by flash column chromatograph to afford **15** as a colorless oil (28.1 mg, 55% yield, 93% ee).

**Chiral HPLC** (CHIRALCEL OD-H), *i*PrOH-hexane 2/98, 0.5 mL/min, 240 nm,  $t_R$  (minor) = 15.013 min,  $t_R$  (major) = 13.108 min.

**<sup>1</sup>H NMR (600 MHz, CDCl<sub>3</sub>)**  $\delta$  8.08 – 8.00 (m, 2H), 7.99 – 7.91 (m, 2H), 7.53 – 7.44 (m, 2H), 7.25 (d,  $J$  = 8.0 Hz, 2H), 6.07 (dd,  $J$  = 9.1, 4.8 Hz, 1H), 3.90 (s, 3H), 2.41 (s, 3H), 2.05 – 1.98 (m, 1H), 1.75 – 1.66 (m, 2H), 0.98 (dd,  $J$  = 10.2, 6.3 Hz, 6H).

**<sup>13</sup>C NMR (151 MHz, CDCl<sub>3</sub>)**  $\delta$  166.7, 165.8, 146.5, 143.8, 129.8, 129.6, 129.5, 129.1, 127.4, 126.2, 74.4, 52.0, 45.7, 24.8, 22.9, 22.2, 21.6.

**HRMS** (ESI) calculated for C<sub>21</sub>H<sub>24</sub>NaO<sub>4</sub><sup>+</sup> ([M+Na]<sup>+</sup>)  $m/z$  363.1567, found 363.1570

$[\alpha]_D^{25} = +63$  (*c* 0.50, CHCl<sub>3</sub>).

**(S)-1-(4-(Methoxycarbonyl)phenyl)-3-phenylpropyl 4-methylbenzoate (16)**

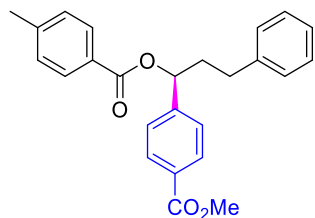

This compound was prepared according to the general procedure using methyl 4-bromobenzoate (32.3 mg, 0.15 mmol, 1.0 equiv) and 1-chloro-3-phenylpropyl 4-methylbenzoate (86.6 mg, 0.3 mmol, 2.0 equiv). The crude mixture was purified by flash column chromatograph

to afford **16** as a colorless oil (55.0 mg, 94% yield, 85% ee).

**Chiral HPLC** (CHIRALCEL OD-H), *i*PrOH-hexane 5/95, 1.0 mL/min, 240 nm,  $t_R$  (minor) = 21.179 min,  $t_R$  (major) = 11.981 min.

**<sup>1</sup>H NMR (600 MHz, CDCl<sub>3</sub>)**  $\delta$  7.98 – 7.92 (m, 2H), 7.91 – 7.85 (m, 2H), 7.42 – 7.35 (m, 2H), 7.18 (dd,  $J = 7.7, 4.4$  Hz, 4H), 7.12 – 7.05 (m, 3H), 5.93 (dd,  $J = 8.1, 5.3$  Hz, 1H), 3.82 (s, 3H), 2.71 – 2.56 (m, 2H), 2.39 – 2.26 (m, 4H), 2.17 – 2.11 (m, 1H).

**<sup>13</sup>C NMR (151 MHz, CDCl<sub>3</sub>)**  $\delta$  166.7, 165.7, 145.8, 143.9, 140.8, 129.9, 129.7, 129.1, 128.5, 128.3, 127.3, 126.2, 126.1, 75.3, 52.1, 38.0, 31.7, 21.7.

**HRMS** (ESI) calculated for C<sub>25</sub>H<sub>25</sub>O<sub>4</sub><sup>+</sup> ([M+H]<sup>+</sup>)  $m/z$  389.1748, found 389.1743.

$[\alpha]_D^{25} = +49$  (*c* 0.50, CHCl<sub>3</sub>).

**(S)-1-(4-(Methoxycarbonyl)phenyl)-3,3-dimethylbutyl 4-methylbenzoate (17)**

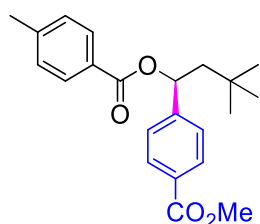

This compound was prepared according to the general procedure using methyl 4-bromobenzoate (32.3 mg, 0.15 mmol, 1.0 equiv) and 1-chloro-3,3-dimethylbutyl 4-methylbenzoate (76.4 mg, 0.3 mmol, 2.0 equiv). The crude mixture was purified by flash column chromatograph to afford **17** as a colorless oil (17.0 mg, 32% yield, 92% ee).

**Chiral HPLC** (CHIRALPAK IC-H), *i*PrOH-hexane 5/95, 1.0 mL/min, 240 nm,  $t_R$  (minor) = 10.448 min,  $t_R$  (major) = 8.973 min.

**<sup>1</sup>H NMR (600 MHz, CDCl<sub>3</sub>)**  $\delta$  8.02 – 7.98 (m, 2H), 7.98 – 7.94 (m, 2H), 7.48 – 7.41 (m, 2H), 7.25 (d,  $J = 8.0$  Hz, 2H), 6.12 (dd,  $J = 9.5, 2.8$  Hz, 1H), 3.89 (s, 3H), 2.41 (s, 3H), 2.11 (dd,  $J = 14.9, 9.6$  Hz, 1H), 1.68 (dd,  $J = 14.9, 2.9$  Hz, 1H), 1.01 (s, 9H).

**<sup>13</sup>C NMR (151 MHz, CDCl<sub>3</sub>)**  $\delta$  16.8, 165.7, 147.7, 143.8, 129.9, 129.7, 129.4, 129.1, 127.4, 126.0,

74.0, 52.1, 50.2, 30.6, 30.0, 21.7.

**HRMS** (ESI) calculated for  $C_{22}H_{26}NaO_4^+$  ( $[M+Na]^+$ )  $m/z$  377.1724, found 377.1712.

$[\alpha]_D^{25} = +69$  ( $c$  0.50,  $CHCl_3$ ).

**(S)-4-(Benzoyloxy)-1-(4-(methoxycarbonyl)phenyl)butyl 4-methylbenzoate (18)**

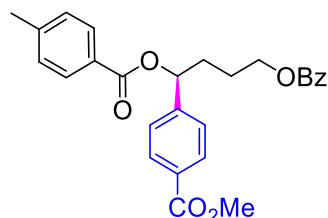

This compound was prepared according to the general procedure using methyl 4-bromobenzoate (32.3 mg, 0.15 mmol, 1.0 equiv) and 4-(benzoyloxy)-1-chlorobutyl 4-methylbenzoate (104.0 mg, 0.3 mmol, 2.0 equiv). The crude mixture was purified by flash column

chromatograph to afford **18** as a colorless solid (60.0 mg, 90% yield, 90% ee).

**Chiral HPLC** (CHIRALCEL OD-H), *i*PrOH-hexane 10/90, 1.0 mL/min, 240 nm,  $t_R$  (minor) = 22.185 min,  $t_R$  (major) = 15.762 min.

**$^1H$  NMR (600 MHz,  $CDCl_3$ )**  $\delta$  8.07 – 8.00 (m, 4H), 8.00 – 7.94 (m, 2H), 7.58 – 7.53 (m, 1H), 7.52 – 7.48 (m, 2H), 7.45 – 7.40 (m, 2H), 7.26 (d,  $J$  = 2.4 Hz, 2H), 6.09 (dd,  $J$  = 7.8, 5.5 Hz, 1H), 4.36 (td,  $J$  = 6.5, 2.8 Hz, 2H), 3.90 (s, 3H), 2.41 (s, 3H), 2.25 – 2.16 (m, 1H), 2.13 – 2.07 (m, 1H), 1.98 – 1.80 (m, 2H).

**$^{13}C$  NMR (151 MHz,  $CDCl_3$ )**  $\delta$  166.6, 166.5, 165.7, 145.5, 143.9, 132.9, 130.1, 129.9, 129.8, 129.7, 129.5, 129.1, 128.3, 127.2, 126.2, 75.3, 64.3, 52.1, 33.0, 24.8, 21.6.

**HRMS** (ESI) calculated for  $C_{27}H_{26}NaO_6^+$  ( $[M+Na]^+$ )  $m/z$  469.1622, found 469.1620.

**M.P.** 66.7 – 67.2 °C.

$[\alpha]_D^{25} = +48$  ( $c$  0.50,  $CHCl_3$ ).

**(S)-3-(Benzoyloxy)-1-(4-(methoxycarbonyl)phenyl)propyl 4-methylbenzoate (19)**

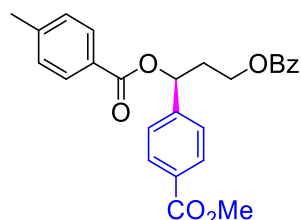

This compound was prepared according to the general procedure using methyl 4-bromobenzoate (32.3 mg, 0.15 mmol, 1.0 equiv) and 3-(benzoyloxy)-1-chloropropyl 4-methylbenzoate (99.8 mg, 0.3 mmol, 2.0 equiv). The crude mixture was purified by flash column

chromatograph to afford **19** as a colorless oil (58.0 mg, 89% yield, 88% ee).

**Chiral HPLC** (CHIRALCEL OD-H), *i*PrOH-hexane 10/90, 1.0 mL/min, 240 nm,  $t_R$  (minor) = 19.429 min,  $t_R$  (major) = 15.306 min.

**<sup>1</sup>H NMR (600 MHz, CDCl<sub>3</sub>)** δ 8.06 – 8.01 (m, 2H), 8.00 – 7.94 (m, 4H), 7.57 – 7.50 (m, 3H), 7.42 – 7.37 (m, 2H), 7.25 – 7.20 (m, 2H), 6.25 (dd, *J* = 8.0, 5.4 Hz, 1H), 4.53 – 4.37 (m, 2H), 3.90 (s, 3H), 2.62 – 2.49 (m, 1H), 2.46 – 2.34 (m, 4H).

**<sup>13</sup>C NMR (151 MHz, CDCl<sub>3</sub>)** δ 166.6, 166.3, 165.6, 145.1, 144.0, 132.9, 130.0, 129.9, 129.8, 129.7, 129.5, 129.1, 128.3, 127.0, 126.1, 73.0, 61.0, 52.1, 35.5, 21.6.

**HRMS** (ESI) calculated for C<sub>26</sub>H<sub>24</sub>NaO<sub>6</sub><sup>+</sup> ([M+Na]<sup>+</sup>) *m/z* 455.1466, found 455.1464

[α]<sub>D</sub><sup>25</sup> = +49 (*c* 0.50, CHCl<sub>3</sub>).

### **(S)-5-Methoxy-1-(4-(methoxycarbonyl)phenyl)-5-oxopentyl 4-methylbenzoate (20)**

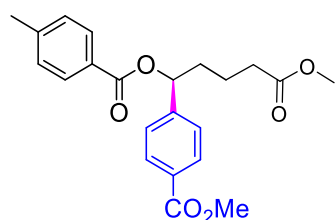

This compound was prepared according to the general procedure using methyl 4-bromobenzoate (32.3 mg, 0.15 mmol, 1.0 equiv) and 1-chloro-5-methoxy-5-oxopentyl 4-methylbenzoate (85.4 mg, 0.3 mmol, 2.0 equiv). The crude mixture was purified by flash column

chromatograph to afford **20** as a colorless oil (52.0 mg, 90% yield, 92% ee).

**Chiral HPLC** (CHIRALCEL OD-H), *i*PrOH-hexane 5/95, 1.0 mL/min, 240 nm, *t*<sub>R</sub> (minor) = 21.246 min, *t*<sub>R</sub> (major) = 14.579 min.

**<sup>1</sup>H NMR (600 MHz, CDCl<sub>3</sub>)** δ 8.01 (d, *J* = 8.3 Hz, 2H), 7.97 (d, *J* = 8.2 Hz, 2H), 7.46 (d, *J* = 8.3 Hz, 2H), 7.25 (d, *J* = 8.0 Hz, 2H), 6.01 (dd, *J* = 7.9, 5.4 Hz, 1H), 3.90 (s, 3H), 3.64 (s, 3H), 2.41 (s, 3H), 2.36 (t, *J* = 7.4 Hz, 2H), 2.11 – 2.05 (m, 1H), 1.98 – 1.92 (m, 1H), 1.81 – 1.74 (m, 1H), 1.73 – 1.65 (m, 1H).

**<sup>13</sup>C NMR (151 MHz, CDCl<sub>3</sub>)** δ 173.5, 166.7, 165.7, 145.6, 143.9, 129.9, 129.7, 129.7, 129.1, 127.2, 126.1, 75.3, 52.1, 51.5, 35.8, 33.5, 21.6, 20.8.

**HRMS** (ESI) calculated for C<sub>22</sub>H<sub>24</sub>NaO<sub>6</sub><sup>+</sup> ([M+Na]<sup>+</sup>) *m/z* 407.1466, found 407.1475.

[α]<sub>D</sub><sup>25</sup> = +59 (*c* 0.50, CHCl<sub>3</sub>).

### **(S)-1-(4-(Methoxycarbonyl)phenyl)-3-(methylthio)propyl 4-methylbenzoate (21)**

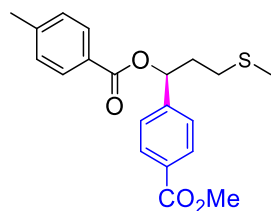

This compound was prepared according to the general procedure using methyl 4-bromobenzoate (32.3 mg, 0.15 mmol, 1.0 equiv) and 1-chloro-3-(methylthio)propyl 4-methylbenzoate (77.6 mg, 0.3 mmol, 2.0 equiv). The crude mixture was purified by flash column chromatograph to

afford **21** as a colorless oil (28.0 mg, 52% yield, 86% ee).

**Chiral HPLC** (CHIRALCEL OD-H), *i*PrOH-hexane 5/95, 1.0 mL/min, 240 nm,  $t_R$  (minor) = 12.132 min,  $t_R$  (major) = 8.675 min.

**$^1\text{H NMR}$  (600 MHz,  $\text{CDCl}_3$ )**  $\delta$  8.05 – 8.00 (m, 2H), 7.97 (d,  $J$  = 8.2 Hz, 2H), 7.48 (d,  $J$  = 8.3 Hz, 2H), 7.28 – 7.23 (m, 2H), 6.13 (dd,  $J$  = 8.0, 5.3 Hz, 1H), 3.90 (s, 3H), 2.59 – 2.52 (m, 2H), 2.42 (s, 3H), 2.38 – 2.32 (m, 1H), 2.20 – 2.13 (m, 1H), 2.10 (s, 3H).

**$^{13}\text{C NMR}$  (151 MHz,  $\text{CDCl}_3$ )**  $\delta$  166.7, 165.6, 145.3, 144.0, 129.9, 129.8, 129.7, 129.2, 127.1, 126.2, 74.6, 52.1, 36.0, 30.0, 21.7, 15.5.

**HRMS** (ESI) calculated for  $\text{C}_{21}\text{H}_{25}\text{O}_4\text{S}^+$  ( $[\text{M}+\text{H}]^+$ )  $m/z$  381.1131, found 381.1131.

$[\alpha]_{\text{D}}^{25} = +95$  ( $c$  0.50,  $\text{CHCl}_3$ ).

**(*S*)-1-(4-(Methoxycarbonyl)phenyl)-3-tosylpropyl 4-methylbenzoate (**22**)**

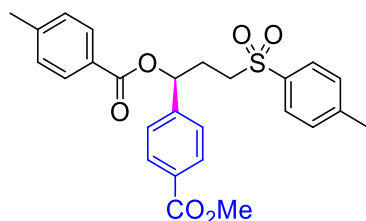

This compound was prepared according to the general procedure using methyl 4-bromobenzoate (32.3 mg, 0.15 mmol, 1.0 equiv) and 1-chloro-3-tosylpropyl 4-methylbenzoate (110.1 mg, 0.3 mmol, 2.0 equiv). The crude mixture was purified by flash column

chromatograph to afford **22** as an off-white solid (30.0 mg, 43% yield, 87% ee).

**Chiral HPLC** (CHIRALCEL OD-H), *i*PrOH-hexane 20/80, 1.0 mL/min, 230 nm,  $t_R$  (minor) = 31.406 min,  $t_R$  (major) = 20.392 min.

**$^1\text{H NMR}$  (600 MHz,  $\text{CDCl}_3$ )**  $\delta$  8.04 – 7.98 (m, 2H), 7.90 (d,  $J$  = 8.1 Hz, 2H), 7.75 (d,  $J$  = 8.2 Hz, 2H), 7.40 (d,  $J$  = 8.3 Hz, 2H), 7.34 (d,  $J$  = 8.3 Hz, 2H), 7.25 (d,  $J$  = 7.8 Hz, 2H), 6.05 (dd,  $J$  = 8.0, 5.0 Hz, 1H), 3.91 (s, 3H), 3.18 – 3.12 (m, 2H), 2.46 – 2.41 (m, 7H), 2.37 – 2.31 (m, 1H).

**$^{13}\text{C NMR}$  (151 MHz,  $\text{CDCl}_3$ )**  $\delta$  166.5, 165.3, 145.0, 144.4, 144.0, 135.7, 130.2, 130.1, 130.0, 129.7, 129.3, 128.0, 126.6, 126.0, 73.5, 52.6, 52.2, 29.6, 21.7, 21.6.

**HRMS** (ESI) calculated for  $\text{C}_{26}\text{H}_{26}\text{NaO}_6\text{S}^+$  ( $[\text{M}+\text{Na}]^+$ )  $m/z$  489.1343, found 489.1339.

**M.P.** 147.9 – 149.2 °C.

$[\alpha]_{\text{D}}^{25} = +30$  ( $c$  0.30,  $\text{CHCl}_3$ ).

**(3*R*,5*S*,7*R*,8*R*,9*S*,10*S*,12*S*,13*R*,14*S*,17*R*)-17-((2*R*,5*S*)-5-(4-(Methoxycarbonyl)phenyl)-5-((4-methyl benzoyl)oxy)pentan-2-yl)-10,13-dimethylhexadecahydro-1*H*-cyclopenta[*a*]phenanthrene-3,7,12-tr**



min,  $t_R$  (major) = 12.915 min.

**$^1\text{H NMR}$  (600 MHz,  $\text{CDCl}_3$ )**  $\delta$  8.09 (t,  $J = 1.8$  Hz, 1H), 8.01 – 7.93 (m, 3H), 7.60 (dt,  $J = 7.7, 1.6$  Hz, 1H), 7.42 (t,  $J = 7.7$  Hz, 1H), 7.26 – 7.21 (m, 2H), 5.96 – 5.90 (m, 1H), 3.91 (s, 3H), 2.41 (s, 3H), 2.14 – 2.04 (m, 1H), 2.01 – 1.91 (m, 1H), 0.96 (t,  $J = 7.4$  Hz, 3H).

**$^{13}\text{C NMR}$  (151 MHz,  $\text{CDCl}_3$ )**  $\delta$  166.9, 165.9, 143.7, 141.2, 131.1, 130.4, 129.7, 129.1, 129.0, 128.5, 127.6, 127.5, 77.2, 52.1, 29.5, 21.7, 9.9.

**HRMS** (ESI) calculated for  $\text{C}_{19}\text{H}_{20}\text{NaO}_4^+$  ( $[\text{M}+\text{Na}]^+$ )  $m/z$  335.1254, found 335.1249.

$[\alpha]_D^{25} = +45$  ( $c$  0.60,  $\text{CHCl}_3$ ).

#### But-3-en-1-yl (S)-4-(1-((4-methylbenzoyl)oxy)propyl)benzoate (25)

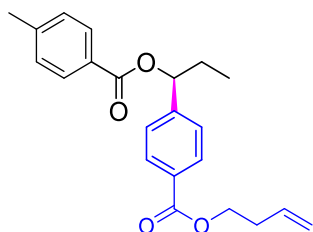

This compound was prepared according to the general procedure using but-3-en-1-yl 4-bromobenzoate (38.3 mg, 0.15 mmol, 1.0 equiv) and 1-chlorobutyl 4-methylbenzoate (63.8 mg, 0.3 mmol, 2.0 equiv). The crude mixture was purified by flash column chromatograph to afford **25** as a colorless oil (45.6 mg, 86% yield, 92% ee).

**Chiral HPLC** (CHIRALCEL OD-H),  $i\text{PrOH}$ -hexane 5/95, 0.5 mL/min, 240 nm,  $t_R$  (minor) = 20.135 min,  $t_R$  (major) = 18.901 min.

**$^1\text{H NMR}$  (400 MHz,  $\text{CDCl}_3$ )**  $\delta$  8.00 (dd,  $J = 15.2, 7.9$  Hz, 4H), 7.46 (d,  $J = 8.5$  Hz, 2H), 7.29 – 7.20 (m, 2H), 6.01 – 5.78 (m, 2H), 5.23 – 5.03 (m, 2H), 4.36 (t,  $J = 7.5$  Hz, 2H), 2.51 (q,  $J = 6.7$  Hz, 2H), 2.42 (s, 3H), 2.00 (m, 2H), 0.97 (t,  $J = 7.3$ , 3H).

**$^{13}\text{C NMR}$  (101 MHz,  $\text{CDCl}_3$ )**  $\delta$  166.2, 165.9, 145.9, 143.8, 134.0, 129.8, 129.7, 129.6, 129.1, 127.4, 126.2, 117.3, 77.0, 63.9, 33.1, 29.5, 21.7, 9.8.

**HRMS** (ESI) calculated for  $\text{C}_{22}\text{H}_{25}\text{O}_4^+$  ( $[\text{M}+\text{H}]^+$ )  $m/z$  353.1748, found 353.1754.

$[\alpha]_D^{25} = +53$  ( $c$  0.50,  $\text{CHCl}_3$ ).

#### (S)-1-(4-(Methoxy(methyl)carbamoyl)phenyl)propyl 4-methylbenzoate (26)

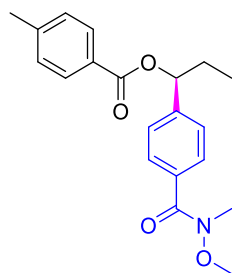

This compound was prepared according to the general procedure using 4-bromo-*N*-methoxy-*N*-methylbenzamide (36.6 mg, 0.15 mmol, 1.0 equiv) and 1-chloropropyl 4-methylbenzoate (63.8 mg, 0.3 mmol, 2.0 equiv). The crude mixture was purified by flash column chromatograph to afford **26** as a colorless oil (44.1 mg, 86% yield, 92% ee).



**Chiral HPLC** (CHIRALCEL OD-H), *i*PrOH-hexane 20/80, 0.5 mL/min, 240 nm,  $t_R$  (minor) = 12.460 min,  $t_R$  (major) = 13.452 min.

**$^1\text{H NMR}$  (400 MHz,  $\text{CDCl}_3$ )**  $\delta$  7.97 (d,  $J = 8.2$  Hz, 2H), 7.65 (d,  $J = 6.4$  Hz, 2H), 7.44 – 7.40 (m, 2H), 7.24 (d,  $J = 11.6$  Hz, 2H), 5.95 – 5.92 (m, 1H), 3.54 (s, 3H), 3.34(s, 3H), 2.41(s, 3H), 2.09 – 1.89 (m, 2H), 0.99 – 0.92 (m, 3H).

**$^{13}\text{C NMR}$  (101 MHz,  $\text{CDCl}_3$ )**  $\delta$  169.5, 165.8, 143.7, 143.3, 133.4, 129.6, 129.1, 128.4, 127.5, 126.0, 77.0, 61.1, 46.0, 29.5, 21.6, 9.8.

**HRMS** (ESI) calculated for  $\text{C}_{20}\text{H}_{23}\text{NNaO}_4^+$  ( $[\text{M}+\text{Na}]^+$ )  $m/z$  364.1520, found 364.1511.

$[\alpha]_{\text{D}}^{25} = +55$  ( $c$  0.50,  $\text{CHCl}_3$ ).

#### **(S)-1-(4-Formylphenyl)propyl 4-methylbenzoate (27)**

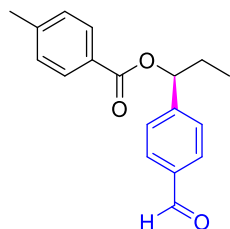

This compound was prepared according to the general procedure using 4-bromobenzaldehyde (27.8 mg, 0.15 mmol, 1.0 equiv) and 1-chloropropyl 4-methylbenzoate (63.8 mg, 0.3 mmol, 2.0 equiv). The crude mixture was purified by flash column chromatograph to afford **27** as an off-white solid (13.6 mg, 32% yield, 94% ee).

**Chiral HPLC** (CHIRALCEL OD-H), *i*PrOH-hexane 10/90, 0.5 mL/min, 240 nm,  $t_R$  (minor) = 13.709 min,  $t_R$  (major) = 14.756 min.

**$^1\text{H NMR}$  (600 MHz,  $\text{CDCl}_3$ )**  $\delta$  10.00 (s, 1H), 7.98 (d,  $J = 8.0$  Hz, 2H), 7.87 (d,  $J = 8.0$  Hz, 2H), 7.56 (d,  $J = 8.0$  Hz, 2H), 7.26 (d,  $J = 8.0$  Hz, 2H), 5.94 (dd,  $J = 7.4, 5.9$  Hz, 1H), 2.42 (s, 3H), 2.09 – 2.03 (m, 1H), 2.02 – 1.92 (m, 1H), 0.99 (t,  $J = 7.4$  Hz, 3H)..

**$^{13}\text{C NMR}$  (151 MHz,  $\text{CDCl}_3$ )**  $\delta$  191.8, 165.8, 147.7, 143.9, 135.9, 130.0, 129.7, 129.2, 127.3, 126.9, 77.0, 29.5, 21.7, 9.8.

**HRMS** (ESI) calculated for  $\text{C}_{18}\text{H}_{19}\text{O}_3^+$  ( $[\text{M}+\text{H}]^+$ )  $m/z$  283.1329, found 283.1315.

**M.P.** 49.1 – 50.2 °C.

$[\alpha]_{\text{D}}^{25} = +82$  ( $c$  0.50,  $\text{CHCl}_3$ ).

#### **(S)-1-(4-Benzoylphenyl)propyl 4-methylbenzoate (28)**

This compound was prepared according to the general procedure using (4-bromophenyl)(phenyl)-methanone (39.2 mg, 0.15 mmol, 1.0 equiv) and 1-chloropropyl 4-methylbenzoate (63.8 mg, 0.3 mmol,

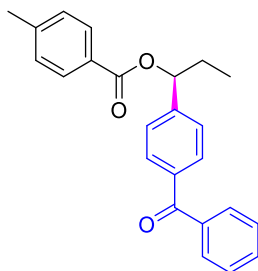

2.0 equiv). The crude mixture was purified by flash column chromatograph to afford **28** as a colorless oil (39.8 mg, 74% yield, 94% ee).

**Chiral HPLC** (CHIRALCEL OD-H), *i*PrOH-hexane 5/95, 0.5 mL/min, 240 nm,  $t_R$  (minor) = 16.655 min,  $t_R$  (major) = 24.302 min.

**$^1\text{H NMR}$  (600 MHz,  $\text{CDCl}_3$ )**  $\delta$ ,  $\delta$  8.00 (d,  $J$  = 8.2 Hz, 2H), 7.82 – 7.77 (m, 4H), 7.61 – 7.55 (m, 1H), 7.51 (d,  $J$  = 8.2 Hz, 2H), 7.49 – 7.45 (m, 2H), 7.29 – 7.23 (m, 2H), 5.97 (dd,  $J$  = 7.4, 6.0 Hz, 1H), 2.42 (s, 3H), 2.14 – 1.93 (m, 2H), 1.00 (t,  $J$  = 7.4 Hz, 3H).

**$^{13}\text{C NMR}$  (151 MHz,  $\text{CDCl}_3$ )**  $\delta$  196.2, 165.9, 145.4, 143.8, 137.5, 137.0, 132.4, 130.3, 130.0, 129.7, 129.1, 128.2, 127.4, 126.2, 77.1, 29.5, 21.7, 9.9.

$[\alpha]_D^{25}$  = +63 (*c* 0.50,  $\text{CHCl}_3$ ).

#### (*S*)-1-(4-(Trifluoromethyl)phenyl)propyl 4-methylbenzoate (**29**)

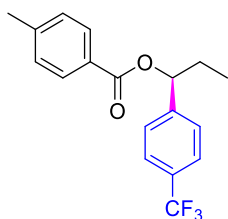

This compound was prepared according to the general procedure using 1-bromo-4-(trifluoromethyl)benzene (33.8 mg, 0.15 mmol, 1.0 equiv) and 1-chloropropyl 4-methylbenzoate (63.8 mg, 0.3 mmol, 2.0 equiv). The crude mixture was purified by flash column chromatograph to afford **29** as an off-white solid (32.0 mg, 66% yield, 87% ee).

**Chiral HPLC** (CHIRALCEL OD-H), *i*PrOH-hexane 2/98, 0.5 mL/min, 240 nm,  $t_R$  (minor) = 8.785 min,  $t_R$  (major) = 9.309 min.

**$^1\text{H NMR}$  (600 MHz,  $\text{CDCl}_3$ )**  $\delta$  8.00 – 7.95 (m, 2H), 7.60 (d,  $J$  = 8.1 Hz, 2H), 7.51 (d,  $J$  = 8.1 Hz, 2H), 7.26 (d,  $J$  = 8.0 Hz, 2H), 5.93 (dd,  $J$  = 7.5, 6.0 Hz, 1H), 2.42 (s, 3H), 2.12 – 2.02 (m, 1H), 2.00 – 1.91 (m, 1H), 0.98 (t,  $J$  = 7.4 Hz, 3H).

**$^{13}\text{C NMR}$  (151 MHz,  $\text{CDCl}_3$ )**  $\delta$  165.9, 144.8, 143.9, 129.9 (q,  $J$  = 32.5 Hz), 129.7, 129.1, 127.4, 126.6, 125.4 (q,  $J$  = 3.8 Hz), 124.1 (d,  $J$  = 272.0 Hz), 76.9, 29.6, 21.7, 9.8.

**$^{19}\text{F NMR}$  (565 MHz,  $\text{CDCl}_3$ )**  $\delta$  -62.55.

**HRMS** (ESI) calculated for  $\text{C}_{18}\text{H}_{17}\text{F}_3\text{O}_2^+$  ( $[\text{M}]^+$ )  $m/z$  322.1176, found 322.1166.

**M.P.** 54.5 – 55.5 °C.

$[\alpha]_D^{25}$  = +65 (*c* 0.30,  $\text{CHCl}_3$ ).

#### (*S*)-1-(4-(Methylsulfonyl)phenyl)propyl 4-methylbenzoate (**30**)

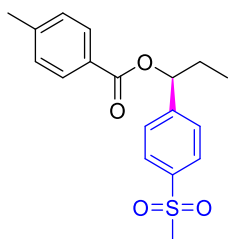

This compound was prepared according to the general procedure using 1-bromo-4-(methylsulfonyl)benzene (35.3 mg, 0.15 mmol, 1.0 equiv) and 1-chloropropyl 4-methylbenzoate (63.8 mg, 0.3 mmol, 2.0 equiv). The crude mixture was purified by flash column chromatograph to afford **30** as an off-white solid (46.0 mg, 92% yield, 94% ee).

**Chiral HPLC** (CHIRALCEL OD-H), *i*PrOH-hexane 20/80, 1.0 mL/min, 254 nm,  $t_R$  (minor) = 10.710 min,  $t_R$  (major) = 12.578 min.

**$^1\text{H NMR}$  (600 MHz,  $\text{CDCl}_3$ )**  $\delta$  8.02 – 7.96 (m, 2H), 7.94 – 7.89 (m, 2H), 7.61 – 7.57 (m, 2H), 7.29 – 7.24 (m, 2H), 5.94 (dd,  $J = 7.5, 5.9$  Hz, 1H), 3.03 (s, 3H), 2.42 (s, 3H), 2.12 – 2.02 (m, 1H), 2.00 – 1.94 (m, 1H), 0.99 (t,  $J = 7.4$  Hz, 3H).

**$^{13}\text{C NMR}$  (151 MHz,  $\text{CDCl}_3$ )**  $\delta$  165.8, 147.2, 144.1, 139.8, 129.6, 129.2, 127.6, 127.2, 127.1, 76.7, 44.5, 29.5, 21.7, 9.8.

**HRMS** (ESI) calculated for  $\text{C}_{18}\text{H}_{20}\text{NaO}_4\text{S}^+$  ( $[\text{M}+\text{Na}]^+$ )  $m/z$  355.0975, found 355.0970.

**M.P.** 109.5 – 110.7 °C.

$[\alpha]_{\text{D}}^{25} = +64$  ( $c$  0.50,  $\text{CHCl}_3$ ).

#### (*S*)-1-(4-(Diethoxyphosphoryl)phenyl)propyl 4-methylbenzoate (**31**)

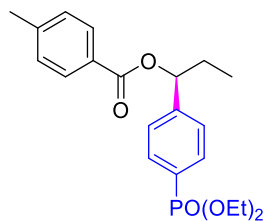

This compound was prepared according to the general procedure using diethyl (4-bromophenyl)phosphonate (44.0 mg, 0.15 mmol, 1.0 equiv) and 1-chloropropyl 4-methylbenzoate (63.8 mg, 0.3 mmol, 2.0 equiv). The crude mixture was purified by flash column chromatograph to afford **31** as a

colorless oil (52.2 mg, 89% yield, 89% ee).

**Chiral HPLC** (CHIRALCEL OD-H), *i*PrOH-hexane 20/80, 0.5 mL/min, 240 nm,  $t_R$  (minor) = 9.166 min,  $t_R$  (major) = 9.785 min.

**$^1\text{H NMR}$  (600 MHz,  $\text{CDCl}_3$ )**  $\delta$  7.97 (d,  $J = 8.0$  Hz, 2H), 7.78 (dd,  $J = 13.1, 8.0$  Hz, 2H), 7.48 (dd,  $J = 8.1, 3.9$  Hz, 2H), 7.25 (d,  $J = 8.0$  Hz, 2H), 5.93 – 5.91 (m, 1H), 4.18 – 4.02 (m, 4H), 2.41 (s, 3H), 2.04 (dq,  $J = 14.8, 7.4$  Hz, 1H), 1.97 – 1.90 (m, 1H), 1.31 (t,  $J = 7.0$  Hz, 6H), 0.96 (t,  $J = 7.4$  Hz, 3H).

**$^{13}\text{C NMR}$  (151 MHz,  $\text{CDCl}_3$ )**  $\delta$  165.8, 145.4 (d,  $J = 3.0$  Hz), 143.8, 132.0 (d,  $J = 10.4$  Hz), 129.6, 129.1, 127.7 (d,  $J = 189.1$  Hz), 127.4, 126.4 (d,  $J = 15.4$  Hz), 77.0, 62.1 (d,  $J = 5.4$  Hz), 29.5, 21.6, 16.3 (d,  $J = 6.6$  Hz), 9.8.

**HRMS** (ESI) calculated for  $\text{C}_{21}\text{H}_{27}\text{NaO}_5\text{P}^+$  ( $[\text{M}+\text{Na}]^+$ )  $m/z$  413.1489, found 413.1487.

$[\alpha]_{\text{D}}^{25} = +46$  (*c* 0.50, CHCl<sub>3</sub>).

**Methyl (*S*)-2-chloro-4-(1-((4-methylbenzoyl)oxy)propyl)benzoate (**32**)**

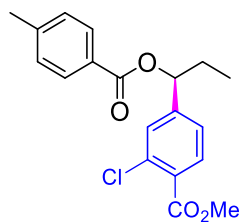

This compound was prepared according to the general procedure using methyl 4-bromo-2-chlorobenzoate (37.4 mg, 0.15 mmol, 1.0 equiv) and 1-chloropropyl 4-methylbenzoate (63.8 mg, 0.3 mmol, 2.0 equiv). The crude mixture was purified by flash column chromatograph to afford **32** as a colorless oil (27.1 mg, 52% yield, 94% ee).

**Chiral HPLC** (CHIRALCEL OD-H), *i*PrOH-hexane 2/98, 0.5 mL/min, 240 nm,  $t_{\text{R}}$  (minor) = 26.977 min,  $t_{\text{R}}$  (major) = 18.218 min.

**<sup>1</sup>H NMR (600 MHz, CDCl<sub>3</sub>)**  $\delta$  8.02 – 7.93 (m, 2H), 7.82 (d, *J* = 8.1 Hz, 1H), 7.48 (d, *J* = 1.7 Hz, 1H), 7.33 (dd, *J* = 8.1, 1.7 Hz, 1H), 7.26 (d, *J* = 8.0 Hz, 2H), 5.87 (dd, *J* = 7.4, 5.9 Hz, 1H), 3.91 (s, 3H), 2.42 (s, 3H), 2.08 – 1.89 (m, 2H), 0.97 (t, *J* = 7.4 Hz, 3H).

**<sup>13</sup>C NMR (151 MHz, CDCl<sub>3</sub>)**  $\delta$  165.8, 165.7, 146.1, 144.0, 134.0, 131.6, 129.6, 129.2, 129.1, 128.8, 127.2, 124.5, 76.2, 52.4, 29.4, 21.6, 9.7.

**HRMS** (ESI) calculated for C<sub>19</sub>H<sub>19</sub>ClNaO<sub>4</sub><sup>+</sup> ([M+Na]<sup>+</sup>) *m/z* 369.0865, found 369.0850.

$[\alpha]_{\text{D}}^{25} = +42$  (*c* 0.70, CHCl<sub>3</sub>).

**(*S*)-1-(1-Oxo-2,3-dihydro-1H-inden-4-yl)propyl 4-methylbenzoate (**33**)**

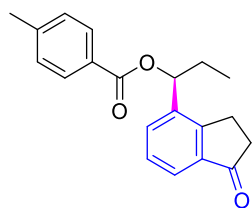

This compound was prepared according to the general procedure using 4-bromo-2,3-dihydro-1H-inden-1-one (31.7 mg, 0.15 mmol, 1.0 equiv) and 1-chloropropyl 4-methylbenzoate (63.8 mg, 0.3 mmol, 2.0 equiv). The crude mixture was purified by flash column chromatograph to afford **33** as an off-white solid (37.5 mg, 81% yield, 93% ee).

**Chiral HPLC** (CHIRALCEL OD-H), *i*PrOH-hexane 10/90, 0.5 mL/min, 240 nm,  $t_{\text{R}}$  (minor) = 14.864 min,  $t_{\text{R}}$  (major) = 15.865 min.

**<sup>1</sup>H NMR (600 MHz, CDCl<sub>3</sub>)**  $\delta$  7.99 – 7.94 (m, 2H), 7.70 (dd, *J* = 7.6, 1.1 Hz, 1H), 7.66 (dd, *J* = 7.5, 1.1 Hz, 1H), 7.39 (t, *J* = 7.5 Hz, 1H), 7.25 (d, *J* = 7.3 Hz, 2H), 6.04 (dd, *J* = 7.7, 6.1 Hz, 1H), 3.42 (ddd, *J* = 17.2, 7.3, 4.4 Hz, 1H), 3.16 (ddd, *J* = 17.3, 7.4, 4.6 Hz, 1H), 2.79 – 2.66 (m, 2H), 2.41 (s, 3H), 2.17 – 1.93 (m, 2H), 1.02 (t, *J* = 7.4 Hz, 3H).

**<sup>13</sup>C NMR (151 MHz, CDCl<sub>3</sub>)** δ 206.8, 165.9, 152.4, 143.9, 138.9, 137.3, 131.8, 129.6, 129.2, 127.9, 127.3, 123.3, 74.2, 36.1, 28.6, 24.4, 21.7, 10.0.

**HRMS** (ESI) calculated for C<sub>20</sub>H<sub>20</sub>NaO<sub>3</sub><sup>+</sup> ([M+Na]<sup>+</sup>) m/z 331.1305, found 331.1299.

**M.P.** 117.3 – 118.4 °C.

[α]<sub>D</sub><sup>25</sup> = +101 (c 0.50, CHCl<sub>3</sub>).

#### (S)-1-(4-Oxochroman-7-yl)propyl 4-methylbenzoate (**34**)

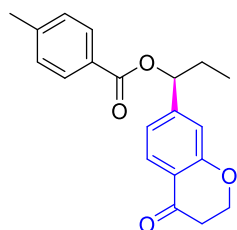

This compound was prepared according to the general procedure using 6-bromo-3,4-dihydronaphthalen-1(2H)-one (33.8 mg, 0.15 mmol, 1.0 equiv) and 1-chloropropyl 4-methylbenzoate (63.8 mg, 0.3 mmol, 2.0 equiv). The crude mixture was purified by flash column chromatograph to afford **34** as a colorless oil (38.9 mg, 80% yield, 94% ee).

**Chiral HPLC** (CHIRALCEL OD-H), *i*PrOH-hexane 10/90, 0.5 mL/min, 240 nm, *t*<sub>R</sub> (minor) = 21.856 min, *t*<sub>R</sub> (major) = 19.450 min.

**<sup>1</sup>H NMR (600 MHz, CDCl<sub>3</sub>)** δ 8.01 – 7.94 (m, 2H), 7.87 (d, *J* = 8.1 Hz, 1H), 7.26 (s, 2H), 7.04 (dd, *J* = 8.1, 1.6 Hz, 1H), 6.99 (d, *J* = 1.5 Hz, 1H), 5.85 (dd, *J* = 7.4, 5.8 Hz, 1H), 4.55 – 4.48 (m, 2H), 2.78 (dd, *J* = 7.0, 5.9 Hz, 2H), 2.41 (s, 3H), 2.05 – 1.90 (m, 2H), 0.98 (t, *J* = 7.4 Hz, 3H).

**<sup>13</sup>C NMR (101 MHz, CDCl<sub>3</sub>)** δ 191.4, 165.8, 161.8, 149.6, 143.9, 129.7, 129.1, 127.4, 127.3, 120.6, 119.3, 76.8, 67.0, 37.6, 29.4, 21.7, 9.8.

**HRMS** (ESI) calculated for C<sub>20</sub>H<sub>20</sub>NaO<sub>4</sub><sup>+</sup> ([M+Na]<sup>+</sup>) m/z 347.1254, found 347.1254.

[α]<sub>D</sub><sup>25</sup> = +55 (c 0.50, CHCl<sub>3</sub>).

#### (S)-1-(6-(Trifluoromethyl)pyridin-3-yl)propyl 4-methylbenzoate (**35**)

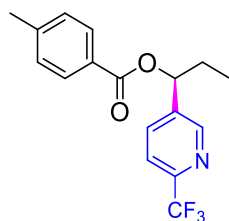

This compound was prepared according to the general procedure using 5-bromo-2-(trifluoromethyl)pyridine (33.9 mg, 0.15 mmol, 1.0 equiv) and 1-chloropropyl 4-methylbenzoate (63.8 mg, 0.3 mmol, 2.0 equiv). The crude mixture was purified by flash column chromatograph to afford **35** as a colorless oil (27.2 mg, 56% yield, 94% ee).

**Chiral HPLC** (CHIRALCEL OD-H), *i*PrOH-hexane 5/95, 0.3 mL/min, 240 nm, *t*<sub>R</sub> (minor) = 21.498 min, *t*<sub>R</sub> (major) = 22.362 min.

**<sup>1</sup>H NMR (600 MHz, CDCl<sub>3</sub>)** δ 8.79 (d, *J* = 2.1 Hz, 1H), 8.00 – 7.93 (m, 2H), 7.89 (dd, *J* = 8.1, 2.1 Hz, 1H), 7.67 (dd, *J* = 8.1, 0.8 Hz, 1H), 7.26 (d, *J* = 7.9 Hz, 2H), 5.98 (dd, *J* = 7.5, 6.0 Hz, 1H), 2.42 (s, 3H), 2.15 – 2.07 (m, 1H), 2.03 – 1.96 (m, 1H), 1.01 (t, *J* = 7.4 Hz, 3H).

**<sup>13</sup>C NMR (151 MHz, CDCl<sub>3</sub>)** δ 165.7, 148.4, 147.6 (q, *J* = 34.8 Hz), 144.2, 139.6, 135.3, 129.7, 129.2, 126.9, 121.4 (d, *J* = 274.1 Hz), 120.3 (q, *J* = 3.0 Hz), 74.7, 29.4, 21.7, 9.7.

**<sup>19</sup>F NMR (565 MHz, CDCl<sub>3</sub>)** δ –67.89.

**HRMS** (ESI) calculated for C<sub>17</sub>H<sub>16</sub>F<sub>3</sub>NNaO<sub>2</sub><sup>+</sup> ([M+Na]<sup>+</sup>) *m/z* 346.1026, found 346.1006.

[α]<sub>D</sub><sup>25</sup> = +35 (*c* 1.00, CHCl<sub>3</sub>).

### (*S*)-1-(2-(Trifluoromethyl)pyridin-4-yl)propyl 4-methylbenzoate (**36**)

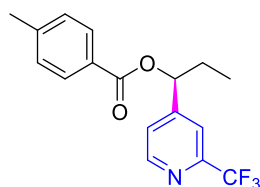

This compound was prepared according to the general procedure using 4-bromo-2-(trifluoromethyl)pyridine (30.8 mg, 0.15 mmol, 1.0 equiv) and 1-chloropropyl 4-methylbenzoate (63.8 mg, 0.3 mmol, 2.0 equiv). The crude mixture was purified by flash column chromatograph to afford **36** as a colorless oil (28.6 mg, 59% yield, 93% ee).

**Chiral HPLC** (CHIRALPAK AD-H), *i*PrOH-hexane 10/90 0.5 mL/min, 240 nm, *t*<sub>R</sub> (minor) = 10.015 min, *t*<sub>R</sub> (major) = 10.699 min.

**<sup>1</sup>H NMR (600 MHz, CDCl<sub>3</sub>)** δ 8.70 (d, *J* = 5.0 Hz, 1H), 8.02 – 7.95 (m, 2H), 7.68 – 7.65 (m, 1H), 7.49 (dd, *J* = 5.1, 1.5 Hz, 1H), 7.28 (d, *J* = 8.0 Hz, 2H), 5.94 (dd, *J* = 7.6, 5.5 Hz, 1H), 2.43 (s, 3H), 2.09 – 1.95 (m, 2H), 1.01 (t, *J* = 7.4 Hz, 3H).

**<sup>13</sup>C NMR (151 MHz, CDCl<sub>3</sub>)** δ 165.7, 151.9, 150.2, 148.6 (q, *J* = 34.6 Hz), 144.4, 129.7, 129.3, 126.7, 123.7, 121.4 (q, *J* = 274.3 Hz), 117.8 (q, *J* = 2.7 Hz), 75.5, 29.3, 21.7, 9.6.

**<sup>19</sup>F NMR (565 MHz, CDCl<sub>3</sub>)** δ –67.98.

**HRMS** (ESI) calculated for C<sub>17</sub>H<sub>16</sub>F<sub>3</sub>NNaO<sub>2</sub><sup>+</sup> ([M+Na]<sup>+</sup>) *m/z* 346.1026, found 346.1017.

[α]<sub>D</sub><sup>25</sup> = +82 (*c* 0.20, CHCl<sub>3</sub>).

### (*S*)-1-(6-Chloro-5-(trifluoromethyl)pyridin-3-yl)propyl 4-methylbenzoate (**37**)

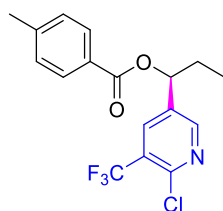

This compound was prepared according to the general procedure using 5-bromo-2-chloro-3-(trifluoromethyl)pyridine (39.1 mg, 0.15 mmol, 1.0 equiv) and 1-chloropropyl 4-methylbenzoate (63.8 mg, 0.3 mmol, 2.0 equiv). The

crude mixture was purified by flash column chromatograph to afford **37** as a colorless oil (28.0 mg, 52% yield, 93% ee).

**Chiral HPLC** (CHIRALPAK AD-H), *i*PrOH-hexane 10/90, 0.5 mL/min, 240 nm,  $t_R$  (minor) = 16.390 min,  $t_R$  (major) = 15.343 min.

**$^1\text{H NMR}$  (600 MHz,  $\text{CDCl}_3$ )**  $\delta$  8.62 (d,  $J = 2.3$  Hz, 1H), 8.02 (d,  $J = 2.3$  Hz, 1H), 7.94 (d,  $J = 8.1$  Hz, 2H), 7.30 – 7.24 (m, 2H), 5.94 (dd,  $J = 7.7, 6.0$  Hz, 1H), 2.42 (s, 3H), 2.11 (dq,  $J = 14.9, 7.4$  Hz, 1H), 1.97 (ddd,  $J = 13.9, 7.5, 6.2$  Hz, 1H), 1.02 (t,  $J = 7.4$  Hz, 3H).

**$^{13}\text{C NMR}$  (151 MHz,  $\text{CDCl}_3$ )**  $\delta$  165.7, 150.7, 148.3, 144.4, 135.6, 134.7 (q,  $J = 4.8$  Hz), 129.7, 129.3, 126.7, 125.2 (d,  $J = 33.3$  Hz), 122.0 (d,  $J = 273.1$  Hz), 74.0, 29.2, 21.7, 9.7.

**$^{19}\text{F NMR}$  (565 MHz,  $\text{CDCl}_3$ )**  $\delta$  -63.63.

**HRMS** (ESI) calculated for  $\text{C}_{17}\text{H}_{15}\text{ClF}_3\text{NNaO}_2^+$  ( $[\text{M}+\text{Na}]^+$ )  $m/z$  380.0636, found 380.0650.

$[\alpha]_{\text{D}}^{25} = +52$  (c 0.30,  $\text{CHCl}_3$ ).

#### (S)-1-(2-(Trifluoromethyl)pyrimidin-5-yl)propyl 4-methylbenzoate (**38**)

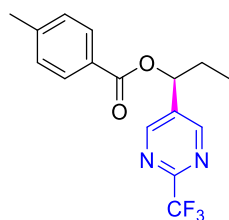

This compound was prepared according to the general procedure using methyl 5-bromo-2-(trifluoromethyl)pyrimidine (34.1 mg, 0.15 mmol, 1.0 equiv) and 1-chloropropyl 4-methylbenzoate (63.8 mg, 0.3 mmol, 2.0 equiv). The crude mixture was purified by flash column chromatograph to afford **38** as a colorless oil (18.5 mg, 38% yield, 91% ee).

**Chiral HPLC** (CHIRALPAK AD-H), *i*PrOH-hexane 10/90, 0.5 mL/min, 240 nm,  $t_R$  (minor) = 12.215 min,  $t_R$  (major) = 13.073 min.

**$^1\text{H NMR}$  (600 MHz,  $\text{CDCl}_3$ )**  $\delta$  8.94 (s, 2H), 8.05 – 7.85 (m, 2H), 7.27 (d,  $J = 8.6$  Hz, 2H), 5.98 (dd,  $J = 7.7, 5.9$  Hz, 1H), 2.43 (s, 3H), 2.20 – 2.09 (m, 1H), 2.07 – 1.98 (m, 1H), 1.05 (t,  $J = 7.4$  Hz, 3H).

**$^{13}\text{C NMR}$  (151 MHz,  $\text{CDCl}_3$ )**  $\delta$  165.7, 156.2, 156.2 (q,  $J = 36.2$  Hz), 144.6, 136.3, 129.7, 129.3, 126.4, 119.5 (q,  $J = 274.8$  Hz), 72.8, 29.1, 21.7, 9.6.

**$^{19}\text{F NMR}$  (565 MHz,  $\text{CDCl}_3$ )**  $\delta$  -70.27.

**HRMS** (ESI) calculated for  $\text{C}_{16}\text{H}_{16}\text{F}_3\text{N}_2\text{O}_2^+$  ( $[\text{M}+\text{H}]^+$ )  $m/z$  325.1159, found 325.1145.

$[\alpha]_{\text{D}}^{25} = +26$  (c 0.20,  $\text{CHCl}_3$ ).

#### (S)-1-(2-Chloropyrimidin-5-yl)propyl 4-methylbenzoate (**39**)

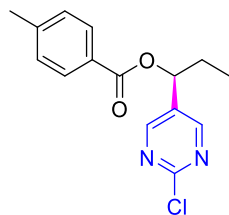

This compound was prepared according to the general procedure using 5-bromo-2-chloropyrimidine (29.0 mg, 0.15 mmol, 1.0 equiv) and 1-chloropropyl 4-methylbenzoate (63.8 mg, 0.3 mmol, 2.0 equiv). The crude mixture was purified by flash column chromatograph to afford **39** as an off-white solid (21.8 mg, 50% yield, 91% ee).

**Chiral HPLC** (CHIRALPAK IC-H), *i*PrOH-hexane 5/95, 0.5 mL/min, 240 nm,  $t_R$  (minor) = 20.690 min,  $t_R$  (major) = 19.202 min.

**$^1\text{H NMR}$  (400 MHz,  $\text{CDCl}_3$ )**  $\delta$  8.68 (s, 2H), 7.92 (d,  $J = 6.8$  Hz, 2H), 7.27 – 7.24 (m, 2H), 5.91 – 5.88 (m, 1H), 2.42 (s, 3H), 2.19 – 2.07 (m, 1H), 2.04 – 1.93 (M, 1H), 1.02 (t,  $J = 7.4$  Hz, 3H).

**$^{13}\text{C NMR}$  (101 MHz,  $\text{CDCl}_3$ )**  $\delta$  165.8, 160.9, 158.1, 144.4, 132.7, 129.7, 129.3, 126.6, 72.6, 28.9, 21.7, 9.7.

**HRMS** (ESI) calculated for  $\text{C}_{15}\text{H}_{15}\text{ClN}_2\text{NaO}_2^+$  ( $[\text{M}+\text{Na}]^+$ )  $m/z$  313.0715, found 313.0722

**M.P.** 111.4 – 111.9 °C.

$[\alpha]_D^{25} = +41$  ( $c$  0.50,  $\text{CHCl}_3$ ).

**(S)-1-(4-(4-((1-Isopropoxy-2-methyl-1-oxopropan-2-yl)oxy)benzoyl)phenyl)propyl 4-methylbenzoate (40)**

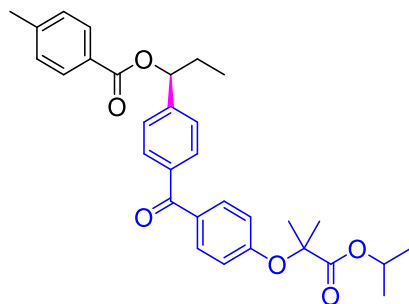

This compound was prepared according to the general procedure using isopropyl 2-(4-(4-bromobenzoyl)-phenoxy)-2-methylpropanoate (60.8 mg, 0.15 mmol, 1.0 equiv) and 1-chloropropyl 4-methylbenzoate (63.8 mg, 0.3 mmol, 2.0 equiv). The crude mixture was purified by flash column chromatograph to afford **40** as a colorless oil (58.8 mg, 78% yield, 92% ee).

**Chiral HPLC** (CHIRALCEL OD-H), *i*PrOH-hexane 10/90, 0.5 mL/min, 240 nm,  $t_R$  (minor) = 12.641 min,  $t_R$  (major) = 14.731 min.

**$^1\text{H NMR}$  (600 MHz,  $\text{CDCl}_3$ )**  $\delta$  7.99 (d,  $J = 8.1$  Hz, 2H), 7.82 – 7.70 (m, 4H), 7.49 (d,  $J = 8.1$  Hz, 2H), 7.25 (d,  $J = 6.2$  Hz, 2H), 6.93 – 6.77 (m, 2H), 5.95 (dd,  $J = 7.4, 6.0$  Hz, 1H), 5.09 – 5.05 (M, 1H), 2.41 (s, 3H), 2.14 – 1.93 (m, 2H), 1.65 (s, 6H), 1.19 (d,  $J = 6.2$  Hz, 6H), 0.99 (t,  $J = 7.4$  Hz, 3H).

**$^{13}\text{C NMR}$  (101 MHz,  $\text{CDCl}_3$ )**  $\delta$  195.0, 173.1, 165.9, 159.5, 144.9, 143.8, 137.5, 132.0, 130.4, 129.9, 129.6, 129.4, 129.1, 126.1, 117.1, 79.3, 77.1, 69.2, 29.5, 25.3, 25.3, 21.6, 21.5, 9.8.



**HRMS** (ESI) calculated for  $C_{31}H_{34}NaO_6^+$  ( $[M+Na]^+$ )  $m/z$  525.2248, found 525.2228.

$[\alpha]_D^{25} = +57$  ( $c$  0.50,  $CHCl_3$ ).

**(S)-1-(4-((2-(Diethylamino)ethoxy)carbonyl)phenyl)propyl 4-methylbenzoate (41)**

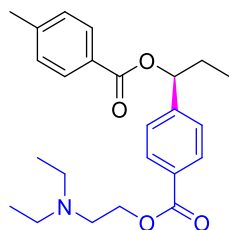

This compound was prepared according to the general procedure using 2-(diethylamino)ethyl 4-bromobenzoate (45.0 mg, 0.15 mmol, 1.0 equiv) and 1-chloropropyl 4-methylbenzoate (63.8 mg, 0.3 mmol, 2.0 equiv). The crude mixture was purified by flash column chromatograph to afford **41** as a colorless oil (45.9 mg, 77% yield, 92% ee).

**Chiral HPLC** (CHIRALPAK IC-H), *i*PrOH-hexane 10/90, 0.5 mL/min, 240 nm,  $t_R$  (minor) = 21.424 min,  $t_R$  (major) = 22.681 min.

**$^1H$  NMR (600 MHz,  $CDCl_3$ )**  $\delta$  8.05 – 8.00 (m, 2H), 8.00 – 7.94 (m, 2H), 7.46 (d,  $J = 8.3$  Hz, 2H), 7.25 (d,  $J = 8.0$  Hz, 2H), 5.93 (dd,  $J = 7.4, 6.0$  Hz, 1H), 4.38 (t,  $J = 6.2$  Hz, 2H), 2.84 (t,  $J = 6.2$  Hz, 2H), 2.62 (q,  $J = 7.1$  Hz, 4H), 2.41 (s, 3H), 2.09 – 1.91 (m, 2H), 1.06 (t,  $J = 7.1$  Hz, 6H), 0.96 (t,  $J = 7.4$  Hz, 3H).

**$^{13}C$  NMR (151 MHz,  $CDCl_3$ )**  $\delta$  166.3, 165.8, 145.8, 143.8, 129.8, 129.7, 129.6, 129.1, 127.4, 126.2, 77.0, 63.4, 51.0, 47.8, 29.5, 21.7, 12.1, 9.8.

**HRMS** (ESI) calculated for  $C_{24}H_{31}NNaO_4^+$  ( $[M+Na]^+$ )  $m/z$  420.2146, found 420.2143.

$[\alpha]_D^{25} = +48$  ( $c$  0.50,  $CHCl_3$ ).

**(S)-1-(4-(5-Methoxy-3-(2-methoxy-2-oxoethyl)-2-methyl-1H-indole-1-carbonyl)phenyl)propyl 4-methylbenzoate (42)**

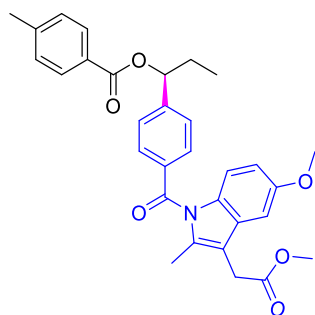

This compound was prepared according to the general procedure using methyl 2-(1-(4-bromobenzoyl)-5-methoxy-2-methyl-1H-indol-3-yl)-acetate (62.5 mg, 0.15 mmol, 1.0 equiv) and 1-chloropropyl 4-methylbenzoate (63.8 mg, 0.3 mmol, 2.0 equiv). The crude mixture was purified by flash column chromatograph to afford **42** as an off-white solid (66.3 mg, 86% yield, 93% ee).

**Chiral HPLC** (CHIRALCEL OD-H), *i*PrOH-hexane 20/80, 0.5 mL/min, 240 nm,  $t_R$  (minor) = 23.605 min,  $t_R$  (major) = 27.547 min.

**<sup>1</sup>H NMR (600 MHz, CDCl<sub>3</sub>)** δ 8.00 (d, *J* = 8.3 Hz, 2H), 7.73 – 7.66 (m, 2H), 7.51 (d, *J* = 8.3 Hz, 2H), 7.27 (d, *J* = 8.0 Hz, 2H), 6.96 (d, *J* = 2.6 Hz, 1H), 6.91 (d, *J* = 9.0 Hz, 1H), 6.65 (dd, *J* = 9.0, 2.6 Hz, 1H), 6.00 (dd, *J* = 7.4, 5.8 Hz, 1H), 3.83 (s, 3H), 3.70 (s, 3H), 3.67 (s, 2H), 2.43 (s, 3H), 2.35 (s, 3H), 2.13 – 1.94 (m, 2H), 1.00 (t, *J* = 7.4 Hz, 3H).

**<sup>13</sup>C NMR (151 MHz, CDCl<sub>3</sub>)** δ 171.4, 169.0, 165.8, 155.9, 145.9, 143.9, 135.9, 134.9, 130.9, 130.5, 129.9, 129.7, 129.1, 127.4, 126.6, 115.0, 112.1, 111.5, 101.2, 76.8, 55.7, 52.1, 30.1, 29.6, 21.7, 13.3, 9.7.

**HRMS** (ESI) calculated for C<sub>31</sub>H<sub>32</sub>NO<sub>6</sub><sup>+</sup> ([M+H]<sup>+</sup>) *m/z* 514.2225, found 514.2220.

**M.P.** 108.9 – 109.6 °C.

[α]<sub>D</sub><sup>25</sup> = +51 (*c* 0.50, CHCl<sub>3</sub>).

#### **(S)-1-(4-Methoxyphenyl)propyl 4-methylbenzoate (43)**

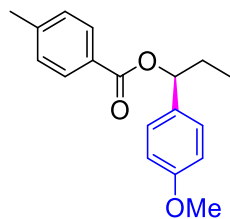

This compound was prepared according to the general procedure using 1-iodo-4-methoxybenzene (35.1 mg, 0.15 mmol, 1.0 equiv) and 1-chloropropyl 4-methylbenzoate (63.8 mg, 0.3 mmol, 2.0 equiv). The crude mixture was purified by flash column chromatograph to afford **43** as a colorless oil (36.3 mg,

85% yield, 92% ee).

**Chiral HPLC** (CHIRALPAK IC-H), *i*PrOH-hexane 5/95, 0.5 mL/min, 240 nm, *t*<sub>R</sub> (minor) = 14.807 min, *t*<sub>R</sub> (major) = 16.387 min.

**<sup>1</sup>H NMR (600 MHz, CDCl<sub>3</sub>)** δ 7.99 – 7.94 (m, 2H), 7.37 – 7.32 (m, 2H), 7.25 – 7.21 (m, 2H), 6.91 – 6.86 (m, 2H), 5.86 (t, *J* = 6.9 Hz, 1H), 3.79 (s, 3H), 2.40 (s, 3H), 2.09 – 2.03 (m, 1H), 1.96 – 1.90 (m, 1H), 0.95 (t, *J* = 7.4 Hz, 3H).

**<sup>13</sup>C NMR (151 MHz, CDCl<sub>3</sub>)** δ 166.0, 159.1, 143.4, 132.8, 129.6, 129.0, 127.9, 127.9, 113.7, 77.4, 55.2, 29.4, 21.6, 10.0.

**HRMS** (ESI) calculated for C<sub>18</sub>H<sub>20</sub>NaO<sub>3</sub><sup>+</sup> ([M+Na]<sup>+</sup>) *m/z* 307.1305, found 307.1310.

[α]<sub>D</sub><sup>25</sup> = +34 (*c* 1.00, CHCl<sub>3</sub>).

#### **(S)-1-(3-Methoxyphenyl)propyl 4-methylbenzoate (44)**

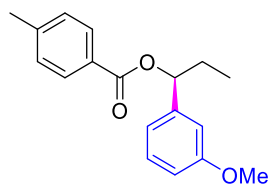

This compound was prepared according to the general procedure using 1-iodo-3-methoxybenzene (35.1 mg, 0.15 mmol, 1.0 equiv) and 1-chloropropyl 4-methylbenzoate (63.8 mg, 0.3 mmol, 2.0 equiv). The crude mixture was purified by flash column chromatograph to afford **44** as a colorless oil (35.5 mg, 83% yield, 92% ee).

**Chiral HPLC** (CHIRALCEL OD-H), *i*PrOH-hexane 2/98, 0.50 mL/min, 240 nm,  $t_R$  (minor) = 13.735 min,  $t_R$  (major) = 12.642 min.

**$^1\text{H NMR}$  (600 MHz,  $\text{CDCl}_3$ )**  $\delta$  8.00 – 7.95 (m, 2H), 7.28 – 7.22 (m, 3H), 6.99 (dt,  $J = 7.6, 1.3$  Hz, 1H), 6.95 (t,  $J = 2.1$  Hz, 1H), 6.83 – 6.81 (m, 1H), 5.88 (dd,  $J = 7.4, 6.1$  Hz, 1H), 3.80 (s, 3H), 2.41 (s, 3H), 2.08 – 2.01 (m, 1H), 1.98 – 1.90 (m, 1H), 0.96 (t,  $J = 7.4$ , 3H).

**$^{13}\text{C NMR}$  (151 MHz,  $\text{CDCl}_3$ )**  $\delta$  165.9, 159.6, 143.5, 142.4, 129.7, 129.4, 129.0, 127.8, 118.8, 112.9, 112.3, 77.5, 55.2, 29.6, 21.6, 9.9.

**HRMS** (ESI) calculated for  $\text{C}_{18}\text{H}_{20}\text{NaO}_3^+$  ( $[\text{M}+\text{Na}]^+$ )  $m/z$  307.1305, found 307.1308.

$[\alpha]_D^{25} = +53$  ( $c$  0.60,  $\text{CHCl}_3$ ).

#### (*S*)-1-(4-(Methylthio)phenyl)propyl 4-methylbenzoate (**45**)

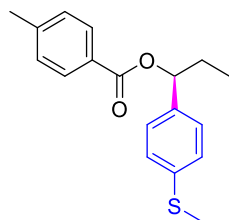

This compound was prepared according to the general procedure using (4-iodophenyl)(methyl)sulfane (37.5 mg, 0.15 mmol, 1.0 equiv) and 1-chloropropyl 4-methylbenzoate (63.8 mg, 0.3 mmol, 2.0 equiv). The crude mixture was purified by flash column chromatograph to afford **45** as a colorless oil (38.8 mg, 86% yield, 93% ee).

**Chiral HPLC** (CHIRALPAK IC-H), *i*PrOH-hexane 5/95, 0.5 mL/min, 254 nm,  $t_R$  (minor) = 19.187 min,  $t_R$  (major) = 22.205 min.

**$^1\text{H NMR}$  (400 MHz,  $\text{CDCl}_3$ )**  $\delta$  7.96 (d,  $J = 7.2$  Hz, 2H), 7.35 – 7.32 (m, 2H), 7.25 – 7.21 (m, 4H), 5.86 (d,  $J = 6.1$  Hz, 1H), 2.47 (s, 3H), 2.41 (s, 3H), 2.11 – 2.00 (m, 1H), 1.93 (q,  $J = 6.9$  Hz, 1H), 0.95 (t,  $J = 7.4$  Hz, 3H).

**$^{13}\text{C NMR}$  (101 MHz,  $\text{CDCl}_3$ )**  $\delta$  165.9, 143.6, 137.9, 137.6, 129.6, 129.0, 127.7, 127.0, 126.6, 77.3, 29.4, 21.6, 15.8, 9.9.

**HRMS** (ESI) calculated for  $\text{C}_{18}\text{H}_{20}\text{NaO}_2\text{S}^+$  ( $[\text{M}+\text{Na}]^+$ )  $m/z$  323.1077, found 323.1072.

$[\alpha]_D^{25} = +44$  ( $c$  1.00,  $\text{CHCl}_3$ ).

**(S)-1-(4-Chlorophenyl)propyl 4-methylbenzoate (46)**

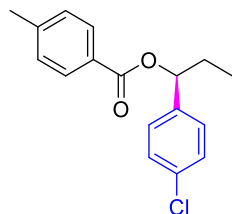

This compound was prepared according to the general procedure using 1-chloro-4-iodobenzene (35.8 mg, 0.15 mmol, 1.0 equiv) and 1-chloropropyl 4-methylbenzoate (63.8 mg, 0.3 mmol, 2.0 equiv). The crude mixture was purified by flash column chromatograph to afford **46** as an off-white solid (37.4 mg, 86% yield, 92% ee).

**Chiral HPLC** (CHIRALCEL OD-H), *i*PrOH-hexane 2/98, 0.5 mL/min, 240 nm,  $t_R$  (minor) = 10.086 min,  $t_R$  (major) = 10.628 min.

**$^1\text{H NMR}$  (600 MHz,  $\text{CDCl}_3$ )**  $\delta$  7.96 (d,  $J = 8.0$  Hz, 2H), 7.37 – 7.29 (m, 4H), 7.24 (d,  $J = 7.9$  Hz, 2H), 5.86 (t,  $J = 6.8$  Hz, 1H), 2.41 (s, 3H), 2.04 (dq,  $J = 14.7, 7.3$  Hz, 1H), 1.92 (dt,  $J = 13.9, 7.1$  Hz, 1H), 0.96 (t,  $J = 7.4$  Hz, 3H).

**$^{13}\text{C NMR}$  (151 MHz,  $\text{CDCl}_3$ )**  $\delta$  165.9, 143.7, 139.3, 133.5, 129.6, 129.1, 128.6, 127.8, 127.5, 76.9, 29.5, 21.7, 9.9.

**HRMS** (ESI) calculated for  $\text{C}_{17}\text{H}_{17}\text{ClNaO}_2^+$  ( $[\text{M}+\text{Na}]^+$ )  $m/z$  311.0810, found 311.0808.

**M.P.** 64.5 – 65.8 °C.

$[\alpha]_D^{25} = +33$  ( $c$  1.00,  $\text{CHCl}_3$ ).

**(S)-1-(4-(4,4,5,5-Tetramethyl-1,3,2-dioxaborolan-2-yl)phenyl)propyl 4-methylbenzoate (47)**

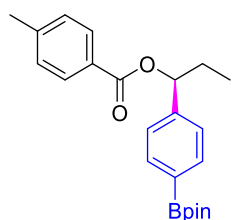

This compound was prepared according to the general procedure using 2-(4-iodophenyl)-4,4,5,5-tetramethyl-1,3,2-dioxaborolane (49.5 mg, 0.15 mmol, 1.0 equiv) and 1-chloropropyl 4-methylbenzoate (63.8 mg, 0.3 mmol, 2.0 equiv). The crude mixture was purified by flash column chromatograph to afford **47** as a colorless oil (31.4 mg, 55 % yield, 92% ee).

**Chiral HPLC** (CHIRALPAK IC-H), *i*PrOH-hexane 5/95, 0.5 mL/min, 240 nm,  $t_R$  (minor) = 11.851 min,  $t_R$  (major) = 10.320 min.

**$^1\text{H NMR}$  (600 MHz,  $\text{CDCl}_3$ )**  $\delta$  7.97 (d,  $J = 8.2$  Hz, 2H), 7.80 (d,  $J = 8.0$  Hz, 2H), 7.41 (d,  $J = 8.0$  Hz, 2H), 7.24 (d,  $J = 8.0$  Hz, 2H), 5.90 (dd,  $J = 7.3, 6.1$  Hz, 1H), 2.41 (s, 3H), 2.08 – 2.02 (m, 1H), 1.98 – 1.92 (m, 1H), 1.33 (s, 12H), 0.95 (t,  $J = 7.4$  Hz, 3H).

**<sup>13</sup>C NMR (151 MHz, CDCl<sub>3</sub>)** δ 165.9, 143.8, 143.5, 134.9, 129.6, 129.0, 127.7, 125.7, 83.7, 77.6, 29.5, 24.8, 24.8, 21.6, 9.9.

**HRMS** (ESI) calculated for C<sub>23</sub>H<sub>29</sub>BNaO<sub>4</sub><sup>+</sup> ([M+Na]<sup>+</sup>) m/z 403.2052, found 403.2062.

[α]<sub>D</sub><sup>25</sup> = +44 (c 0.30, CHCl<sub>3</sub>).

**(S)-1-(4-((tert-Butoxycarbonyl)amino)phenyl)propyl 4-methylbenzoate (48)**

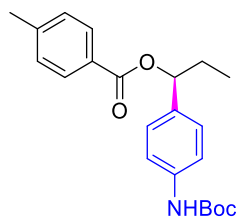

This compound was prepared according to the general procedure using *tert*-butyl (4-iodophenyl)carbamate (47.9 mg, 0.15 mmol, 1.0 equiv) and 1-chloropropyl 4-methylbenzoate (63.8 mg, 0.3 mmol, 2.0 equiv). The crude mixture was purified by flash column chromatograph to afford **48** as an

off-white solid (39.9 mg, 72% yield, 92% ee).

**Chiral HPLC** (CHIRALCEL OD-H), *i*PrOH-hexane 10/90, 0.5 mL/min, 240 nm, *t*<sub>R</sub> (minor) = 12.722 min, *t*<sub>R</sub> (major) = 23.701 min.

**<sup>1</sup>H NMR (600 MHz, CDCl<sub>3</sub>)** δ 7.95 (d, *J* = 8.2 Hz, 2H), 7.33 (s, 4H), 7.23 (d, *J* = 8.0 Hz, 2H), 6.48 (s, 1H), 5.85 (t, *J* = 6.8 Hz, 1H), 2.40 (s, 3H), 2.07 – 2.01 (m, 1H), 1.97 – 1.86 (m, 1H), 1.51 (s, 9H), 0.94 (t, *J* = 7.4 Hz, 3H).

**<sup>13</sup>C NMR (151 MHz, CDCl<sub>3</sub>)** δ 166.0, 152.7, 143.5, 137.9, 135.3, 129.6, 129.0, 127.8, 127.3, 118.5, 80.5, 77.4, 29.4, 28.3, 21.6, 9.9.

**HRMS** (ESI) calculated for C<sub>22</sub>H<sub>27</sub>NNaO<sub>4</sub><sup>+</sup> ([M+Na]<sup>+</sup>) m/z 392.1833, found 392.1825.

**M.P.** 106.1 – 106.9 °C.

[α]<sub>D</sub><sup>25</sup> = +24 (c 0.50, CHCl<sub>3</sub>).

**(S)-1-(4-(2-Hydroxyethyl)phenyl)propyl 4-methylbenzoate (49)**

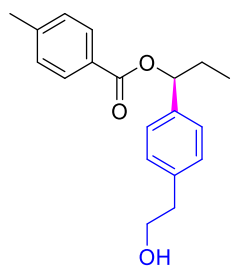

This compound was prepared according to the general procedure using 2-(4-iodophenyl)ethan-1-ol (37.2 mg, 0.15 mmol, 1.0 equiv) and 1-chloropropyl 4-methylbenzoate (63.8 mg, 0.3 mmol, 2.0 equiv). The crude mixture was purified by flash column chromatograph to afford **49** as a colorless oil (31.8 mg, 71% yield, 92% ee).

**Chiral HPLC** (CHIRALPAK IC-H), *i*PrOH-hexane 10/90, 0.5 mL/min, 240 nm, *t*<sub>R</sub> (minor) = 26.157 min, *t*<sub>R</sub> (major) = 25.058 min.

**<sup>1</sup>H NMR (600 MHz, CDCl<sub>3</sub>)** δ 8.03 – 7.93 (m, 2H), 7.39 – 7.33 (m, 2H), 7.25 – 7.18 (m, 4H), 5.88 (dd, *J* = 7.5, 6.1 Hz, 1H), 3.84 (t, *J* = 6.5 Hz, 2H), 2.85 (t, *J* = 6.6 Hz, 2H), 2.41 (s, 3H), 2.06 (dt, *J* = 13.8, 7.4 Hz, 1H), 1.97 – 1.89 (m, 1H), 0.96 (t, *J* = 7.4 Hz, 3H).

**<sup>13</sup>C NMR (151 MHz, CDCl<sub>3</sub>)** δ 166.0, 143.5, 139.0, 138.0, 129.6, 129.0, 129.0, 127.8, 126.7, 77.5, 63.5, 38.8, 29.5, 21.6, 10.0.

**HRMS** (ESI) calculated for C<sub>19</sub>H<sub>22</sub>NaO<sub>3</sub><sup>+</sup> ([M+Na]<sup>+</sup>) *m/z* 321.1462, found 321.1464.

[α]<sub>D</sub><sup>25</sup> = +47 (*c* 0.30, CHCl<sub>3</sub>).

### **(S)-1-(Benzo[d][1,3]dioxol-5-yl)propyl 4-methylbenzoate (50)**

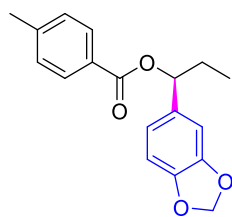

This compound was prepared according to the general procedure using 5-iodobenzo[d][1,3]dioxole (37.2 mg, 0.15 mmol, 1.0 equiv) and 1-chloropropyl 4-methylbenzoate (63.8 mg, 0.3 mmol, 2.0 equiv). The crude mixture was purified by flash column chromatograph to afford **50** as a colorless oil (31.8 mg, 71% yield, 91% ee).

**Chiral HPLC** (CHIRALCEL OD-H), *i*PrOH-hexane 2/98, 0.5 mL/min, 240 nm, *t*<sub>R</sub> (minor) = 15.709 min, *t*<sub>R</sub> (major) = 13.756 min.

**<sup>1</sup>H NMR (600 MHz, CDCl<sub>3</sub>)** δ 7.98 – 7.93 (m, 2H), 7.25 – 7.20 (m, 2H), 6.91 (d, *J* = 1.7 Hz, 1H), 6.88 (dd, *J* = 8.0, 1.7 Hz, 1H), 6.77 (d, *J* = 8.0 Hz, 1H), 5.96–5.90 (m, 2H), 5.80 (t, *J* = 6.9 Hz, 1H), 2.40 (s, 3H), 2.07 – 1.99 (m, 1H), 1.92 – 1.85 (m, 1H), 0.94 (t, *J* = 7.4 Hz, 3H).

**<sup>13</sup>C NMR (151 MHz, CDCl<sub>3</sub>)** δ 165.9, 147.7, 147.1, 143.5, 134.7, 129.6, 129.0, 127.8, 120.3, 108.1, 106.9, 101.0, 77.6, 29.5, 21.6, 10.0.

**HRMS** (ESI) calculated for C<sub>18</sub>H<sub>18</sub>NaO<sub>4</sub><sup>+</sup> ([M+Na]<sup>+</sup>) *m/z* 321.1098, found 321.1090.

[α]<sub>D</sub><sup>25</sup> = +22 (*c* 0.30, CHCl<sub>3</sub>).

### ***tert*-Butyl (S)-6-(1-((4-methylbenzoyl)oxy)propyl)-1*H*-indole-1-carboxylate (51)**

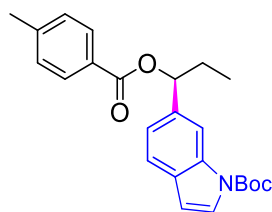

This compound was prepared according to the general procedure using *tert*-butyl 6-iodo-1*H*-indole-1-carboxylate (51.5 mg, 0.15 mmol, 1.0 equiv) and 1-chloropropyl 4-methylbenzoate (63.8 mg, 0.3 mmol, 2.0 equiv). The crude mixture was purified by flash column chromatograph to afford **51** as a colorless oil (40.2 mg, 68% yield, 90% ee)

**Chiral HPLC** (CHIRALPAK IC-H), *i*PrOH-hexane 5/95, 0.5 mL/min, 240 nm,  $t_R$  (minor) = 13.526 min,  $t_R$  (major) = 21.453 min.

**$^1\text{H NMR}$  (600 MHz,  $\text{CDCl}_3$ )**  $\delta$  8.24 (s, 1H), 8.03 – 7.96 (m, 2H), 7.58 (d,  $J$  = 3.7 Hz, 1H), 7.52 (d,  $J$  = 8.1 Hz, 1H), 7.31 (dd,  $J$  = 8.1, 1.5 Hz, 1H), 7.23 (d,  $J$  = 8.0 Hz, 2H), 6.54 (d,  $J$  = 3.7 Hz, 1H), 6.01 (t,  $J$  = 6.9 Hz, 1H), 2.40 (s, 3H), 2.19 – 2.11 (m, 1H), 2.01 (tt,  $J$  = 13.8, 7.4 Hz, 1H), 1.67 (s, 9H), 0.99 (t,  $J$  = 7.4 Hz, 3H).

**$^{13}\text{C NMR}$  (151 MHz,  $\text{CDCl}_3$ )**  $\delta$  166.0, 149.7, 143.4, 137.0, 135.1, 130.3, 129.7, 129.0, 127.9, 126.3, 121.4, 120.8, 113.5, 107.1, 83.7, 78.4, 29.9, 28.2, 21.6, 10.2.

**HRMS** (ESI) calculated for  $\text{C}_{24}\text{H}_{27}\text{NNaO}_4^+$  ( $[\text{M}+\text{Na}]^+$ )  $m/z$  416.1833, found 416.1840.

$[\alpha]_{\text{D}}^{25} = +40$  ( $c$  1.00,  $\text{CHCl}_3$ ).

#### **(S)-1-(2-Methoxyquinolin-6-yl)propyl 4-methylbenzoate (52)**

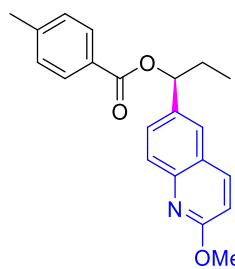

This compound was prepared according to the general procedure using 6-iodo-2-methoxyquinoline (42.8 mg, 0.15 mmol, 1.0 equiv) and 1-chloropropyl 4-methylbenzoate (63.8 mg, 0.3 mmol, 2.0 equiv). The crude mixture was purified by flash column chromatograph to afford **52** as an off-white solid (25.7 mg, 51% yield, 93% ee).

**Chiral HPLC** (CHIRALCEL OD-H), *i*PrOH-hexane 5/95, 0.5 mL/min, 240 nm,  $t_R$  (minor) = 12.238 min,  $t_R$  (major) = 14.084 min.

**$^1\text{H NMR}$  (600 MHz,  $\text{CDCl}_3$ )**  $\delta$  8.00 (d,  $J$  = 8.1 Hz, 2H), 7.96 (d,  $J$  = 8.8 Hz, 1H), 7.84 (d,  $J$  = 8.6 Hz, 1H), 7.73 (d,  $J$  = 2.0 Hz, 1H), 7.69 (dd,  $J$  = 8.6, 2.0 Hz, 1H), 7.25 (d,  $J$  = 7.9 Hz, 2H), 6.89 (d,  $J$  = 8.8 Hz, 1H), 6.04 (t,  $J$  = 6.8 Hz, 1H), 4.06 (s, 3H), 2.41 (s, 3H), 2.17 – 2.11 (m, 1H), 2.08 – 1.97 (m, 1H), 0.98 (t,  $J$  = 7.4 Hz, 3H).

**$^{13}\text{C NMR}$  (151 MHz,  $\text{CDCl}_3$ )**  $\delta$  166.0, 162.5, 146.3, 143.6, 138.7, 136.3, 129.7, 129.1, 127.8, 127.7, 127.5, 125.3, 124.7, 113.3, 77.5, 53.4, 29.5, 21.6, 10.0.

**HRMS** (ESI) calculated for  $\text{C}_{21}\text{H}_{21}\text{NNaO}_3^+$  ( $[\text{M}+\text{Na}]^+$ )  $m/z$  358.1414, found 358.1411.

**M.P.** 58.8 – 59.7 °C.

$[\alpha]_{\text{D}}^{25} = +104$  ( $c$  0.20,  $\text{CHCl}_3$ ).

#### **(S)-1-(6-Chloropyridin-3-yl)propyl 4-methylbenzoate (53)**

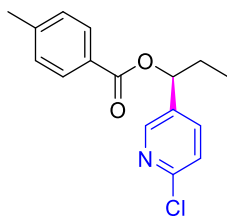

This compound was prepared according to the general procedure using 2-chloro-5-iodopyridine (35.9 mg, 0.15 mmol, 1.0 equiv) and 1-chloropropyl 4-methylbenzoate (63.8 mg, 0.3 mmol, 2.0 equiv). The crude mixture was purified by flash column chromatograph to afford **53** as an off-white solid (12.2 mg, 28% yield, 92% ee).

**Chiral HPLC** (CHIRALPAK AD-H), *i*PrOH-hexane 10/90, 1.0 mL/min, 240 nm,  $t_R$  (minor) = 10.567 min,  $t_R$  (major) = 14.891 min.

**$^1\text{H NMR}$  (600 MHz,  $\text{CDCl}_3$ )**  $\delta$  8.45 (d,  $J = 2.5$  Hz, 1H), 7.98 – 7.88 (m, 2H), 7.68 (dd,  $J = 8.2, 2.5$  Hz, 1H), 7.31 (d,  $J = 8.2$  Hz, 1H), 7.25 (d,  $J = 8.0$  Hz, 2H), 5.89 (dd,  $J = 7.5, 6.2$  Hz, 1H), 2.41 (s, 3H), 2.13 – 2.03 (m, 1H), 1.99 – 1.90 (m, 1H), 0.98 (t,  $J = 7.4$  Hz, 3H).

**$^{13}\text{C NMR}$  (151 MHz,  $\text{CDCl}_3$ )**  $\delta$  165.7, 150.9, 148.2, 144.1, 137.0, 135.2, 129.6, 129.2, 127.1, 124.1, 74.6, 29.2, 21.7, 9.7.

**HRMS** (ESI) calculated for  $\text{C}_{16}\text{H}_{16}\text{ClNNaO}_2^+$  ( $[\text{M}+\text{Na}]^+$ )  $m/z$  312.0762, found 312.0770.

**M.P.** 68.1 – 68.9 °C.

$[\alpha]_D^{25} = +54$  ( $c$  0.30,  $\text{CHCl}_3$ ).

#### (S)-1-(6-Methoxypyridin-3-yl)propyl 4-methylbenzoate (**54**)

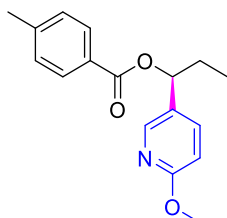

This compound was prepared according to the general procedure using 5-iodo-2-methoxypyridine (35.3 mg, 0.15 mmol, 1.0 equiv) and 1-chloropropyl 4-methylbenzoate (63.8 mg, 0.3 mmol, 2.0 equiv). The crude mixture was purified by flash column chromatograph to afford **54** as a colorless oil (22.3 mg, 52% yield, 92% ee).

**Chiral HPLC** (CHIRALCEL OD-H), *i*PrOH-hexane 2/98, 0.5 mL/min, 240 nm,  $t_R$  (minor) = 12.733 min,  $t_R$  (major) = 11.784 min.

**$^1\text{H NMR}$  (600 MHz,  $\text{CDCl}_3$ )**  $\delta$  8.23 (d,  $J = 2.5$  Hz, 1H), 7.97 – 7.90 (m, 2H), 7.63 (dd,  $J = 8.6, 2.5$  Hz, 1H), 7.22 (d,  $J = 8.0$  Hz, 2H), 6.73 (d,  $J = 8.5$  Hz, 1H), 5.86 (t,  $J = 6.9$  Hz, 1H), 3.92 (s, 3H), 2.39 (s, 3H), 2.11 – 2.04 (m, 1H), 1.95 – 1.88 (m, 1H), 0.95 (t,  $J = 7.4$  Hz, 3H).

**$^{13}\text{C NMR}$  (151 MHz,  $\text{CDCl}_3$ )**  $\delta$  165.8, 163.9, 145.5, 143.7, 137.1, 129.6, 129.0, 128.9, 127.5, 110.8, 75.2, 53.4, 29.1, 21.6, 9.9.

**HRMS** (ESI) calculated for  $\text{C}_{17}\text{H}_{19}\text{NNaO}_3^+$  ( $[\text{M}+\text{Na}]^+$ )  $m/z$  308.1258, found 308.1265



$[\alpha]_D^{25} = +30$  ( $c$  0.40,  $\text{CHCl}_3$ ).

**(S)-1-(4-((S)-2-((tert-Butoxycarbonyl)amino)-3-methoxy-3-oxopropyl)phenyl)propyl**

**4-methylbenzoate (55)**

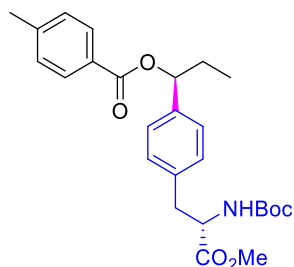

This compound was prepared according to the general procedure using methyl (S)-2-((tert-butoxycarbonyl)amino)-3-(*p*-tolyl) -propanoate (44.0 mg, 0.15 mmol, 1.0 equiv) and 1-chloropropyl 4-methylbenzoate (63.8 mg, 0.3 mmol, 2.0 equiv). The crude mixture was purified by flash column chromatograph to afford **55** as a colorless oil (41.0 mg, 60% yield,

93% de).

**Chiral HPLC** (CHIRALCEL OD-H), *i*PrOH-hexane 5/95, 0.5 mL/min, 240 nm,  $t_R$  (minor) = 24.873 min,  $t_R$  (major) = 22.533 min.

**$^1\text{H NMR}$  (600 MHz,  $\text{CDCl}_3$ )**  $\delta$  7.97 (d,  $J$  = 8.0 Hz, 2H), 7.33 (d,  $J$  = 7.7 Hz, 2H), 7.24 (d,  $J$  = 7.9 Hz, 2H), 7.11 (dd,  $J$  = 8.2, 3.4 Hz, 2H), 5.90 – 5.87 (m, 1H), 4.98 (d,  $J$  = 8.4 Hz, 1H), 4.58 (q,  $J$  = 6.8 Hz, 1H), 3.69 (s, 3H), 3.11 – 3.08 (m, 1H), 3.04 – 2.99 (m, 1H), 2.40 (s, 3H), 2.06 – 2.00 (m, 1H), 1.95 – 1.88 (m, 1H), 1.40 (d,  $J$  = 5.2 Hz, 9H), 0.94 (t,  $J$  = 7.4 Hz, 3H).

**$^{13}\text{C NMR}$  (151 MHz,  $\text{CDCl}_3$ )**  $\delta$  172.3, 165.9, 155.0, 143.5, 139.4, 135.5, 129.6, 129.3, 129.0, 127.7, 126.6, 79.9, 77.3, 54.3, 52.2, 38.0, 29.5, 28.2, 21.6, 9.9.

**HRMS** (ESI) calculated for  $\text{C}_{26}\text{H}_{33}\text{NNaO}_6^+$  ( $[\text{M}+\text{Na}]^+$ )  $m/z$  478.2201, found 478.2185.

$[\alpha]_D^{25} = +82$  ( $c$  0.50,  $\text{CHCl}_3$ ).

**(S)-1-(4-((1-Ethoxy-2-methyl-1-oxopropan-2-yl)oxy)phenyl)propyl 4-methylbenzoate (56)**

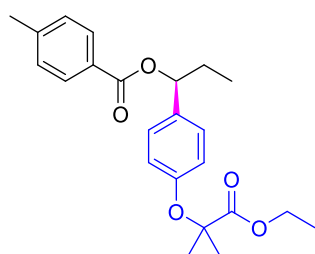

This compound was prepared according to the general procedure using ethyl 2-(4-iodophenoxy)-2-methylpropanoate (50.1 mg, 0.15 mmol, 1.0 equiv) and 1-chloropropyl 4-methylbenzoate (63.8 mg, 0.3 mmol, 2.0 equiv). The crude mixture was purified by flash column chromatograph to afford **56** as a colorless oil (45.0 mg, 78% yield, 91% ee).

**Chiral HPLC** (CHIRALPAK IC-H), *i*PrOH-hexane 5/95, 0.5 mL/min, 230 nm,  $t_R$  (minor) = 25.450 min,  $t_R$  (major) = 24.266 min.

**$^1\text{H NMR}$  (600 MHz,  $\text{CDCl}_3$ )**  $\delta$  7.95 (d,  $J$  = 8.0 Hz, 2H), 7.27 (d,  $J$  = 8.6 Hz, 2H), 7.23 (d,  $J$  = 7.9 Hz,

2H), 6.80 (d,  $J = 8.6$  Hz, 2H), 5.86 (t,  $J = 6.8$  Hz, 1H), 4.22 (q,  $J = 7.1$  Hz, 2H), 2.40 (s, 3H), 2.03 (dp,  $J = 14.7, 7.4$  Hz, 1H), 1.95 – 1.82 (m, 1H), 1.58 (d,  $J = 2.7$  Hz, 6H), 1.22 (t,  $J = 7.1$  Hz, 3H), 0.92 (t,  $J = 7.4$  Hz, 3H).

**$^{13}\text{C}$  NMR (151 MHz,  $\text{CDCl}_3$ )**  $\delta$  174.2, 166.0, 155.0, 143.5 134.2, 129.6, 129.0, 127.9, 127.4, 118.8, 79.1, 77.2, 61.4, 29.4, 25.4, 25.3, 21.6, 14.0, 10.0.

**HRMS** (ESI) calculated for  $\text{C}_{23}\text{H}_{28}\text{NaO}_5^+$  ( $[\text{M}+\text{Na}]^+$ )  $m/z$  407.1829, found 407.1813.

$[\alpha]_{\text{D}}^{25} = +29$  ( $c$  0.50,  $\text{CHCl}_3$ ).

#### **(*R*)-1-(4-(Ethoxycarbonyl)phenyl)butyl 4-methylbenzoate (57)**

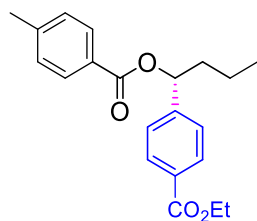

This compound was prepared according to the general procedure using (*S,S*)-**L1**, ethyl 4-bromobenzoate (34.4 mg, 0.15 mmol, 1.0 equiv) and 1-chloropropyl 4-methylbenzoate (68.0 mg, 0.3 mmol, 2.0 equiv). The crude mixture was purified by flash column chromatograph to afford **57** as a

colorless oil (47.0 mg, 92% yield, –93% ee).

**Chiral HPLC** (CHIRALCEL OD-H), *i*PrOH-hexane 2/98, 0.5 mL/min, 240 nm,  $t_{\text{R}}$  (minor) = 13.859 min,  $t_{\text{R}}$  (major) = 16.787 min.

**$^1\text{H}$  NMR (600 MHz,  $\text{CDCl}_3$ )**  $\delta$  8.02 (d,  $J = 8.1$  Hz, 2H), 7.97 (d,  $J = 7.9$  Hz, 2H), 7.46 (d,  $J = 8.1$  Hz, 2H), 7.25 (d,  $J = 7.9$  Hz, 2H), 6.08 – 5.96 (m, 1H), 4.36 (q,  $J = 7.1$  Hz, 2H), 2.41 (s, 3H), 2.07 – 2.00 (m, 1H), 1.90 – 1.84 (m, 1H), 1.49 – 1.33 (m, 5H), 0.95 (t,  $J = 7.4$  Hz, 3H).

**$^{13}\text{C}$  NMR (151 MHz,  $\text{CDCl}_3$ )**  $\delta$  166.3, 165.8, 146.1, 143.8, 129.9, 129.7, 129.6, 129.1, 127.5, 126.2, 75.7, 60.9, 38.6, 21.7, 18.7, 14.3, 13.8.

**HRMS** (ESI) calculated for  $\text{C}_{21}\text{H}_{24}\text{NaO}_4^+$  ( $[\text{M}+\text{Na}]^+$ )  $m/z$  363.1567, found 363.1564.

$[\alpha]_{\text{D}}^{25} = -61$  ( $c$  0.50,  $\text{CHCl}_3$ ).

#### **(*S*)-3-(Benzoyloxy)-1-(3-chlorophenyl)propyl 4-methylbenzoate (58)**

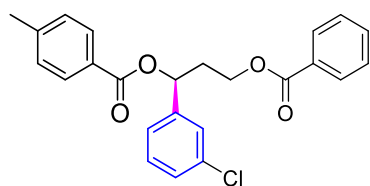

This compound was prepared according to the general procedure using 1-chloro-3-iodobenzene (35.8 mg, 0.15 mmol, 1.0 equiv) and 3-(benzoyloxy)-1-chloropropyl 4-methylbenzoate (99.8 mg, 0.3 mmol, 2.0 equiv). The crude mixture was purified by flash

column chromatograph to afford **58** as a colorless oil (50.3 mg, 82% yield, 87% ee).

**Chiral HPLC** (CHIRALCEL AD-H), *i*PrOH-hexane 10/90, 1.0 mL/min, 240 nm,  $t_R$  (minor) = 9.711 min,  $t_R$  (major) = 11.333 min.

**$^1\text{H NMR}$  (600 MHz,  $\text{CDCl}_3$ )**  $\delta$  7.96 – 7.93 (m, 4H), 7.56 – 7.50 (m, 1H), 7.44 – 7.37 (m, 3H), 7.32 – 7.28 (m, 1H), 7.26 – 7.17 (m, 4H), 6.14 (dd,  $J = 8.1, 5.4$  Hz, 1H), 4.47 – 4.37 (m, 2H), 2.54 – 2.48 (m, 1H), 2.42 – 2.32 (m, 4H).

**$^{13}\text{C NMR}$  (151 MHz,  $\text{CDCl}_3$ )**  $\delta$  166.4, 165.6, 144.0, 142.2, 134.6, 133.0, 130.0, 129.9, 129.7, 129.6, 129.2, 128.3, 127.0, 126.4, 124.5, 72.8, 61.1, 35.6, 21.7.

**HRMS** (ESI) calculated for  $\text{C}_{24}\text{H}_{21}\text{ClNaO}_4^+$  ( $[\text{M}+\text{Na}]^+$ )  $m/z$  431.1021, found 431.1023.

$[\alpha]_{\text{D}}^{25} = +26$  ( $c$  0.90,  $\text{CHCl}_3$ ).

#### **(S)-1-(4-Fluorophenyl)-5-methoxy-5-oxopentyl 4-methylbenzoate (59)**

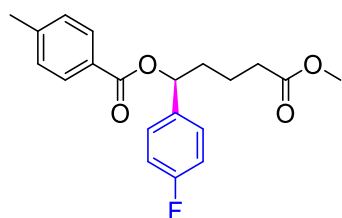

This compound was prepared according to the general procedure using methyl 1-fluoro-4-iodobenzene (33.3 mg, 0.15 mmol, 1.0 equiv) and 1-chloro-5-methoxy-5-oxopentyl 4-methylbenzoate (85.4 mg, 0.3 mmol, 2.0 equiv). The crude mixture was purified by flash

column chromatograph to afford **59** as a colorless oil (37.2 mg, 72% yield, 91% ee).

**Chiral HPLC** (CHIRALCEL OD-H), *i*PrOH-hexane 5/95, 0.5 mL/min, 210 nm,  $t_R$  (minor) = 17.734 min,  $t_R$  (major) = 16.456 min.

**$^1\text{H NMR}$  (600 MHz,  $\text{CDCl}_3$ )**  $\delta$  7.99 – 7.92 (m, 2H), 7.43 – 7.35 (m, 2H), 7.26 – 7.21 (m, 2H), 7.07 – 6.99 (m, 2H), 5.95 (dd,  $J = 7.8, 5.8$  Hz, 1H), 3.65 (s, 3H), 2.41 (s, 3H), 2.36 (t,  $J = 7.4$  Hz, 2H), 2.11 – 2.03 (m, 1H), 1.95 – 1.90 (m, 1H), 1.80 – 1.72 (m, 1H), 1.70 – 1.64 (m, 1H).

**$^{13}\text{C NMR}$  (151 MHz,  $\text{CDCl}_3$ )**  $\delta$  173.5, 165.8, 162.3 (d,  $J = 246.3$  Hz), 143.8, 136.3 (d,  $J = 3.2$  Hz) 129.6, 129.1, 128.1 (d,  $J = 8.0$  Hz), 127.4, 115.4 (d,  $J = 21.5$  Hz), 75.2, 51.5, 35.8, 33.5, 21.6, 20.9.

**$^{19}\text{F NMR}$  (565 MHz,  $\text{CDCl}_3$ )**  $\delta$  -114.23.

**HRMS** (ESI) calculated for  $\text{C}_{20}\text{H}_{21}\text{FNaO}_4^+$  ( $[\text{M}+\text{Na}]^+$ )  $m/z$  367.1317, found 367.1315.

$[\alpha]_{\text{D}}^{25} = +43$  ( $c$  0.20,  $\text{CHCl}_3$ ).

#### **(R)-1-(3,5-Bis(trifluoromethyl)phenyl)ethyl 4-methylbenzoate (60)**

This compound was prepared according to the general procedure using (*S,S*)-**L1**, methyl 1-bromo-3,5-bis(trifluoromethyl)benzene (44.0 mg, 0.15 mmol, 1.0 equiv) and 1-chloroethyl

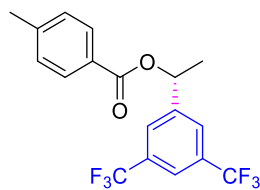

4-methylbenzoate (59.6 mg, 0.3 mmol, 2.0 equiv). The crude mixture was purified by flash column chromatograph to afford **60** as a colorless oil (40.6 mg, 72% yield, -92% ee).

**Chiral HPLC** (CHIRALCEL OD-H), *i*PrOH-hexane 0/100, 0.5 mL/min, 240 nm,  $t_R$  (minor) = 35.830 min,  $t_R$  (major) = 37.689 min.

**$^1\text{H NMR}$  (600 MHz,  $\text{CDCl}_3$ )**  $\delta$  7.99 – 7.94 (m, 2H), 7.88 (d,  $J$  = 1.6 Hz, 2H), 7.82 (s, 1H), 7.27 (d,  $J$  = 8.0 Hz, 2H), 6.19 (q,  $J$  = 6.7 Hz, 1H), 2.43 (s, 3H), 1.71 (d,  $J$  = 6.7 Hz, 3H).

**$^{13}\text{C NMR}$  (151 MHz,  $\text{CDCl}_3$ )**  $\delta$  165.6, 144.6, 144.2, 132.0 (q,  $J$  = 33.3 Hz), 129.7, 129.2, 126.9, 126.2 (d,  $J$  = 3.9 Hz), 123.2 (q,  $J$  = 272.9 Hz), 121.9 (dt,  $J$  = 7.5, 3.8 Hz), 71.3, 22.4, 21.7.

**$^{19}\text{F NMR}$  (565 MHz,  $\text{CDCl}_3$ )**  $\delta$  -62.83.

**HRMS** (ESI) calculated for  $\text{C}_{18}\text{H}_{15}\text{F}_6\text{O}_2^+$  ( $[\text{M}+\text{H}]^+$ )  $m/z$  377.0971, found 377.0979.

$[\alpha]_{\text{D}}^{25} = -65$  (c 0.50,  $\text{CHCl}_3$ ).

**(S) -1-(3,6-Dihydro-2H-thiopyran-4-yl)propyl 4-methylbenzoate (61)**

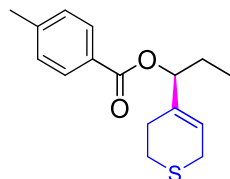

This compound was prepared according to the general procedure using 3,6-dihydro-2H-thiopyran-4-yl trifluoromethanesulfonate (37.2 mg, 0.15 mmol, 1.0 equiv) and 1-chlorobutyl 4-methylbenzoate (63.8 mg, 0.3 mmol, 2.0 equiv).

The crude mixture was purified by flash column chromatograph to afford **61** as a colorless oil (25.0 mg, 60% yield, 90% ee).

**Chiral HPLC** (CHIRALCEL OD-H), *i*PrOH-hexane 2/98, 0.5 mL/min, 240 nm,  $t_R$  (minor) = 18.318 min,  $t_R$  (major) = 19.630 min.

**$^1\text{H NMR}$  (600 MHz,  $\text{CDCl}_3$ )**  $\delta$  8.01 – 7.84 (m, 2H), 7.24 (d,  $J$  = 7.9 Hz, 2H), 5.95 (tt,  $J$  = 4.0, 1.8 Hz, 1H), 5.28 (t,  $J$  = 6.9 Hz, 1H), 3.30 – 3.07 (m, 2H), 2.79 – 2.67 (m, 2H), 2.44 – 2.28 (m, 5H), 1.88 – 1.70 (m, 2H), 0.93 (t,  $J$  = 7.4 Hz, 3H).

**$^{13}\text{C NMR}$  (151 MHz,  $\text{CDCl}_3$ )**  $\delta$  165.8, 143.5, 136.7, 129.6, 129.0, 127.8, 121.7, 80.0, 25.7, 25.3, 25.0, 24.8, 21.6, 9.9.

**HRMS** (ESI) calculated for  $\text{C}_{16}\text{H}_{20}\text{NaO}_2\text{S}^+$  ( $[\text{M}+\text{Na}]^+$ )  $m/z$  299.1077, found 299.1063.

$[\alpha]_{\text{D}}^{25} = +23$  (c 0.20,  $\text{CHCl}_3$ ).

**(S) -1-(1-Tosyl-1,2,3,6-tetrahydropyridin-4-yl)propyl 4-methylbenzoate (62)**

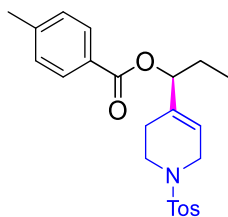

This compound was prepared according to the general procedure using 1-Tosyl-1,2,3,6-tetrahydropyridin-4-yl trifluoromethanesulfonate (57.8 mg, 0.15 mmol, 1.0 equiv) and 1-chlorobutyl 4-methylbenzoate (63.8 mg, 0.3 mmol, 2.0 equiv). The crude mixture was purified by flash column chromatograph to afford **62** as a colorless oil (44.2 mg, 71% yield, 88% ee).

**Chiral HPLC** (CHIRALCEL OD-H), *i*PrOH-hexane 10/90, 0.5 mL/min, 240 nm,  $t_R$  (minor) = 28.104 min,  $t_R$  (major) = 30.808 min.

**$^1\text{H NMR}$  (600 MHz,  $\text{CDCl}_3$ )**  $\delta$  7.89 (d,  $J$  = 8.0 Hz, 2H), 7.65 (d,  $J$  = 8.0 Hz, 2H), 7.29 (d,  $J$  = 8.0 Hz, 2H), 7.22 (d,  $J$  = 7.9 Hz, 2H), 5.68 (t,  $J$  = 3.6 Hz, 1H), 5.26 (t,  $J$  = 6.8 Hz, 1H), 3.70 – 3.51 (m, 2H), 3.30 (dt,  $J$  = 11.3, 5.4 Hz, 1H), 3.07 (dt,  $J$  = 11.8, 5.9 Hz, 1H), 2.40 (s, 3H), 2.40 (s, 3H), 2.26 – 2.22 (m, 2H), 1.80 – 1.66 (m, 2H), 0.89 (t,  $J$  = 7.4 Hz, 3H).

**$^{13}\text{C NMR}$  (151 MHz,  $\text{CDCl}_3$ )**  $\delta$  165.7, 143.7, 143.6, 134.7, 133.0, 129.6, 129.5, 129.1, 127.6, 127.5, 119.8, 78.1, 44.5, 42.6, 25.5, 24.3, 21.6, 21.4, 9.7.

**HRMS** (ESI) calculated for  $\text{C}_{23}\text{H}_{27}\text{NNaO}_4\text{S}^+$  ( $[\text{M}+\text{Na}]^+$ )  $m/z$  436.1553, found 436.1536.

$[\alpha]_D^{25} = +58$  ( $c$  0.50,  $\text{CHCl}_3$ ).

### (*S*)-1-(Cyclopent-1-en-1-yl)propyl 4-methylbenzoate (**63**)

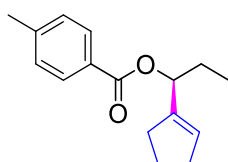

This compound was prepared according to the general procedure using cyclopent-1-en-1-yl trifluoromethanesulfonate (32.4 mg, 0.15 mmol, 1.0 equiv) and 1-chlorobutyl 4-methylbenzoate (63.8 mg, 0.3 mmol, 2.0 equiv). The crude mixture was purified by flash column chromatograph to afford **63** as a colorless oil (29.8 mg, 81% yield, 85% ee).

**Chiral HPLC** (CHIRALCEL OD-H), hexane, 0.5 mL/min, 240 nm,  $t_R$  (minor) = 30.963 min,  $t_R$  (major) = 32.054 min.

**$^1\text{H NMR}$  (600 MHz,  $\text{CDCl}_3$ )**  $\delta$  7.95 (d,  $J$  = 7.8 Hz, 2H), 7.24 (d,  $J$  = 7.8 Hz, 2H), 5.71 – 5.64 (m, 1H), 5.59 (t,  $J$  = 6.6 Hz, 1H), 2.41 (s, 3H), 2.38 – 2.30 (m, 4H), 1.93 – 1.85 (m, 2H), 1.84 – 1.77 (m, 2H), 0.93 (t,  $J$  = 7.4 Hz, 3H).

**$^{13}\text{C NMR}$  (151 MHz,  $\text{CDCl}_3$ )**  $\delta$  166.1, 143.4, 142.4, 129.6, 129.0, 128.0, 127.2, 74.8, 32.2, 31.6, 26.1, 23.1, 21.6, 9.7.

**HRMS** (ESI) calculated for  $\text{C}_{16}\text{H}_{20}\text{NaO}_2^+$  ( $[\text{M}+\text{Na}]^+$ )  $m/z$  267.1356, found 267.1357.

$[\alpha]_{\text{D}}^{25} = +3.1$  ( $c$  0.70,  $\text{CHCl}_3$ ).

**(S)-1-(Cyclohept-1-en-1-yl)propyl 4-methylbenzoate (64)**

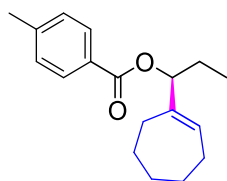

This compound was prepared according to the general procedure using cyclohept-1-en-1-yl trifluoromethanesulfonate (36.6 mg, 0.15 mmol, 1.0 equiv) and 1-chlorobutyl 4-methylbenzoate (63.8 mg, 0.3 mmol, 2.0 equiv). The crude mixture was purified by flash column chromatograph to afford **64** as a colorless oil (20.8 mg, 51% yield, 88% ee).

**Chiral HPLC** (CHIRALCEL OD-H), *i*PrOH-hexane 0.5/99.5, 0.5 mL/min, 240 nm,  $t_{\text{R}}$  (minor) = 12.383 min,  $t_{\text{R}}$  (major) = 13.028 min.

**$^1\text{H NMR}$  (600 MHz,  $\text{CDCl}_3$ )**  $\delta$  7.94 (d,  $J$  = 8.0 Hz, 2H), 7.23 (d,  $J$  = 7.9 Hz, 2H), 5.91 (t,  $J$  = 6.5 Hz, 1H), 5.25 (t,  $J$  = 6.9 Hz, 1H), 2.40 (s, 3H), 2.22 (dt,  $J$  = 6.8, 2.9 Hz, 2H), 2.18 – 2.08 (m, 2H), 1.73 (ddd,  $J$  = 45.1, 14.0, 7.0 Hz, 4H), 1.56 – 1.41 (m, 4H), 0.91 (t,  $J$  = 7.4 Hz, 3H).

**$^{13}\text{C NMR}$  (151 MHz,  $\text{CDCl}_3$ )**  $\delta$  166.0, 143.2, 141.7, 130.1, 129.5, 129.0, 128.2, 81.3, 32.6, 28.2, 28.1, 26.9, 26.8, 25.7, 21.6, 10.1.

**HRMS** (ESI) calculated for  $\text{C}_{18}\text{H}_{24}\text{NaO}_2^+$  ( $[\text{M}+\text{Na}]^+$ )  $m/z$  295.1669, found 295.1662.

$[\alpha]_{\text{D}}^{25} = +12$  ( $c$  0.60,  $\text{CHCl}_3$ ).

**(S)-1-(6,7-Dihydro-5H-benzo[7]annulen-9-yl)propyl 4-methylbenzoate (65)**

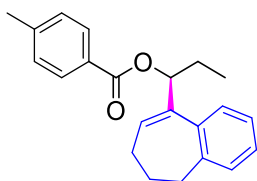

This compound was prepared according to the general procedure using 6,7-dihydro-5H-benzo[7]annulen-9-yl trifluoromethanesulfonate (43.8 mg, 0.15 mmol, 1.0 equiv) and 1-chlorobutyl 4-methylbenzoate (63.8 mg, 0.3 mmol, 2.0 equiv). The crude mixture was purified by flash column chromatograph to afford **65** as a colorless oil (32.8 mg, 68% yield, 89% ee).

**Chiral HPLC** (CHIRALCEL OD-H), *i*PrOH-hexane 1/99, 0.5 mL/min, 240 nm,  $t_{\text{R}}$  (minor) = 18.304 min,  $t_{\text{R}}$  (major) = 16.893 min.

**$^1\text{H NMR}$  (600 MHz,  $\text{CDCl}_3$ )**  $\delta$  8.03 (d,  $J$  = 7.9 Hz, 2H), 7.60 (d,  $J$  = 7.7 Hz, 1H), 7.28 (d,  $J$  = 7.9 Hz, 3H), 7.24 – 7.18 (m, 2H), 6.28 (t,  $J$  = 7.3 Hz, 1H), 5.82 (t,  $J$  = 6.5 Hz, 1H), 2.63 – 2.51 (m, 2H), 2.43 (s, 3H), 2.10 (p,  $J$  = 7.1 Hz, 2H), 1.90 – 1.82 (m, 1H), 1.82 – 1.68 (m, 3H), 0.92 (t,  $J$  = 7.4 Hz, 3H).

**<sup>13</sup>C NMR (151 MHz, CDCl<sub>3</sub>)** δ 166.1, 143.5, 141.4, 140.5, 138.4, 129.6, 129.1, 128.8, 128.0, 127.9, 127.0, 126.9, 126.1, 78.3, 34.7, 32.2, 27.6, 24.1, 21.7, 10.1.

**HRMS** (ESI) calculated for C<sub>22</sub>H<sub>25</sub>O<sub>2</sub><sup>+</sup> ([M+H]<sup>+</sup>) m/z 321.1850, found 321.1837.

[α]<sub>D</sub><sup>25</sup> = +84 (c 0.30, CHCl<sub>3</sub>).

**(S)-1-(3,4-Dihydronaphthalen-1-yl)propyl 4-methylbenzoate (66)**

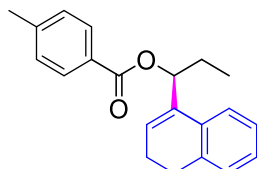

This compound was prepared according to the general procedure using 3,4-dihydronaphthalen-1-yl trifluoromethanesulfonate (41.7 mg, 0.15 mmol, 1.0 equiv) and 1-chlorobutyl 4-methylbenzoate (63.8 mg, 0.3 mmol, 2.0

equiv). The crude mixture was purified by flash column chromatograph to afford **66** as a colorless oil (29.5 mg, 64% yield, 91% ee).

**Chiral HPLC** (CHIRALPAK AD-H), *i*PrOH-hexane 5/95, 1.0 mL/min, 254 nm, *t*<sub>R</sub> (minor) = 10.072 min, *t*<sub>R</sub> (major) = 14.579 min.

**<sup>1</sup>H NMR (600 MHz, CDCl<sub>3</sub>)** δ 8.00 (d, *J* = 7.9 Hz, 2H), 7.53 (d, *J* = 7.7 Hz, 1H), 7.25 – 7.21 (m, 3H), 7.16 (d, *J* = 4.5 Hz, 2H), 6.22 (t, *J* = 4.7 Hz, 1H), 5.97 (t, *J* = 6.5 Hz, 1H), 2.75 (t, *J* = 8.0 Hz, 2H), 2.42 (s, 3H), 2.34 – 2.24 (m, 4.6 Hz, 2H), 2.04 – 1.93 (m, 2H), 0.98 (t, *J* = 7.4 Hz, 3H).

**<sup>13</sup>C NMR (151 MHz, CDCl<sub>3</sub>)** δ 165.9, 143.5, 136.8, 135.4, 132.8, 129.6, 129.0, 127.9, 127.8, 127.0, 126.8, 126.3, 123.2, 76.1, 28.2, 27.0, 22.8, 21.6, 10.1.

**HRMS** (ESI) calculated for C<sub>21</sub>H<sub>23</sub>O<sub>2</sub><sup>+</sup> ([M+H]<sup>+</sup>) m/z 307.1693, found 307.1675.

[α]<sub>D</sub><sup>25</sup> = +9 (c 0.30, CHCl<sub>3</sub>).

**(S)-1-(3,4-Dihydronaphthalen-2-yl)propyl 4-methylbenzoate (67)**

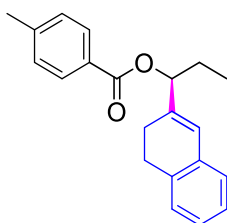

This compound was prepared according to the general procedure using 3,4-dihydronaphthalen-2-yl trifluoromethanesulfonate (41.7 mg, 0.15 mmol, 1.0 equiv) and 1-chlorobutyl 4-methylbenzoate (63.8 mg, 0.3 mmol, 2.0 equiv).

The crude mixture was purified by flash column chromatograph to afford **67** as a colorless oil (33.2 mg, 72% yield, 88% ee).

**Chiral HPLC** (CHIRALPAK AD-H), *i*PrOH-hexane 2/98, 0. mL/min, 254 nm, *t*<sub>R</sub> (minor) = 22.303 min, *t*<sub>R</sub> (major) = 29.739 min.

**<sup>1</sup>H NMR (600 MHz, CDCl<sub>3</sub>)** δ 8.00 – 7.94 (m, 2H), 7.25 (d, *J* = 4.0 Hz, 2H), 7.16 – 7.07 (m, 3H), 7.05

– 7.01 (m, 1H), 6.50 (d,  $J = 1.5$  Hz, 1H), 5.53 (t,  $J = 6.7$  Hz, 1H), 2.92 – 2.74 (m, 2H), 2.47 – 2.29 (m, 5H), 1.96 – 1.79 (m, 2H), 0.98 (t,  $J = 7.4$  Hz, 3H).

**$^{13}\text{C}$  NMR (151 MHz,  $\text{CDCl}_3$ )**  $\delta$  165.9, 143.5, 138.5, 135.0, 133.8, 129.6, 129.1, 127.9, 127.2, 127.0, 126.5, 126.3, 124.5, 78.5, 27.9, 25.8, 23.3, 21.7, 9.8.

**HRMS** (ESI) calculated for  $\text{C}_{21}\text{H}_{22}\text{NaO}_2^+$  ( $[\text{M}+\text{Na}]^+$ )  $m/z$  329.1512, found 329.1501.

$[\alpha]_{\text{D}}^{25} = +34$  ( $c$  0.50,  $\text{CHCl}_3$ ).

### (S)-1-(1*H*-Inden-2-yl)propyl 4-methylbenzoate (**68**)

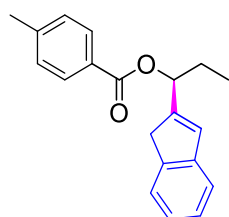

This compound was prepared according to the general procedure using 2-bromo-1*H*-indene (29.3 mg, 0.15 mmol, 1.0 equiv) and 1-chlorobutyl 4-methylbenzoate (63.8 mg, 0.3 mmol, 2.0 equiv). The crude mixture was purified by flash column chromatograph to afford **68** as a colorless oil (29.9 mg, 68% yield, 85% ee).

**Chiral HPLC** (CHIRALPAK AD-H), *i*PrOH-hexane 5/95, 1.0 mL/min, 254 nm,  $t_{\text{R}}$  (minor) = 13.195 min,  $t_{\text{R}}$  (major) = 16.901 min.

**$^1\text{H}$  NMR (600 MHz,  $\text{CDCl}_3$ )**  $\delta$  8.00 (d,  $J = 8.0$  Hz, 2H), 7.43 (d,  $J = 7.4$  Hz, 1H), 7.35 (d,  $J = 7.5$  Hz, 1H), 7.26 (d,  $J = 7.9$  Hz, 3H), 7.17 (dd,  $J = 8.1, 6.9$  Hz, 1H), 6.84 (s, 1H), 5.96 (t,  $J = 6.6$  Hz, 1H), 3.55 – 3.40 (m, 2H), 2.43 (s, 3H), 2.08 – 1.95 (m, 2H), 1.02 (t,  $J = 7.4$  Hz, 3H).

**$^{13}\text{C}$  NMR (151 MHz,  $\text{CDCl}_3$ )**  $\delta$  166.0, 147.1, 144.2, 143.6, 143.0, 129.6, 129.1, 128.8, 127.7, 126.4, 124.6, 123.7, 121.0, 74.3, 38.2, 27.5, 21.6, 9.8.

**HRMS** (ESI) calculated for  $\text{C}_{20}\text{H}_{20}\text{NaO}_2^+$  ( $[\text{M}+\text{Na}]^+$ )  $m/z$  315.1356, found 315.1337.

$[\alpha]_{\text{D}}^{25} = +20$  ( $c$  0.60,  $\text{CHCl}_3$ ).

## Part 5. Control Experiments and Other Possible Mechanism

### Part 5.1 Radical clock reaction

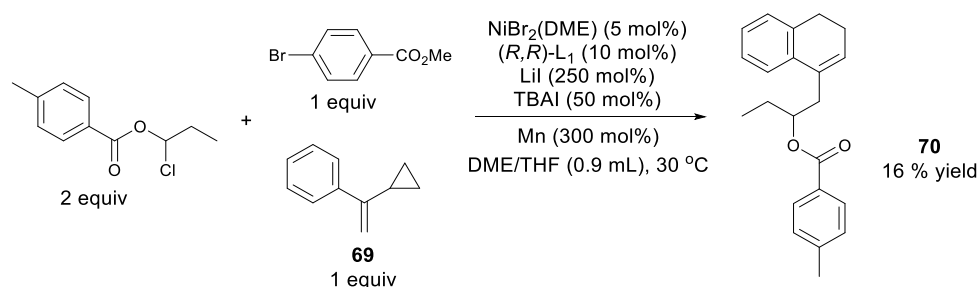



### 1-(3,4-Dihydronaphthalen-1-yl)butan-2-yl 4-methylbenzoate (70)

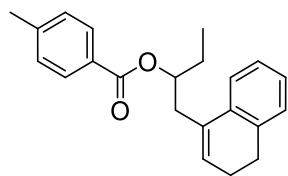

To a flame-dried tube with a stir bar was added the appropriate ligand (9 mg, 10 mol%) and methyl 4-bromobenzoate (32.3 mg, 0.15 mmol, 1.0 equiv). The tube was transferred into an N<sub>2</sub>-filled glovebox, NiBr<sub>2</sub>(DME) (2.3 mg, 5 mol%), Mn (24.7 mg, 3.0 equiv), LiI (50.2 mg, 2.5 equiv), TBAI (27.7 mg, 0.5 equiv) were added. The tube was sealed, and removed from the glovebox. The tube was charged with THF/DME (2:1, 0.9 mL) and stirred vigorously, ensuring that the reductant was uniformly suspended. Then (1-cyclopropylvinyl) -benzene (21.6 mg, 1.0 equiv) and 1-chloropropyl 4-methylbenzoate (63.8 mg, 2.0 equiv) were added to the tube. The mixture was stirred vigorously at 30 °C for 40 h. After that, the mixture was loaded directly onto a silica gel column (eluted with 0-5% EtOAc/Petroleum ether) to give **2** (85% yield) and **74** (colorless oil, 7.6 mg, 16% yield).

**<sup>1</sup>H NMR (600 MHz, CDCl<sub>3</sub>)** δ 7.90 (d, *J* = 7.9 Hz, 2H), 7.48 (d, *J* = 7.7 Hz, 1H), 7.23 (t, *J* = 7.2 Hz, 3H), 7.16 – 7.09 (m, 2H), 5.93 (t, *J* = 4.3 Hz, 1H), 5.25 – 5.19 (m, 1H), 2.96 (dd, *J* = 14.2, 6.5 Hz, 1H), 2.74 – 2.60 (m, 3H), 2.41 (s, 3H), 2.24 – 2.18 (m, 2H), 1.80 – 1.66 (m, 2H), 0.97 (t, *J* = 7.4 Hz, 3H).

**<sup>13</sup>C NMR (151 MHz, CDCl<sub>3</sub>)** δ 166.4, 143.3, 136.5, 134.5, 132.8, 129.5, 129.0, 128.0, 127.9, 127.5, 126.8, 126.6, 123.0, 74.5, 37.5, 28.3, 26.6, 23.1, 21.6, 9.6.

**HRMS** (ESI) calculated for C<sub>22</sub>H<sub>25</sub>NaO<sub>2</sub><sup>+</sup> ([M+H]<sup>+</sup>) *m/z* 321.1850, found 321.1839.

### Part 5.2 Stoichiometric reaction of Ar-Ni(II) with 1

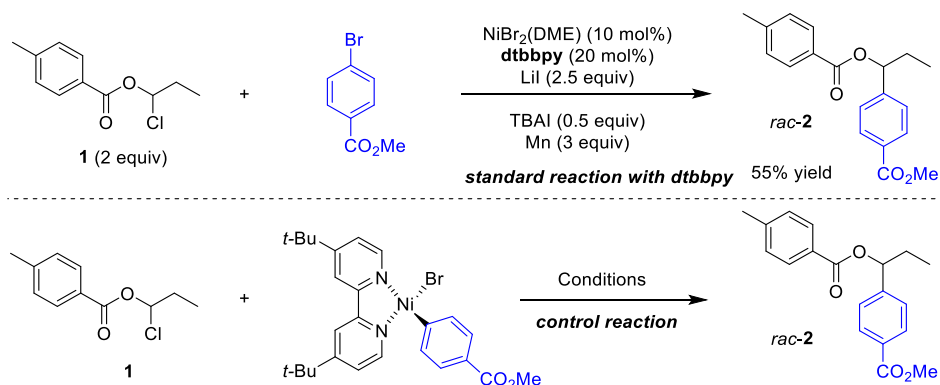

| Condition | Mn      | LiI       | TBAI      | <i>rac</i> -2 |
|-----------|---------|-----------|-----------|---------------|
| 1         | 3 equiv | 2.5 equiv | 0.5 equiv | 22%           |
| 2         | -       | 2.5 equiv | 0.5 equiv | 36%           |

The reaction was conducted in an argon-filled glove box. To a reaction tube equipped with a magnetic stir bar was added Ar-Ni(L)Br (40.7 mg, 0.075 mmol), Mn (if needed, 3 equiv) and LiI (2.5 equiv),

TBAI (0.5 equiv), followed by DME and THF. The reaction tube was sealed and removed from the glove box, then 1-chloropropyl 4-methylbenzoate (32 mg, 2 equiv) was added to the mixture. The reaction mixture was stirred at 30 °C for 24 h. Then the reaction mixture was diluted with ethyl acetate (5 mL) and water (5 mL). The mixture was extracted with EtOAc (3 x 15 mL), the combined organic phases were washed with water and brine, then dried over MgSO<sub>4</sub> and concentrated. The reaction mixtures were analyzed by <sup>1</sup>H NMR with an internal standard.

### Part 5.3 A possible sequential reduction (or double oxidative addition) mechanism

This mechanism starts with the oxidative addition of Ar–X to Ni(0), and the generated Ar–Ni(II)–X (**A**) is reduced to Ar–Ni(I) (**B**) by Mn(0). A second oxidative addition of an alkyl electrophile C(sp<sup>3</sup>)–Y (Y = I or Cl) to (**B**) gives Ar–Ni(III)Y–C(sp<sup>3</sup>) (**D**) via an in-cage radical/Ni rebound. The reductive elimination of (**D**) produced the desired product (**E**) and a Ni(I)–Y complex (**F**). The reduction of (**F**) to Ni(0) closes the catalytic cycle.

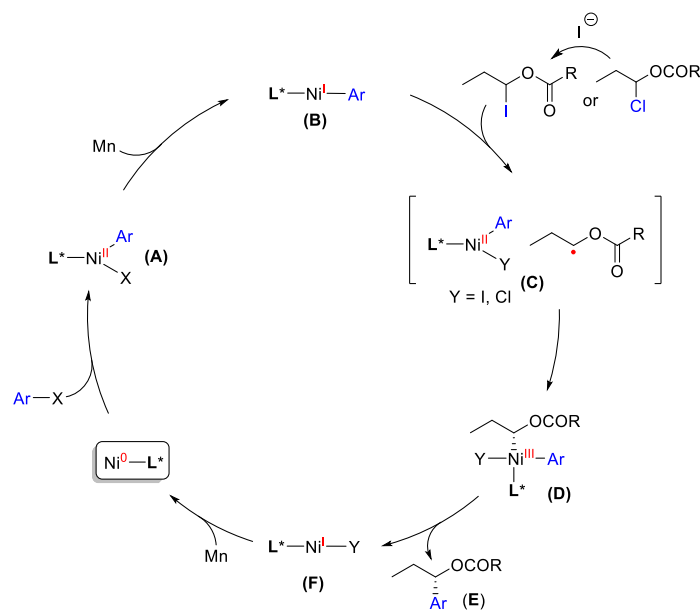

### Part 6. Scale-Up Synthesis

To a flame-dried vial with a stir bar was added (*R,R*)-**L1** (299.5 mg, 0.5 mmol, 10 mol%) and methyl 4-bromobenzoate (1.08 g, 5.0 mmol, 1.0 equiv). The vial was transferred into an N<sub>2</sub>-filled glovebox, Mn (824 mg, 15 mmol, 3.0 equiv), NiBr<sub>2</sub>(DME) (77.2 mg, 0.25 mmol, 5 mol%), LiI (1.67 g, 12.5 mmol, 2.5 equiv) and TBAI (923.5 mg, 2.5 mmol, 0.5 equiv) were added. The vial was sealed and removed from the glovebox. The vial was charged with solvent (THF/DME 2:1, 30 mL) and stirred vigorously, ensuring that the reductant was uniformly suspended. After 5 min, 1-chloropropyl

4-methylbenzoate **1** (2.13 g, 10 mmol, 2.0 equiv) was added to the vial with a syringe over 5 min. The mixture was stirred vigorously at 30 °C for 48 h. After the reaction was complete, the reaction mixture was concentrated under reduced pressure to remove about 20 mL solvent, the left mixture was loaded directly onto a silica gel column (eluted with 0-5% EtOAc/Petroleum ether) to give the target molecule **2** (1.33 g, 85% yield, 93% ee).

### Part 7. One Pot Synthesis

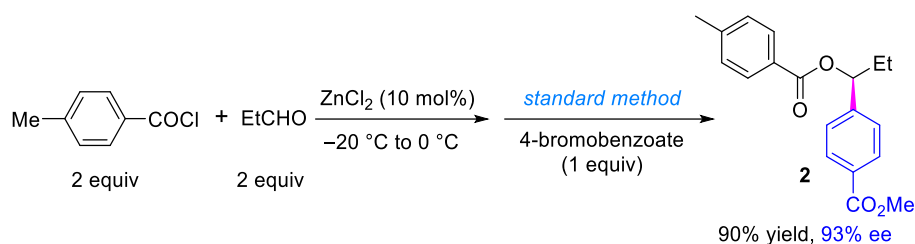

To a round-bottom flask equipped with a stir bar was charged with ZnCl<sub>2</sub> (4 mg, 10 mol%). The flask was placed under a nitrogen atmosphere by evacuating and backfilling the flask (three cycles), followed by the addition of DCM (0.6 mL) and 4-methylbenzoyl chloride (46.4 mg, 0.3 mmol), then the resulting solution was cooled to -20 °C and stirred for 5 min. After that, propionaldehyde (1 M in DCM, 0.3 mmol) was added dropwise to the above mixture over 5 min. The reaction mixture was stirred for 3 hours at -20~0 °C. Then the mixture was concentrated in vacuo to afford the residue which was used directly in the next step.

To a flame-dried tube with a stir bar was added methyl 4-bromobenzoate (32.3 mg, 0.15 mmol, 1.0 equiv), (*R,R*)-**L1** (9 mg, 10 mol%). The tube was transferred into an N<sub>2</sub>-filled glovebox, Mn (24.7 mg, 0.45 mmol, 3.0 equiv), NiBr<sub>2</sub>(DME) (2.3 mg, 5 mol %), LiI (50.2 mg, 2.5 equiv) and TBAI (27.7 mg, 0.5 equiv) were added. The tube was sealed, removed from the glovebox and charged with THF (0.3 mL). The mixture was stirred vigorously, ensuring that the reductant was uniformly suspended. After 5 min, the above crude 1-chloropropyl 4-methylbenzoate was dissolved in THF (0.3 mL) and transferred via syringe, rinsing with DME (0.3 mL). The mixture was stirred vigorously at 30 °C for 40 h. After that, the mixture was loaded directly onto a silica gel column (eluted with EtOAc/Petroleum ether) to give the target molecule (42.0 mg, 90% yield, 93% ee).

## II. Reference

1. L. H. Ulich and R. Adams, *J. Am. Chem. Soc.* **1921**, *43*, 660–667.
2. Z.-P. Yang and G. C. Fu, *J. Am. Chem. Soc.* **2020**, *142*, 5870–5875.
3. a) Y. He, C. Liu, L. Yu and S. Zhu, *Angew. Chem. Int. Ed.* **2020**, *59*, 21530 – 21534; b) X. Cheng, H. Lu, Z. Lu, *Nat. Commun.* **2019**, *10*, 3549.
4. a) M. Rouen, P. Chaumont, G. Barozzino-Consiglio, J. Maddaluno and A. Harrison-Marchand, *Chem. – Eur. J.*, **2018**, *24*, 9238–9242; b) Q. Wang, S. Li, C.-J. Hou, T.-T. Chu, X.-P. Hu, *Appl. Organomet. Chem.* **2019**, *33*, e5108.
5. a) R. Peters, Z.-q. Xin and F. Maier, *Chem. Asian J.* **2010**, *5*, 1770 – 1774; b) A. G. Myers, J. K. Barbay and B. Zhong, *J. Am. Chem. Soc.* **2001**, *123*, 7207–7219.

### III. HPLC Traces

#### 2: racemic

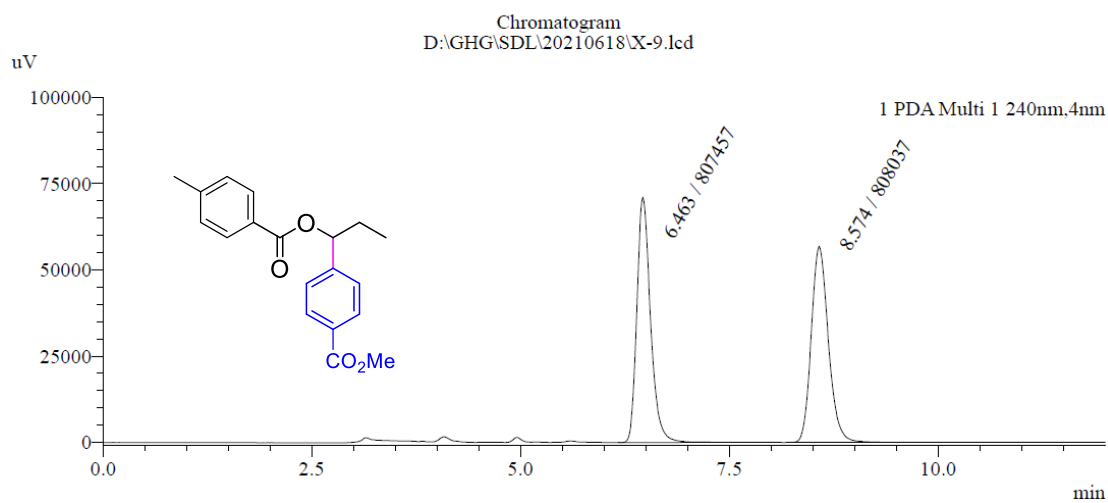

Peak Table

| Peak# | Ret. Time [min] | Width [min] | Area [uV*s] | Height [uV] | Area %  |
|-------|-----------------|-------------|-------------|-------------|---------|
| 1     | 6.463           | 0.1702      | 807456.63   | 70960.74    | 49.9821 |
| 2     | 8.574           | 0.2160      | 808036.58   | 56757.54    | 50.0179 |

PDA Ch1 240nm

#### 2: enantioenriched, 94% ee

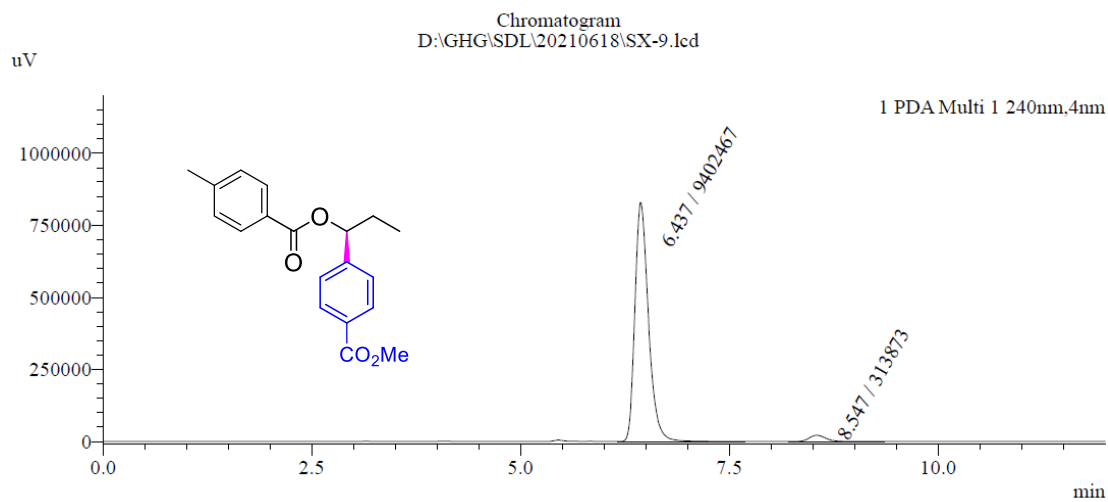

Peak Table

| Peak# | Ret. Time [min] | Width [min] | Area [uV*s] | Height [uV] | Area %  |
|-------|-----------------|-------------|-------------|-------------|---------|
| 1     | 6.437           | 0.1699      | 9402467.22  | 828808.77   | 96.7696 |
| 2     | 8.547           | 0.2149      | 313873.15   | 22098.45    | 3.2304  |

PDA Ch1 240nm

**3: enantioenriched, 94% ee**

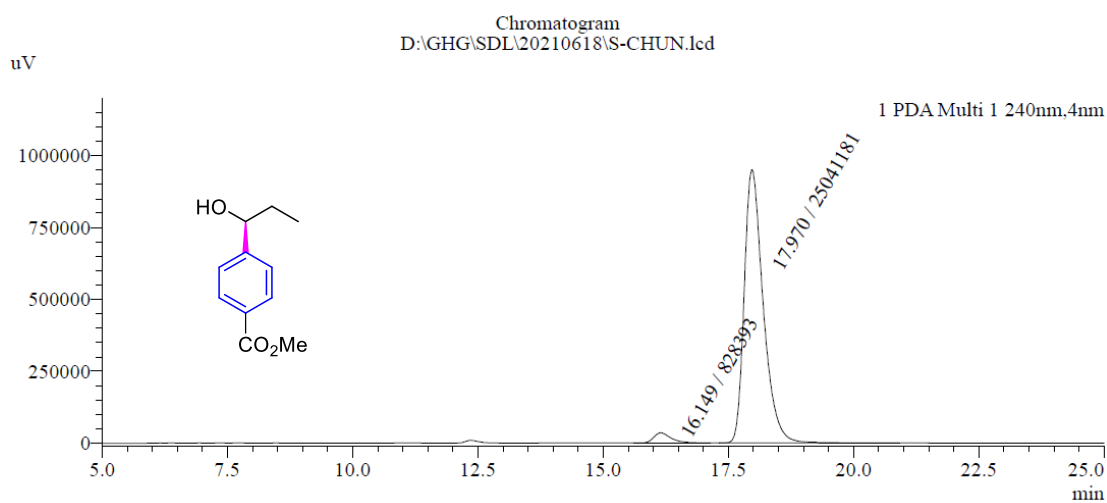

Peak Table

PDA Ch1 240nm

| Peak# | Ret. Time [min] | Width [min] | Area [uV*s] | Height [uV] | Area %  |
|-------|-----------------|-------------|-------------|-------------|---------|
| 1     | 16.149          | 0.3494      | 828392.77   | 35151.98    | 3.2022  |
| 2     | 17.970          | 0.3931      | 25041180.87 | 949814.00   | 96.7978 |

**(R)-3: enantioenriched, -94% ee**

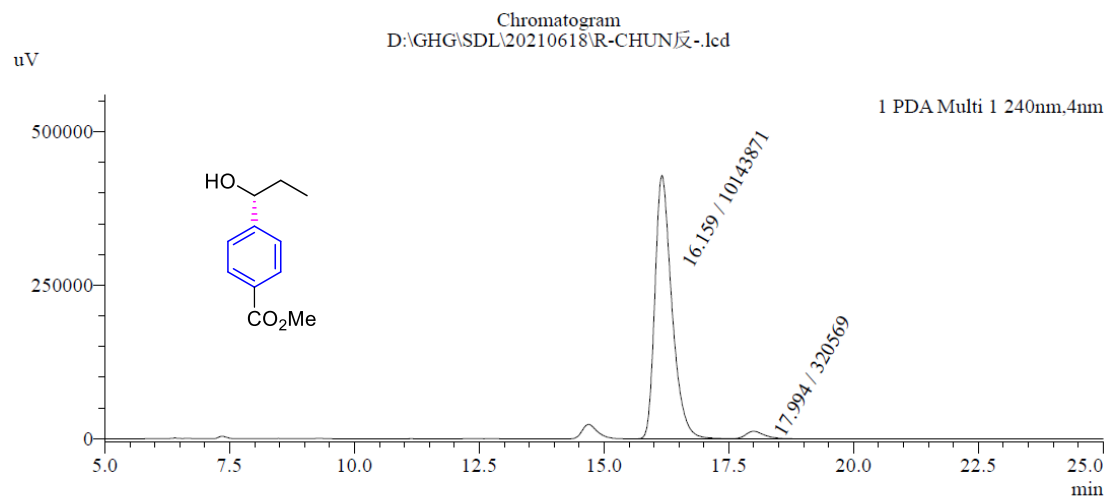

Peak Table

PDA Ch1 240nm

| Peak# | Ret. Time [min] | Width [min] | Area [uV*s] | Height [uV] | Area %  |
|-------|-----------------|-------------|-------------|-------------|---------|
| 1     | 16.159          | 0.3528      | 10143871.45 | 429133.47   | 96.9366 |
| 2     | 17.994          | 0.3866      | 320569.20   | 12351.87    | 3.0634  |

#### 4: racemic

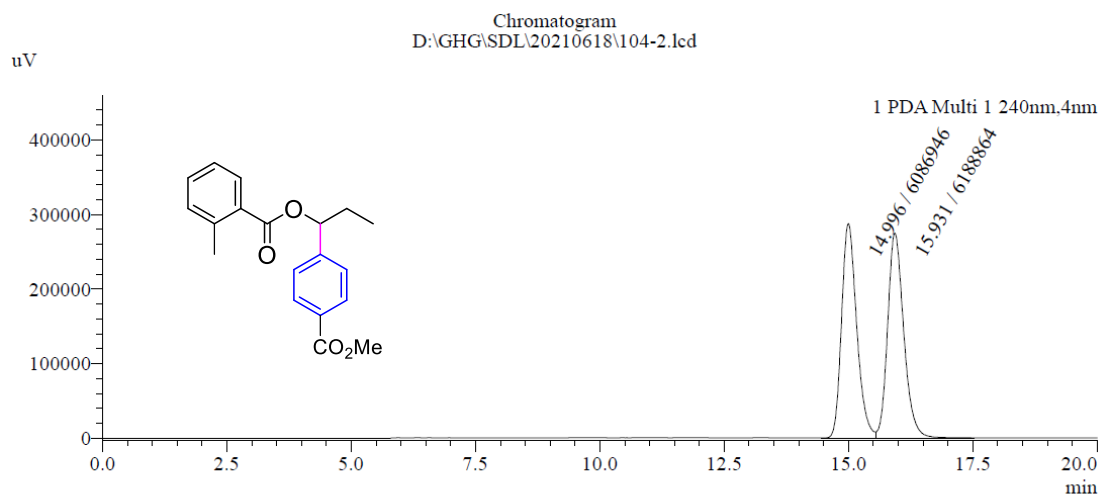

Peak Table

PDA Ch1 240nm

| Peak# | Ret. Time [min] | Width [min] | Area [uV*s] | Height [uV] | Area %  |
|-------|-----------------|-------------|-------------|-------------|---------|
| 1     | 14.996          | 0.3220      | 6086946.30  | 287786.87   | 49.5849 |
| 2     | 15.931          | 0.3394      | 6188863.54  | 274801.44   | 50.4151 |

#### 4: enantioenriched, 90% ee

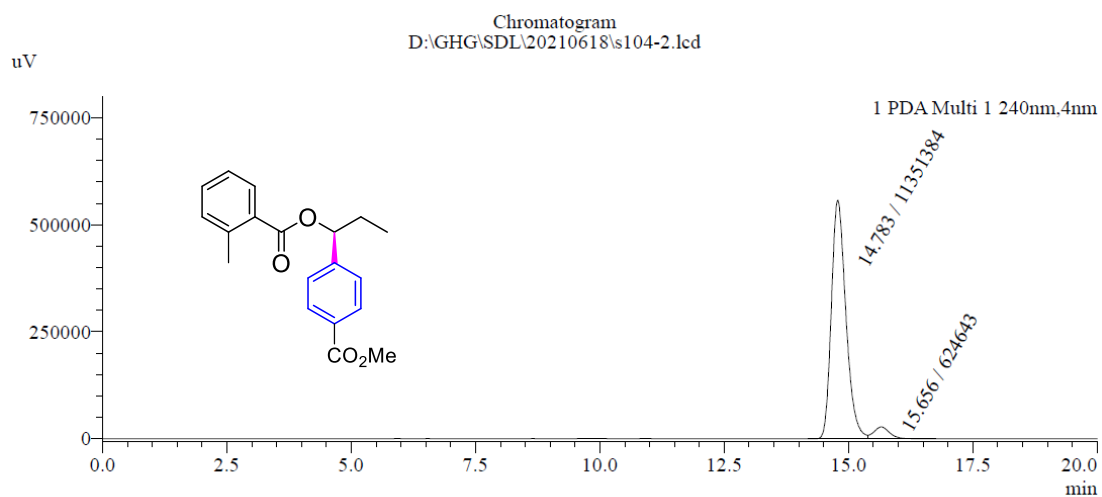

Peak Table

PDA Ch1 240nm

| Peak# | Ret. Time [min] | Width [min] | Area [uV*s] | Height [uV] | Area %  |
|-------|-----------------|-------------|-------------|-------------|---------|
| 1     | 14.783          | 0.3091      | 11351383.98 | 557602.29   | 94.7842 |
| 2     | 15.656          | 0.3437      | 624642.81   | 27979.51    | 5.2158  |

5: racemic

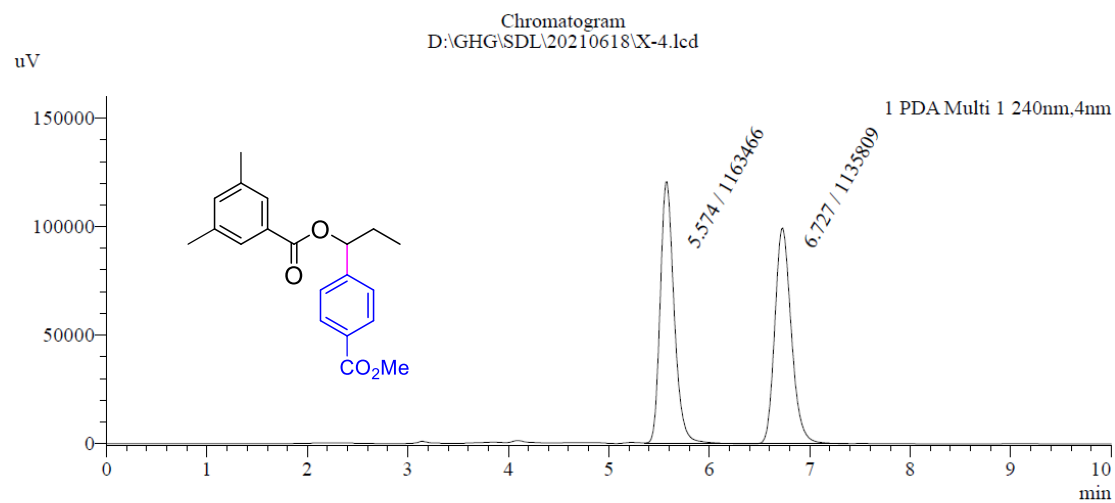

Peak Table

| Peak# | Ret. Time [min] | Width [min] | Area [uV*s] | Height [uV] | Area %  |
|-------|-----------------|-------------|-------------|-------------|---------|
| 1     | 5.574           | 0.1440      | 1163466.00  | 120660.77   | 50.6014 |
| 2     | 6.727           | 0.1731      | 1135809.39  | 99386.92    | 49.3986 |

5: enantioenriched, 92% ee

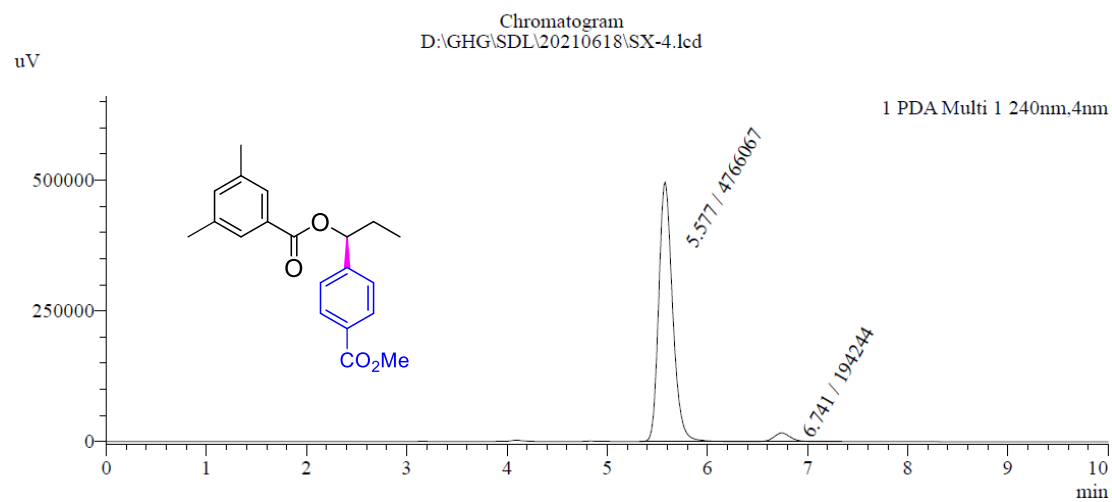

Peak Table

| Peak# | Ret. Time [min] | Width [min] | Area [uV*s] | Height [uV] | Area %  |
|-------|-----------------|-------------|-------------|-------------|---------|
| 1     | 5.577           | 0.1444      | 4766066.68  | 496099.20   | 96.0840 |
| 2     | 6.741           | 0.1750      | 194244.26   | 16571.48    | 3.9160  |



**6: racemic**

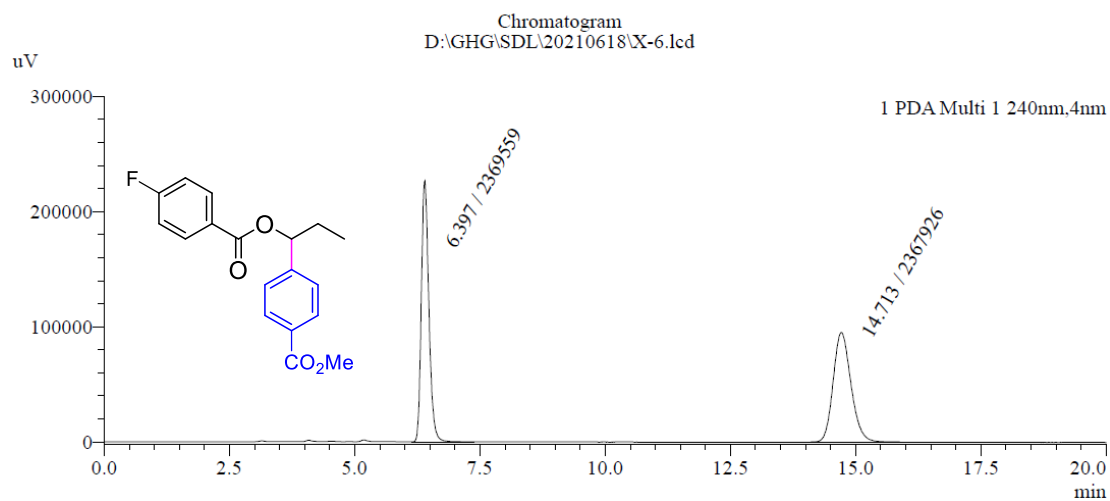

Peak Table

| Peak# | Ret. Time [min] | Width [min] | Area [uV*s] | Height [uV] | Area %  |
|-------|-----------------|-------------|-------------|-------------|---------|
| 1     | 6.397           | 0.1575      | 2369559.46  | 226710.64   | 50.0172 |
| 2     | 14.713          | 0.3796      | 2367926.20  | 95205.44    | 49.9828 |

**6: enantioenriched, 91% ee**

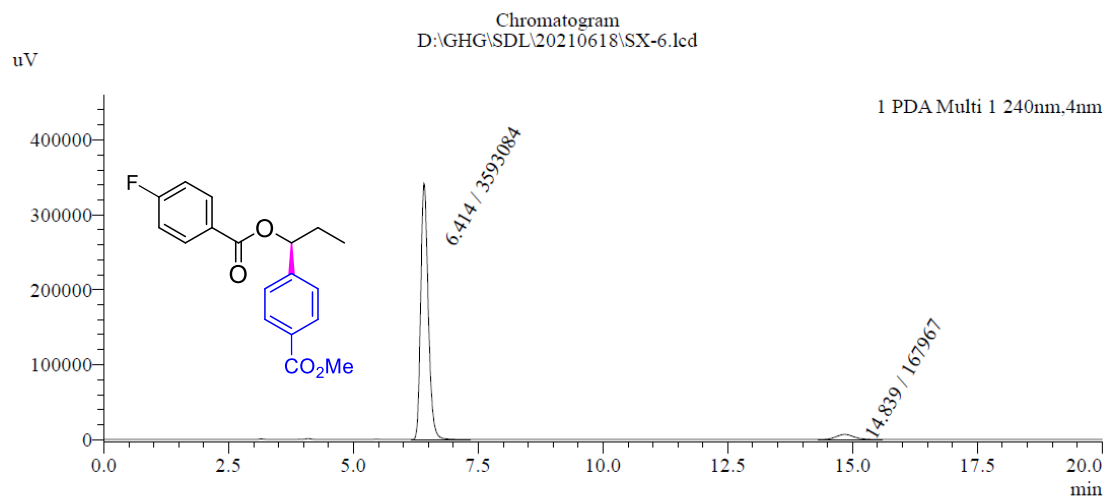

Peak Table

| Peak# | Ret. Time [min] | Width [min] | Area [uV*s] | Height [uV] | Area %  |
|-------|-----------------|-------------|-------------|-------------|---------|
| 1     | 6.414           | 0.1584      | 3593084.17  | 342434.81   | 95.5340 |
| 2     | 14.839          | 0.3804      | 167966.84   | 6798.81     | 4.4660  |

7: racemic

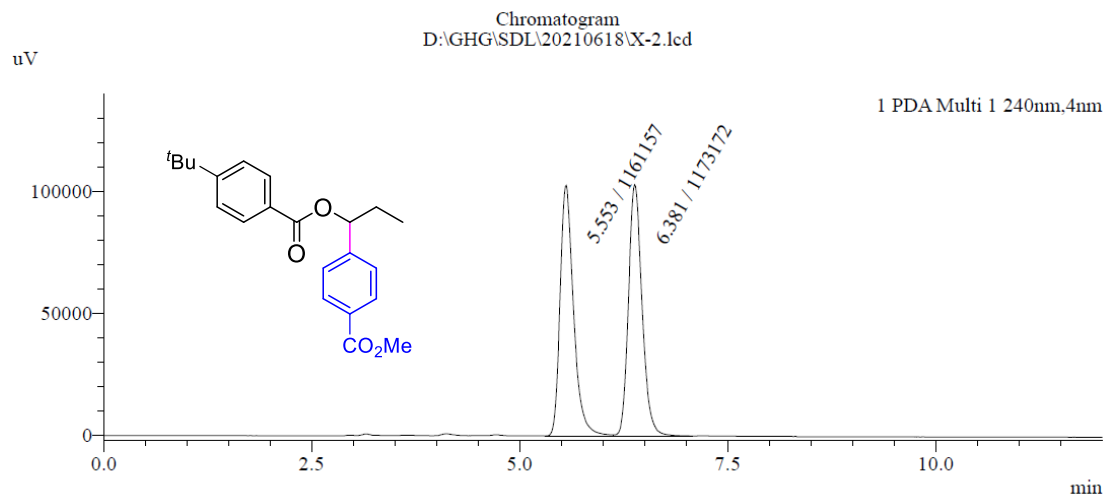

Peak Table

| Peak# | Ret. Time [min] | Width [min] | Area [uV*s] | Height [uV] | Area %  |
|-------|-----------------|-------------|-------------|-------------|---------|
| 1     | 5.553           | 0.1673      | 1161157.01  | 102741.94   | 49.7427 |
| 2     | 6.381           | 0.1724      | 1173171.61  | 103088.90   | 50.2573 |

7: enantioenriched, 92% ee

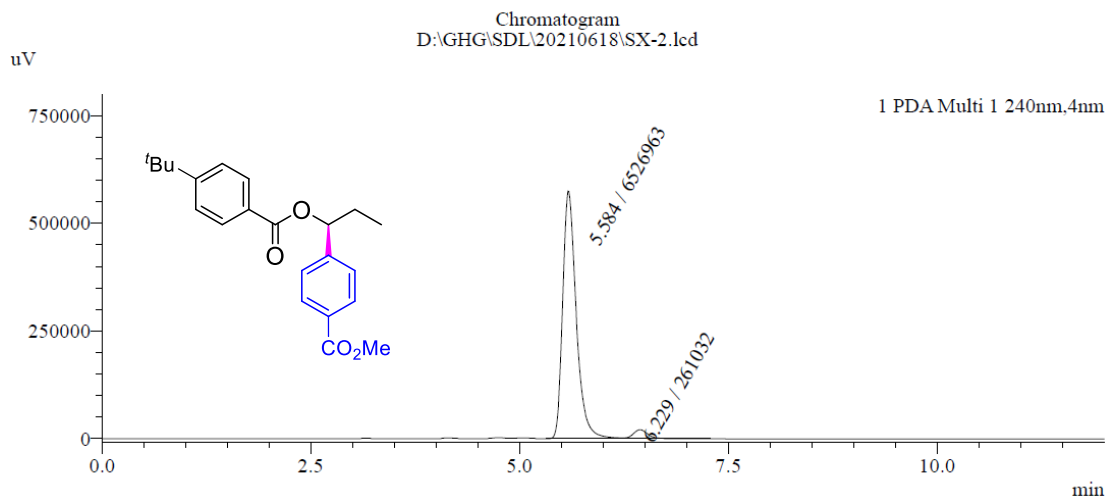

Peak Table

| Peak# | Ret. Time [min] | Width [min] | Area [uV*s] | Height [uV] | Area %  |
|-------|-----------------|-------------|-------------|-------------|---------|
| 1     | 5.584           | 0.1680      | 6526963.13  | 575240.31   | 96.1545 |
| 2     | 6.229           | --          | 261032.23   | 1812.74     | 3.8455  |

### 8: racemic

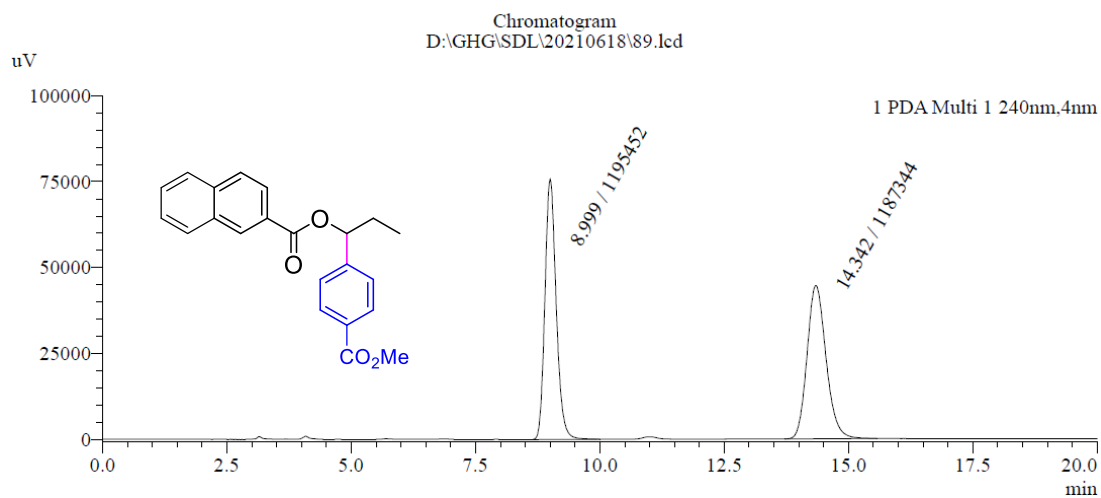

Peak Table

PDA Ch1 240nm

| Peak# | Ret. Time [min] | Width [min] | Area [uV*s] | Height [uV] | Area %  |
|-------|-----------------|-------------|-------------|-------------|---------|
| 1     | 8.999           | 0.2389      | 1195451.79  | 75783.86    | 50.1701 |
| 2     | 14.342          | 0.4053      | 1187343.76  | 44646.75    | 49.8299 |

### 8: enantioenriched, 90% ee

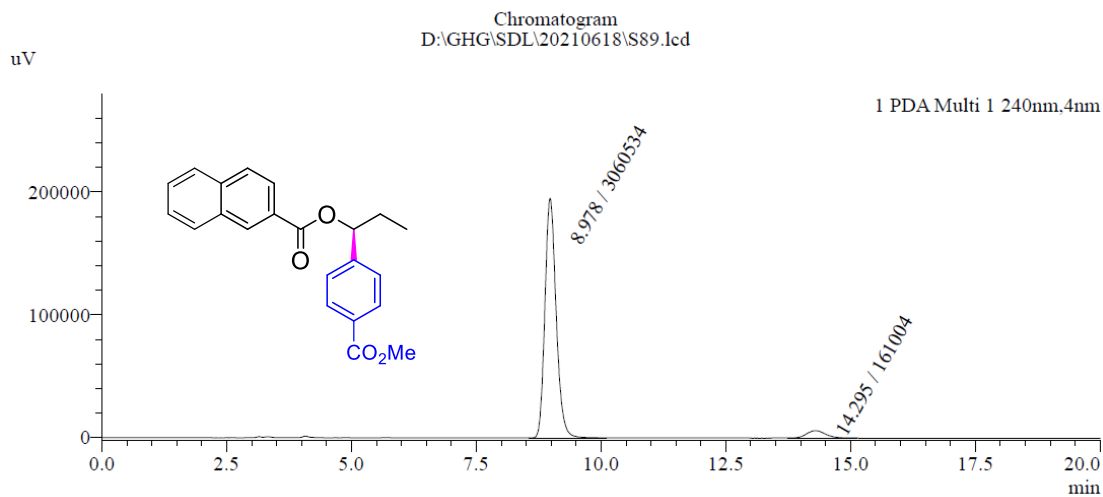

Peak Table

PDA Ch1 240nm

| Peak# | Ret. Time [min] | Width [min] | Area [uV*s] | Height [uV] | Area %  |
|-------|-----------------|-------------|-------------|-------------|---------|
| 1     | 8.978           | 0.2380      | 3060533.56  | 194997.35   | 95.0023 |
| 2     | 14.295          | 0.4047      | 161004.14   | 6111.19     | 4.9977  |

**9: racemic**

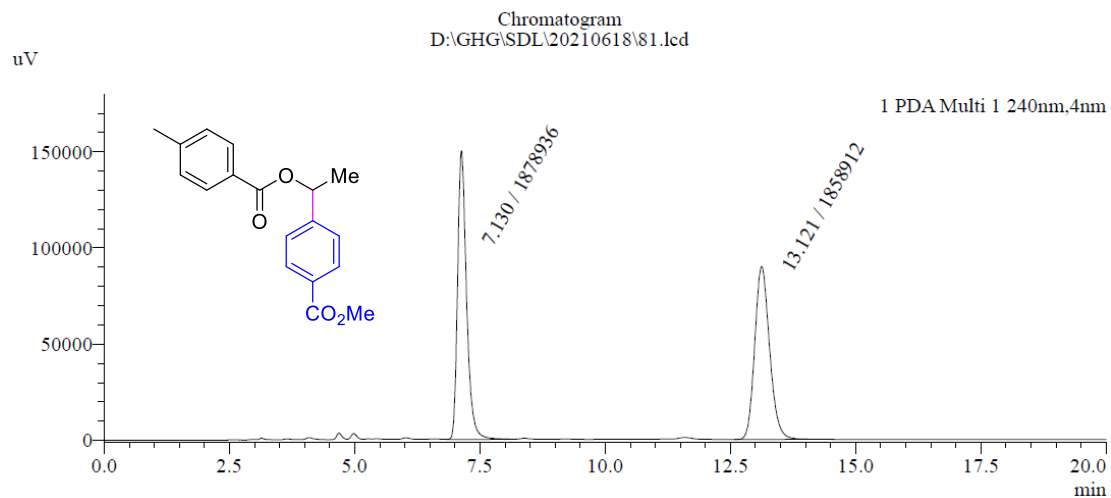

Peak Table

| Peak# | Ret. Time [min] | Width [min] | Area [uV*s] | Height [uV] | Area %  |
|-------|-----------------|-------------|-------------|-------------|---------|
| 1     | 7.130           | 0.1849      | 1878935.81  | 150034.72   | 50.2679 |
| 2     | 13.121          | 0.3150      | 1858911.51  | 89907.14    | 49.7321 |

**9: enantioenriched, 93% ee**

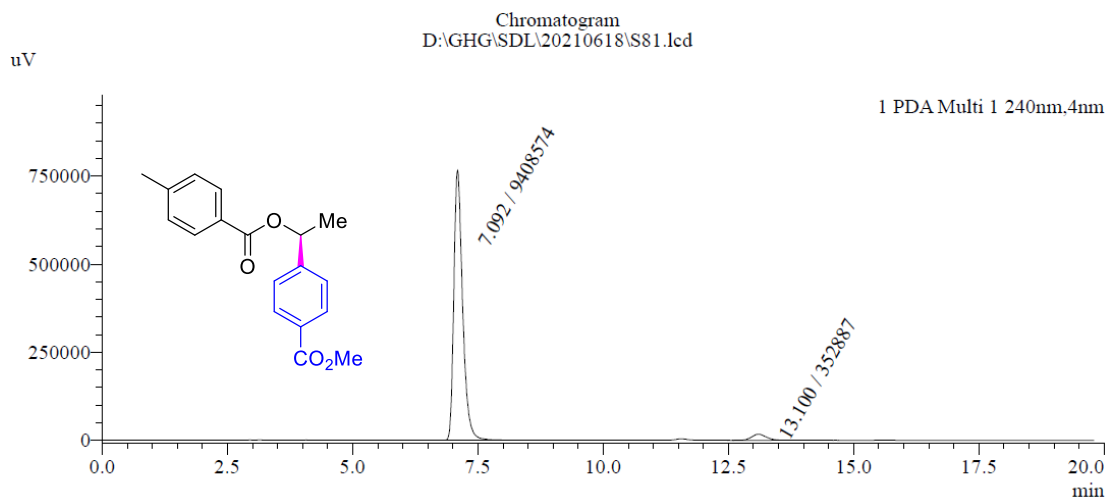

Peak Table

| Peak# | Ret. Time [min] | Width [min] | Area [uV*s] | Height [uV] | Area %  |
|-------|-----------------|-------------|-------------|-------------|---------|
| 1     | 7.092           | 0.1828      | 9408573.79  | 765530.06   | 96.3849 |
| 2     | 13.100          | 0.3149      | 352887.43   | 17161.67    | 3.6151  |

**10: racemic**

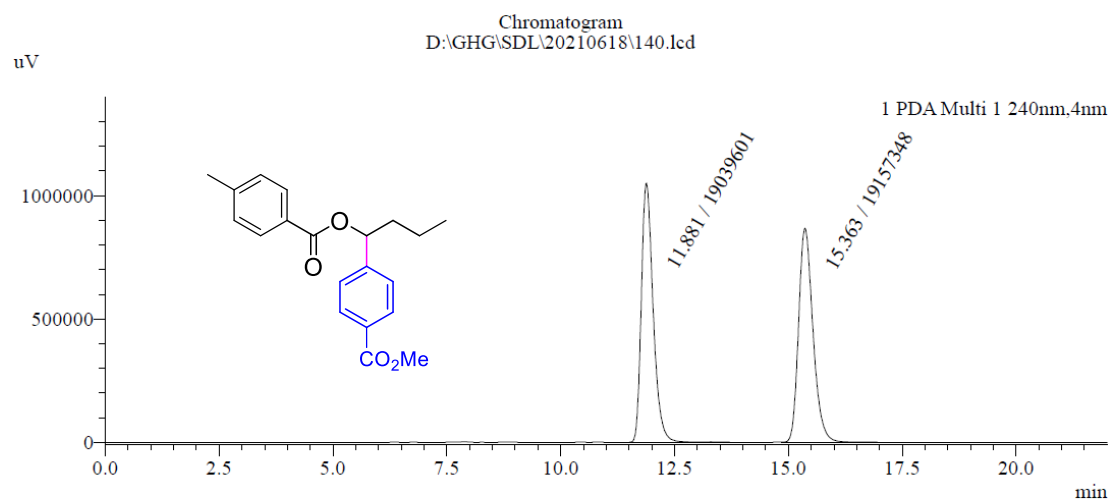

Peak Table

| PDA Ch1 240nm |                 |             |             |             |         |
|---------------|-----------------|-------------|-------------|-------------|---------|
| Peak#         | Ret. Time [min] | Width [min] | Area [uV*s] | Height [uV] | Area %  |
| 1             | 11.881          | 0.2720      | 19039601.22 | 1050821.53  | 49.8459 |
| 2             | 15.363          | 0.3335      | 19157347.54 | 868151.72   | 50.1541 |

**10: enantioenriched, 92% ee**

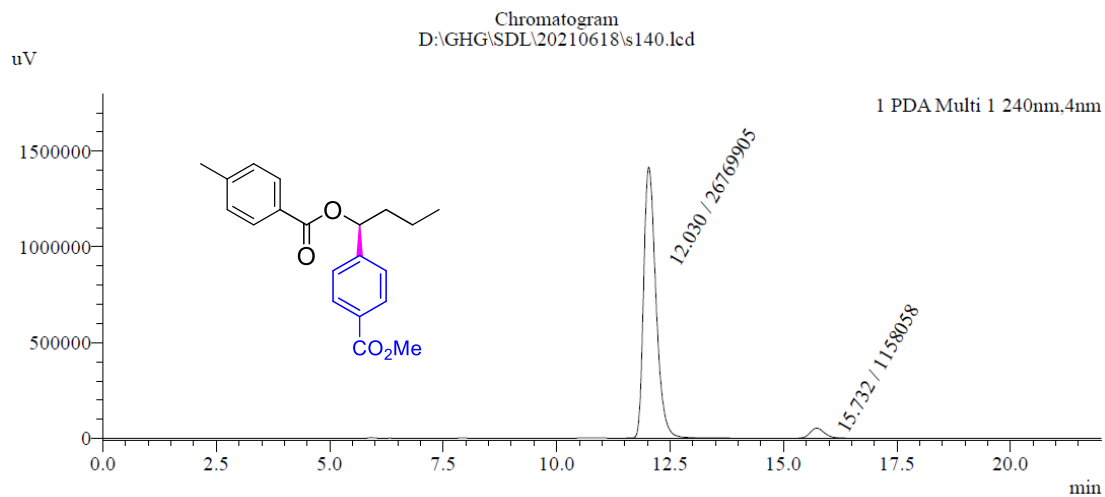

Peak Table

| PDA Ch1 240nm |                 |             |             |             |         |
|---------------|-----------------|-------------|-------------|-------------|---------|
| Peak#         | Ret. Time [min] | Width [min] | Area [uV*s] | Height [uV] | Area %  |
| 1             | 12.030          | 0.2864      | 26769904.54 | 1415503.45  | 95.8534 |
| 2             | 15.732          | 0.3348      | 1158058.13  | 52410.93    | 4.1466  |

## 11: racemic

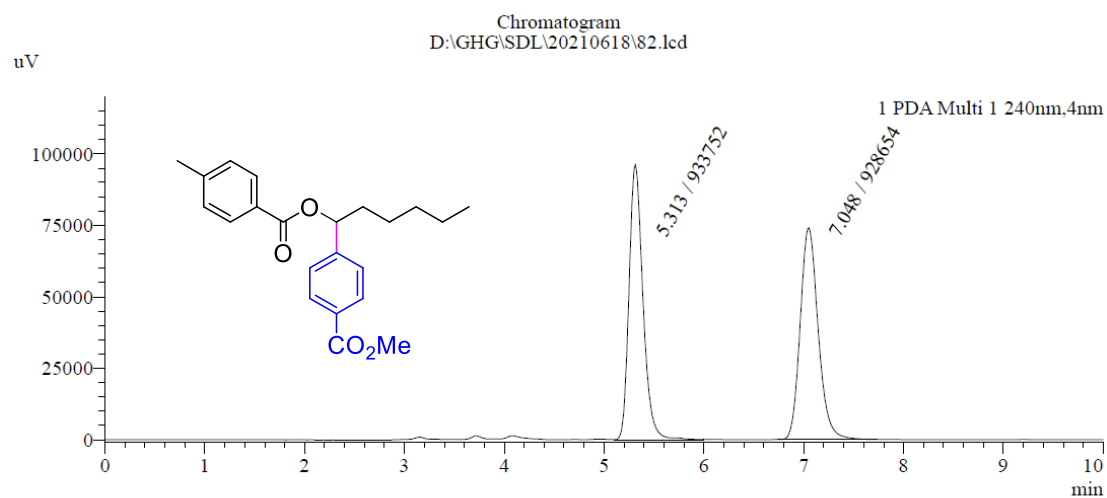

Peak Table

| Peak# | Ret. Time [min] | Width [min] | Area [uV*s] | Height [uV] | Area %  |
|-------|-----------------|-------------|-------------|-------------|---------|
| 1     | 5.313           | 0.1454      | 933751.69   | 96227.58    | 50.1369 |
| 2     | 7.048           | 0.1899      | 928653.90   | 74060.73    | 49.8631 |

## 11: enantioenriched, 93% ee

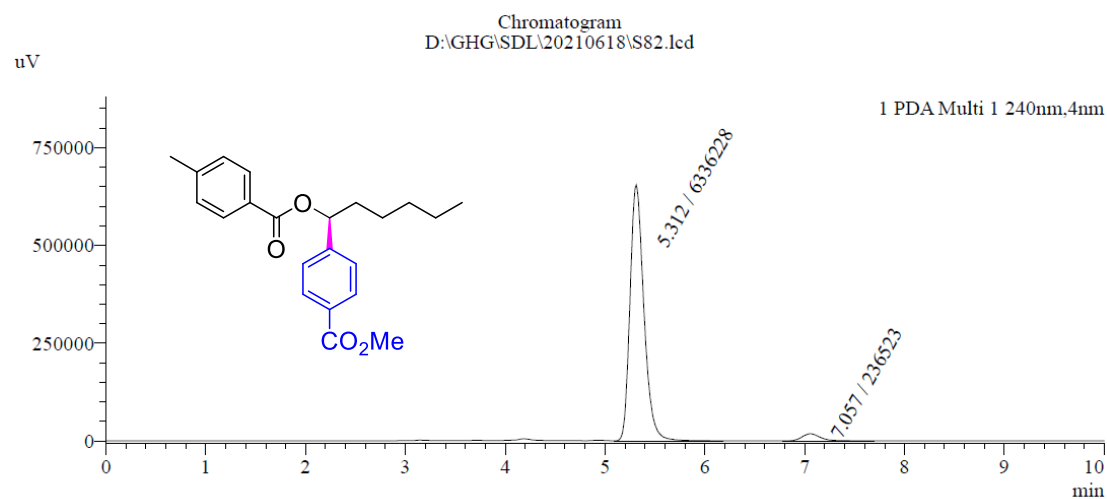

Peak Table

| Peak# | Ret. Time [min] | Width [min] | Area [uV*s] | Height [uV] | Area %  |
|-------|-----------------|-------------|-------------|-------------|---------|
| 1     | 5.312           | 0.1457      | 6336227.81  | 654464.77   | 96.4015 |
| 2     | 7.057           | 0.1904      | 236522.76   | 18436.20    | 3.5985  |

**12: racemic**

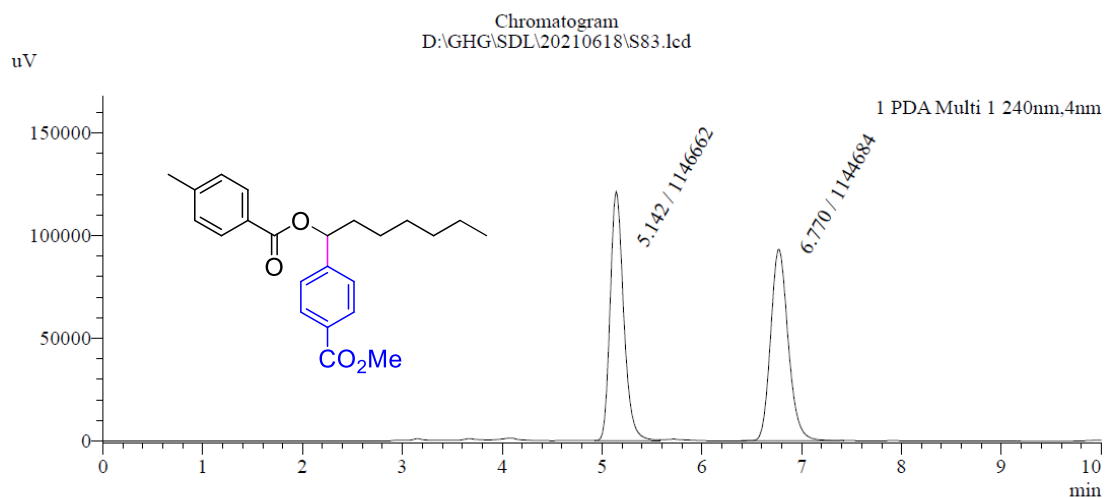

Peak Table

| Peak# | Ret. Time [min] | Width [min] | Area [uV*s] | Height [uV] | Area %  |
|-------|-----------------|-------------|-------------|-------------|---------|
| 1     | 5.142           | 0.1423      | 1146662.30  | 121428.39   | 50.0432 |
| 2     | 6.770           | 0.1864      | 1144683.51  | 93323.02    | 49.9568 |

**12: enantioenriched, 91% ee**

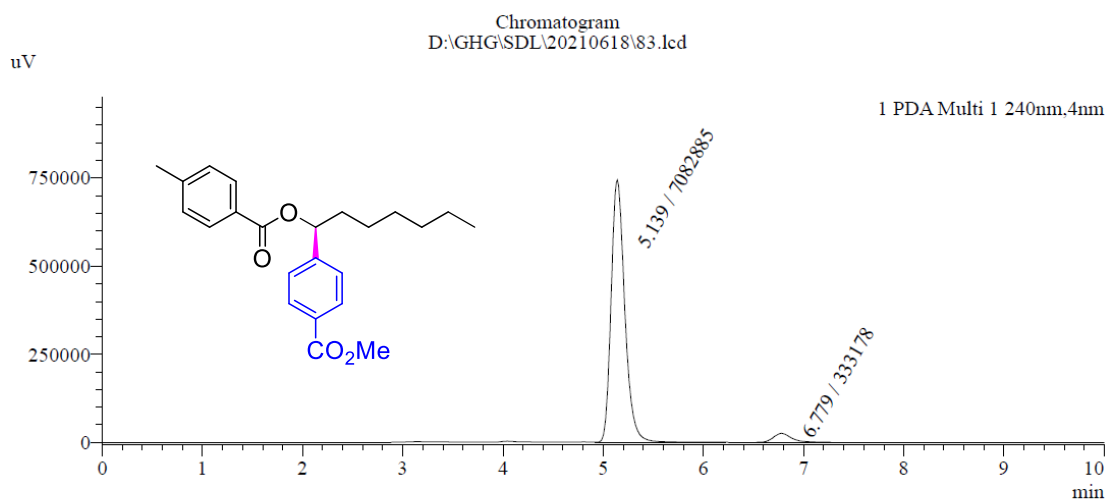

Peak Table

| Peak# | Ret. Time [min] | Width [min] | Area [uV*s] | Height [uV] | Area %  |
|-------|-----------------|-------------|-------------|-------------|---------|
| 1     | 5.139           | 0.1428      | 7082885.39  | 745379.42   | 95.5074 |
| 2     | 6.779           | 0.1892      | 333177.57   | 25606.21    | 4.4926  |

**13: racemic**

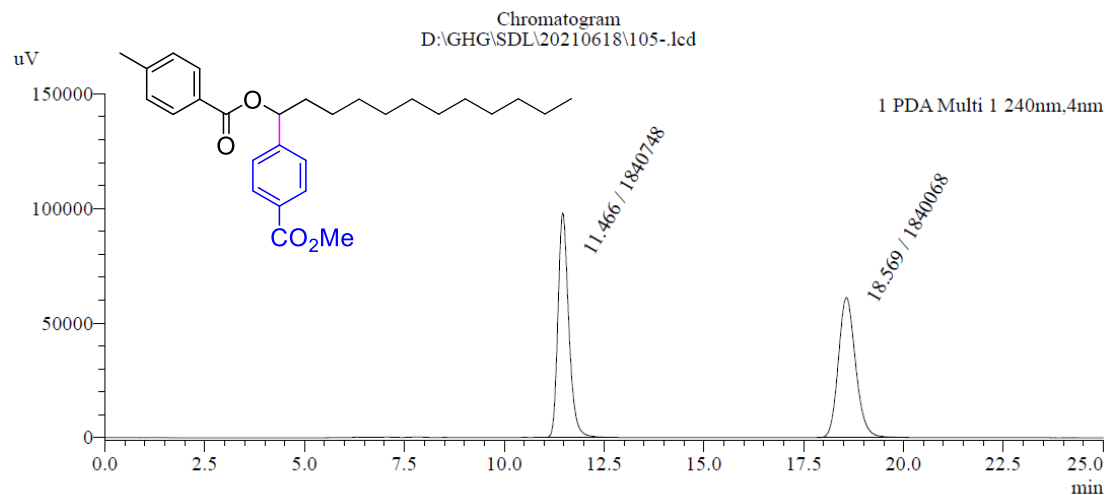

Peak Table

| Peak# | Ret. Time [min] | Width [min] | Area [uV*s] | Height [uV] | Area %  |
|-------|-----------------|-------------|-------------|-------------|---------|
| 1     | 11.466          | 0.2820      | 1840747.70  | 97840.41    | 50.0092 |
| 2     | 18.569          | 0.4577      | 1840067.60  | 61146.96    | 49.9908 |

**13: enantioenriched, 91% ee**

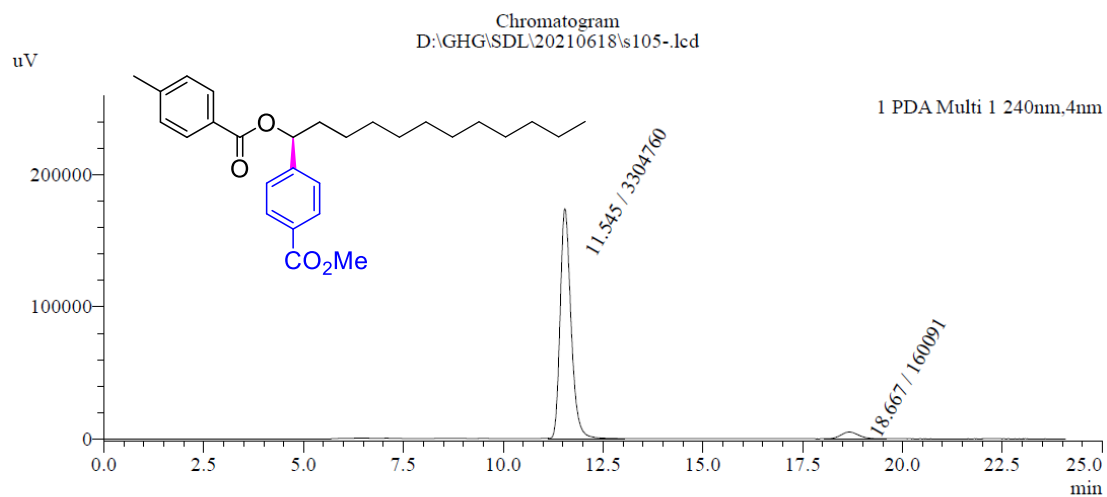

Peak Table

| Peak# | Ret. Time [min] | Width [min] | Area [uV*s] | Height [uV] | Area %  |
|-------|-----------------|-------------|-------------|-------------|---------|
| 1     | 11.545          | 0.2839      | 3304760.46  | 174176.44   | 95.3796 |
| 2     | 18.667          | 0.4762      | 160091.24   | 5173.46     | 4.6204  |



**14: racemic**

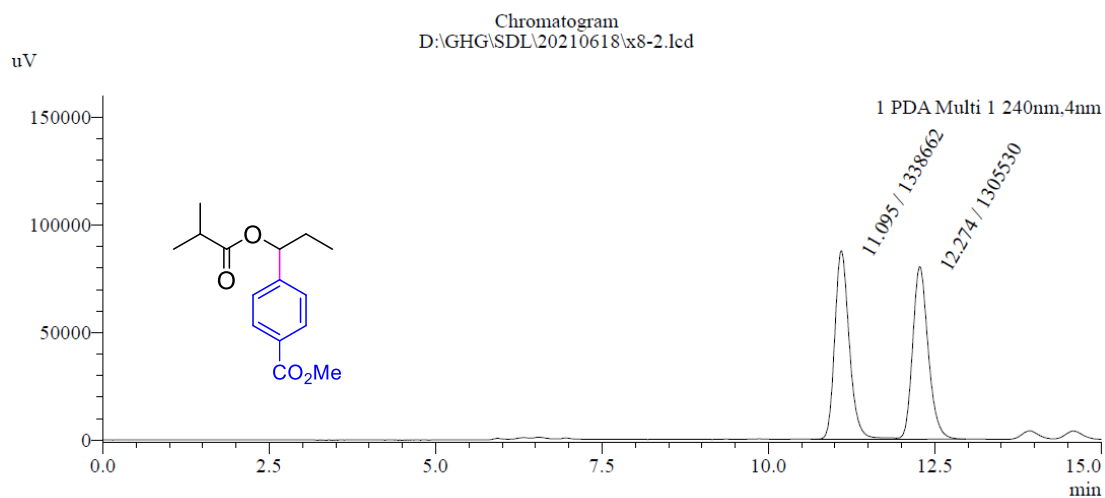

Peak Table

| Peak# | Ret. Time [min] | Width [min] | Area [uV*s] | Height [uV] | Area %  |
|-------|-----------------|-------------|-------------|-------------|---------|
| 1     | 11.095          | 0.2276      | 1338662.36  | 87725.39    | 50.6265 |
| 2     | 12.274          | 0.2464      | 1305530.40  | 80170.34    | 49.3735 |

**14: enantioenriched, 84% ee**

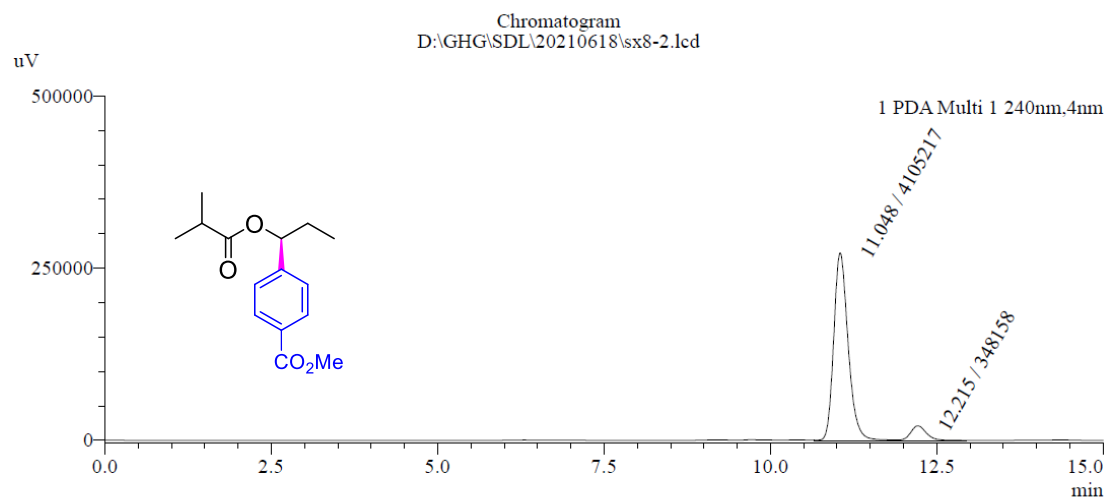

Peak Table

| Peak# | Ret. Time [min] | Width [min] | Area [uV*s] | Height [uV] | Area %  |
|-------|-----------------|-------------|-------------|-------------|---------|
| 1     | 11.048          | 0.2263      | 4105216.77  | 272506.07   | 92.1822 |
| 2     | 12.215          | 0.2448      | 348158.16   | 21302.34    | 7.8178  |

15: racemic

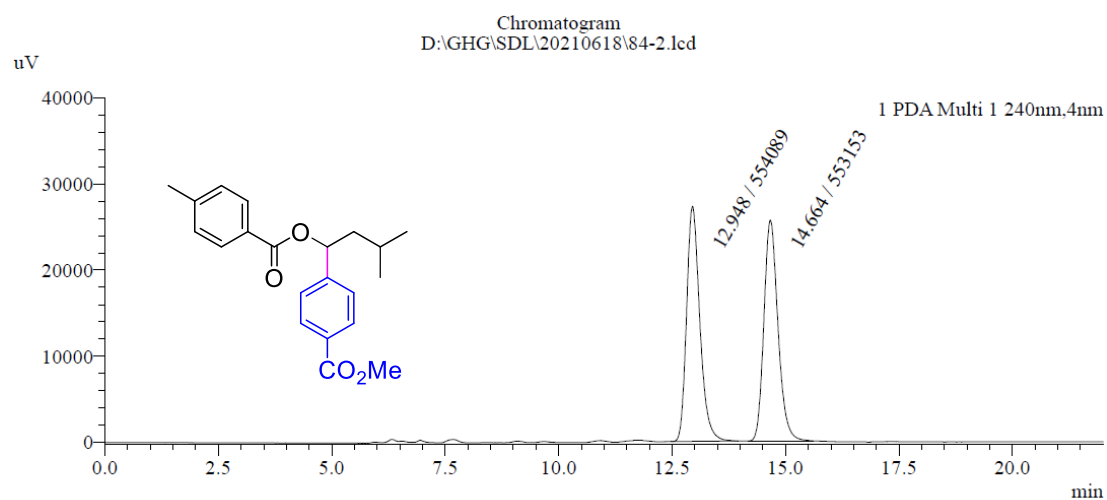

Peak Table

| Peak# | Ret. Time [min] | Width [min] | Area [uV*s] | Height [uV] | Area %  |
|-------|-----------------|-------------|-------------|-------------|---------|
| 1     | 12.948          | 0.3054      | 554089.39   | 27269.66    | 50.0423 |
| 2     | 14.664          | 0.3271      | 553152.92   | 25639.07    | 49.9577 |

15: enantioenriched, 93% ee

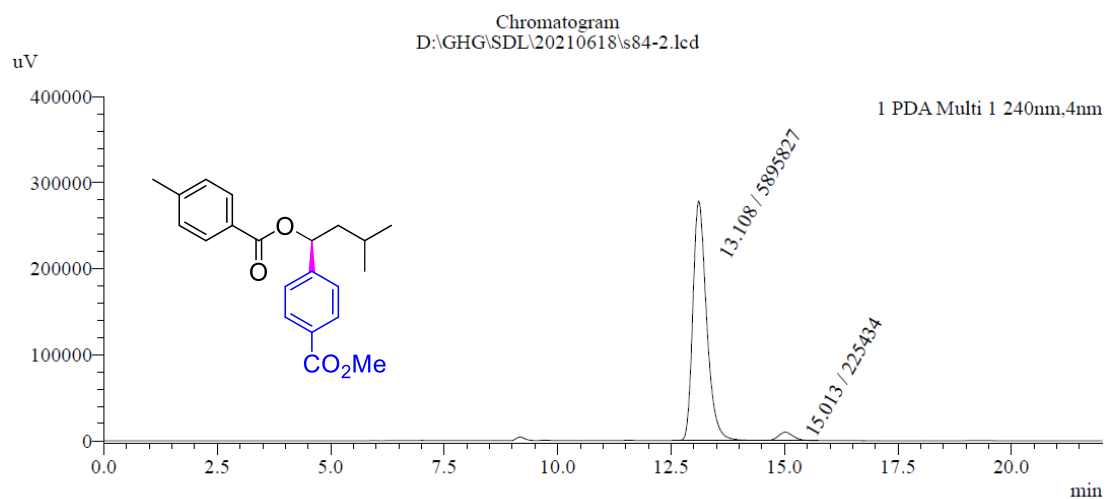

Peak Table

| Peak# | Ret. Time [min] | Width [min] | Area [uV*s] | Height [uV] | Area %  |
|-------|-----------------|-------------|-------------|-------------|---------|
| 1     | 13.108          | 0.3165      | 5895826.93  | 278739.95   | 96.3172 |
| 2     | 15.013          | 0.3459      | 225434.04   | 9873.20     | 3.6828  |

**16: racemic**

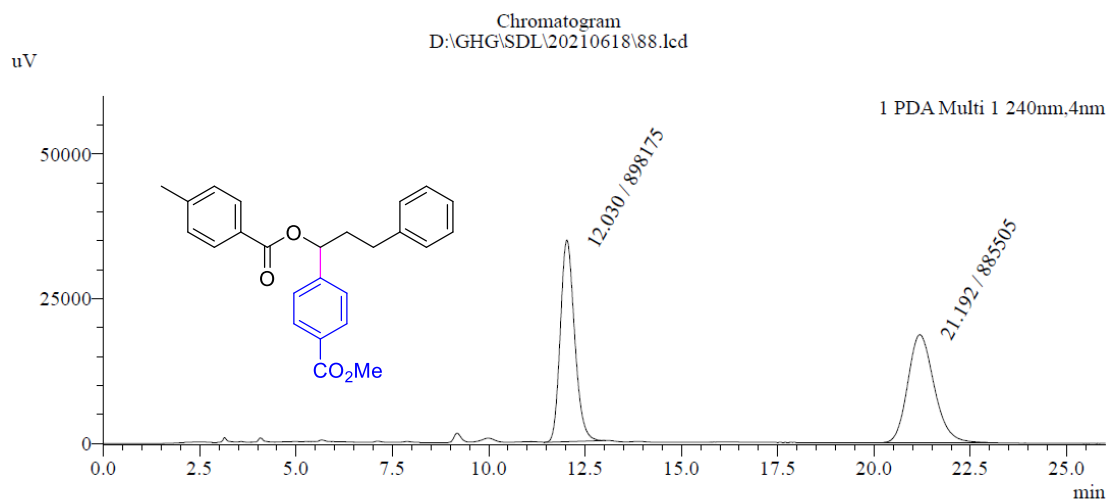

Peak Table

| Peak# | Ret. Time [min] | Width [min] | Area [uV*s] | Height [uV] | Area %  |
|-------|-----------------|-------------|-------------|-------------|---------|
| 1     | 12.030          | 0.3936      | 898175.24   | 34850.64    | 50.3552 |
| 2     | 21.192          | 0.7255      | 885504.92   | 18651.37    | 49.6448 |

**16: enantioenriched, 85% ee**

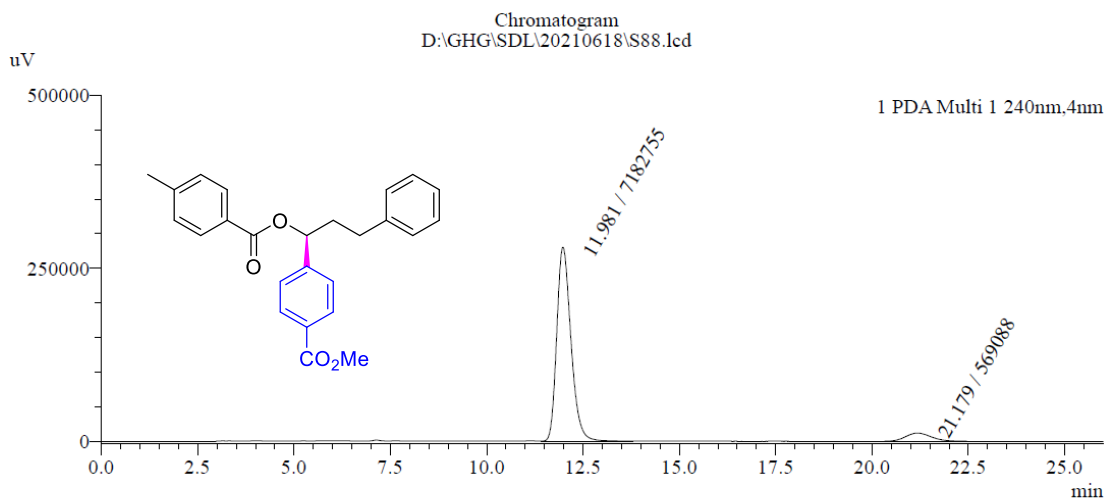

Peak Table

| Peak# | Ret. Time [min] | Width [min] | Area [uV*s] | Height [uV] | Area %  |
|-------|-----------------|-------------|-------------|-------------|---------|
| 1     | 11.981          | 0.3887      | 7182755.29  | 280362.94   | 92.6587 |
| 2     | 21.179          | 0.7243      | 569087.55   | 12043.88    | 7.3413  |

**17: racemic**

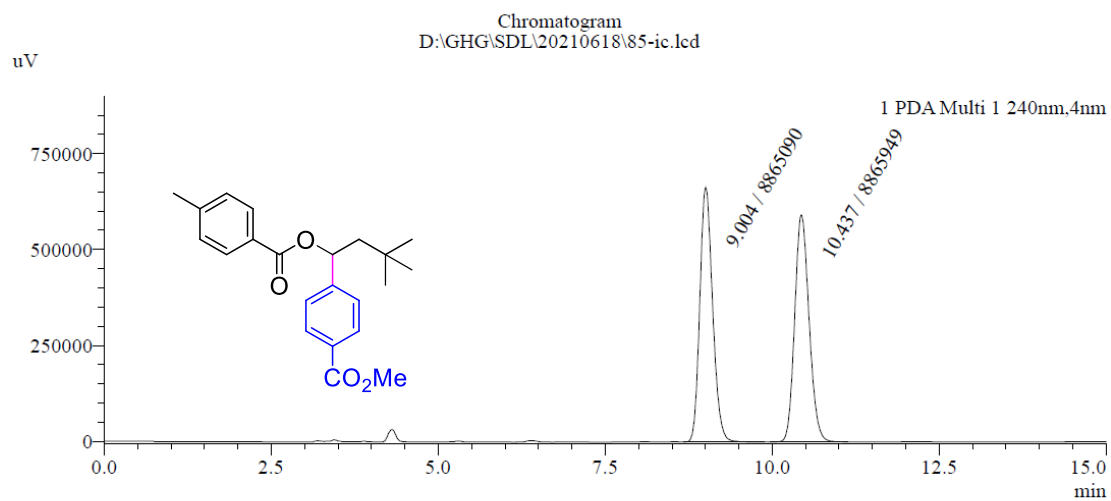

Peak Table

PDA Ch1 240nm

| Peak# | Ret. Time [min] | Width [min] | Area [uV*s] | Height [uV] | Area %  |
|-------|-----------------|-------------|-------------|-------------|---------|
| 1     | 9.004           | 0.2050      | 8865090.28  | 664713.63   | 49.9976 |
| 2     | 10.437          | 0.2311      | 8865948.65  | 591708.35   | 50.0024 |

**17: enantioenriched, 92% ee**

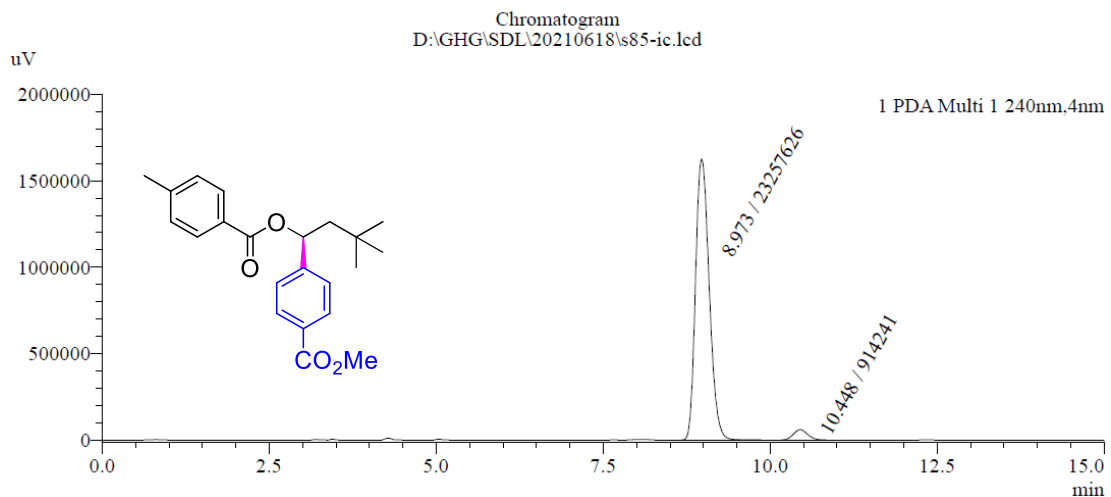

Peak Table

PDA Ch1 240nm

| Peak# | Ret. Time [min] | Width [min] | Area [uV*s] | Height [uV] | Area %  |
|-------|-----------------|-------------|-------------|-------------|---------|
| 1     | 8.973           | 0.2222      | 23257625.54 | 1626248.69  | 96.2177 |
| 2     | 10.448          | 0.2320      | 914241.28   | 60868.76    | 3.7823  |

**18: racemic**

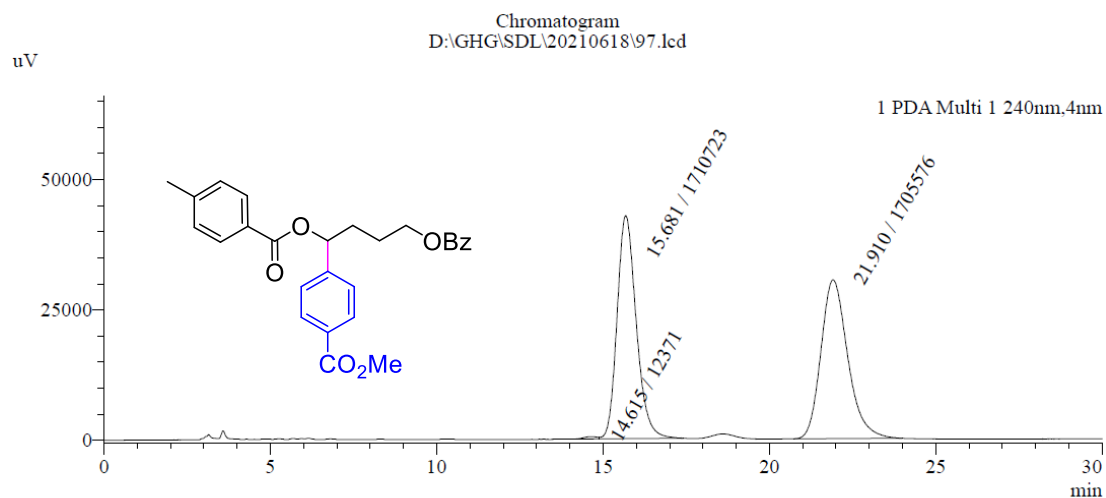

Peak Table

PDA Ch1 240nm

| Peak# | Ret. Time [min] | Width [min] | Area [uV*s] | Height [uV] | Area %  |
|-------|-----------------|-------------|-------------|-------------|---------|
| 1     | 14.615          | --          | 12370.65    | 452.66      | 0.3608  |
| 2     | 15.681          | 0.6069      | 1710722.93  | 42741.37    | 49.8947 |
| 3     | 21.910          | 0.8480      | 1705576.35  | 30413.00    | 49.7445 |

**18: enantioenriched, 90% ee**

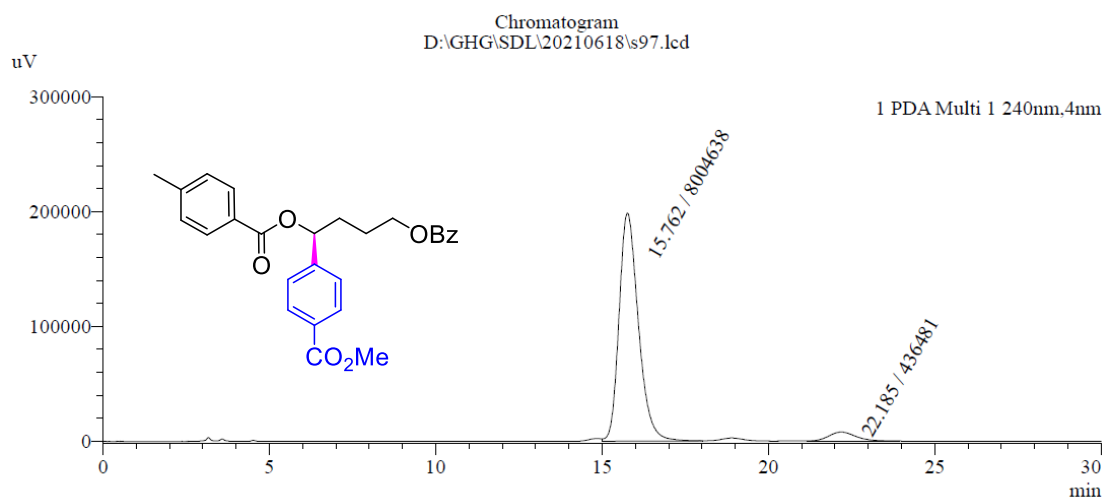

Peak Table

PDA Ch1 240nm

| Peak# | Ret. Time [min] | Width [min] | Area [uV*s] | Height [uV] | Area %  |
|-------|-----------------|-------------|-------------|-------------|---------|
| 1     | 15.762          | 0.6095      | 8004638.48  | 198534.31   | 94.8291 |
| 2     | 22.185          | 0.8620      | 436481.45   | 7761.48     | 5.1709  |

**19: racemic**

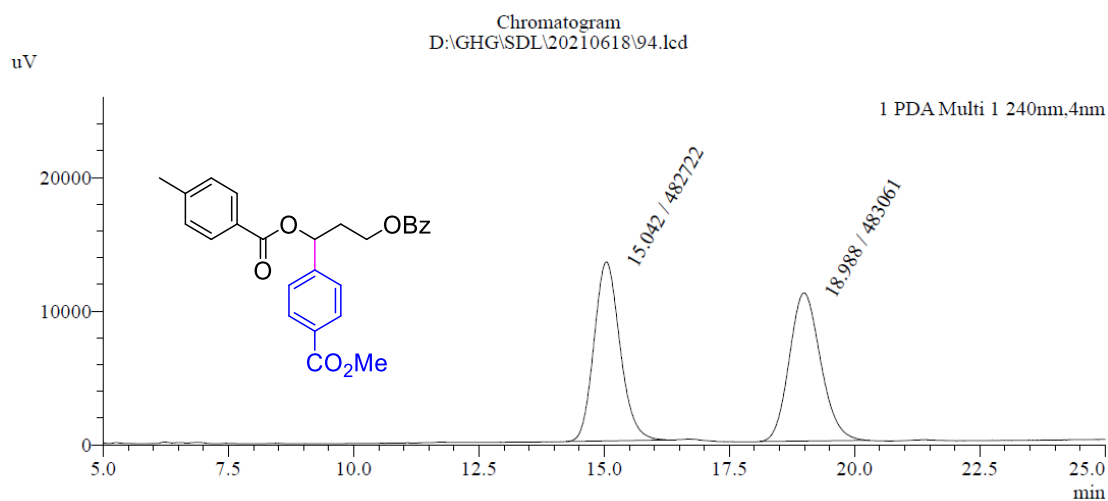

Peak Table

| PDA Ch1 240nm |                 |             |             |             |         |
|---------------|-----------------|-------------|-------------|-------------|---------|
| Peak#         | Ret. Time [min] | Width [min] | Area [uV*s] | Height [uV] | Area %  |
| 1             | 15.042          | 0.5527      | 482721.94   | 13387.08    | 49.9824 |
| 2             | 18.988          | 0.6731      | 483061.41   | 11073.95    | 50.0176 |

**19: enantioenriched, 88% ee**

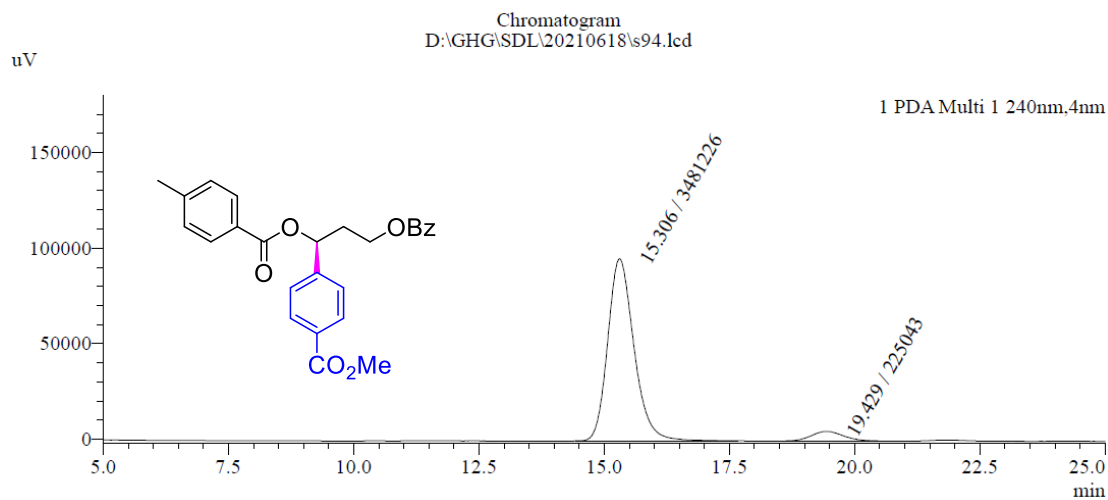

Peak Table

| PDA Ch1 240nm |                 |             |             |             |         |
|---------------|-----------------|-------------|-------------|-------------|---------|
| Peak#         | Ret. Time [min] | Width [min] | Area [uV*s] | Height [uV] | Area %  |
| 1             | 15.306          | 0.5491      | 3481226.39  | 95344.29    | 93.9280 |
| 2             | 19.429          | 0.6951      | 225043.30   | 5020.78     | 6.0720  |

## 20: racemic

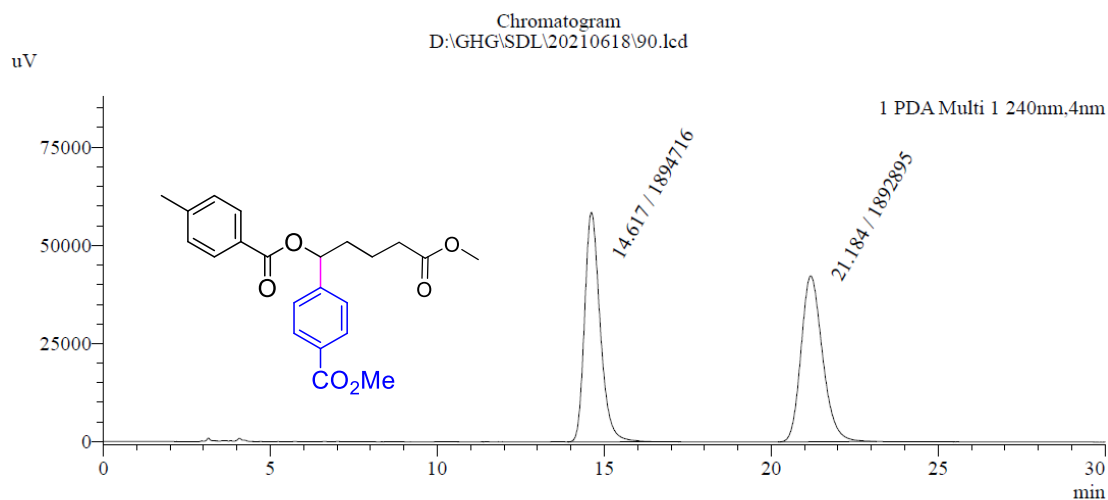

Peak Table

PDA Ch1 240nm

| Peak# | Ret. Time [min] | Width [min] | Area [uV*s] | Height [uV] | Area %  |
|-------|-----------------|-------------|-------------|-------------|---------|
| 1     | 14.617          | 0.4863      | 1894716.02  | 58510.19    | 50.0240 |
| 2     | 21.184          | 0.6813      | 1892895.25  | 42286.63    | 49.9760 |

## 20: enantioenriched, 92% ee

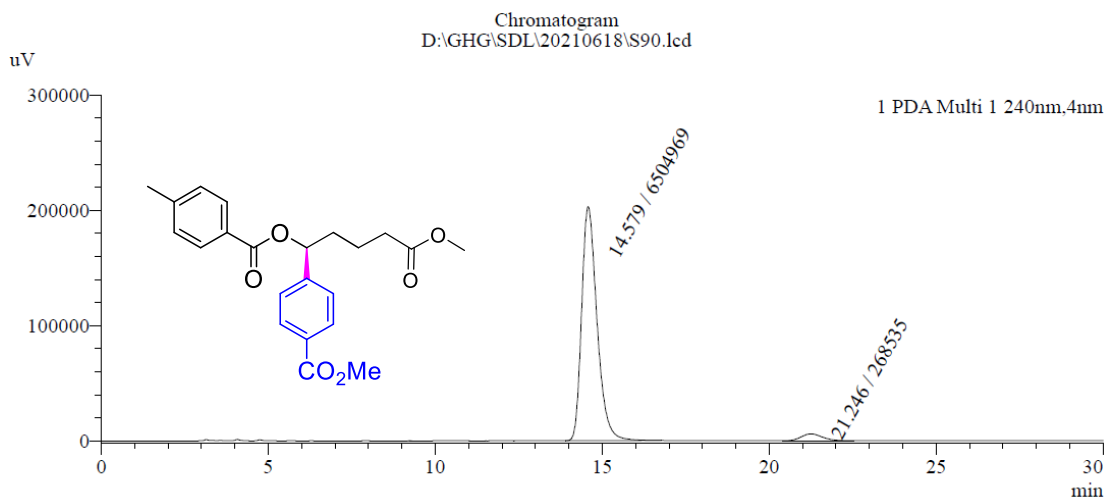

Peak Table

PDA Ch1 240nm

| Peak# | Ret. Time [min] | Width [min] | Area [uV*s] | Height [uV] | Area %  |
|-------|-----------------|-------------|-------------|-------------|---------|
| 1     | 14.579          | 0.4819      | 6504968.97  | 203054.85   | 96.0355 |
| 2     | 21.246          | 0.6879      | 268535.46   | 6007.25     | 3.9645  |

**21: racemic**

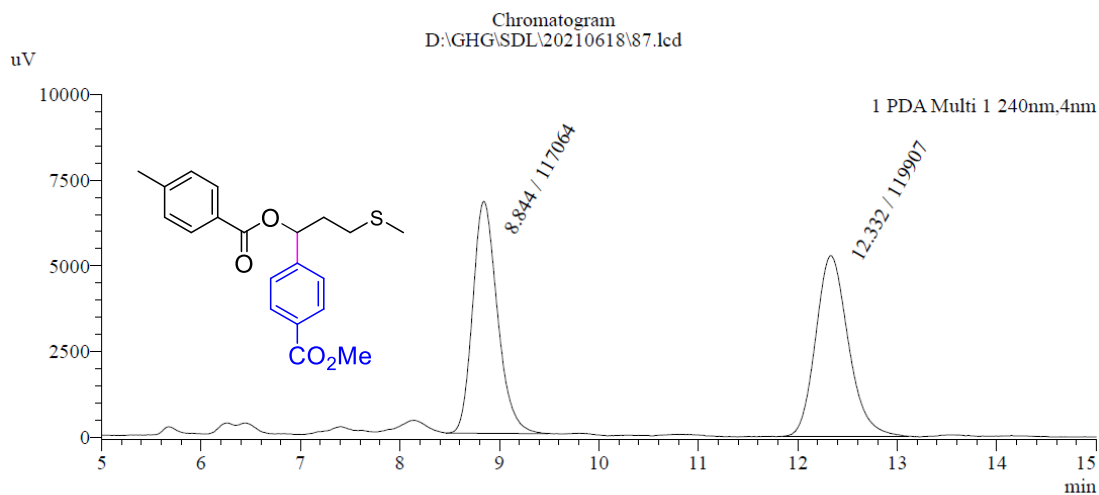

Peak Table

| Peak# | Ret. Time [min] | Width [min] | Area [uV*s] | Height [uV] | Area %  |
|-------|-----------------|-------------|-------------|-------------|---------|
| 1     | 8.844           | 0.2631      | 117063.66   | 6763.65     | 49.4001 |
| 2     | 12.332          | 0.3467      | 119907.04   | 5260.53     | 50.5999 |

**21: enantioenriched, 86% ee**

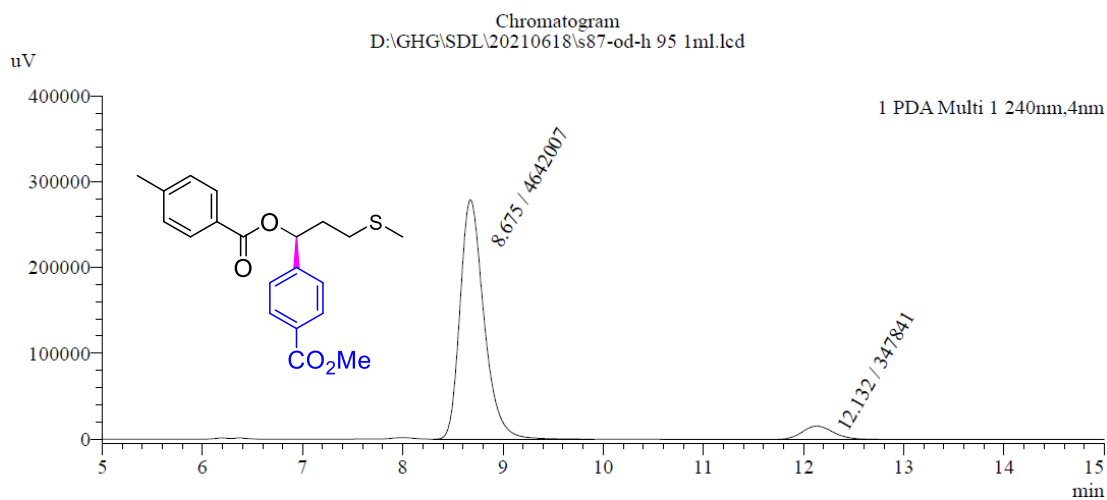

Peak Table

| Peak# | Ret. Time [min] | Width [min] | Area [uV*s] | Height [uV] | Area %  |
|-------|-----------------|-------------|-------------|-------------|---------|
| 1     | 8.675           | 0.2493      | 4642006.97  | 279404.23   | 93.0290 |
| 2     | 12.132          | 0.3370      | 347840.55   | 15701.00    | 6.9710  |



**22: racemic**

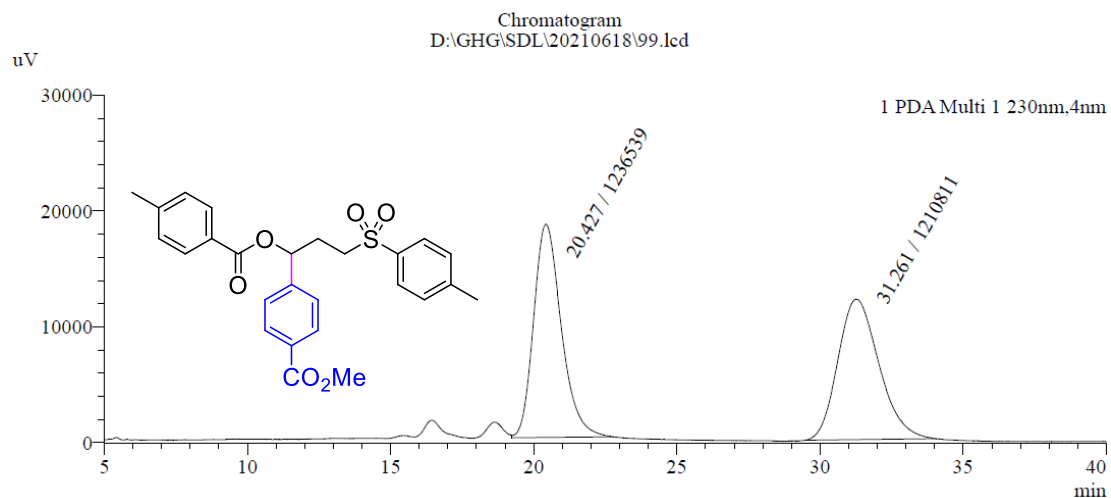

Peak Table

PDA Ch1 230nm

| Peak# | Ret. Time [min] | Width [min] | Area [uV*s] | Height [uV] | Area %  |
|-------|-----------------|-------------|-------------|-------------|---------|
| 1     | 20.427          | 1.0202      | 1236539.20  | 18386.28    | 50.5256 |
| 2     | 31.261          | 1.5407      | 1210811.17  | 12132.23    | 49.4744 |

**22: enantioenriched, 87% ee**

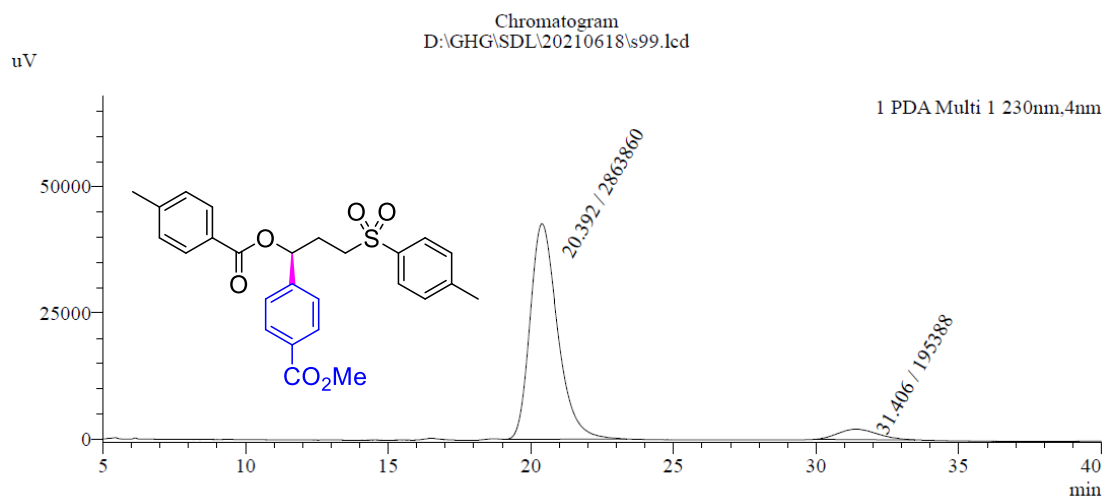

Peak Table

PDA Ch1 230nm

| Peak# | Ret. Time [min] | Width [min] | Area [uV*s] | Height [uV] | Area %  |
|-------|-----------------|-------------|-------------|-------------|---------|
| 1     | 20.392          | 1.0127      | 2863860.23  | 42684.11    | 93.6132 |
| 2     | 31.406          | 1.5275      | 195387.69   | 2038.68     | 6.3868  |

**23: racemic**

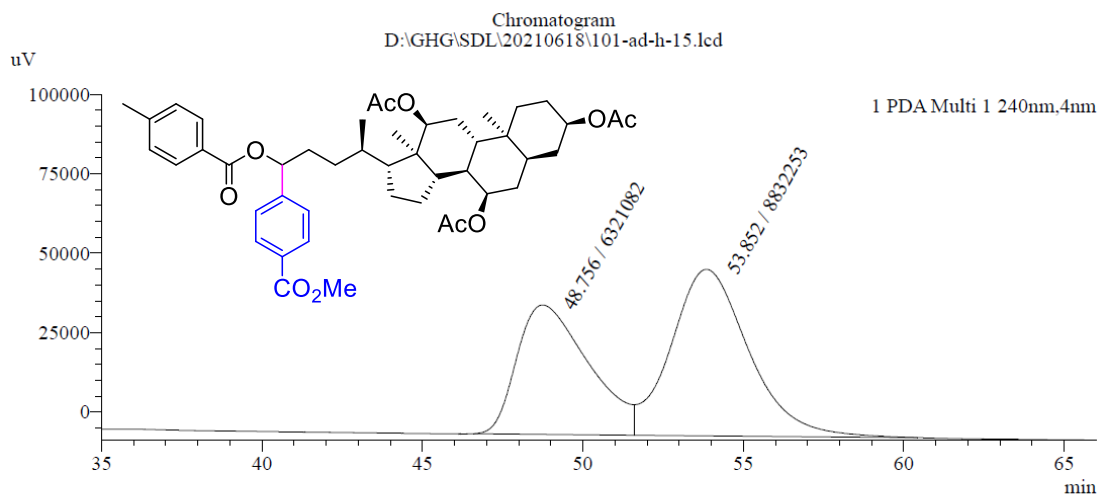

Peak Table

| Peak# | Ret. Time [min] | Width [min] | Area [uV*s] | Height [uV] | Area %  |
|-------|-----------------|-------------|-------------|-------------|---------|
| 1     | 48.756          | 2.4876      | 6321081.78  | 40708.47    | 41.7141 |
| 2     | 53.852          | 2.5224      | 8832252.77  | 52412.25    | 58.2859 |

**23: enantioenriched, 84% de**

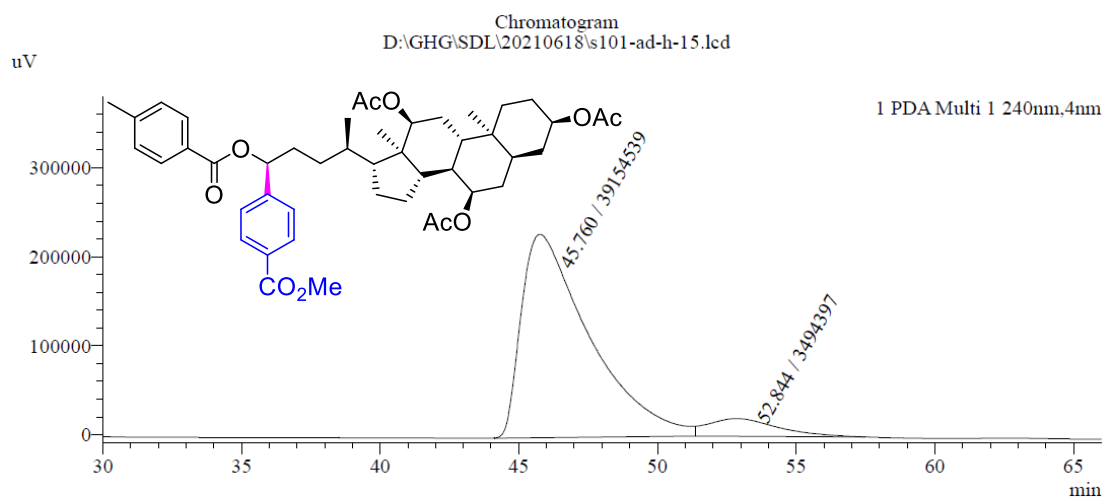

Peak Table

| Peak# | Ret. Time [min] | Width [min] | Area [uV*s] | Height [uV] | Area %  |
|-------|-----------------|-------------|-------------|-------------|---------|
| 1     | 45.760          | 2.5400      | 39154539.10 | 228420.42   | 91.8066 |
| 2     | 52.844          | --          | 3494397.15  | 19864.11    | 8.1934  |

## 24: racemic

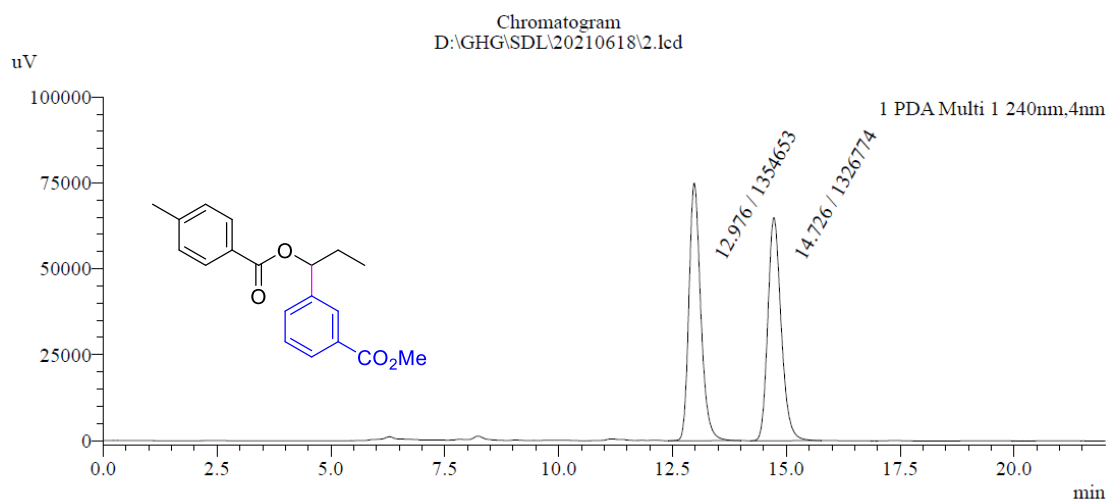

Peak Table

| Peak# | Ret. Time [min] | Width [min] | Area [uV*s] | Height [uV] | Area %  |
|-------|-----------------|-------------|-------------|-------------|---------|
| 1     | 12.976          | 0.2705      | 1354652.89  | 75056.92    | 50.5199 |
| 2     | 14.726          | 0.3087      | 1326773.99  | 64984.00    | 49.4801 |

## 24: enantioenriched, 93% ee

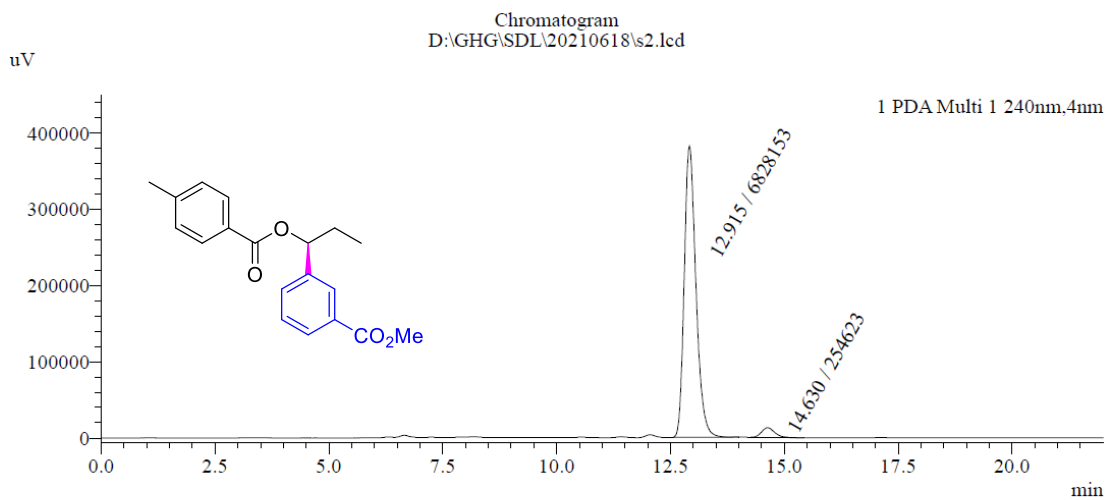

Peak Table

| Peak# | Ret. Time [min] | Width [min] | Area [uV*s] | Height [uV] | Area %  |
|-------|-----------------|-------------|-------------|-------------|---------|
| 1     | 12.915          | 0.2704      | 6828152.65  | 382316.60   | 96.4050 |
| 2     | 14.630          | 0.3067      | 254623.04   | 12713.33    | 3.5950  |

**25: racemic**

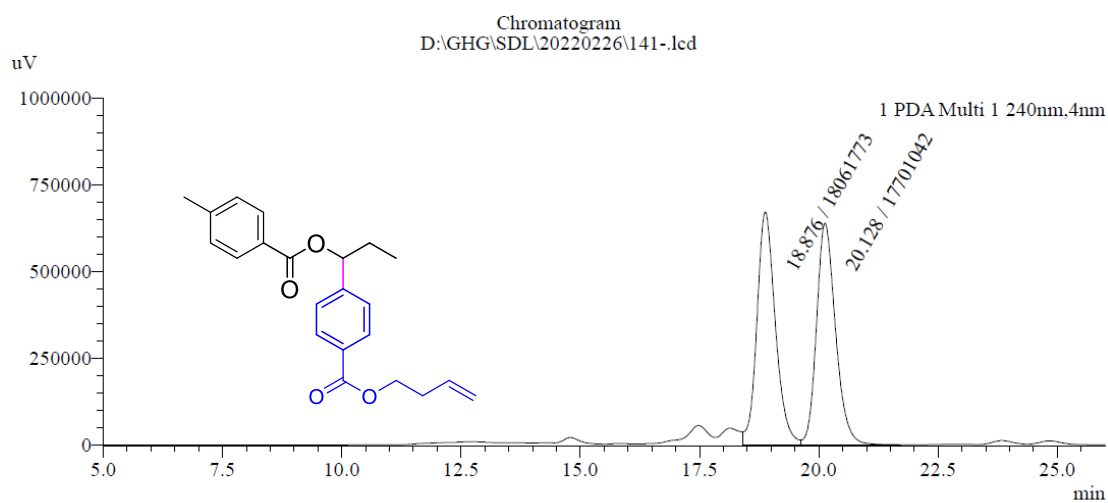

Peak Table

| PDA Ch1 240nm |                 |             |             |             |         |
|---------------|-----------------|-------------|-------------|-------------|---------|
| Peak#         | Ret. Time [min] | Width [min] | Area [uV*s] | Height [uV] | Area %  |
| 1             | 18.876          | 0.4024      | 18061772.91 | 671136.75   | 50.5043 |
| 2             | 20.128          | 0.4173      | 17701042.16 | 638963.63   | 49.4957 |

**25: enantioenriched, 92% ee**

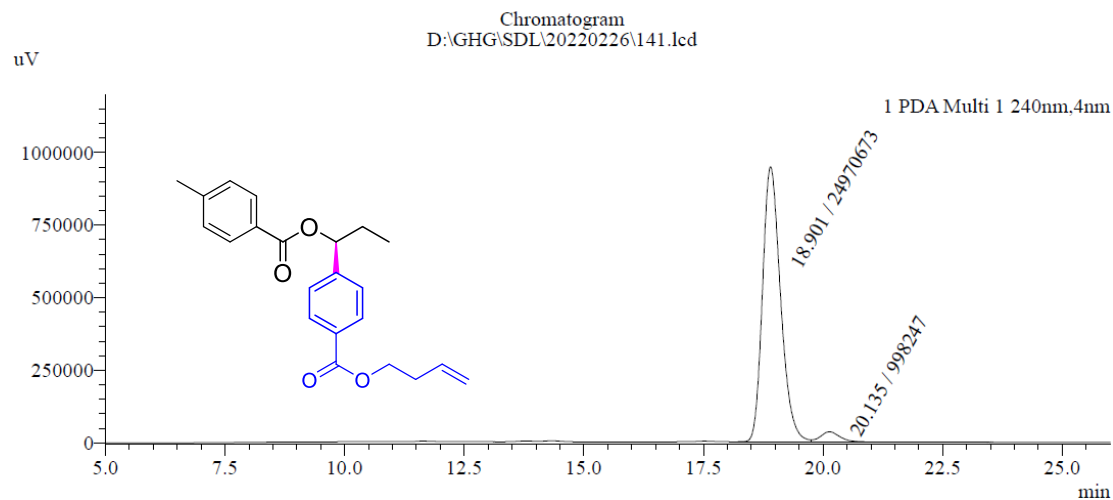

Peak Table

| PDA Ch1 240nm |                 |             |             |             |         |
|---------------|-----------------|-------------|-------------|-------------|---------|
| Peak#         | Ret. Time [min] | Width [min] | Area [uV*s] | Height [uV] | Area %  |
| 1             | 18.901          | 0.4003      | 24970673.49 | 948642.83   | 96.1560 |
| 2             | 20.135          | 0.4268      | 998246.92   | 35281.42    | 3.8440  |

**26: racemic**

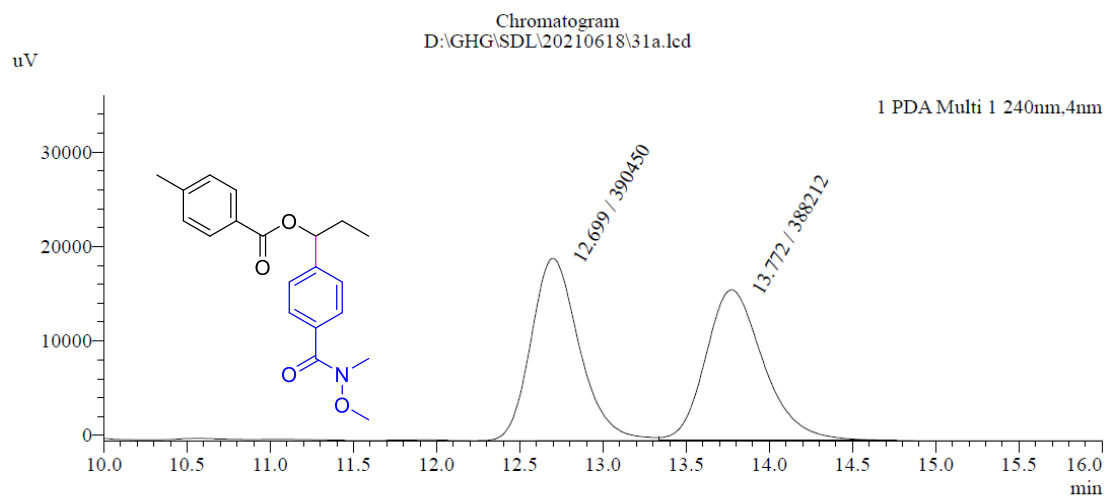

Peak Table

| Peak# | Ret. Time [min] | Width [min] | Area [uV*s] | Height [uV] | Area %  |
|-------|-----------------|-------------|-------------|-------------|---------|
| 1     | 12.699          | 0.3056      | 390450.49   | 19313.56    | 50.1437 |
| 2     | 13.772          | 0.3657      | 388212.00   | 15985.18    | 49.8563 |

**26: enantioenriched, 92% ee**

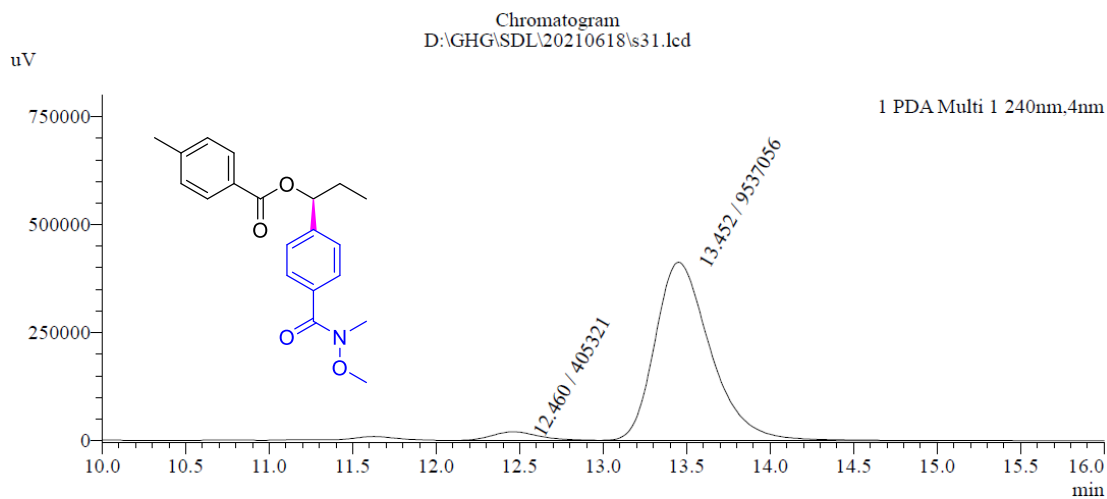

Peak Table

| Peak# | Ret. Time [min] | Width [min] | Area [uV*s] | Height [uV] | Area %  |
|-------|-----------------|-------------|-------------|-------------|---------|
| 1     | 12.460          | 0.2965      | 405320.88   | 20372.98    | 4.0767  |
| 2     | 13.452          | 0.3469      | 9537055.52  | 412592.75   | 95.9233 |

27: racemic

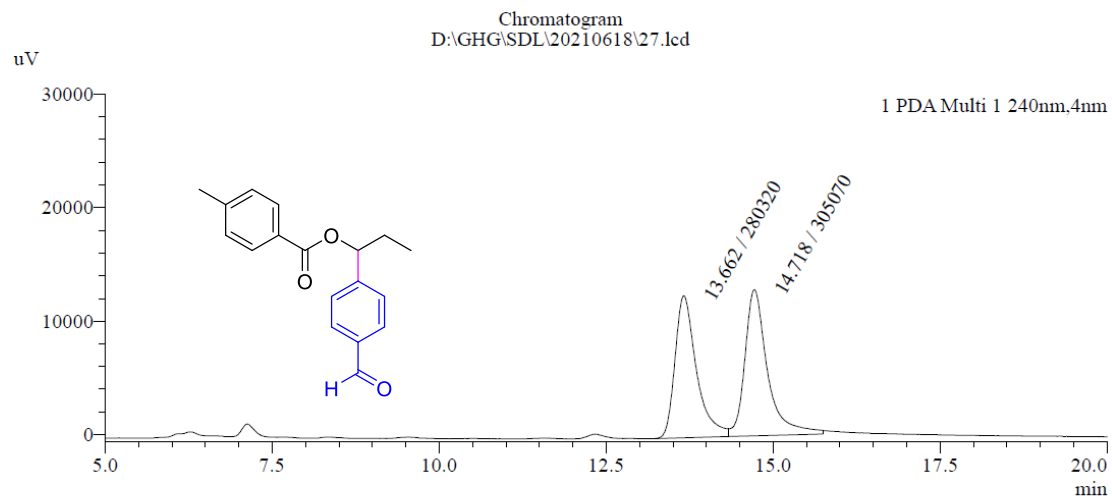

Peak Table

| Peak# | Ret. Time [min] | Width [min] | Area [uV*s] | Height [uV] | Area %  |
|-------|-----------------|-------------|-------------|-------------|---------|
| 1     | 13.662          | 0.3231      | 280320.49   | 12503.64    | 47.8861 |
| 2     | 14.718          | 0.3237      | 305069.89   | 12885.37    | 52.1139 |

27: enantioenriched, 94% ee

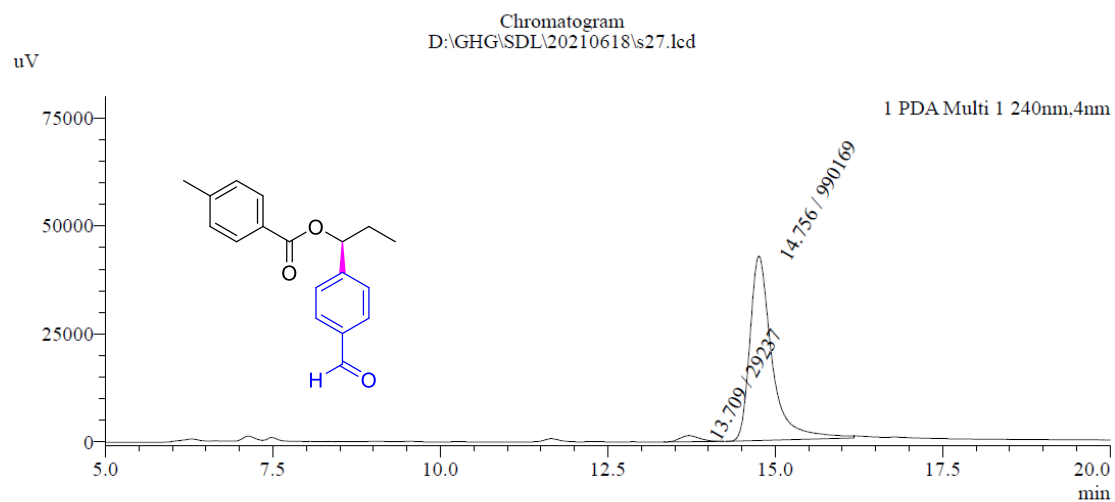

Peak Table

| Peak# | Ret. Time [min] | Width [min] | Area [uV*s] | Height [uV] | Area %  |
|-------|-----------------|-------------|-------------|-------------|---------|
| 1     | 13.709          | 0.3192      | 29236.81    | 1414.40     | 2.8680  |
| 2     | 14.756          | 0.3189      | 990168.91   | 42709.72    | 97.1320 |

**28: racemic**

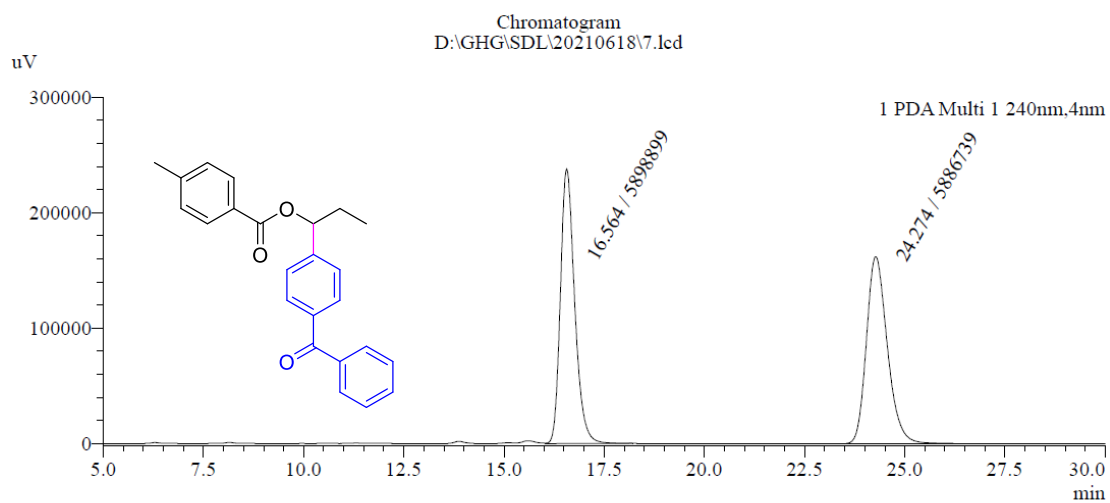

Peak Table

| PDA Ch1 240nm |                 |             |             |             |         |
|---------------|-----------------|-------------|-------------|-------------|---------|
| Peak#         | Ret. Time [min] | Width [min] | Area [uV*s] | Height [uV] | Area %  |
| 1             | 16.564          | 0.3741      | 5898898.59  | 237883.62   | 50.0516 |
| 2             | 24.274          | 0.5508      | 5886738.92  | 162137.38   | 49.9484 |

**28: enantioenriched, 94% ee**

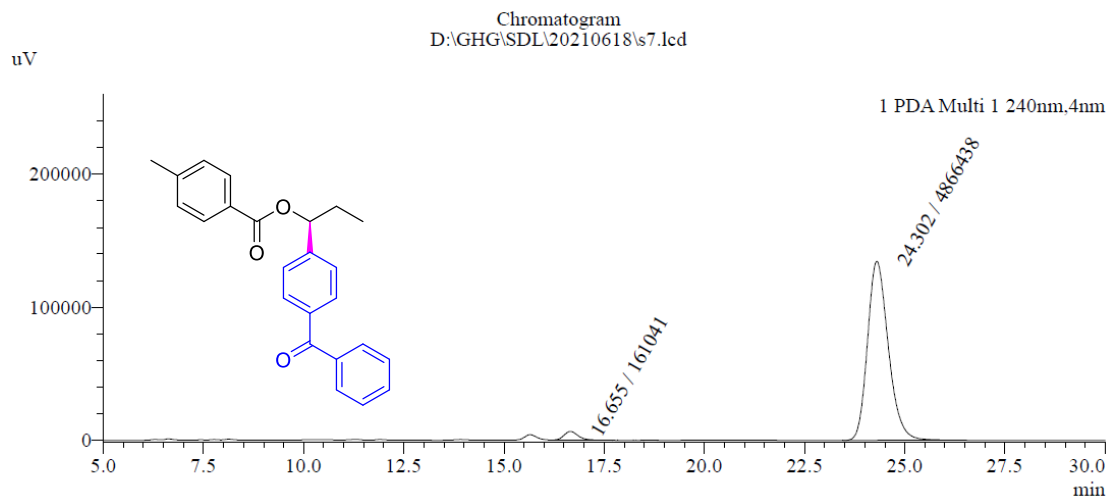

Peak Table

| PDA Ch1 240nm |                 |             |             |             |         |
|---------------|-----------------|-------------|-------------|-------------|---------|
| Peak#         | Ret. Time [min] | Width [min] | Area [uV*s] | Height [uV] | Area %  |
| 1             | 16.655          | 0.3727      | 161041.18   | 6560.56     | 3.2032  |
| 2             | 24.302          | 0.5495      | 4866438.32  | 134462.57   | 96.7968 |

**29: racemic**

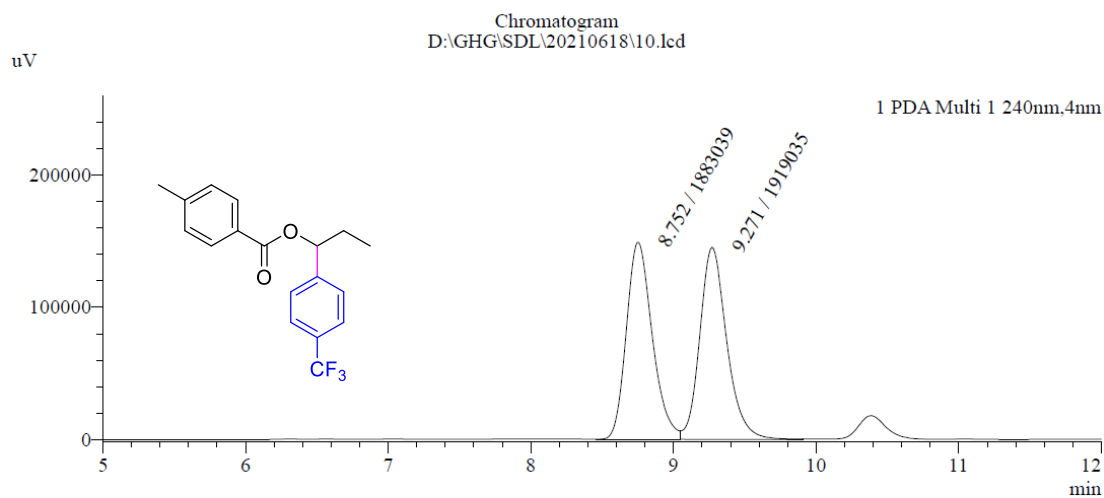

Peak Table

PDA Ch1 240nm

| Peak# | Ret. Time [min] | Width [min] | Area [uV*s] | Height [uV] | Area %  |
|-------|-----------------|-------------|-------------|-------------|---------|
| 1     | 8.752           | 0.1921      | 1883039.46  | 149119.65   | 49.5266 |
| 2     | 9.271           | 0.1978      | 1919034.88  | 145294.12   | 50.4734 |

**29: enantioenriched, 87% ee**

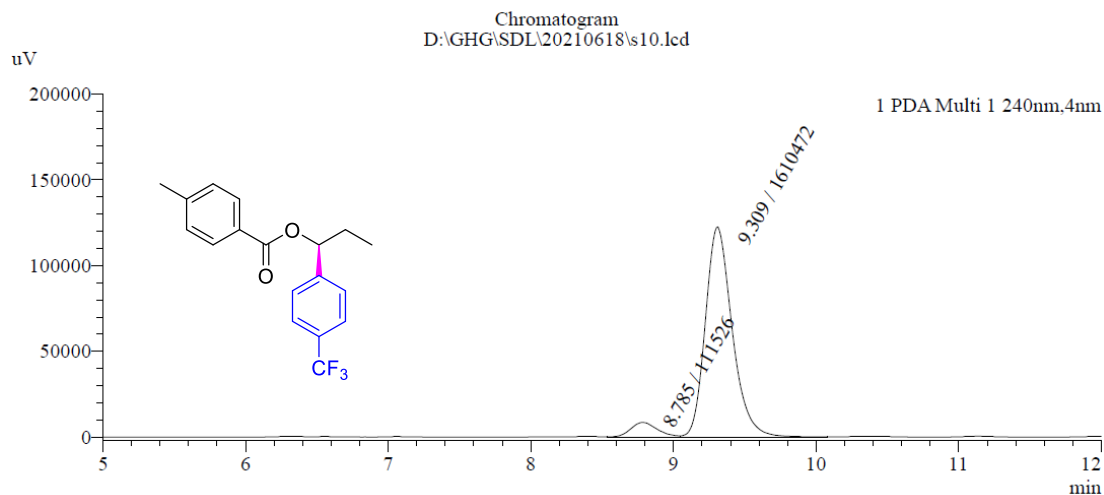

Peak Table

PDA Ch1 240nm

| Peak# | Ret. Time [min] | Width [min] | Area [uV*s] | Height [uV] | Area %  |
|-------|-----------------|-------------|-------------|-------------|---------|
| 1     | 8.785           | 0.1976      | 111525.99   | 8590.24     | 6.4765  |
| 2     | 9.309           | 0.1978      | 1610472.26  | 122337.16   | 93.5235 |



**30: racemic**

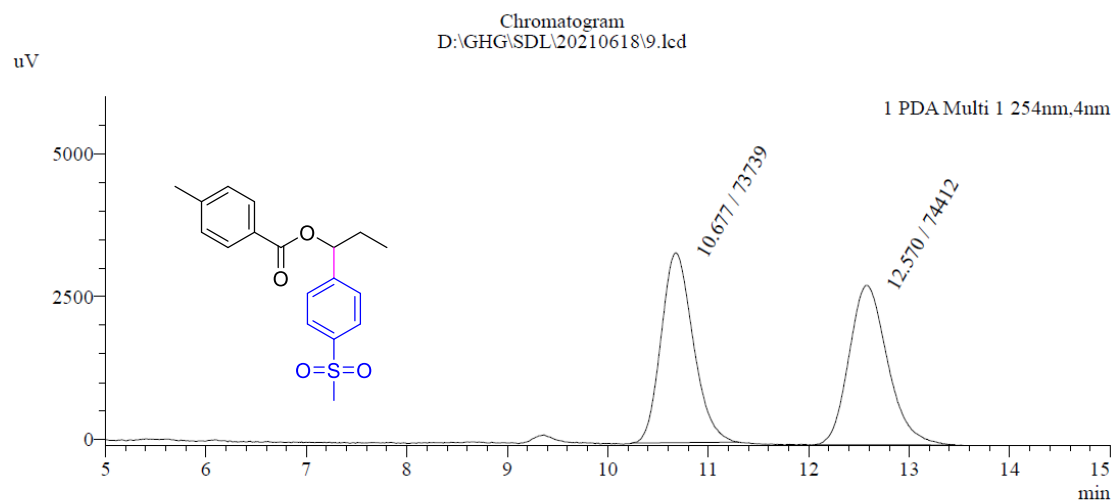

Peak Table

PDA Ch1 254nm

| Peak# | Ret. Time [min] | Width [min] | Area [uV*s] | Height [uV] | Area %  |
|-------|-----------------|-------------|-------------|-------------|---------|
| 1     | 10.677          | 0.3420      | 73739.27    | 3324.15     | 49.7729 |
| 2     | 12.570          | 0.4075      | 74412.26    | 2784.74     | 50.2271 |

**30: enantioenriched, 94% ee**

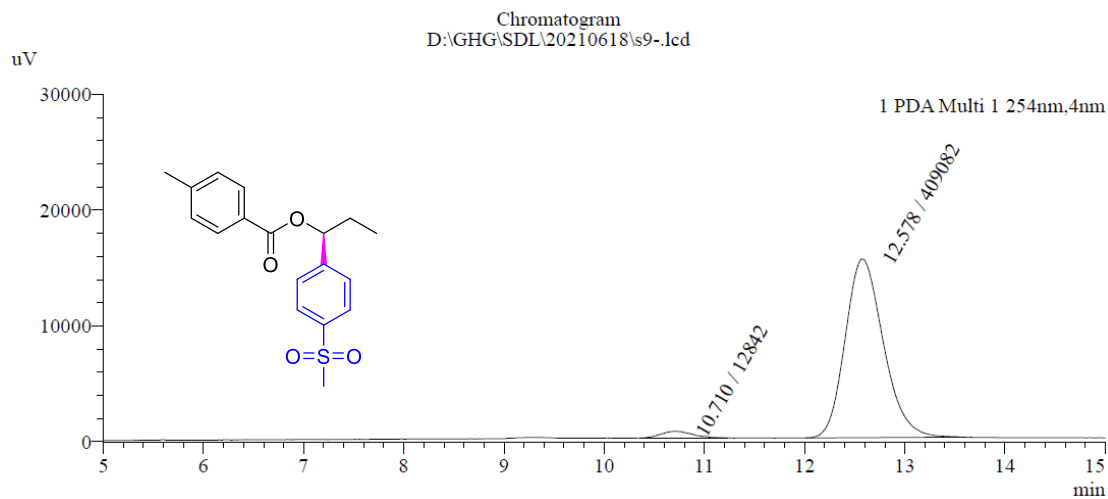

Peak Table

PDA Ch1 254nm

| Peak# | Ret. Time [min] | Width [min] | Area [uV*s] | Height [uV] | Area %  |
|-------|-----------------|-------------|-------------|-------------|---------|
| 1     | 10.710          | 0.3356      | 12841.96    | 591.86      | 3.0437  |
| 2     | 12.578          | 0.4057      | 409082.25   | 15433.72    | 96.9563 |

**31: racemic**

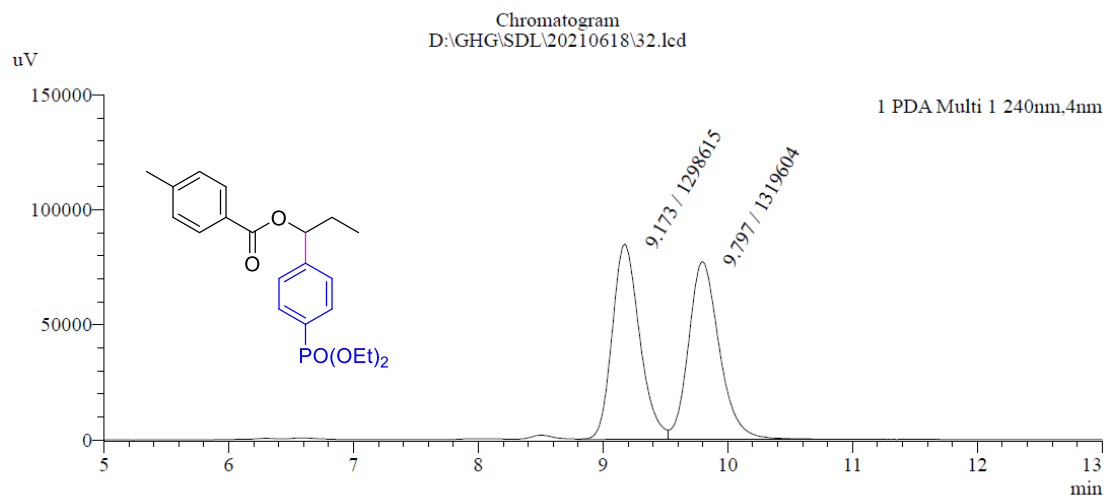

Peak Table

| Peak# | Ret. Time [min] | Width [min] | Area [uV*s] | Height [uV] | Area %  |
|-------|-----------------|-------------|-------------|-------------|---------|
| 1     | 9.173           | 0.2333      | 1298614.85  | 84832.56    | 49.5992 |
| 2     | 9.797           | 0.2573      | 1319604.47  | 77213.11    | 50.4008 |

**31: enantioenriched, 89% ee**

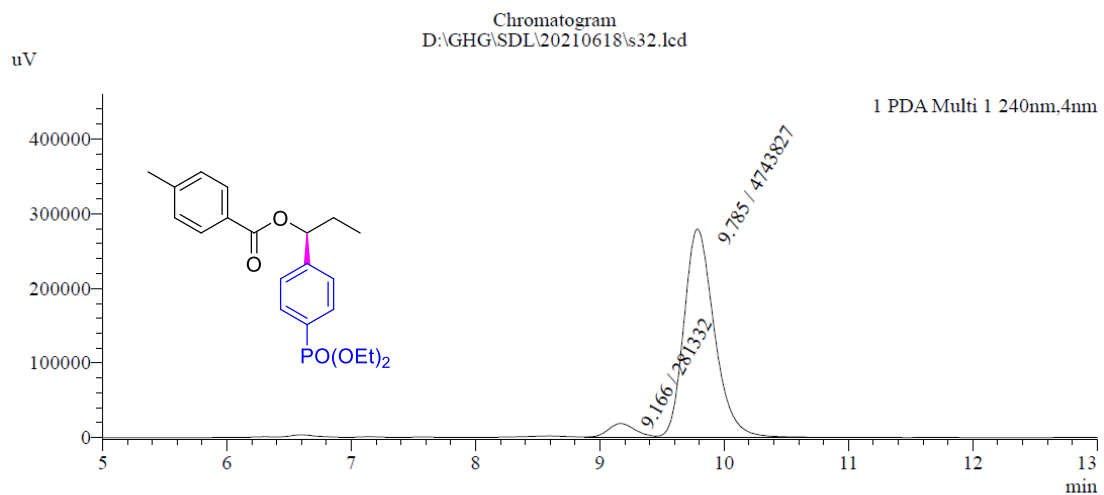

Peak Table

| Peak# | Ret. Time [min] | Width [min] | Area [uV*s] | Height [uV] | Area %  |
|-------|-----------------|-------------|-------------|-------------|---------|
| 1     | 9.166           | 0.2344      | 281331.64   | 18470.79    | 5.5985  |
| 2     | 9.785           | 0.2566      | 4743826.79  | 279236.18   | 94.4015 |

**32: racemic**

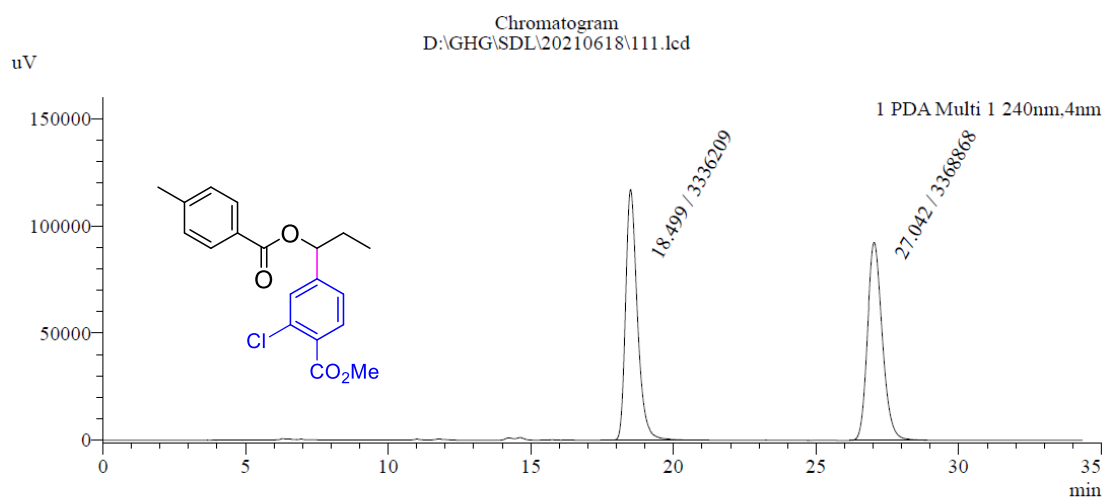

Peak Table

| Peak# | Ret. Time [min] | Width [min] | Area [uV*s] | Height [uV] | Area %  |
|-------|-----------------|-------------|-------------|-------------|---------|
| 1     | 18.499          | 0.4246      | 3336209.24  | 116896.57   | 49.7565 |
| 2     | 27.042          | 0.5538      | 3368867.91  | 92409.74    | 50.2435 |

**32: enantioenriched, 94% ee**

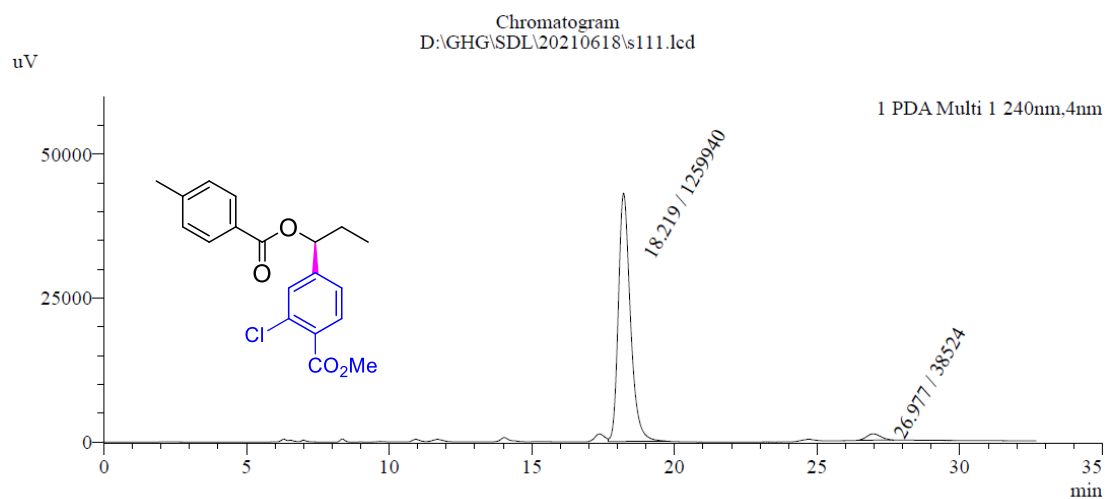

Peak Table

| Peak# | Ret. Time [min] | Width [min] | Area [uV*s] | Height [uV] | Area %  |
|-------|-----------------|-------------|-------------|-------------|---------|
| 1     | 18.219          | 0.4346      | 1259939.78  | 43155.26    | 97.0331 |
| 2     | 26.977          | 0.5480      | 38524.40    | 1114.29     | 2.9669  |

**33: racemic**

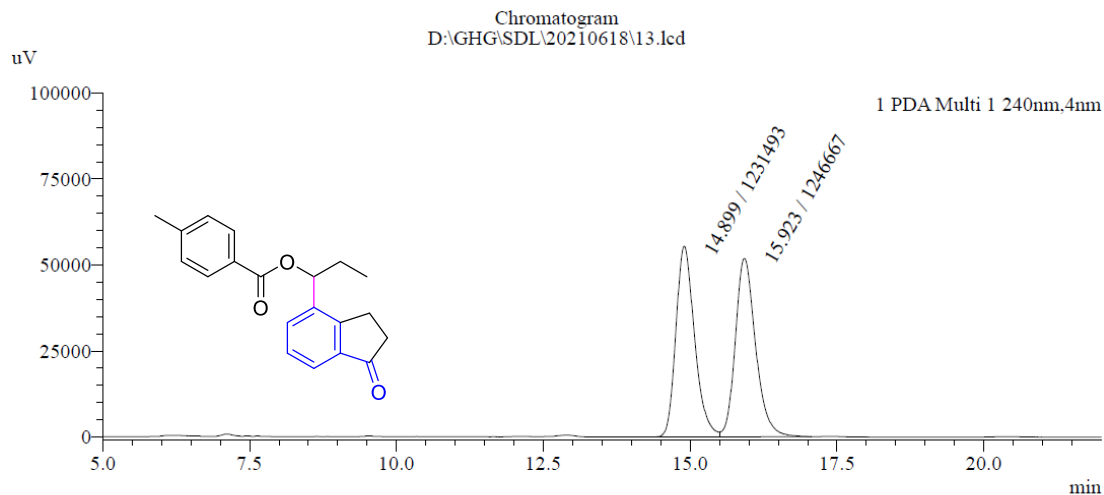

Peak Table

| Peak# | Ret. Time [min] | Width [min] | Area [uV*s] | Height [uV] | Area %  |
|-------|-----------------|-------------|-------------|-------------|---------|
| 1     | 14.899          | 0.3358      | 1231492.68  | 55470.77    | 49.6938 |
| 2     | 15.923          | 0.3602      | 1246667.27  | 51855.65    | 50.3062 |

**33: enantioenriched, 93% ee**

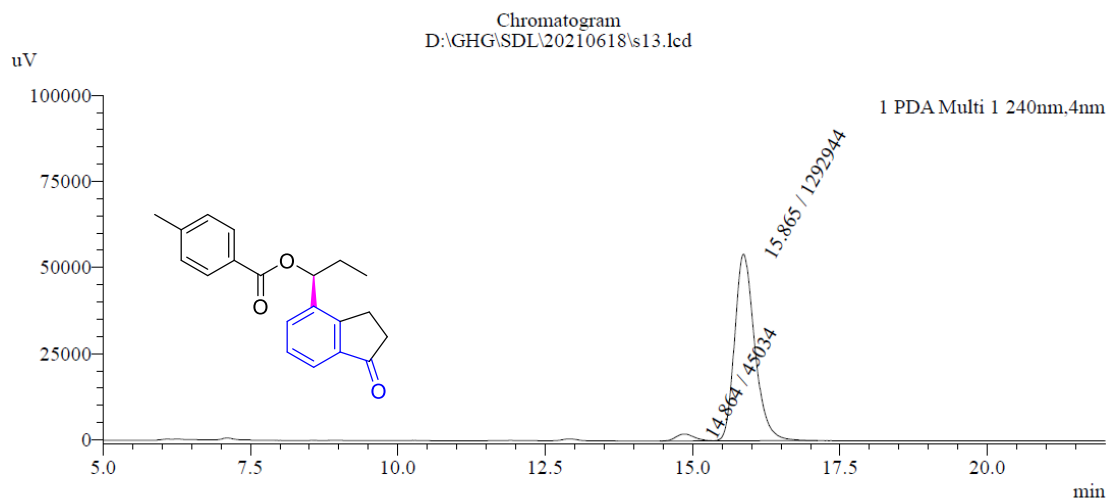

Peak Table

| Peak# | Ret. Time [min] | Width [min] | Area [uV*s] | Height [uV] | Area %  |
|-------|-----------------|-------------|-------------|-------------|---------|
| 1     | 14.864          | 0.3375      | 45033.85    | 2059.72     | 3.3658  |
| 2     | 15.865          | 0.3582      | 1292944.02  | 54240.34    | 96.6342 |

**34: racemic**

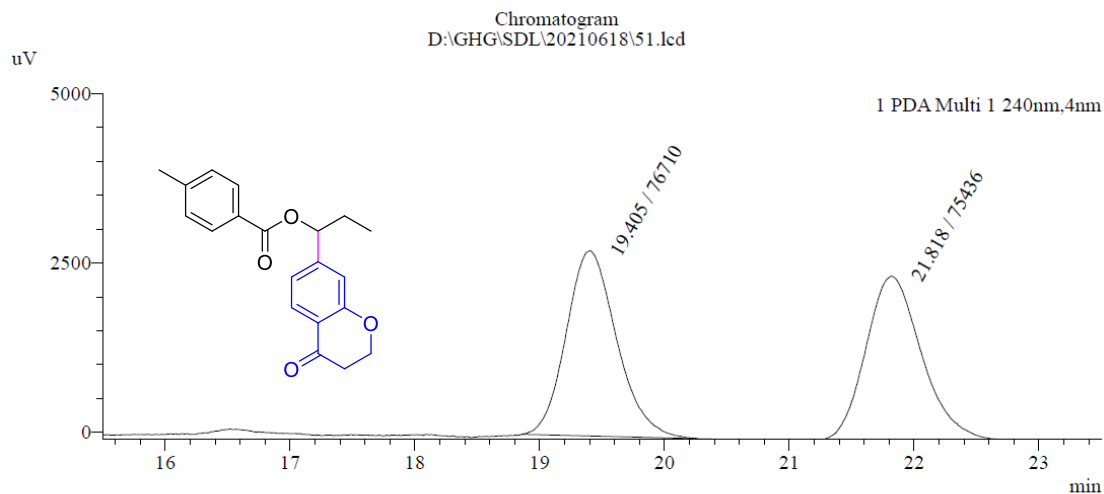

Peak Table

| Peak# | Ret. Time [min] | Width [min] | Area [uV*s] | Height [uV] | Area %  |
|-------|-----------------|-------------|-------------|-------------|---------|
| 1     | 19.405          | 0.4282      | 76710.11    | 2735.19     | 50.4186 |
| 2     | 21.818          | 0.4756      | 75436.33    | 2424.03     | 49.5814 |

**34: enantioenriched, 94% ee**

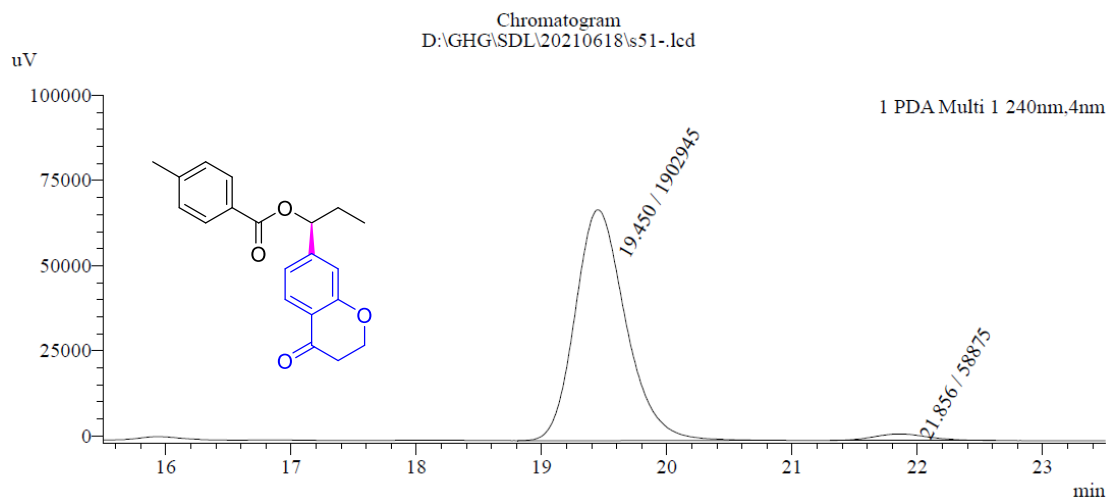

Peak Table

| Peak# | Ret. Time [min] | Width [min] | Area [uV*s] | Height [uV] | Area %  |
|-------|-----------------|-------------|-------------|-------------|---------|
| 1     | 19.450          | 0.4252      | 1902945.15  | 67735.57    | 96.9989 |
| 2     | 21.856          | 0.4713      | 58875.32    | 1932.33     | 3.0011  |

**35: racemic**

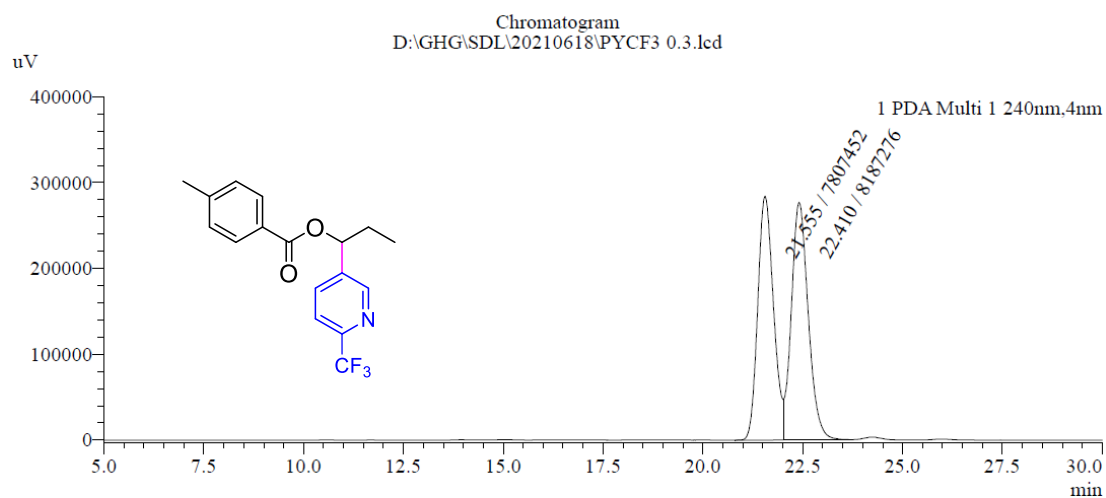

Peak Table

| Peak# | Ret. Time [min] | Width [min] | Area [uV*s] | Height [uV] | Area %  |
|-------|-----------------|-------------|-------------|-------------|---------|
| 1     | 21.555          | 0.4285      | 7807451.63  | 284209.64   | 48.8127 |
| 2     | 22.410          | 0.4490      | 8187275.79  | 276939.16   | 51.1873 |

**35: enantioenriched, 94% ee**

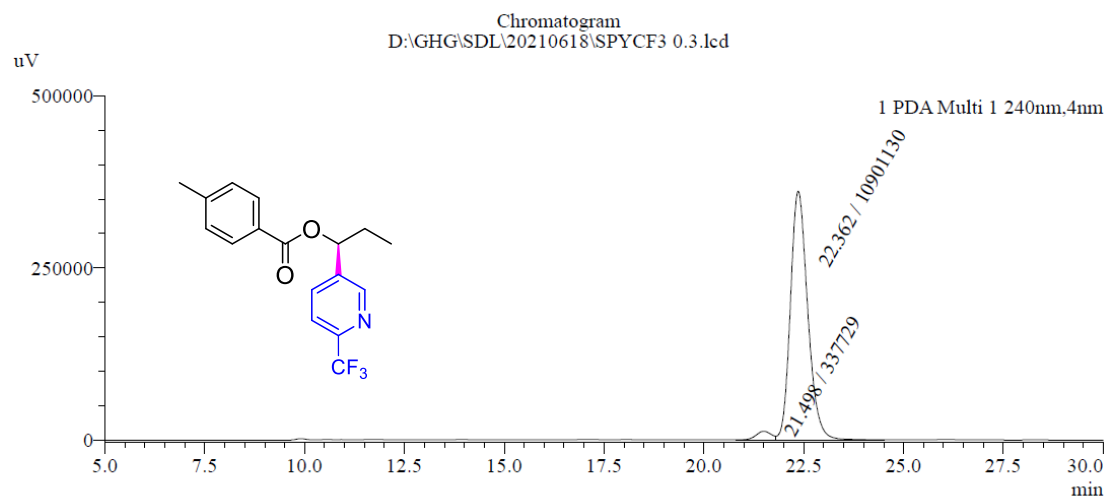

Peak Table

| Peak# | Ret. Time [min] | Width [min] | Area [uV*s] | Height [uV] | Area %  |
|-------|-----------------|-------------|-------------|-------------|---------|
| 1     | 21.498          | 0.4537      | 337728.81   | 12568.82    | 3.0050  |
| 2     | 22.362          | 0.4576      | 10901129.68 | 361162.89   | 96.9950 |

**36: racemic**

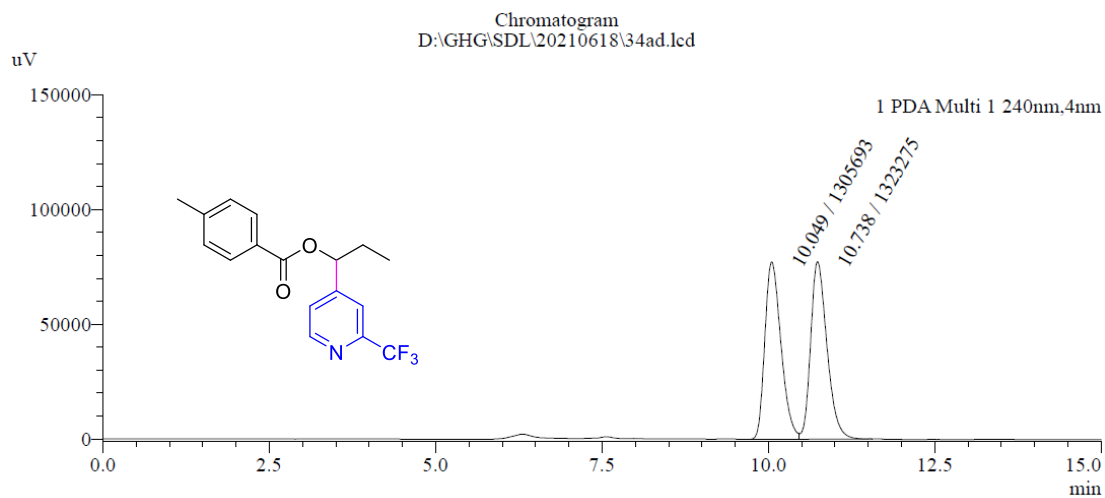

Peak Table

| Peak# | Ret. Time [min] | Width [min] | Area [uV*s] | Height [uV] | Area %  |
|-------|-----------------|-------------|-------------|-------------|---------|
| 1     | 10.049          | 0.2618      | 1305693.07  | 77289.95    | 49.6656 |
| 2     | 10.738          | 0.2599      | 1323275.47  | 77343.25    | 50.3344 |

**36: enantioenriched, 93% ee**

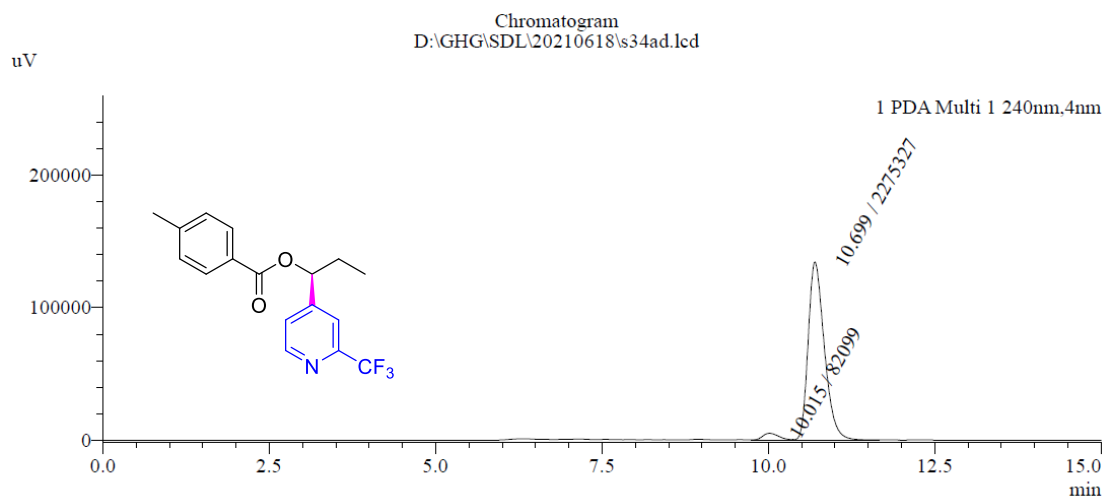

Peak Table

| Peak# | Ret. Time [min] | Width [min] | Area [uV*s] | Height [uV] | Area %  |
|-------|-----------------|-------------|-------------|-------------|---------|
| 1     | 10.015          | 0.2575      | 82098.97    | 5040.92     | 3.4826  |
| 2     | 10.699          | 0.2579      | 2275326.90  | 134389.58   | 96.5174 |

**37: racemic**

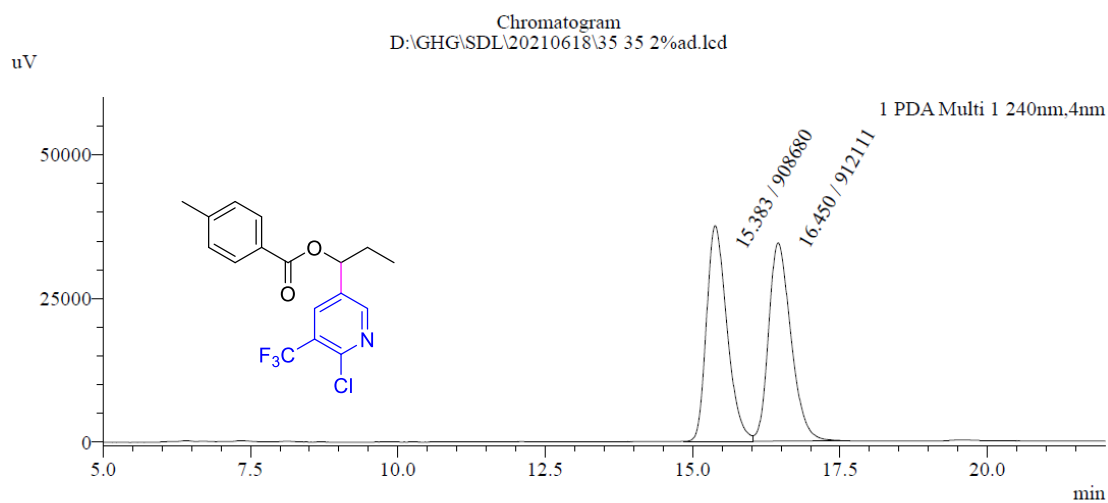

Peak Table

PDA Ch1 240nm

| Peak# | Ret. Time [min] | Width [min] | Area [uV*s] | Height [uV] | Area %  |
|-------|-----------------|-------------|-------------|-------------|---------|
| 1     | 15.383          | 0.3711      | 908679.59   | 37518.30    | 49.9058 |
| 2     | 16.450          | 0.4038      | 912111.14   | 34484.11    | 50.0942 |

**37: enantioenriched, 93% ee**

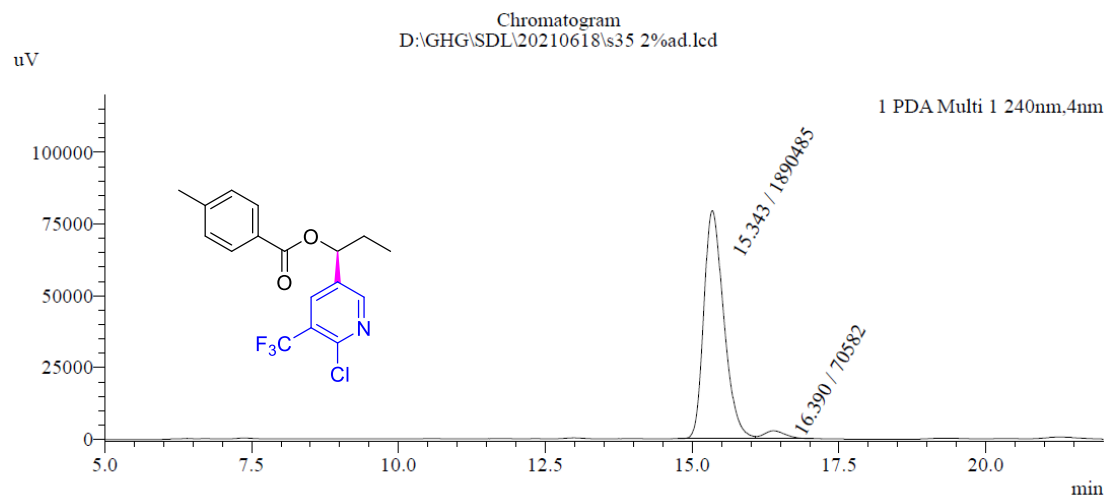

Peak Table

PDA Ch1 240nm

| Peak# | Ret. Time [min] | Width [min] | Area [uV*s] | Height [uV] | Area %  |
|-------|-----------------|-------------|-------------|-------------|---------|
| 1     | 15.343          | 0.3637      | 1890484.94  | 79416.42    | 96.4008 |
| 2     | 16.390          | 0.4018      | 70582.47    | 2757.15     | 3.5992  |



**38: racemic**

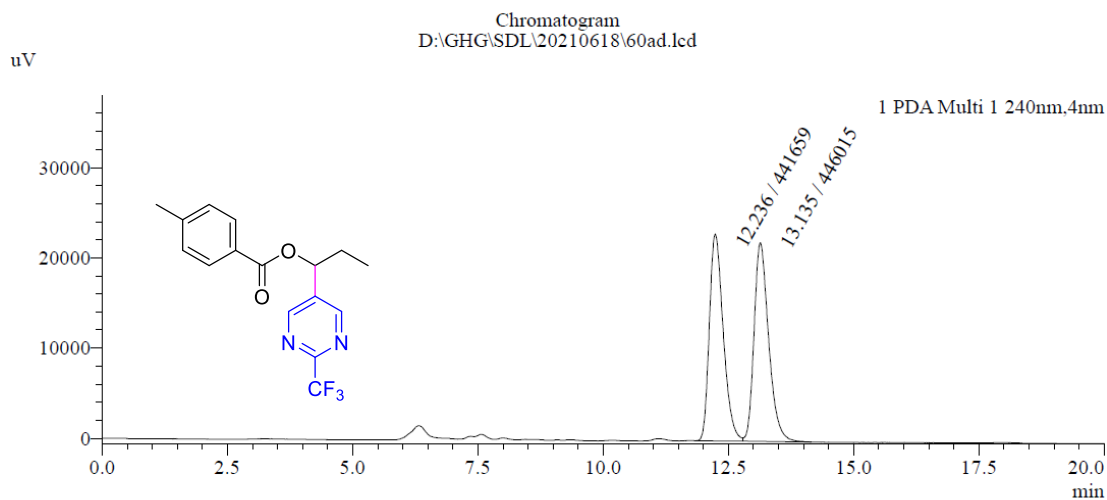

Peak Table

| Peak# | Ret. Time [min] | Width [min] | Area [uV*s] | Height [uV] | Area %  |
|-------|-----------------|-------------|-------------|-------------|---------|
| 1     | 12.236          | 0.2954      | 441658.81   | 22923.05    | 49.7546 |
| 2     | 13.135          | 0.3052      | 446015.14   | 22002.25    | 50.2454 |

**38: enantioenriched, 91% ee**

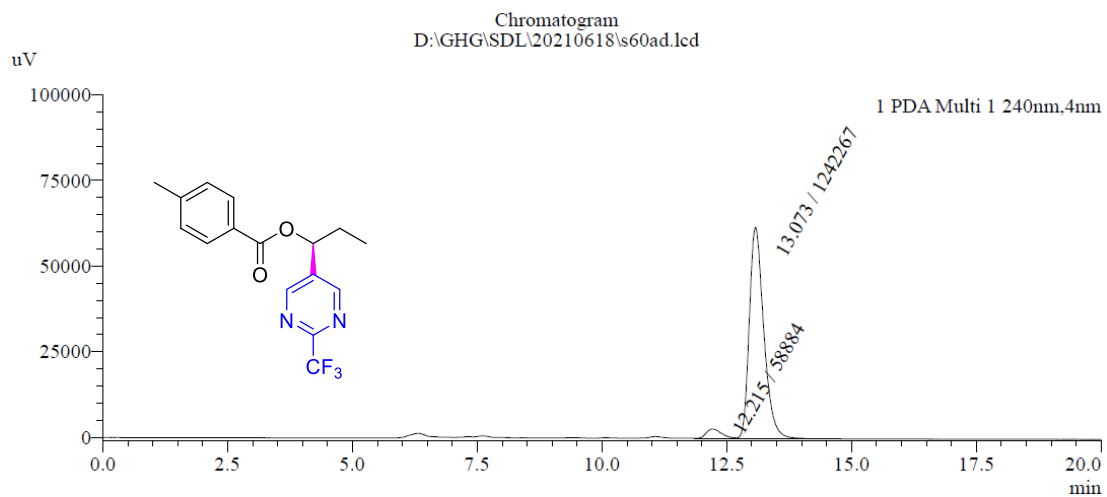

Peak Table

| Peak# | Ret. Time [min] | Width [min] | Area [uV*s] | Height [uV] | Area %  |
|-------|-----------------|-------------|-------------|-------------|---------|
| 1     | 12.215          | 0.3354      | 58884.23    | 2748.51     | 4.5255  |
| 2     | 13.073          | 0.3042      | 124266.87   | 61581.18    | 95.4745 |

**39: racemic**

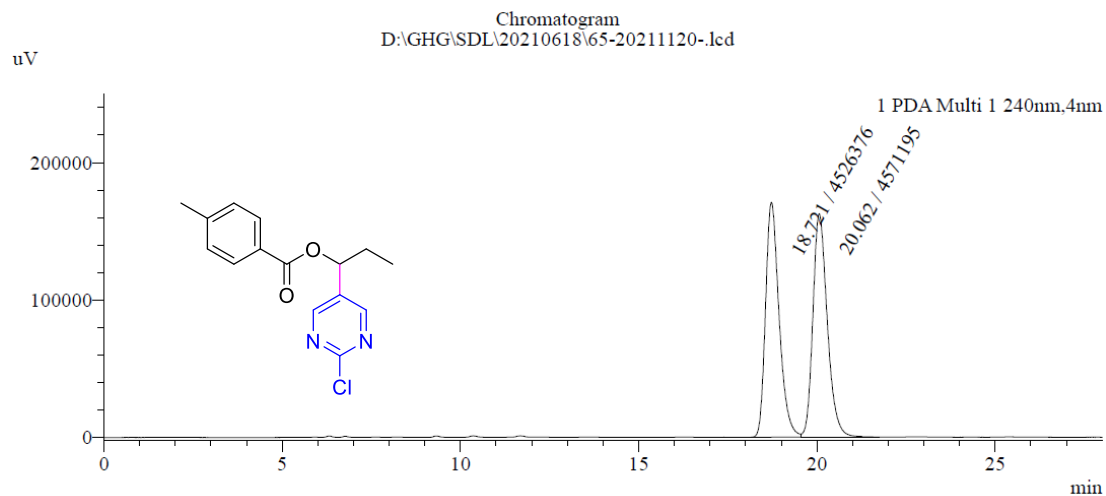

Peak Table

| Peak# | Ret. Time [min] | Width [min] | Area [uV*s] | Height [uV] | Area %  |
|-------|-----------------|-------------|-------------|-------------|---------|
| 1     | 18.721          | 0.3999      | 4526376.36  | 170919.69   | 49.7537 |
| 2     | 20.062          | 0.4238      | 4571195.02  | 162534.44   | 50.2463 |

**39: enantioenriched, 91% ee**

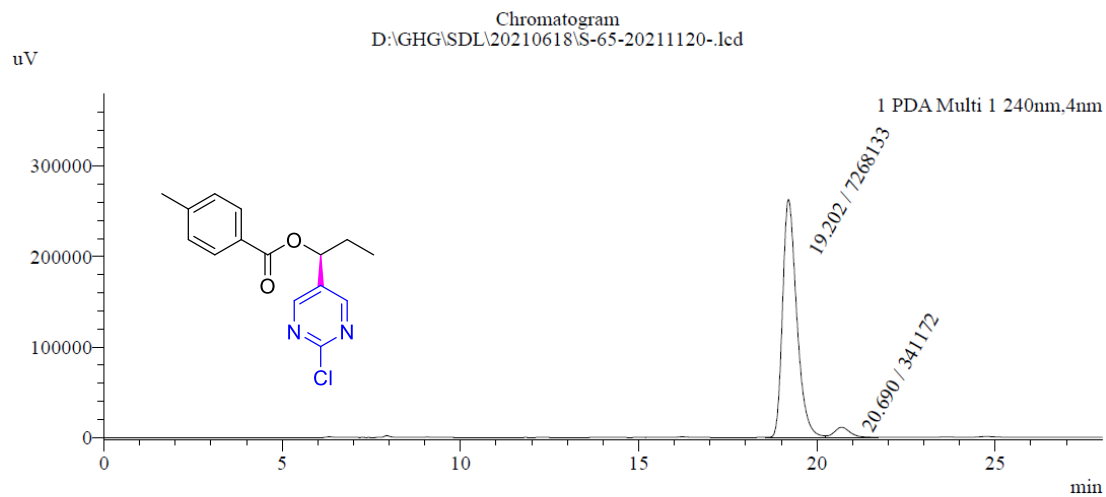

Peak Table

| Peak# | Ret. Time [min] | Width [min] | Area [uV*s] | Height [uV] | Area %  |
|-------|-----------------|-------------|-------------|-------------|---------|
| 1     | 19.202          | 0.4163      | 7268132.91  | 262910.49   | 95.5164 |
| 2     | 20.690          | 0.4553      | 341172.17   | 11224.16    | 4.4836  |

**40: racemic**

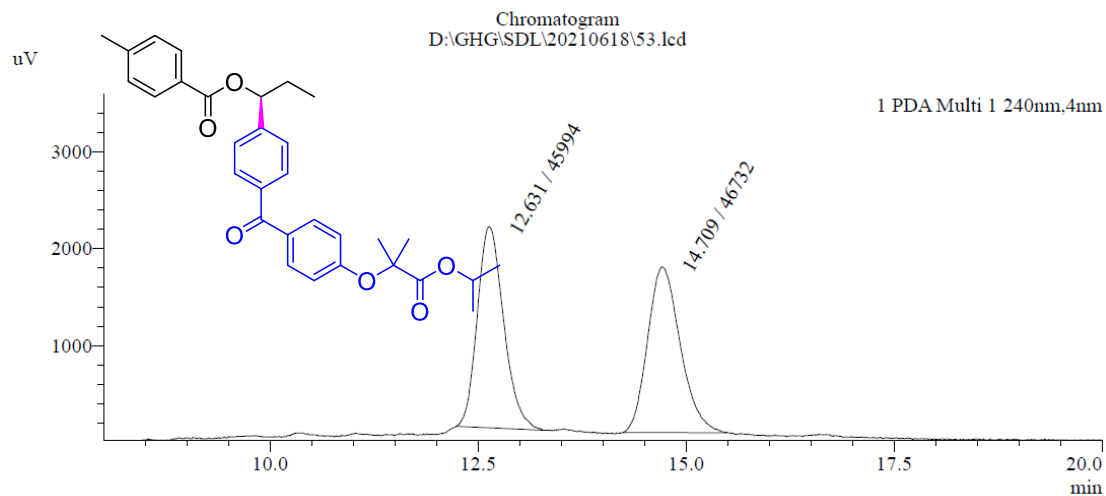

Peak Table

| Peak# | Ret. Time [min] | Width [min] | Area [uV*s] | Height [uV] | Area %  |
|-------|-----------------|-------------|-------------|-------------|---------|
| 1     | 12.631          | 0.3394      | 45993.77    | 2081.31     | 49.6021 |
| 2     | 14.709          | 0.4195      | 46731.60    | 1711.54     | 50.3979 |

**40: enantioenriched, 92% ee**

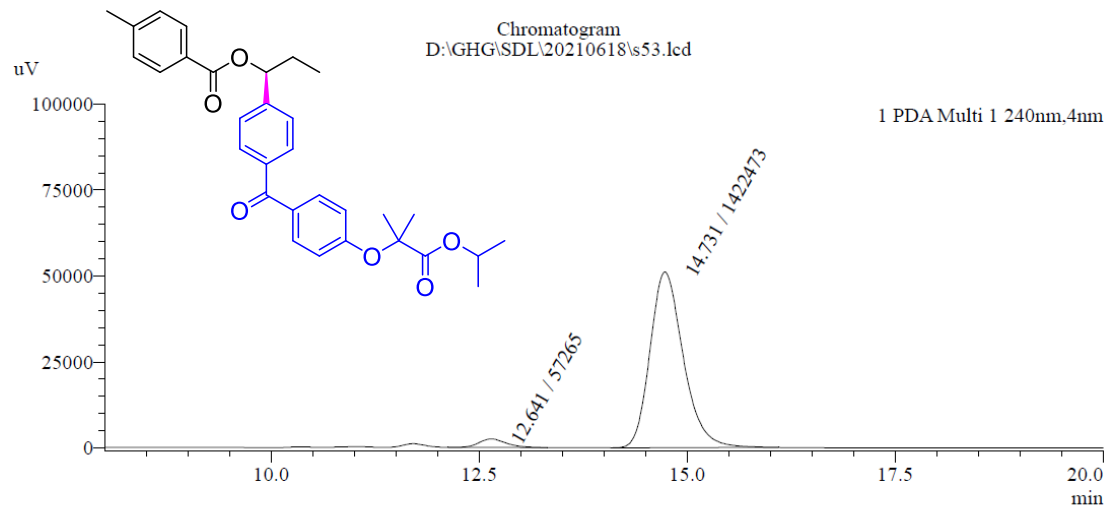

Peak Table

| Peak# | Ret. Time [min] | Width [min] | Area [uV*s] | Height [uV] | Area %  |
|-------|-----------------|-------------|-------------|-------------|---------|
| 1     | 12.641          | 0.3477      | 57265.21    | 2480.28     | 3.8700  |
| 2     | 14.731          | 0.4203      | 1422472.85  | 51075.86    | 96.1300 |

**41: racemic**

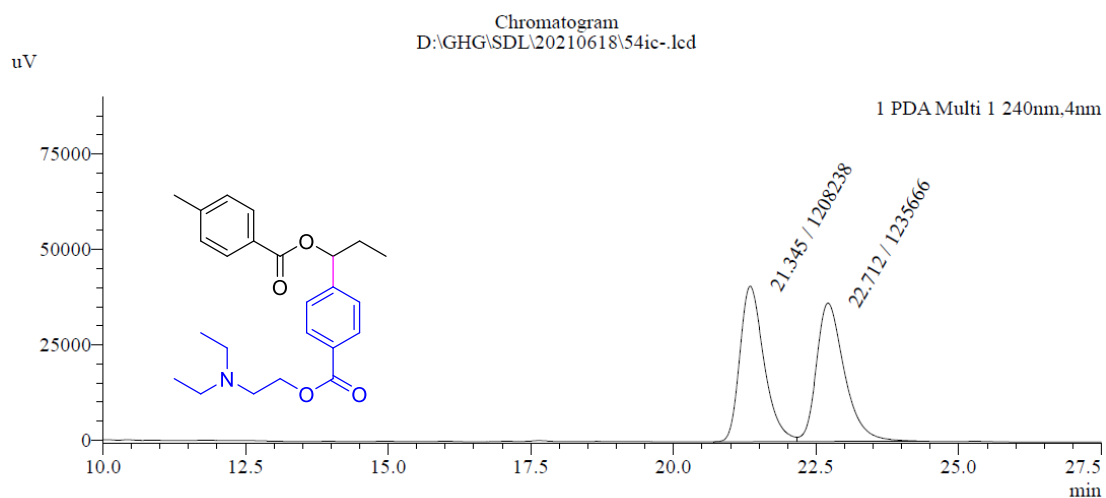

Peak Table

PDA Ch1 240nm

| Peak# | Ret. Time [min] | Width [min] | Area [uV*s] | Height [uV] | Area %  |
|-------|-----------------|-------------|-------------|-------------|---------|
| 1     | 21.345          | 0.4491      | 1208238.11  | 40747.27    | 49.4389 |
| 2     | 22.712          | 0.5072      | 1235665.65  | 36274.00    | 50.5611 |

**41: enantioenriched, 92% ee**

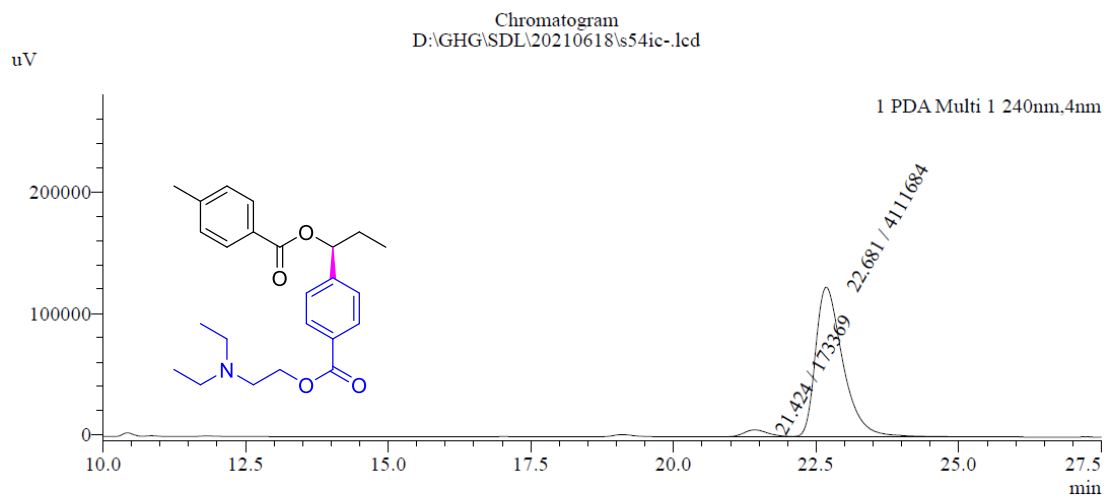

Peak Table

PDA Ch1 240nm

| Peak# | Ret. Time [min] | Width [min] | Area [uV*s] | Height [uV] | Area %  |
|-------|-----------------|-------------|-------------|-------------|---------|
| 1     | 21.424          | 0.4605      | 173369.30   | 5772.07     | 4.0459  |
| 2     | 22.681          | 0.4971      | 4111683.82  | 123057.67   | 95.9541 |

**42: racemic**

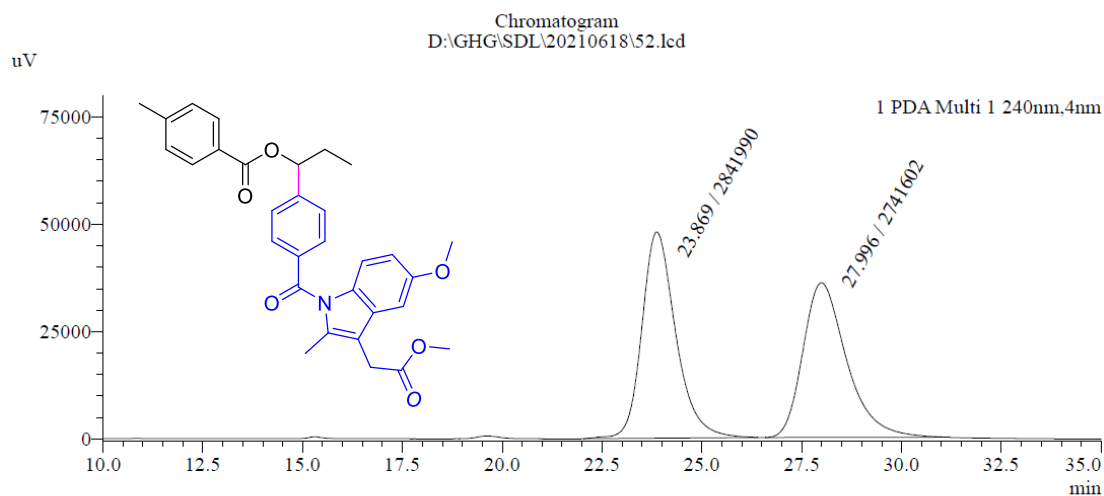

Peak Table

PDA Ch1 240nm

| Peak# | Ret. Time [min] | Width [min] | Area [uV*s] | Height [uV] | Area %  |
|-------|-----------------|-------------|-------------|-------------|---------|
| 1     | 23.869          | 0.8748      | 2841990.28  | 48061.79    | 50.8990 |
| 2     | 27.996          | 1.1379      | 2741601.86  | 36030.68    | 49.1010 |

**42: enantioenriched, 93% ee**

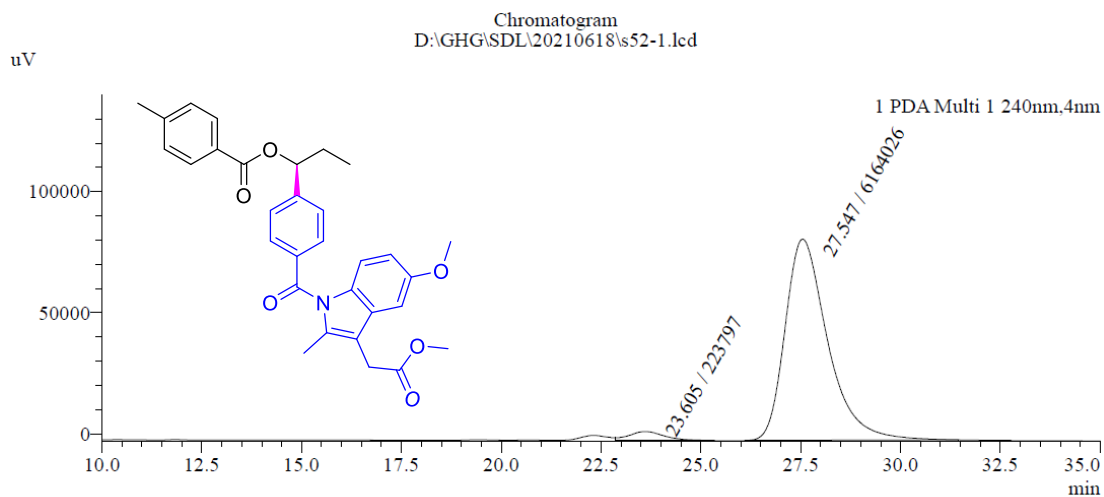

Peak Table

PDA Ch1 240nm

| Peak# | Ret. Time [min] | Width [min] | Area [uV*s] | Height [uV] | Area %  |
|-------|-----------------|-------------|-------------|-------------|---------|
| 1     | 23.605          | 0.9269      | 223797.39   | 3702.23     | 3.5035  |
| 2     | 27.547          | 1.0965      | 6164025.50  | 83056.55    | 96.4965 |

**43: racemic**

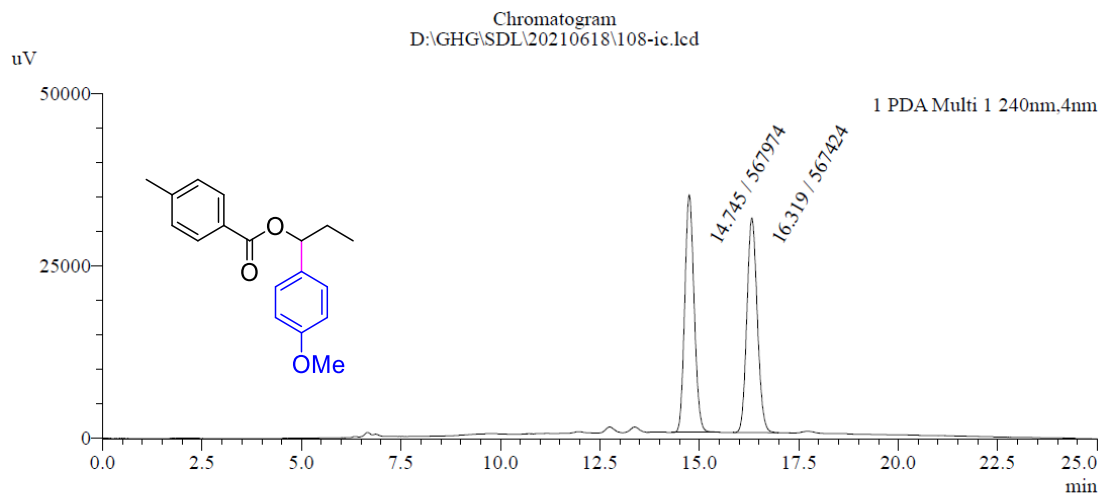

Peak Table

PDA Ch1 240nm

| Peak# | Ret. Time [min] | Width [min] | Area [uV*s] | Height [uV] | Area %  |
|-------|-----------------|-------------|-------------|-------------|---------|
| 1     | 14.745          | 0.2545      | 567973.53   | 34467.11    | 50.0242 |
| 2     | 16.319          | 0.2822      | 567424.38   | 31131.60    | 49.9758 |

**43: enantioenriched, 92% ee**

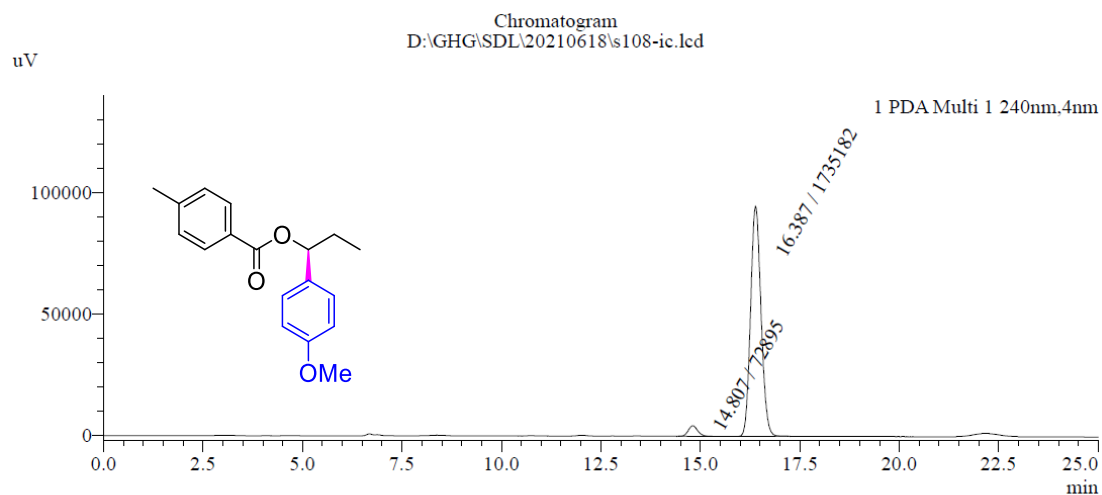

Peak Table

PDA Ch1 240nm

| Peak# | Ret. Time [min] | Width [min] | Area [uV*s] | Height [uV] | Area %  |
|-------|-----------------|-------------|-------------|-------------|---------|
| 1     | 14.807          | 0.2568      | 72894.50    | 4360.18     | 4.0316  |
| 2     | 16.387          | 0.2835      | 1735182.19  | 94724.21    | 95.9684 |

**44: racemic**

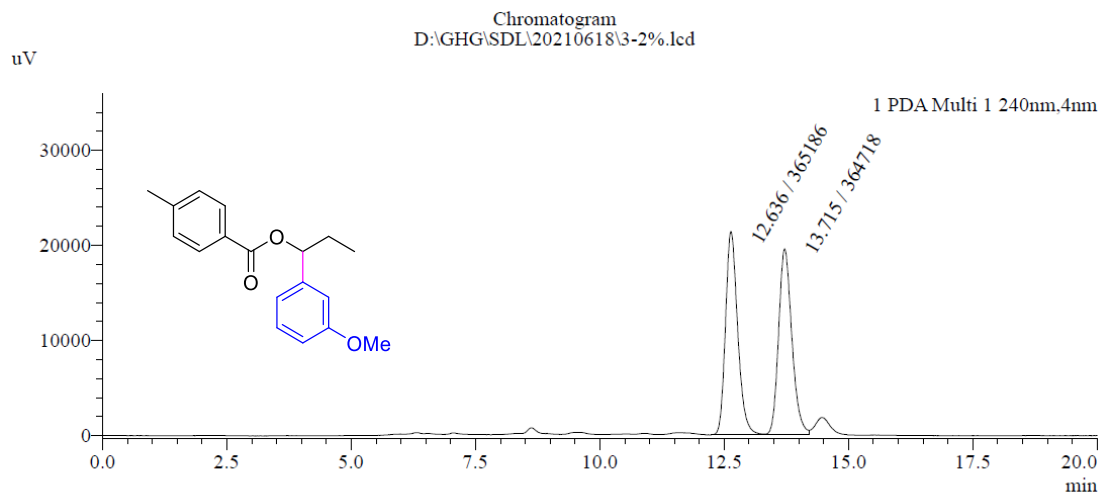

Peak Table

| Peak# | Ret. Time [min] | Width [min] | Area [uV*s] | Height [uV] | Area %  |
|-------|-----------------|-------------|-------------|-------------|---------|
| 1     | 12.636          | 0.2577      | 365186.16   | 21381.72    | 50.0321 |
| 2     | 13.715          | 0.2823      | 364718.25   | 19577.80    | 49.9679 |

**44: enantioenriched, 92% ee**

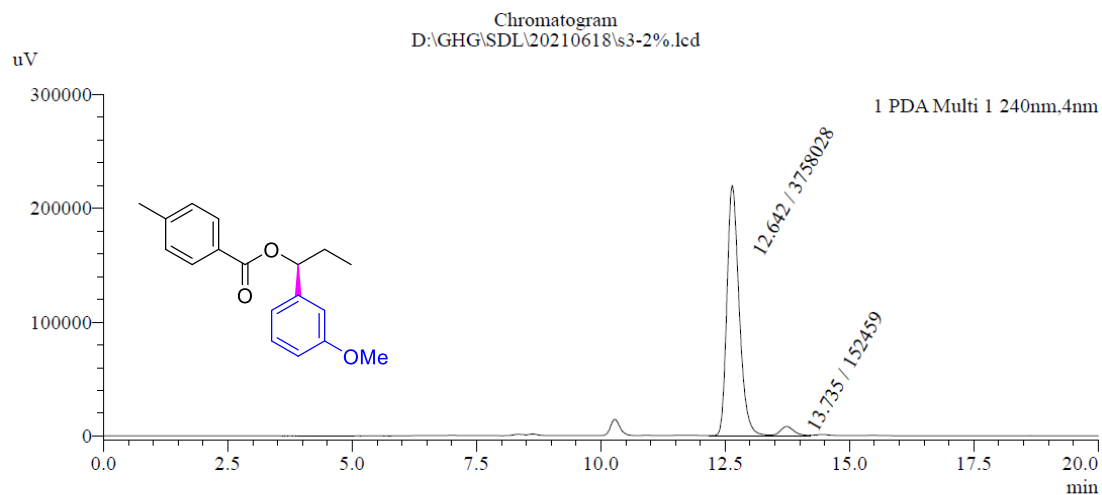

Peak Table

| Peak# | Ret. Time [min] | Width [min] | Area [uV*s] | Height [uV] | Area %  |
|-------|-----------------|-------------|-------------|-------------|---------|
| 1     | 12.642          | 0.2583      | 3758027.87  | 219655.12   | 96.1013 |
| 2     | 13.735          | 0.2816      | 152458.82   | 8093.64     | 3.8987  |

45: racemic

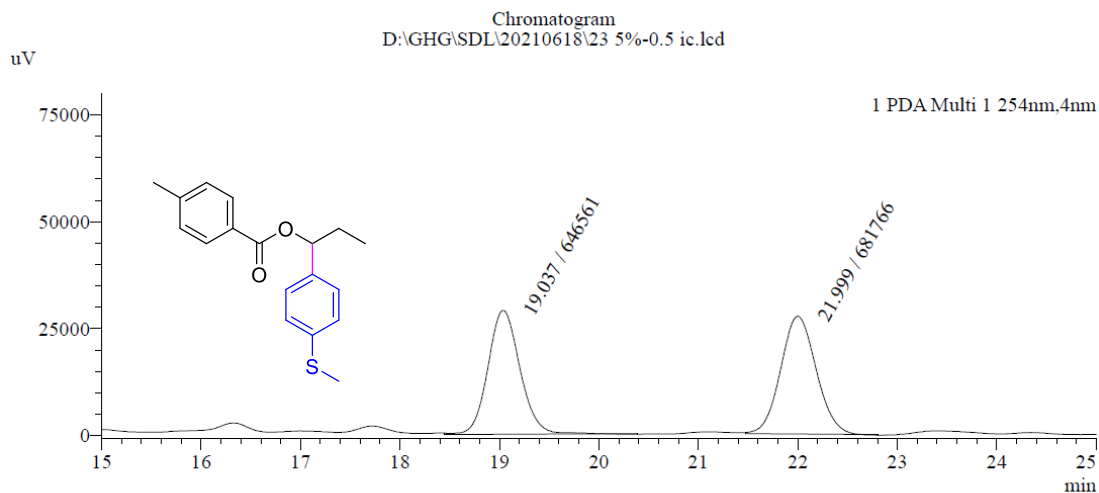

Peak Table

| Peak# | Ret. Time [min] | Width [min] | Area [uV*s] | Height [uV] | Area %  |
|-------|-----------------|-------------|-------------|-------------|---------|
| 1     | 19.037          | 0.3406      | 646560.67   | 28955.14    | 48.6748 |
| 2     | 21.999          | 0.3849      | 681765.89   | 27510.48    | 51.3252 |

45: enantioenriched, 93% ee

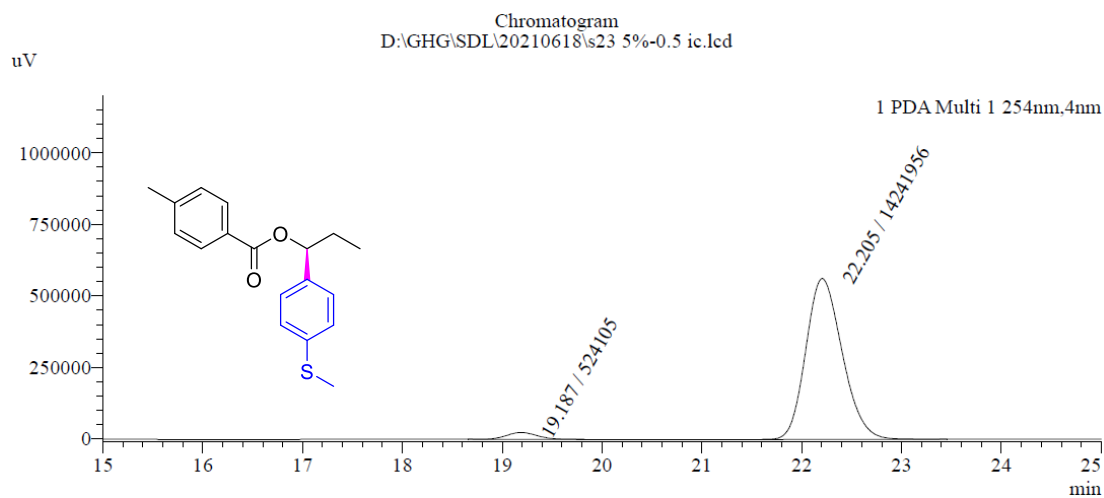

Peak Table

| Peak# | Ret. Time [min] | Width [min] | Area [uV*s] | Height [uV] | Area %  |
|-------|-----------------|-------------|-------------|-------------|---------|
| 1     | 19.187          | 0.3350      | 524105.21   | 24274.11    | 3.5494  |
| 2     | 22.205          | 0.3922      | 14241956.43 | 562156.32   | 96.4506 |



**46: racemic**

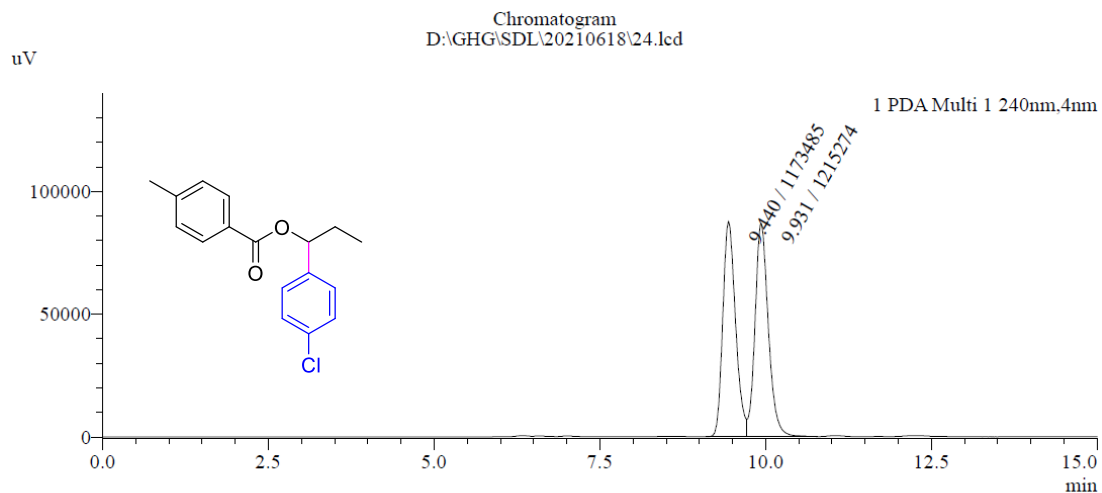

Peak Table

| Peak# | Ret. Time [min] | Width [min] | Area [uV*s] | Height [uV] | Area %  |
|-------|-----------------|-------------|-------------|-------------|---------|
| 1     | 9.440           | 0.2052      | 1173484.85  | 87559.55    | 49.1253 |
| 2     | 9.931           | 0.2091      | 1215273.80  | 86920.05    | 50.8747 |

**46: enantioenriched, 92% ee**

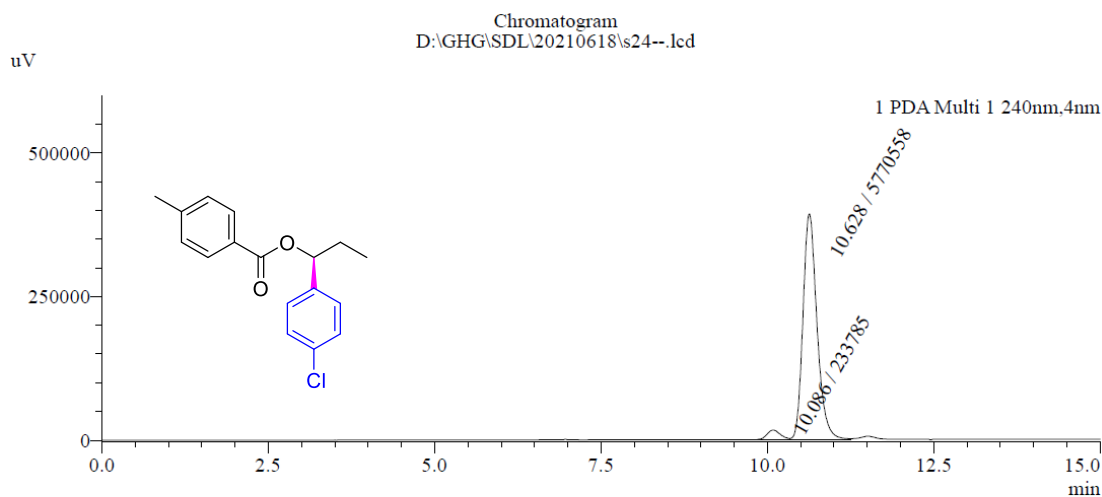

Peak Table

| Peak# | Ret. Time [min] | Width [min] | Area [uV*s] | Height [uV] | Area %  |
|-------|-----------------|-------------|-------------|-------------|---------|
| 1     | 10.086          | 0.2171      | 233784.97   | 16707.83    | 3.8936  |
| 2     | 10.628          | 0.2206      | 5770557.86  | 393308.95   | 96.1064 |

47: racemic

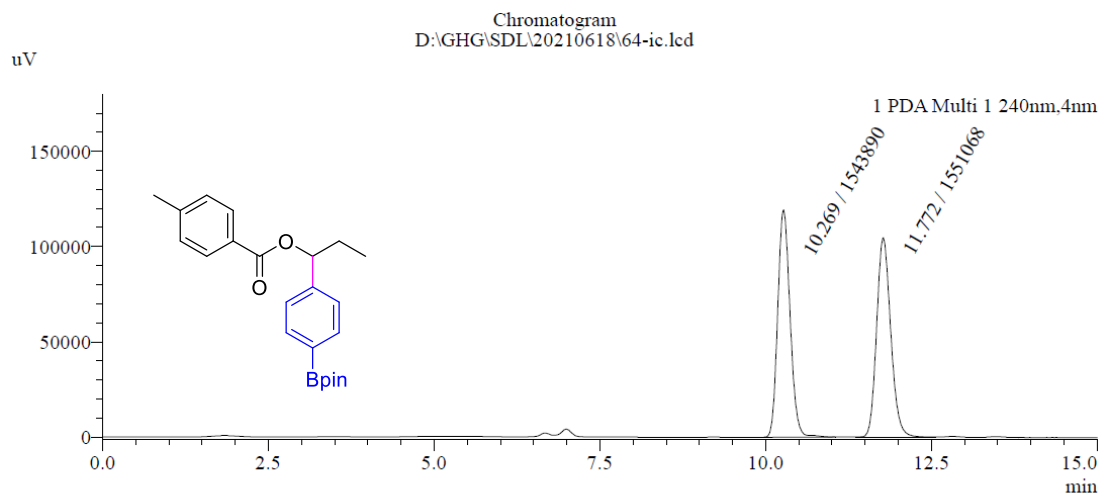

Peak Table

| Peak# | Ret. Time [min] | Width [min] | Area [uV*s] | Height [uV] | Area %  |
|-------|-----------------|-------------|-------------|-------------|---------|
| 1     | 10.269          | 0.1987      | 1543889.79  | 119309.44   | 49.8840 |
| 2     | 11.772          | 0.2269      | 1551068.21  | 104623.00   | 50.1160 |

47: enantioenriched, 92% ee

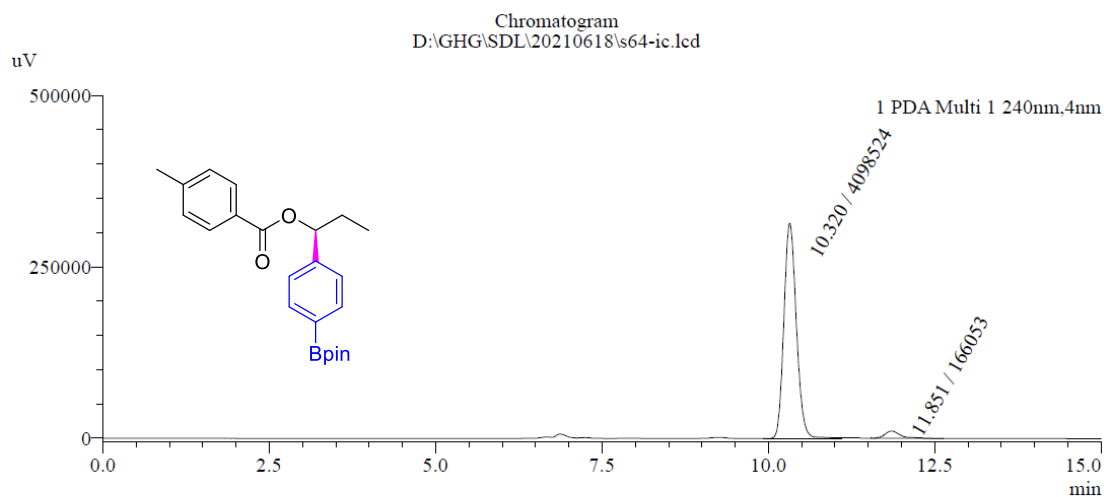

Peak Table

| Peak# | Ret. Time [min] | Width [min] | Area [uV*s] | Height [uV] | Area %  |
|-------|-----------------|-------------|-------------|-------------|---------|
| 1     | 10.320          | 0.2002      | 4098524.40  | 314045.80   | 96.1062 |
| 2     | 11.851          | 0.2280      | 166053.22   | 10416.64    | 3.8938  |

**48: racemic**

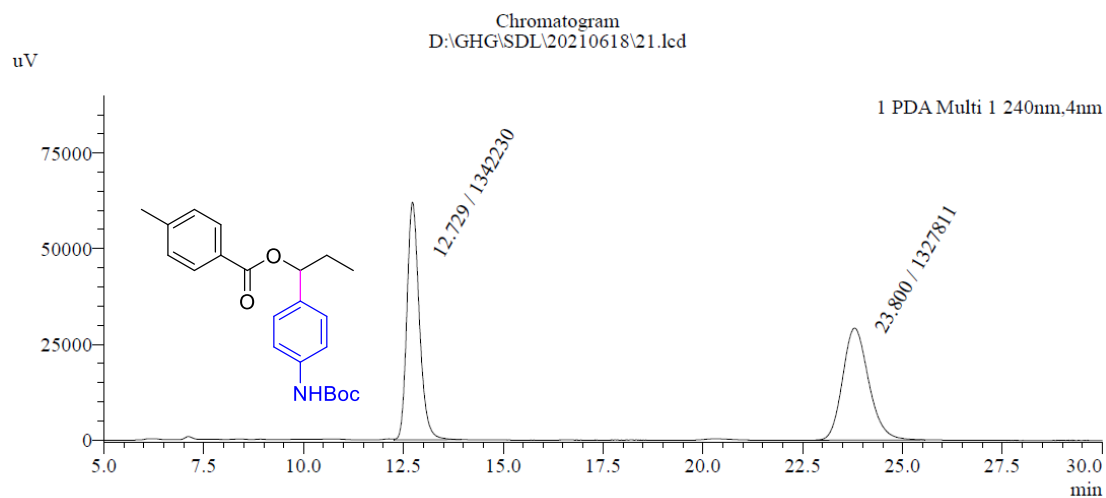

Peak Table

PDA Ch1 240nm

| Peak# | Ret. Time [min] | Width [min] | Area [uV*s] | Height [uV] | Area %  |
|-------|-----------------|-------------|-------------|-------------|---------|
| 1     | 12.729          | 0.3253      | 1342229.72  | 62092.46    | 50.2700 |
| 2     | 23.800          | 0.6924      | 1327811.32  | 29285.78    | 49.7300 |

**48: enantioenriched, 92% ee**

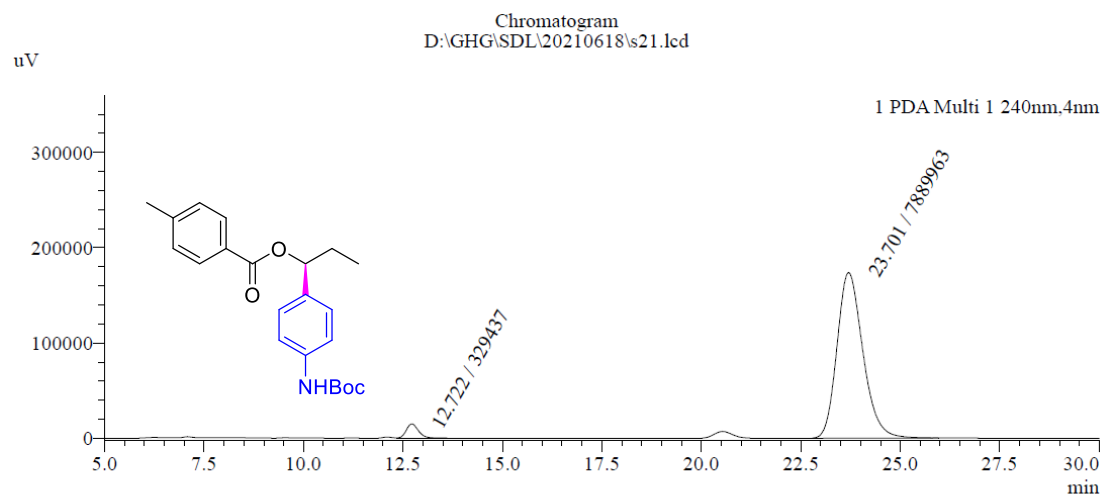

Peak Table

PDA Ch1 240nm

| Peak# | Ret. Time [min] | Width [min] | Area [uV*s] | Height [uV] | Area %  |
|-------|-----------------|-------------|-------------|-------------|---------|
| 1     | 12.722          | 0.3260      | 329436.55   | 15151.10    | 4.0080  |
| 2     | 23.701          | 0.6893      | 7889962.85  | 174036.16   | 95.9920 |

49: racemic

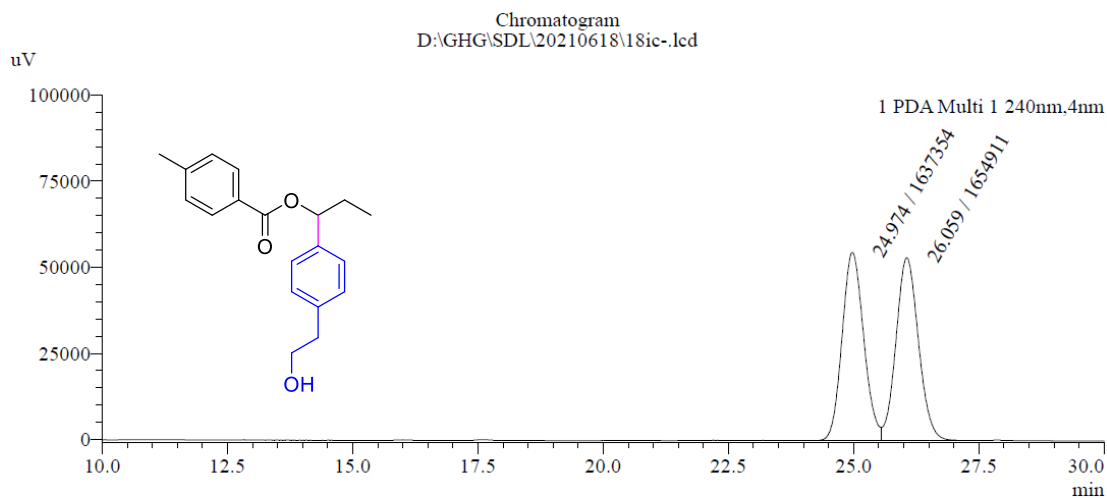

Peak Table

| Peak# | Ret. Time [min] | Width [min] | Area [uV*s] | Height [uV] | Area %  |
|-------|-----------------|-------------|-------------|-------------|---------|
| 1     | 24.974          | 0.4658      | 1637353.86  | 54598.78    | 49.7334 |
| 2     | 26.059          | 0.4811      | 1654911.01  | 53020.13    | 50.2666 |

49: enantioenriched, 92% ee

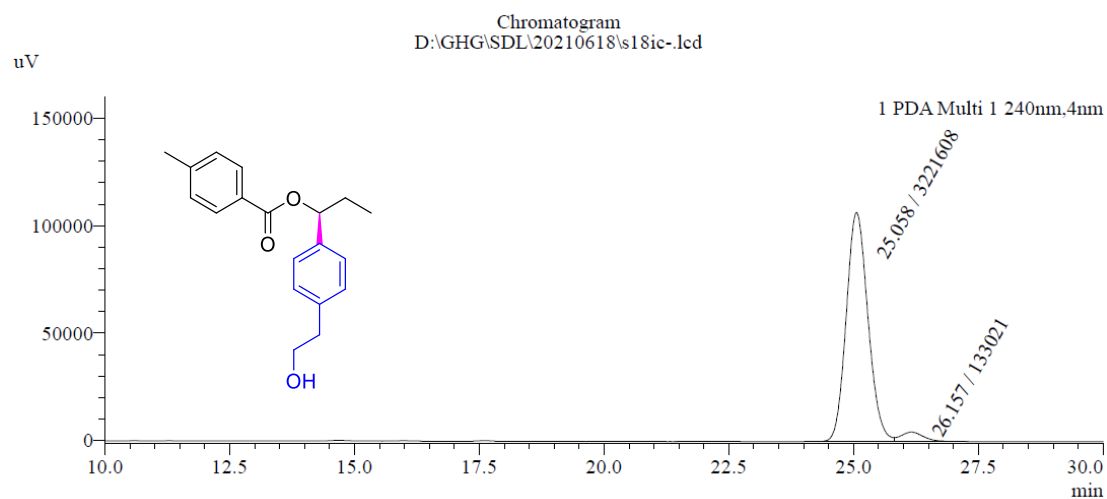

Peak Table

| Peak# | Ret. Time [min] | Width [min] | Area [uV*s] | Height [uV] | Area %  |
|-------|-----------------|-------------|-------------|-------------|---------|
| 1     | 25.058          | 0.4676      | 3221608.35  | 106477.25   | 96.0347 |
| 2     | 26.157          | 0.5097      | 133020.93   | 4303.36     | 3.9653  |

### 50: racemic

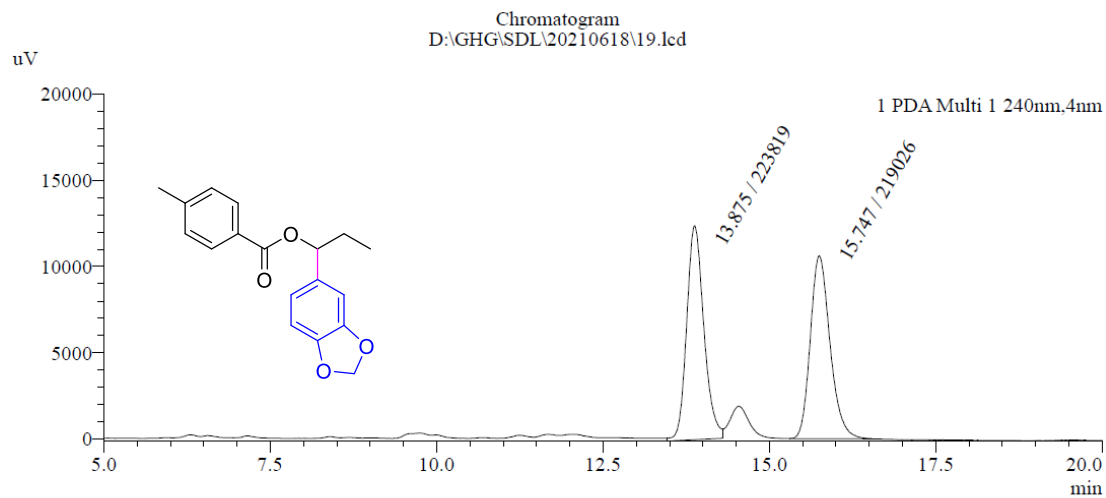

Peak Table

PDA Ch1 240nm

| Peak# | Ret. Time [min] | Width [min] | Area [uV*s] | Height [uV] | Area %  |
|-------|-----------------|-------------|-------------|-------------|---------|
| 1     | 13.875          | 0.2721      | 223818.80   | 12403.02    | 50.5412 |
| 2     | 15.747          | 0.3130      | 219025.52   | 10596.12    | 49.4588 |

### 50: enantioenriched, 91% ee

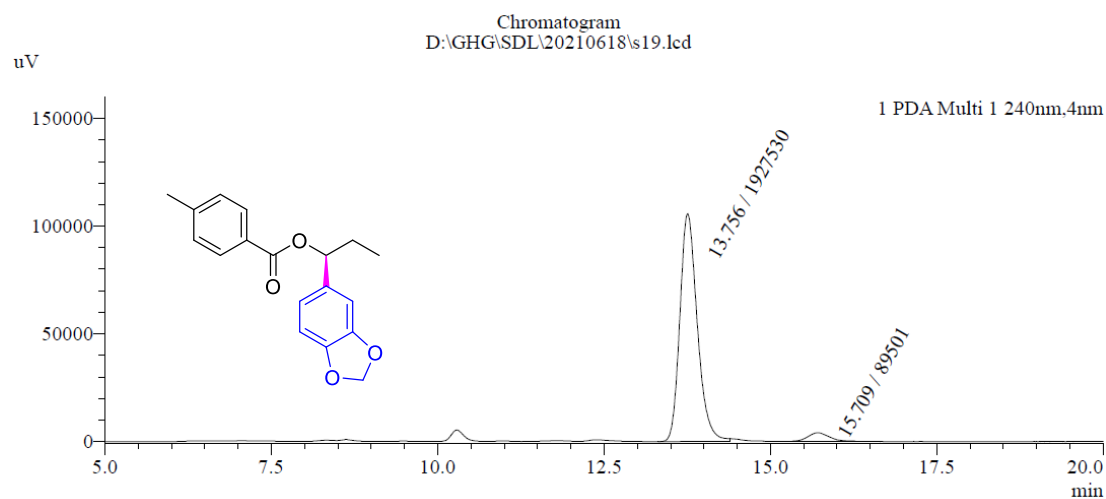

Peak Table

PDA Ch1 240nm

| Peak# | Ret. Time [min] | Width [min] | Area [uV*s] | Height [uV] | Area %  |
|-------|-----------------|-------------|-------------|-------------|---------|
| 1     | 13.756          | 0.2747      | 1927530.25  | 105670.98   | 95.5628 |
| 2     | 15.709          | 0.3393      | 89500.52    | 3986.93     | 4.4372  |

**51: racemic**

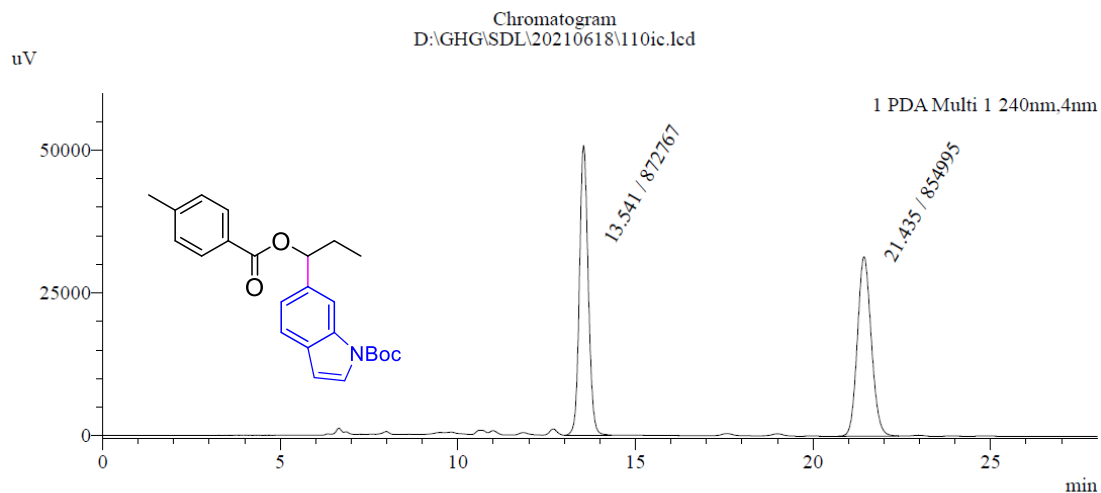

Peak Table

| Peak# | Ret. Time [min] | Width [min] | Area [uV*s] | Height [uV] | Area %  |
|-------|-----------------|-------------|-------------|-------------|---------|
| 1     | 13.541          | 0.2615      | 872767.16   | 50763.89    | 50.5143 |
| 2     | 21.435          | 0.4184      | 854995.07   | 31454.69    | 49.4857 |

**51: enantioenriched, 90% ee**

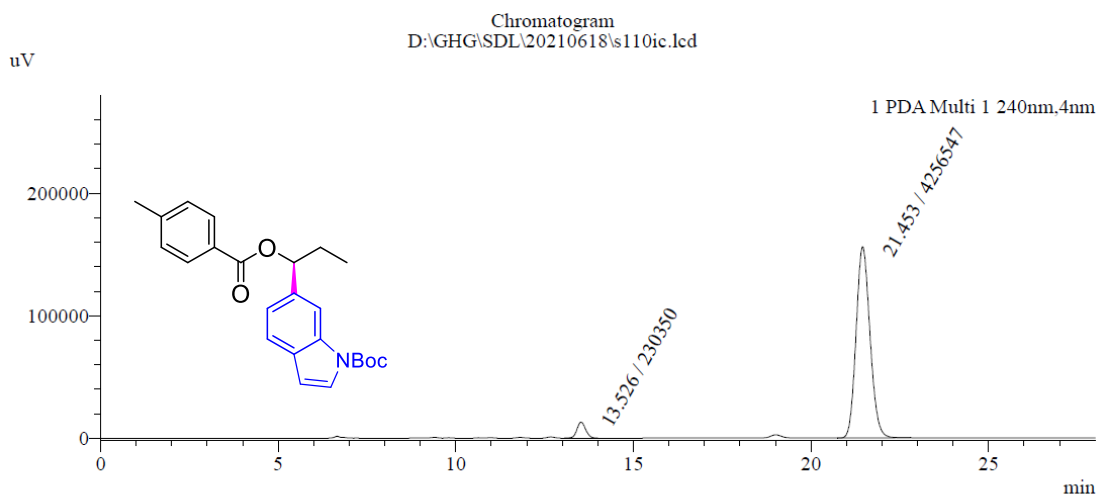

Peak Table

| Peak# | Ret. Time [min] | Width [min] | Area [uV*s] | Height [uV] | Area %  |
|-------|-----------------|-------------|-------------|-------------|---------|
| 1     | 13.526          | 0.2637      | 230350.18   | 13212.32    | 5.1338  |
| 2     | 21.453          | 0.4197      | 4256546.61  | 156152.51   | 94.8662 |

**52: racemic**

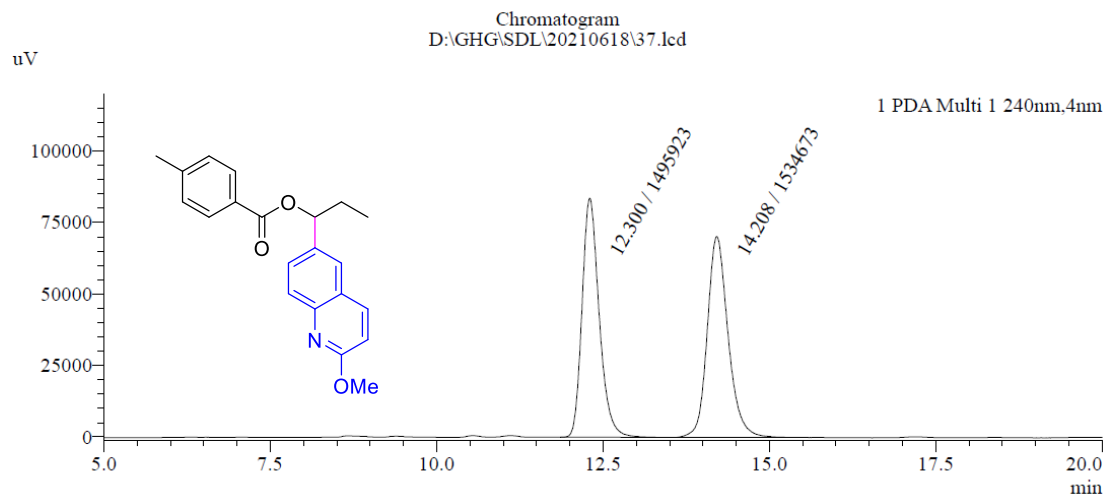

Peak Table

| Peak# | Ret. Time [min] | Width [min] | Area [uV*s] | Height [uV] | Area %  |
|-------|-----------------|-------------|-------------|-------------|---------|
| 1     | 12.300          | 0.2686      | 1495922.60  | 83641.69    | 49.3607 |
| 2     | 14.208          | 0.3225      | 1534673.05  | 70349.47    | 50.6393 |

**52: enantioenriched, 93% ee**

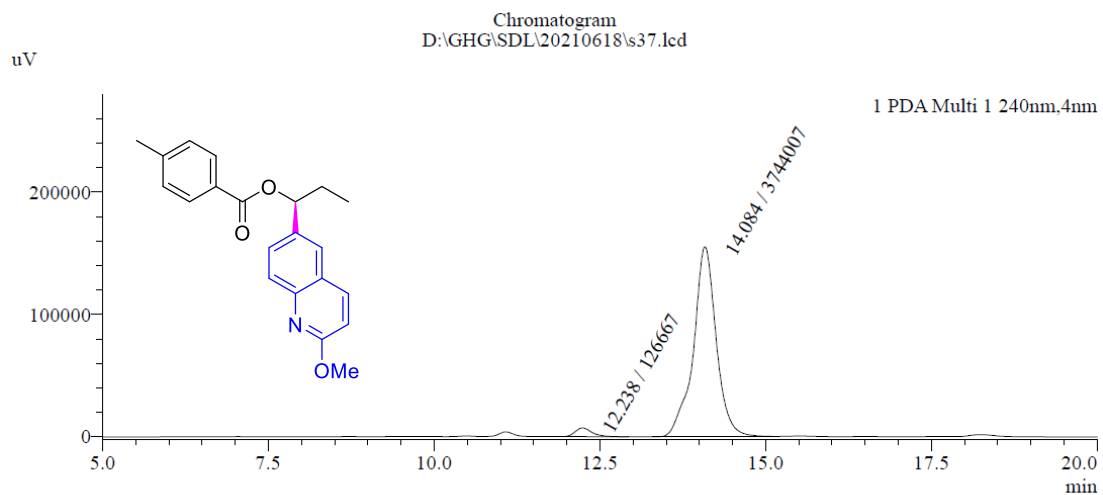

Peak Table

| Peak# | Ret. Time [min] | Width [min] | Area [uV*s] | Height [uV] | Area %  |
|-------|-----------------|-------------|-------------|-------------|---------|
| 1     | 12.238          | 0.2652      | 126667.00   | 7110.86     | 3.2725  |
| 2     | 14.084          | 0.3330      | 3744006.57  | 155435.10   | 96.7275 |

**53: racemic**

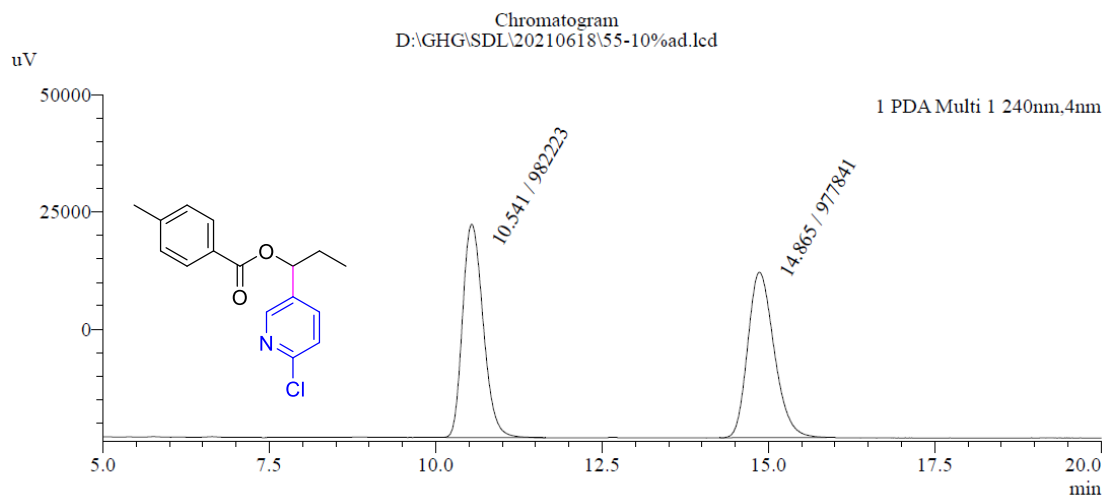

Peak Table

| Peak# | Ret. Time [min] | Width [min] | Area [uV*s] | Height [uV] | Area %  |
|-------|-----------------|-------------|-------------|-------------|---------|
| 1     | 10.541          | 0.3352      | 982223.33   | 45490.77    | 50.1118 |
| 2     | 14.865          | 0.4262      | 977841.47   | 35293.83    | 49.8882 |

**53: enantioenriched, 92% ee**

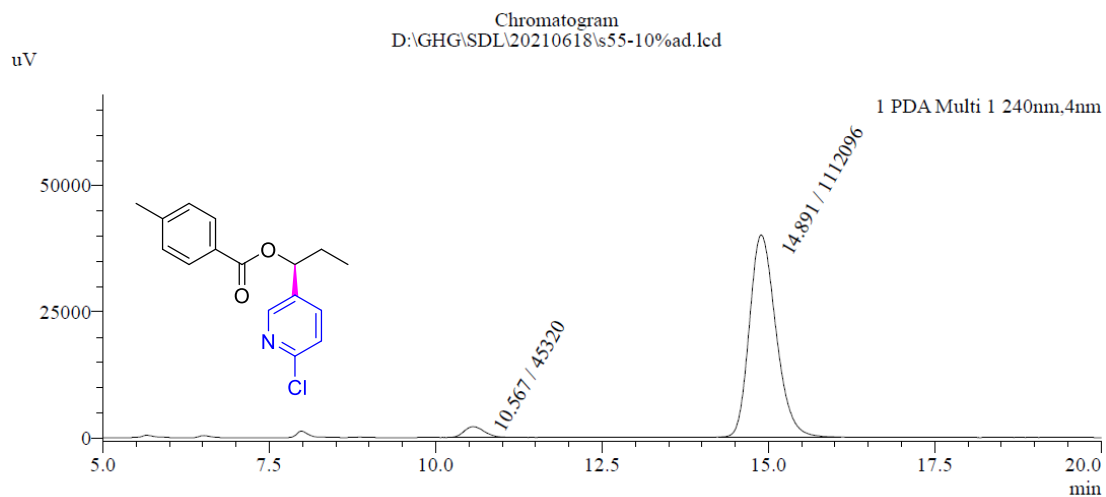

Peak Table

| Peak# | Ret. Time [min] | Width [min] | Area [uV*s] | Height [uV] | Area %  |
|-------|-----------------|-------------|-------------|-------------|---------|
| 1     | 10.567          | 0.3364      | 45320.24    | 2117.28     | 3.9156  |
| 2     | 14.891          | 0.4268      | 1112095.62  | 40022.85    | 96.0844 |



**54: racemic**

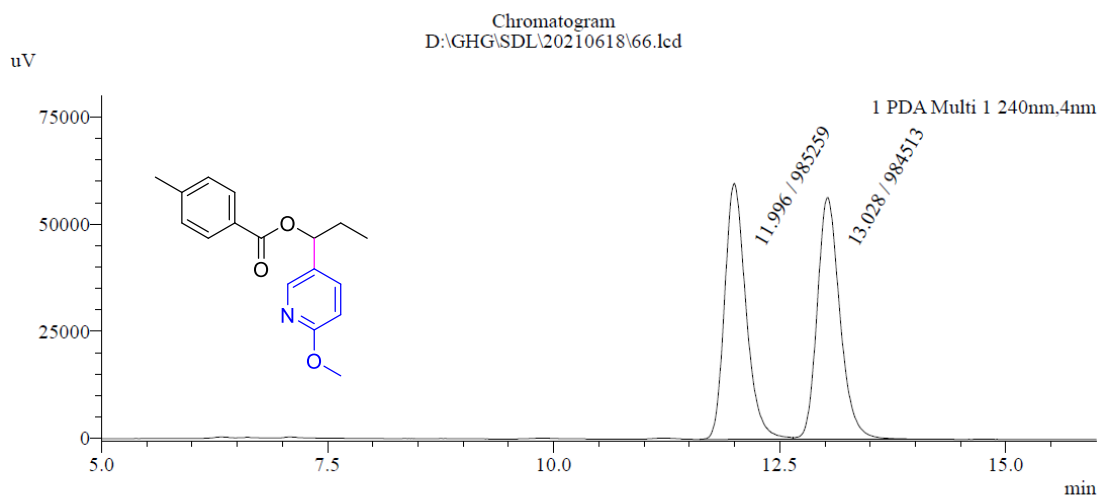

Peak Table

| PDA Ch1 240nm |                 |             |             |             |         |
|---------------|-----------------|-------------|-------------|-------------|---------|
| Peak#         | Ret. Time [min] | Width [min] | Area [uV*s] | Height [uV] | Area %  |
| 1             | 11.996          | 0.2480      | 985259.42   | 59667.86    | 50.0189 |
| 2             | 13.028          | 0.2631      | 984513.12   | 56391.61    | 49.9811 |

**54: enantioenriched, 92% ee**

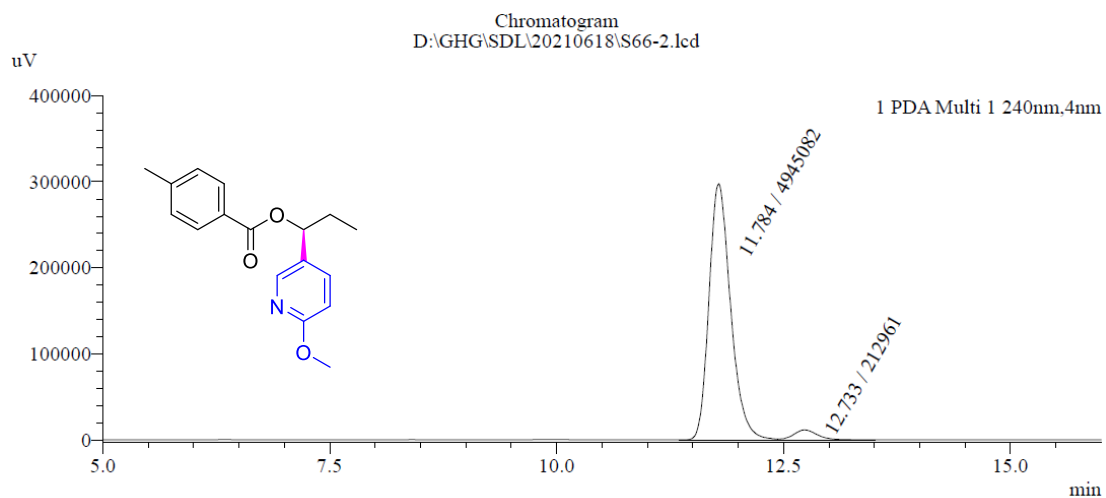

Peak Table

| PDA Ch1 240nm |                 |             |             |             |         |
|---------------|-----------------|-------------|-------------|-------------|---------|
| Peak#         | Ret. Time [min] | Width [min] | Area [uV*s] | Height [uV] | Area %  |
| 1             | 11.784          | 0.2514      | 4945082.45  | 297502.16   | 95.8713 |
| 2             | 12.733          | 0.2715      | 212960.98   | 11652.57    | 4.1287  |

**55: racemic**

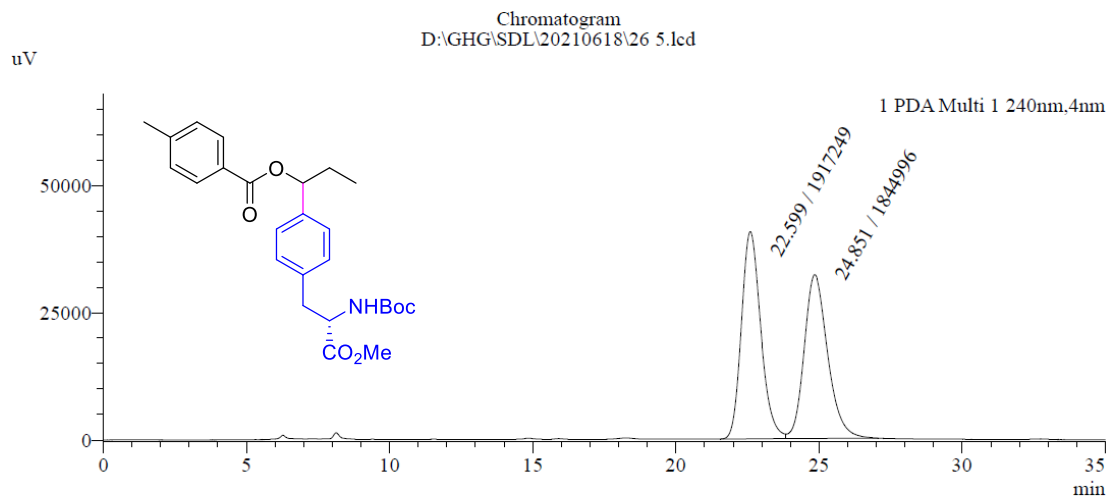

Peak Table

PDA Ch1 240nm

| Peak# | Ret. Time [min] | Width [min] | Area [uV*s] | Height [uV] | Area %  |
|-------|-----------------|-------------|-------------|-------------|---------|
| 1     | 22.599          | 0.7189      | 1917249.21  | 40724.75    | 50.9602 |
| 2     | 24.851          | 0.8644      | 1844996.15  | 32207.90    | 49.0398 |

**55: enantioenriched, 93% de**

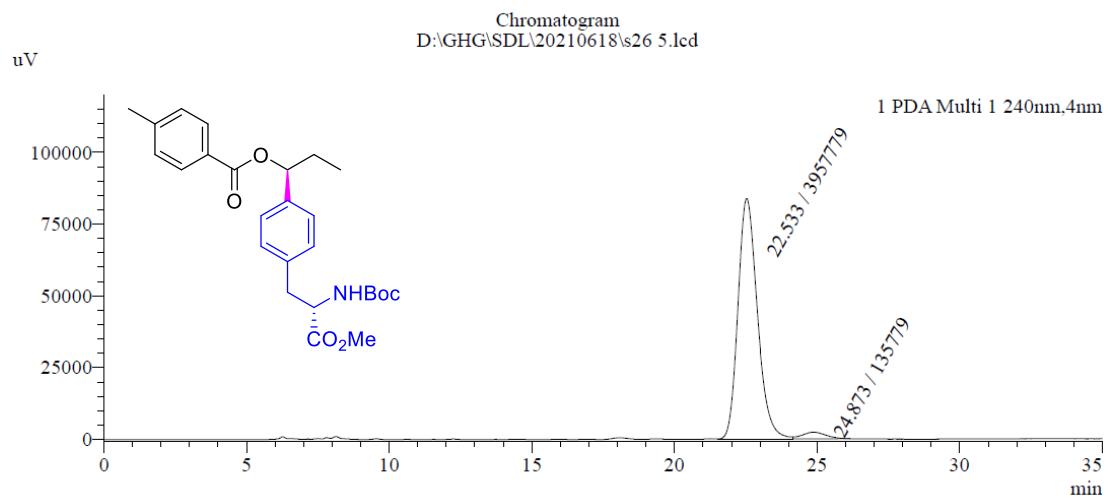

Peak Table

PDA Ch1 240nm

| Peak# | Ret. Time [min] | Width [min] | Area [uV*s] | Height [uV] | Area %  |
|-------|-----------------|-------------|-------------|-------------|---------|
| 1     | 22.533          | 0.7199      | 3957779.01  | 83663.17    | 96.6831 |
| 2     | 24.873          | 0.9219      | 135778.79   | 2321.57     | 3.3169  |

**56: racemic**

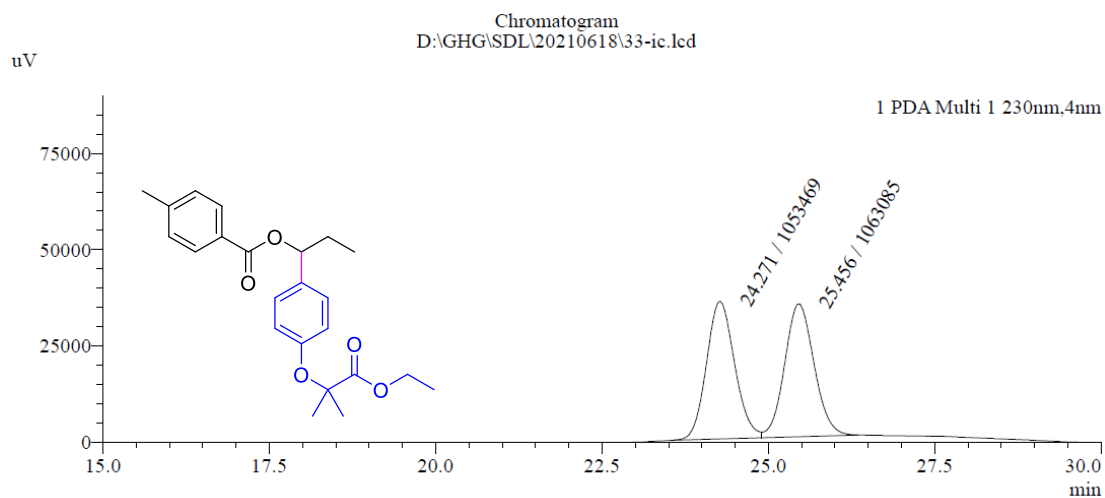

Peak Table

| Peak# | Ret. Time [min] | Width [min] | Area [uV*s] | Height [uV] | Area %  |
|-------|-----------------|-------------|-------------|-------------|---------|
| 1     | 24.271          | 0.4559      | 1053468.96  | 35682.85    | 49.7728 |
| 2     | 25.456          | 0.4739      | 1063084.81  | 34524.11    | 50.2272 |

**56: enantioenriched, 91% ee**

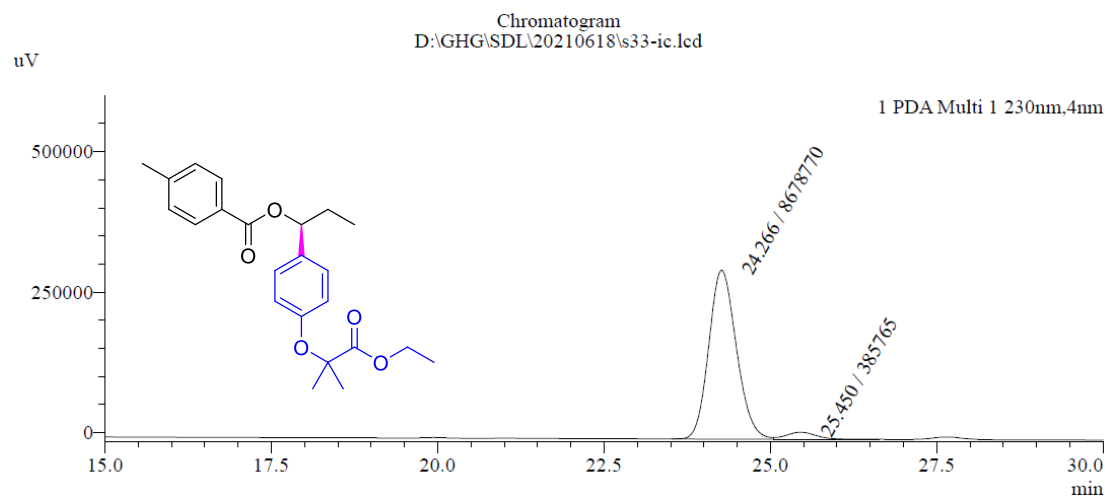

Peak Table

| Peak# | Ret. Time [min] | Width [min] | Area [uV*s] | Height [uV] | Area %  |
|-------|-----------------|-------------|-------------|-------------|---------|
| 1     | 24.266          | 0.4468      | 8678770.27  | 300518.03   | 95.7442 |
| 2     | 25.450          | 0.4766      | 385765.42   | 12533.92    | 4.2558  |

**(S)-57**: enantioenriched, 93% ee

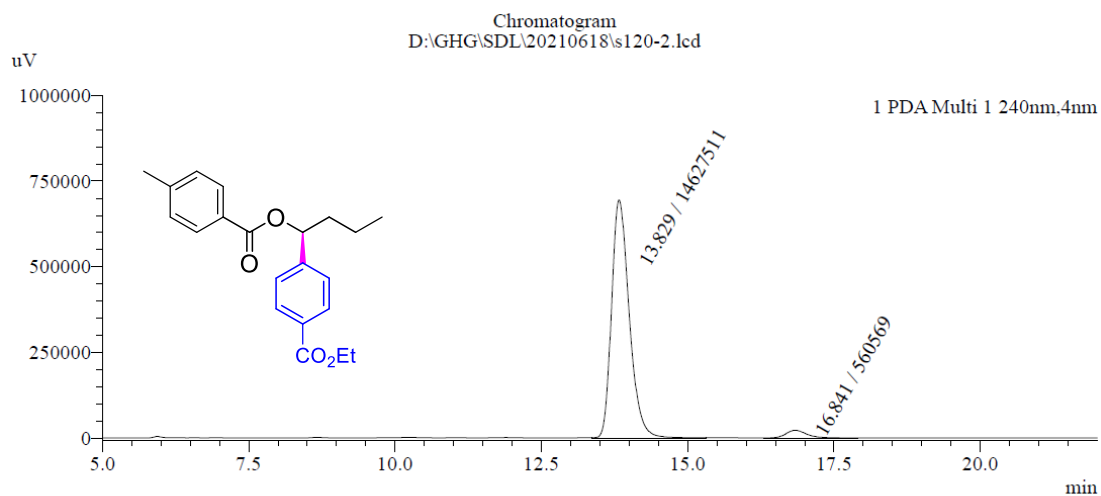

Peak Table

PDA Ch1 240nm

| Peak# | Ret. Time [min] | Width [min] | Area [uV*s] | Height [uV] | Area %  |
|-------|-----------------|-------------|-------------|-------------|---------|
| 1     | 13.829          | 0.3186      | 14627511.15 | 694688.83   | 96.3091 |
| 2     | 16.841          | 0.3726      | 560569.48   | 22410.41    | 3.6909  |

**57**: enantioenriched, -93% ee

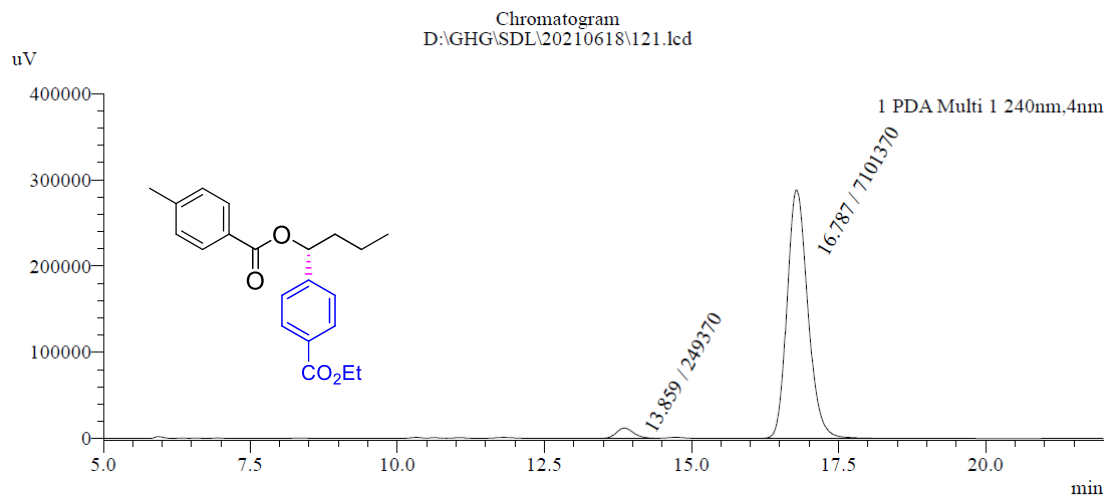

Peak Table

PDA Ch1 240nm

| Peak# | Ret. Time [min] | Width [min] | Area [uV*s] | Height [uV] | Area %  |
|-------|-----------------|-------------|-------------|-------------|---------|
| 1     | 13.859          | 0.3163      | 249370.28   | 12026.50    | 3.3925  |
| 2     | 16.787          | 0.3745      | 7101370.31  | 288524.27   | 96.6075 |

**58: racemic**

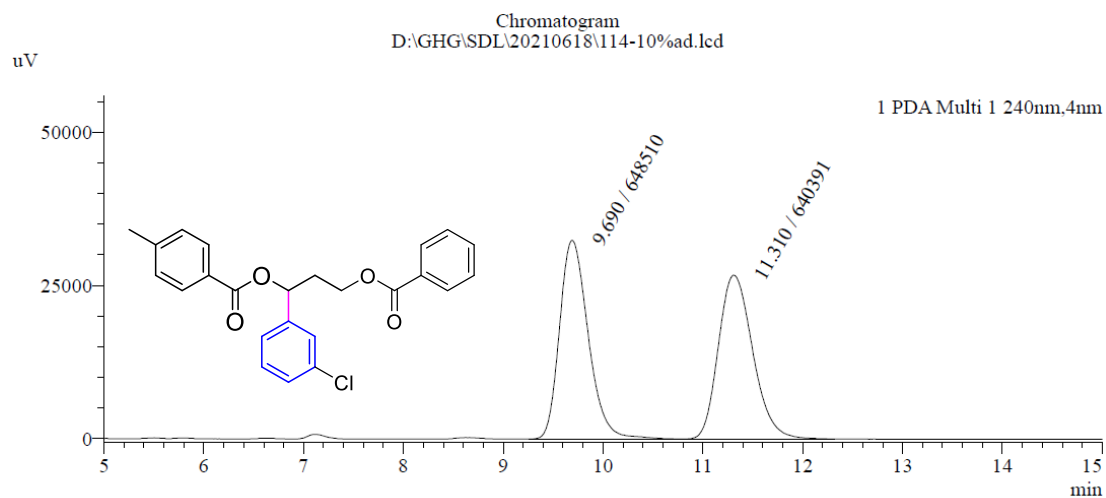

Peak Table

| Peak# | Ret. Time [min] | Width [min] | Area [uV*s] | Height [uV] | Area %  |
|-------|-----------------|-------------|-------------|-------------|---------|
| 1     | 9.690           | 0.3052      | 648509.60   | 32445.81    | 50.3150 |
| 2     | 11.310          | 0.3711      | 640390.60   | 26755.43    | 49.6850 |

**58: enantioenriched, 87% ee**

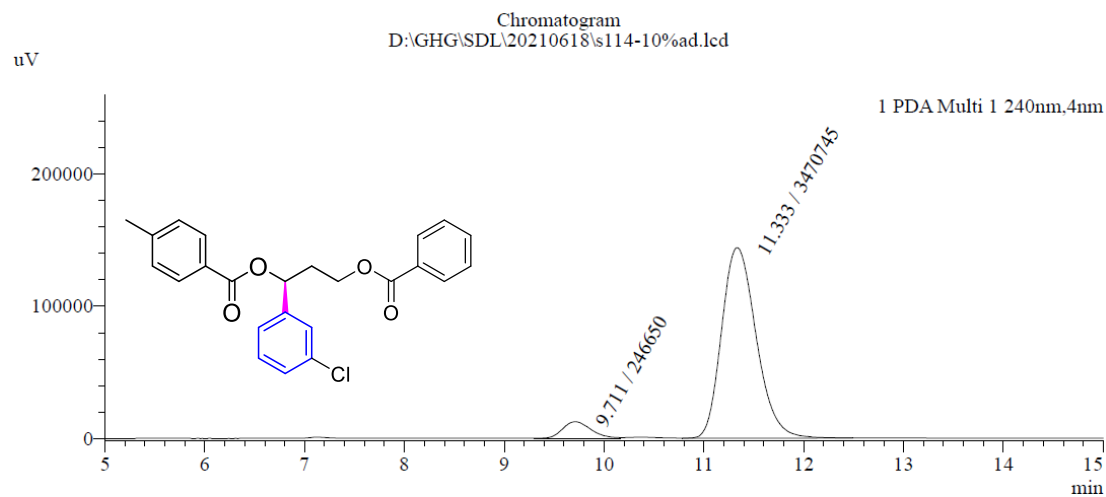

Peak Table

| Peak# | Ret. Time [min] | Width [min] | Area [uV*s] | Height [uV] | Area %  |
|-------|-----------------|-------------|-------------|-------------|---------|
| 1     | 9.711           | 0.3056      | 246649.56   | 12505.64    | 6.6350  |
| 2     | 11.333          | 0.3730      | 3470744.89  | 144055.52   | 93.3650 |

**59: racemic**

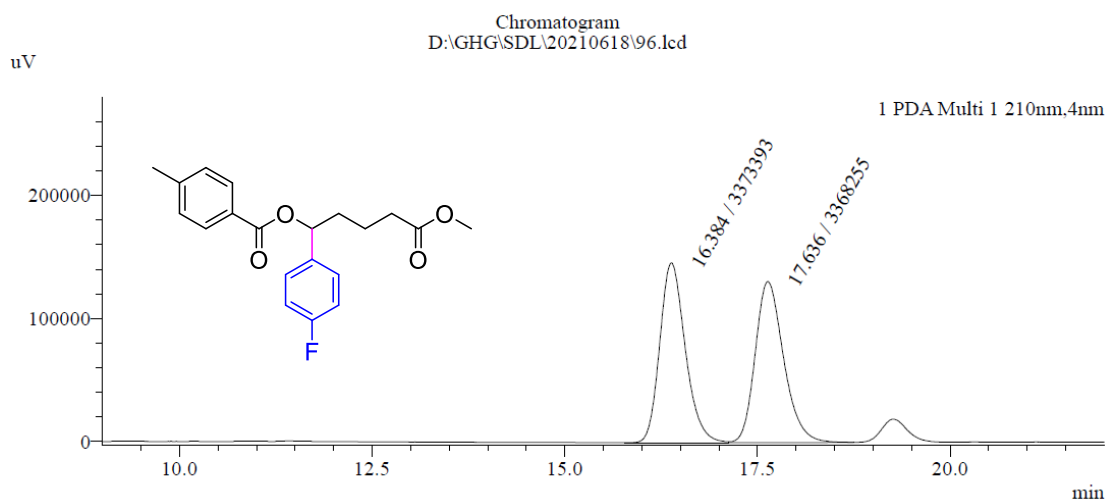

Peak Table

PDA Ch1 210nm

| Peak# | Ret. Time [min] | Width [min] | Area [uV*s] | Height [uV] | Area %  |
|-------|-----------------|-------------|-------------|-------------|---------|
| 1     | 16.384          | 0.3511      | 3373393.33  | 146358.84   | 50.0381 |
| 2     | 17.636          | 0.3906      | 3368254.54  | 131007.56   | 49.9619 |

**59: enantioenriched, 91% ee**

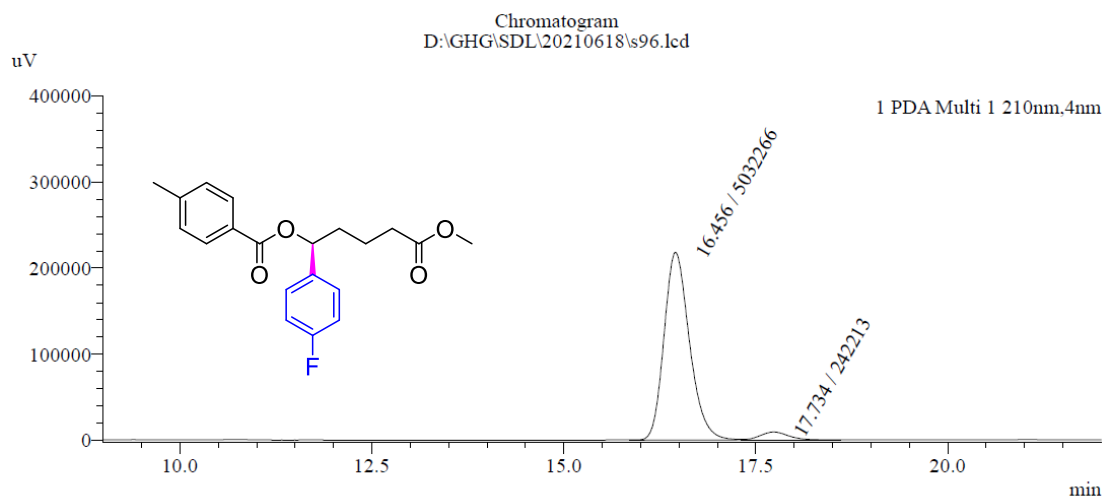

Peak Table

PDA Ch1 210nm

| Peak# | Ret. Time [min] | Width [min] | Area [uV*s] | Height [uV] | Area %  |
|-------|-----------------|-------------|-------------|-------------|---------|
| 1     | 16.456          | 0.3511      | 5032265.53  | 217900.64   | 95.4078 |
| 2     | 17.734          | 0.3922      | 242213.17   | 9301.55     | 4.5922  |

**(S)-60:** enantioenriched, 92% ee

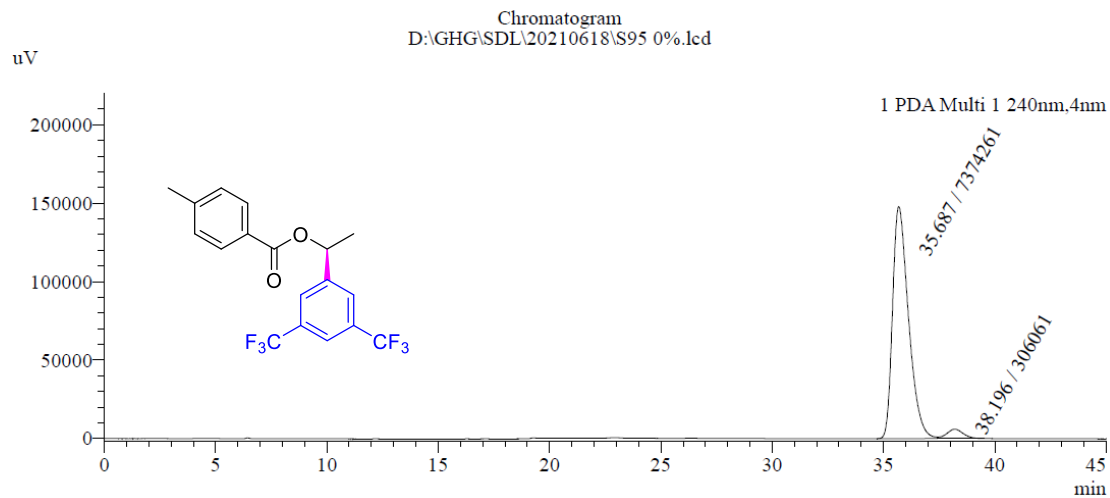

Peak Table

| Peak# | Ret. Time [min] | Width [min] | Area [uV*s] | Height [uV] | Area %  |
|-------|-----------------|-------------|-------------|-------------|---------|
| 1     | 35.687          | 0.7601      | 7374261.47  | 147784.40   | 96.0150 |
| 2     | 38.196          | 0.7871      | 306060.64   | 5956.23     | 3.9850  |

**60:** enantioenriched, -92% ee

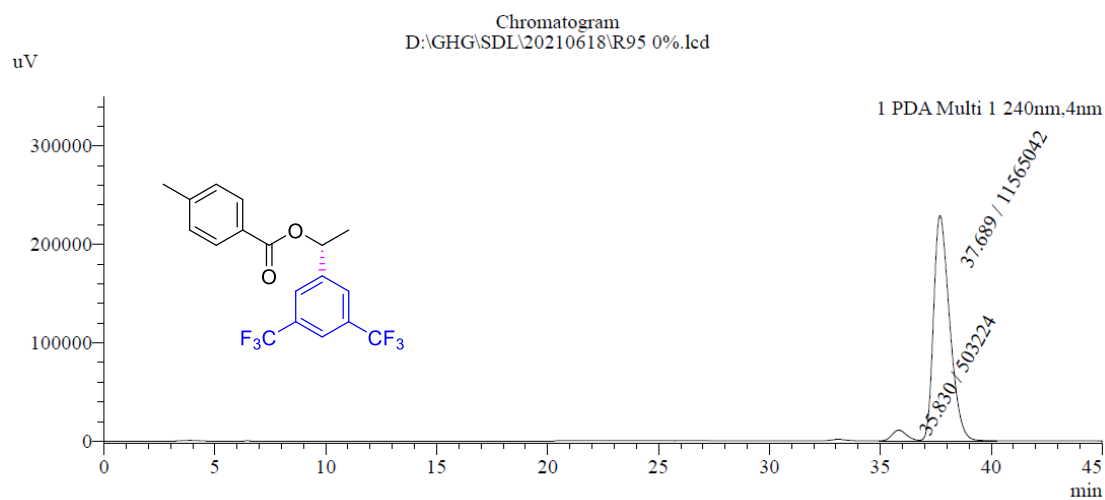

Peak Table

| Peak# | Ret. Time [min] | Width [min] | Area [uV*s] | Height [uV] | Area %  |
|-------|-----------------|-------------|-------------|-------------|---------|
| 1     | 35.830          | 0.7225      | 503223.78   | 10843.41    | 4.1698  |
| 2     | 37.689          | 0.7767      | 11565042.49 | 228964.60   | 95.8302 |

**61: racemic**

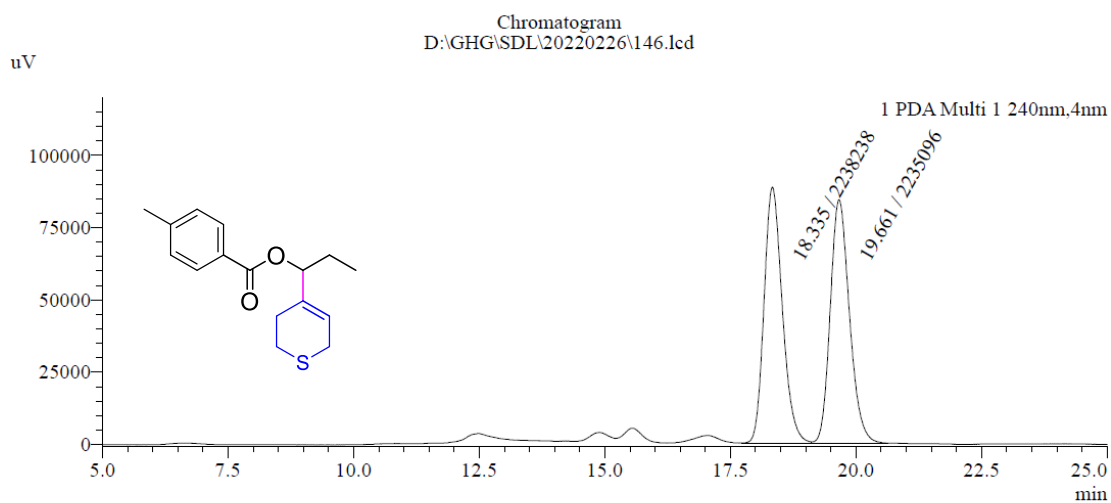

Peak Table

PDA Ch1 240nm

| Peak# | Ret. Time [min] | Width [min] | Area [uV*s] | Height [uV] | Area %  |
|-------|-----------------|-------------|-------------|-------------|---------|
| 1     | 18.335          | 0.3872      | 2238237.77  | 88486.32    | 50.0351 |
| 2     | 19.661          | 0.4064      | 2235096.27  | 84135.09    | 49.9649 |

**61: enantioenriched, 90% ee**

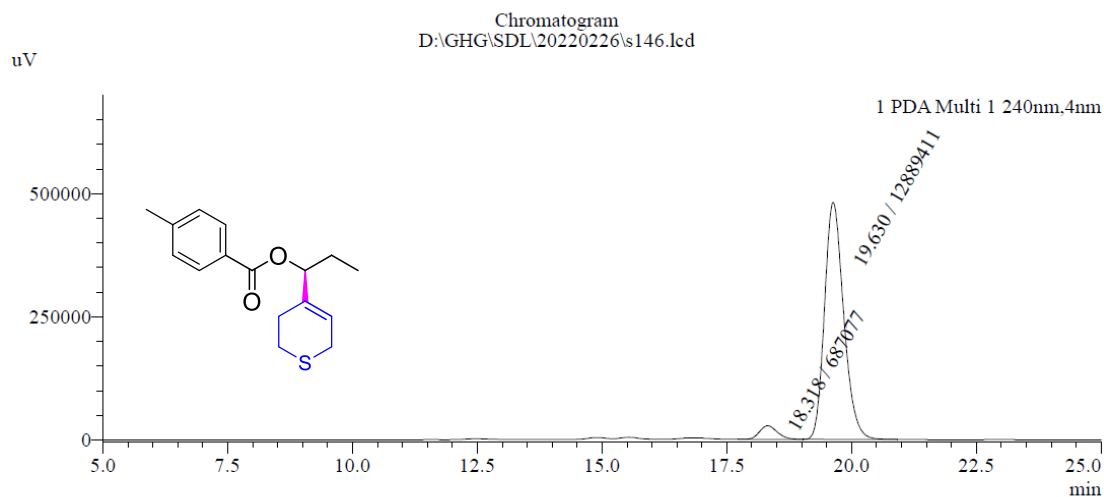

Peak Table

PDA Ch1 240nm

| Peak# | Ret. Time [min] | Width [min] | Area [uV*s] | Height [uV] | Area %  |
|-------|-----------------|-------------|-------------|-------------|---------|
| 1     | 18.318          | 0.3825      | 687076.80   | 27640.42    | 5.0608  |
| 2     | 19.630          | 0.4096      | 12889411.24 | 481312.54   | 94.9392 |



**62: racemic**

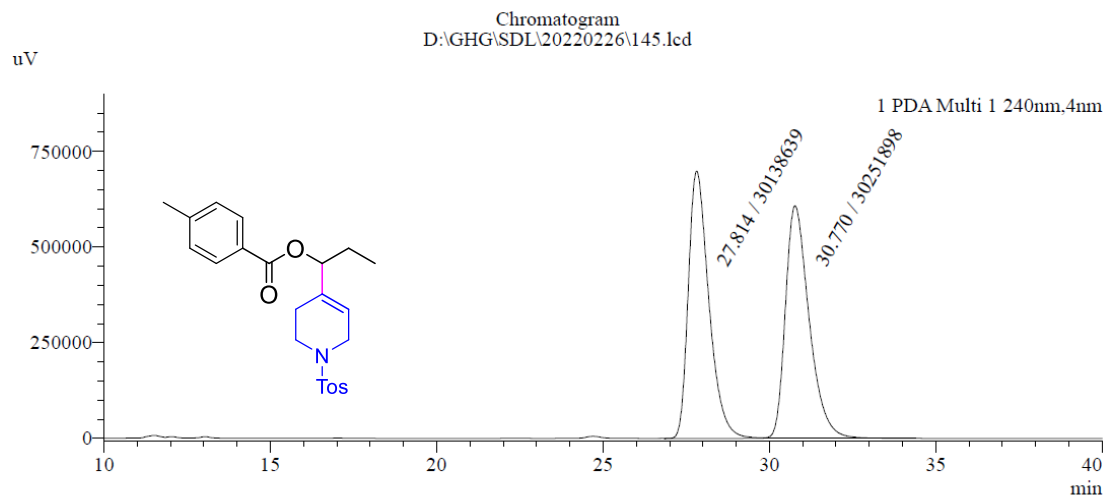

Peak Table

PDA Ch1 240nm

| Peak# | Ret. Time [min] | Width [min] | Area [uV*s] | Height [uV] | Area %  |
|-------|-----------------|-------------|-------------|-------------|---------|
| 1     | 27.814          | 0.6502      | 30138638.73 | 698855.40   | 49.9062 |
| 2     | 30.770          | 0.7484      | 30251898.10 | 608150.44   | 50.0938 |

**62: enantioenriched, 88% ee**

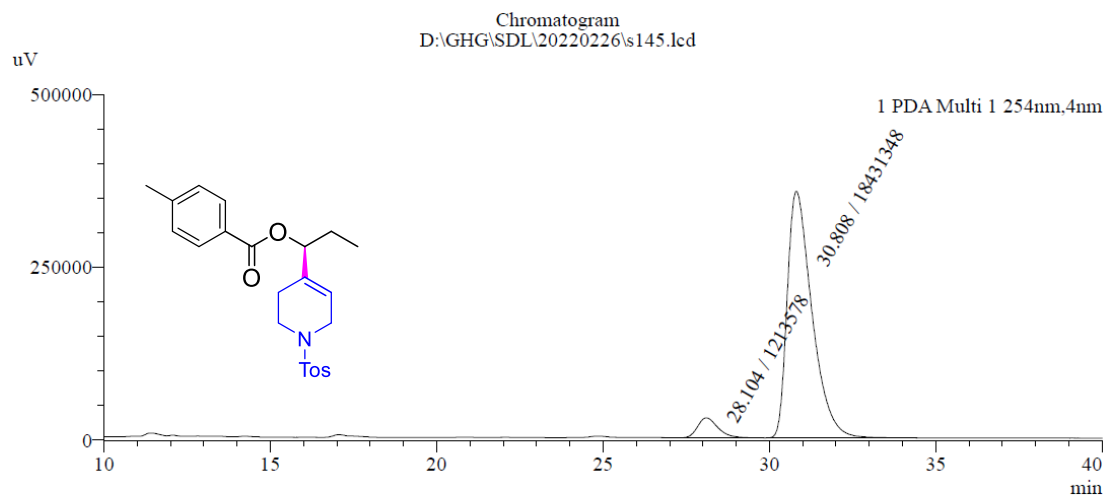

Peak Table

PDA Ch1 254nm

| Peak# | Ret. Time [min] | Width [min] | Area [uV*s] | Height [uV] | Area %  |
|-------|-----------------|-------------|-------------|-------------|---------|
| 1     | 28.104          | 0.6435      | 1213578.20  | 28763.79    | 6.1776  |
| 2     | 30.808          | 0.7813      | 18431347.61 | 356716.22   | 93.8224 |

**63: racemic**

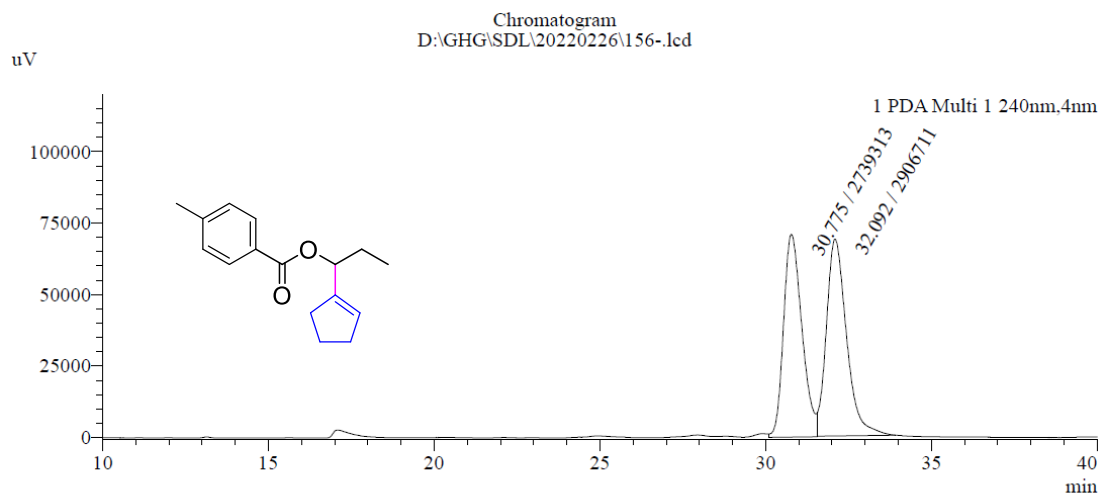

Peak Table

| Peak# | Ret. Time [min] | Width [min] | Area [uV*s] | Height [uV] | Area %  |
|-------|-----------------|-------------|-------------|-------------|---------|
| 1     | 30.775          | 0.5941      | 2739312.87  | 70913.74    | 48.5176 |
| 2     | 32.092          | 0.6324      | 2906711.41  | 68786.95    | 51.4824 |

**63: enantioenriched, 85% ee**

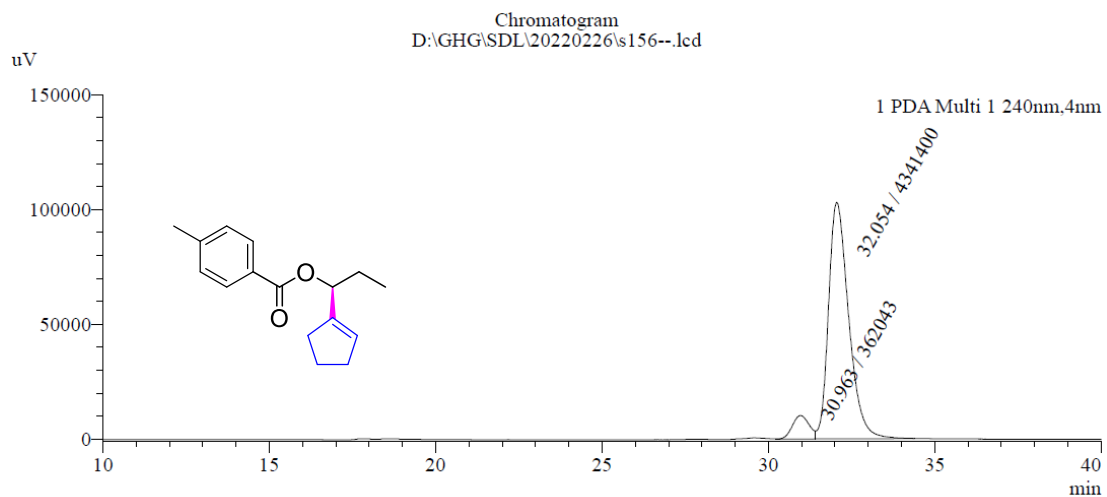

Peak Table

| Peak# | Ret. Time [min] | Width [min] | Area [uV*s] | Height [uV] | Area %  |
|-------|-----------------|-------------|-------------|-------------|---------|
| 1     | 30.963          | 0.5795      | 362042.79   | 10267.38    | 7.6974  |
| 2     | 32.054          | 0.6361      | 4341399.95  | 102968.69   | 92.3026 |

64: racemic

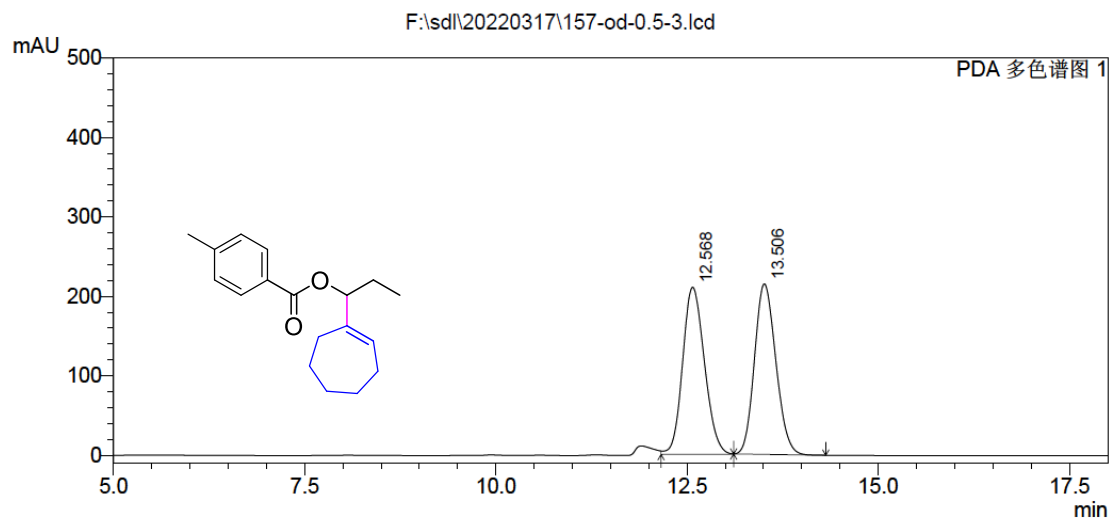

Ch1 240nm 4nm

| Peak# | Ret.Time[min] | Width[min] | Area    | Height[mAU] | Area %  |
|-------|---------------|------------|---------|-------------|---------|
| 1     | 12.568        | 0.308      | 4185939 | 210548      | 50.086  |
| 2     | 13.506        | 0.303      | 4171567 | 214720      | 49.914  |
| 总计    |               |            | 8357506 |             | 100.000 |

64: enantioenriched, 88% ee

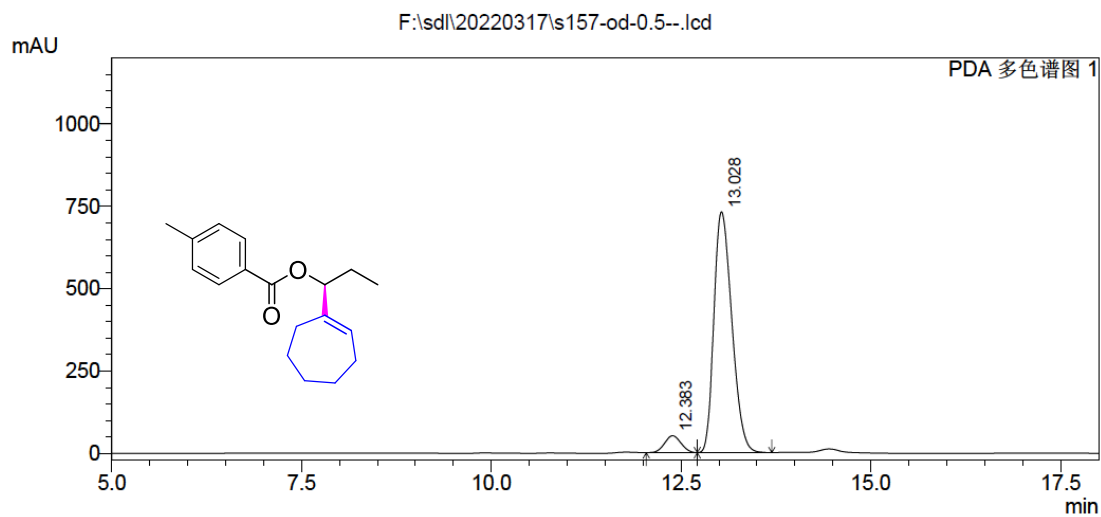

Ch1 240nm 4nm

| Peak# | Ret.Time[min] | Width[min] | Area     | Height[mAU] | Area %  |
|-------|---------------|------------|----------|-------------|---------|
| 1     | 12.383        | 0.238      | 778756   | 51500       | 6.075   |
| 2     | 13.028        | 0.258      | 12040457 | 731451      | 93.925  |
| 总计    |               |            | 12819213 |             | 100.000 |

**65: racemic**

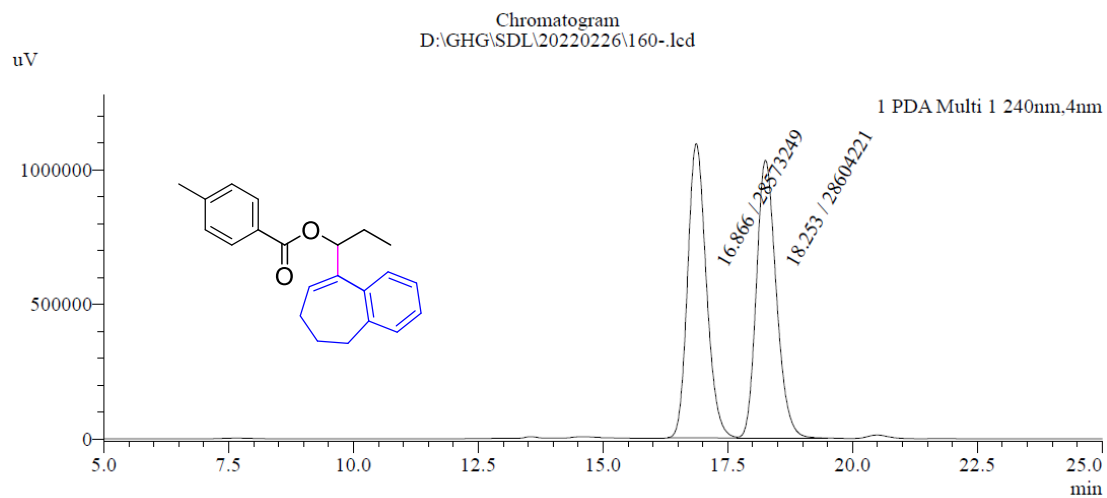

Peak Table

| Peak# | Ret. Time [min] | Width [min] | Area [uV*s] | Height [uV] | Area %  |
|-------|-----------------|-------------|-------------|-------------|---------|
| 1     | 16.866          | 0.3998      | 28573248.80 | 1094880.54  | 49.9729 |
| 2     | 18.253          | 0.4237      | 28604220.54 | 1032835.08  | 50.0271 |

**65: enantioenriched, 89% ee**

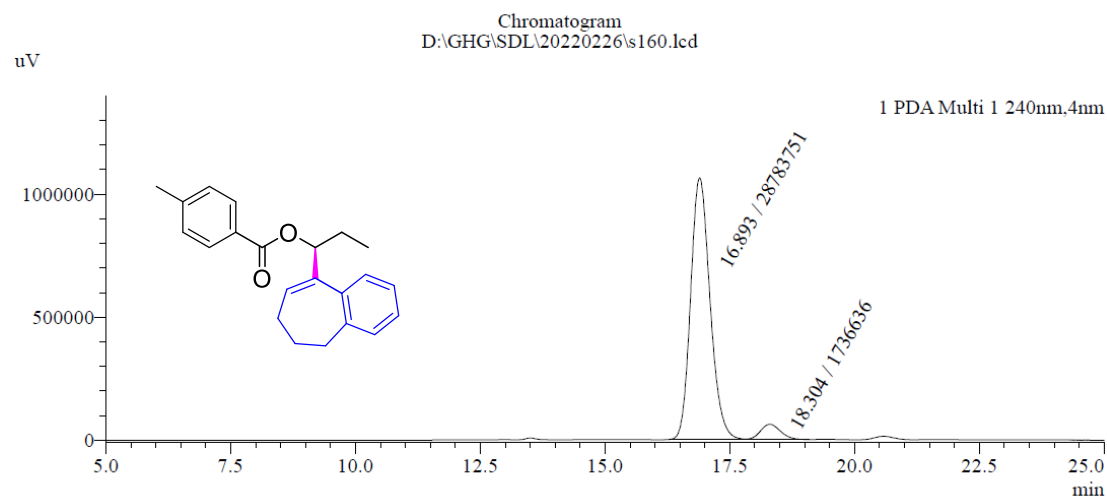

Peak Table

| Peak# | Ret. Time [min] | Width [min] | Area [uV*s] | Height [uV] | Area %  |
|-------|-----------------|-------------|-------------|-------------|---------|
| 1     | 16.893          | 0.4142      | 28783750.73 | 1064273.04  | 94.3099 |
| 2     | 18.304          | 0.4318      | 1736636.03  | 62309.54    | 5.6901  |

**66: racemic**

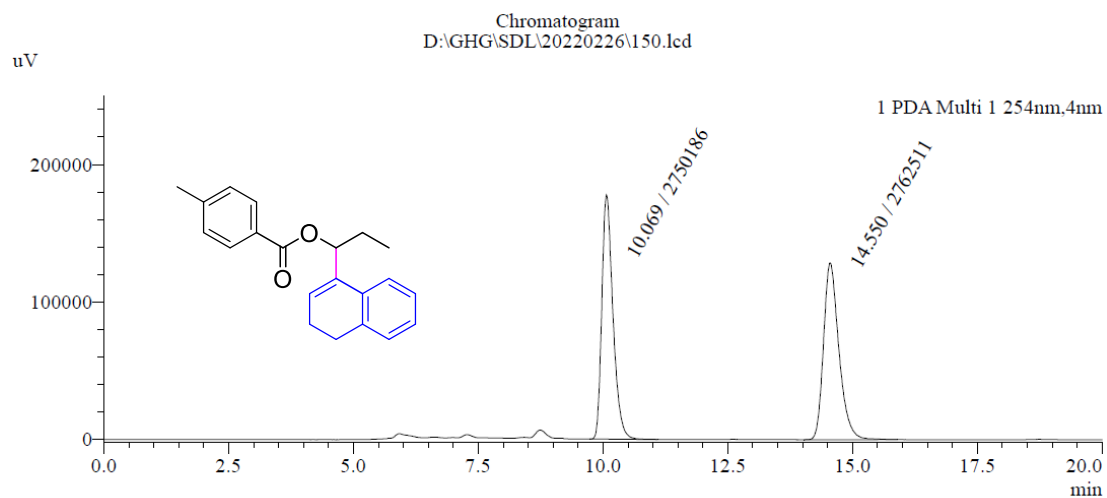

Peak Table

PDA Ch1 254nm

| Peak# | Ret. Time [min] | Width [min] | Area [uV*s] | Height [uV] | Area %  |
|-------|-----------------|-------------|-------------|-------------|---------|
| 1     | 10.069          | 0.2336      | 2750185.66  | 177521.79   | 49.8882 |
| 2     | 14.550          | 0.3212      | 2762510.57  | 128515.31   | 50.1118 |

**66: enantioenriched, 91% ee**

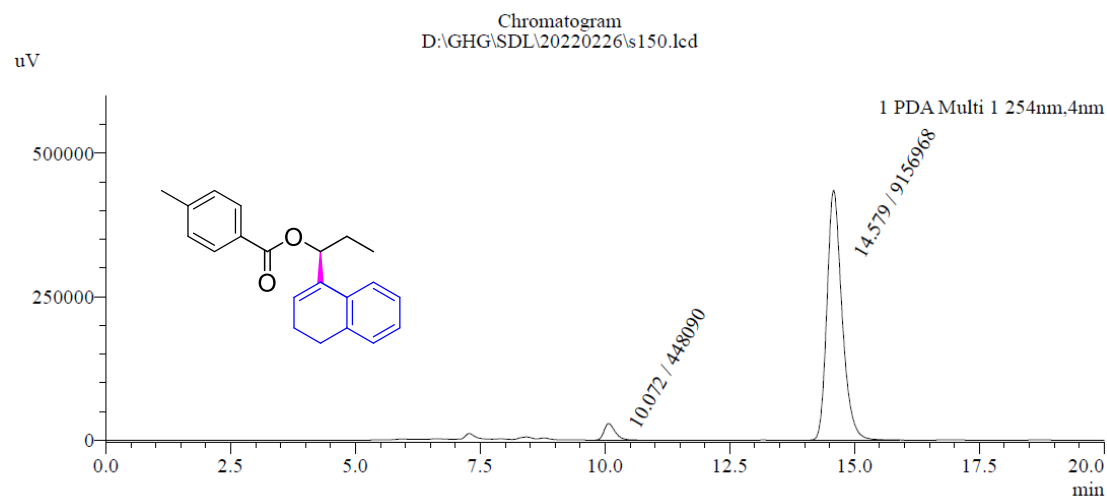

Peak Table

PDA Ch1 254nm

| Peak# | Ret. Time [min] | Width [min] | Area [uV*s] | Height [uV] | Area %  |
|-------|-----------------|-------------|-------------|-------------|---------|
| 1     | 10.072          | 0.2328      | 448089.74   | 28979.25    | 4.6651  |
| 2     | 14.579          | 0.3139      | 9156968.01  | 435506.65   | 95.3349 |

**67: racemic**

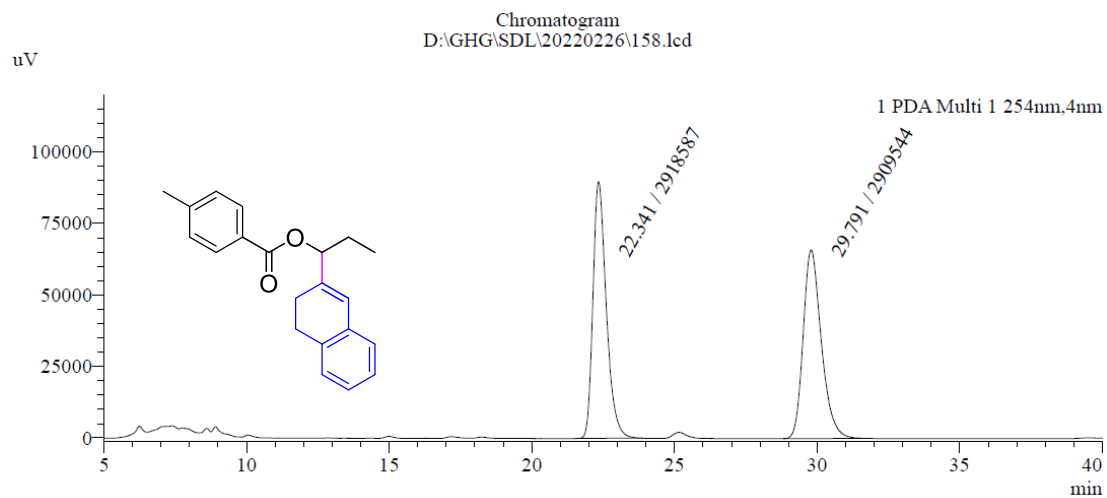

Peak Table

| Peak# | Ret. Time [min] | Width [min] | Area [uV*s] | Height [uV] | Area %  |
|-------|-----------------|-------------|-------------|-------------|---------|
| 1     | 22.341          | 0.4858      | 2918586.55  | 89761.92    | 50.0776 |
| 2     | 29.791          | 0.6618      | 2909544.49  | 65993.79    | 49.9224 |

**67: enantioenriched, 88% ee**

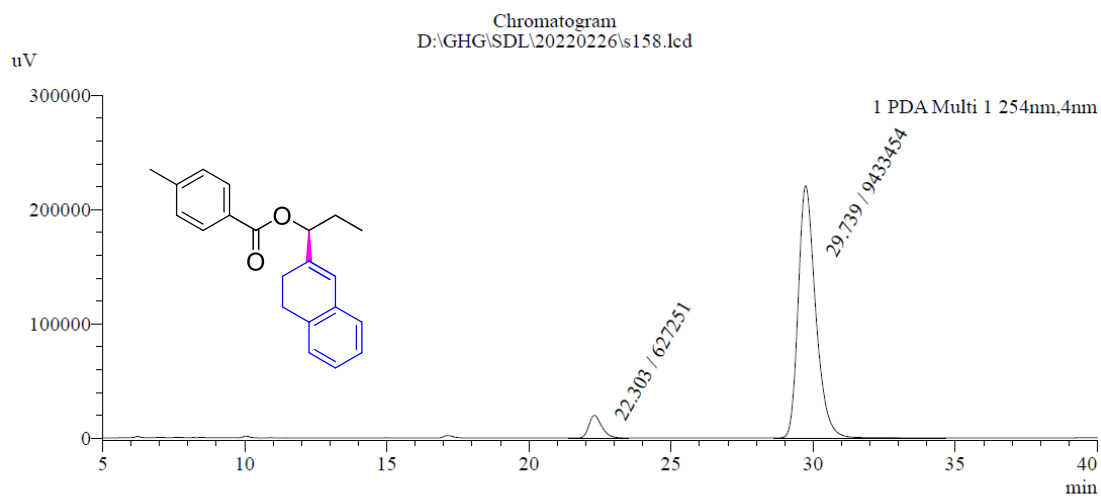

Peak Table

| Peak# | Ret. Time [min] | Width [min] | Area [uV*s] | Height [uV] | Area %  |
|-------|-----------------|-------------|-------------|-------------|---------|
| 1     | 22.303          | 0.4733      | 627251.09   | 19910.44    | 6.2347  |
| 2     | 29.739          | 0.6351      | 9433453.77  | 220584.48   | 93.7653 |

**68: racemic**

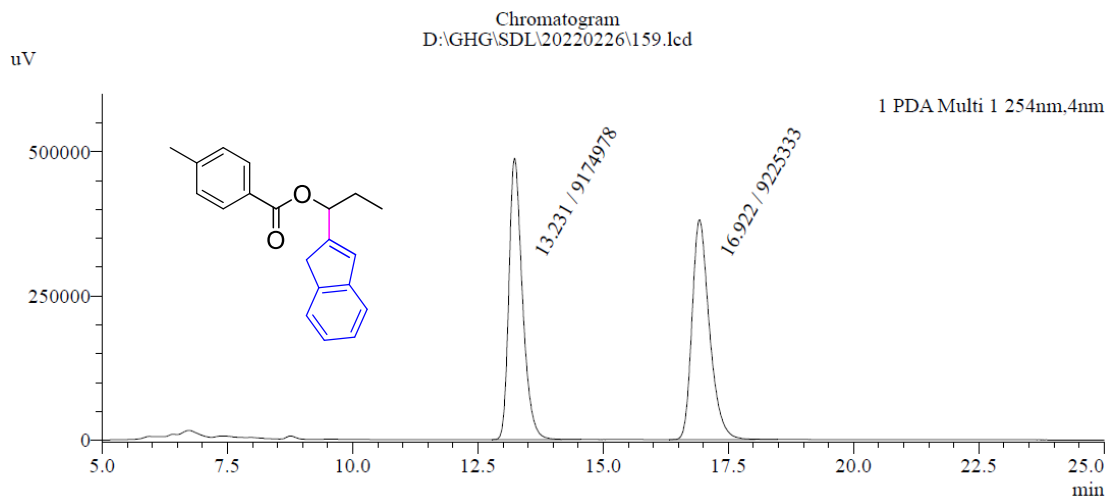

Peak Table

| Peak# | Ret. Time [min] | Width [min] | Area [uV*s] | Height [uV] | Area %  |
|-------|-----------------|-------------|-------------|-------------|---------|
| 1     | 13.231          | 0.2811      | 9174978.44  | 487707.02   | 49.8632 |
| 2     | 16.922          | 0.3620      | 9225332.84  | 380916.82   | 50.1368 |

**68: enantioenriched, 85% ee**

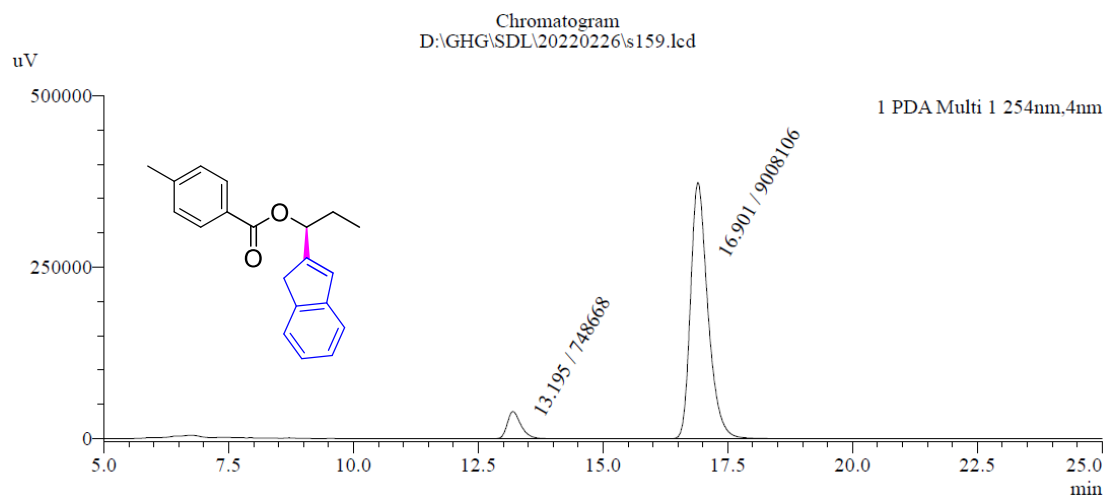

Peak Table

| Peak# | Ret. Time [min] | Width [min] | Area [uV*s] | Height [uV] | Area %  |
|-------|-----------------|-------------|-------------|-------------|---------|
| 1     | 13.195          | 0.2840      | 748668.06   | 39530.39    | 7.6733  |
| 2     | 16.901          | 0.3608      | 9008106.06  | 372872.33   | 92.3267 |

## IV. NMR Data

### 1, <sup>1</sup>H-NMR (600 MHz, CDCl<sub>3</sub>)

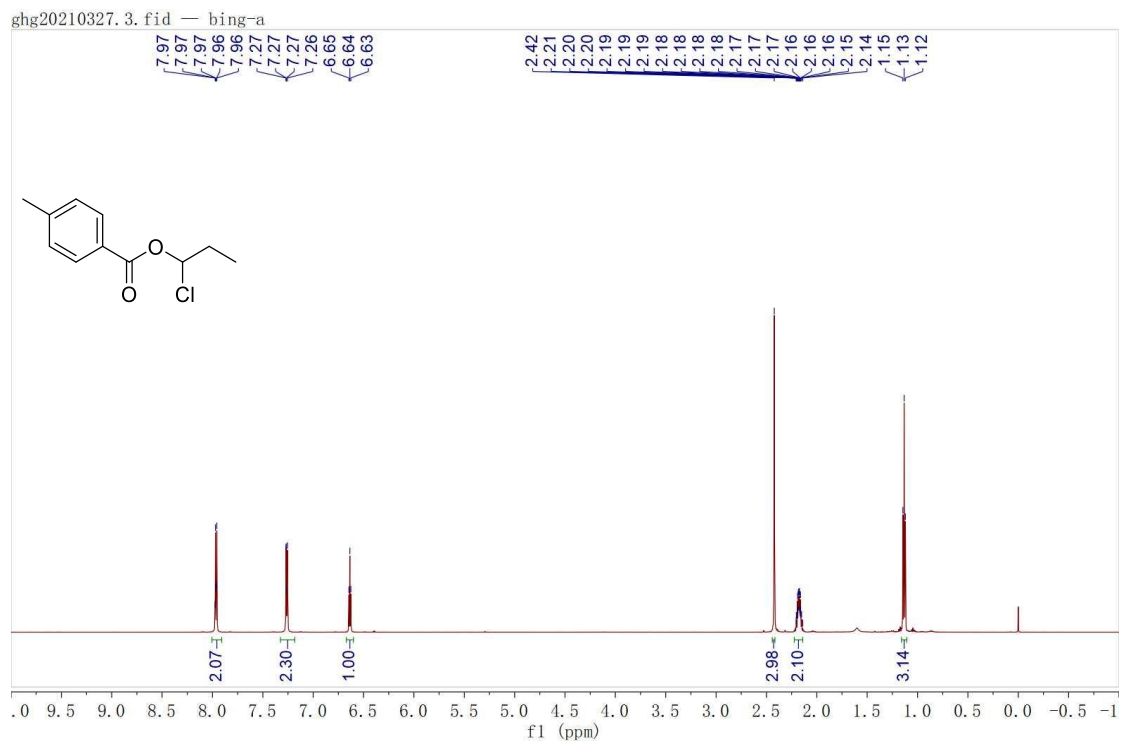

### 1, <sup>13</sup>C NMR (151 MHz, CDCl<sub>3</sub>)

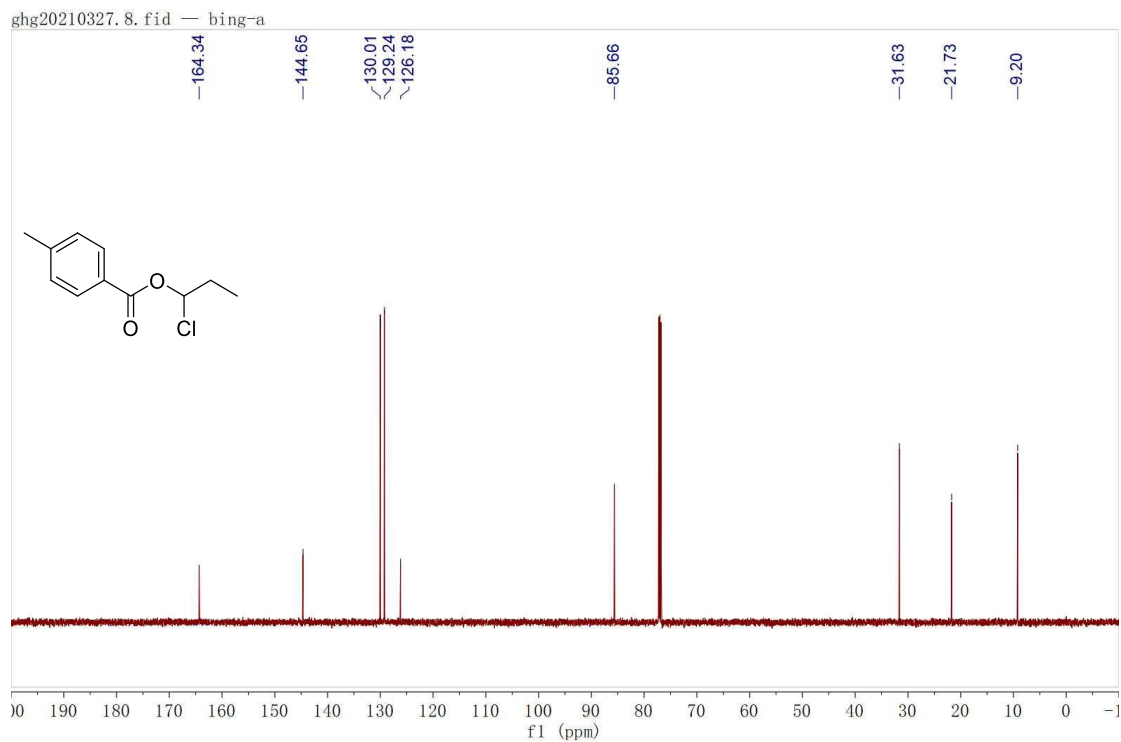



SM1, <sup>1</sup>H-NMR (600 MHz, CDCl<sub>3</sub>)

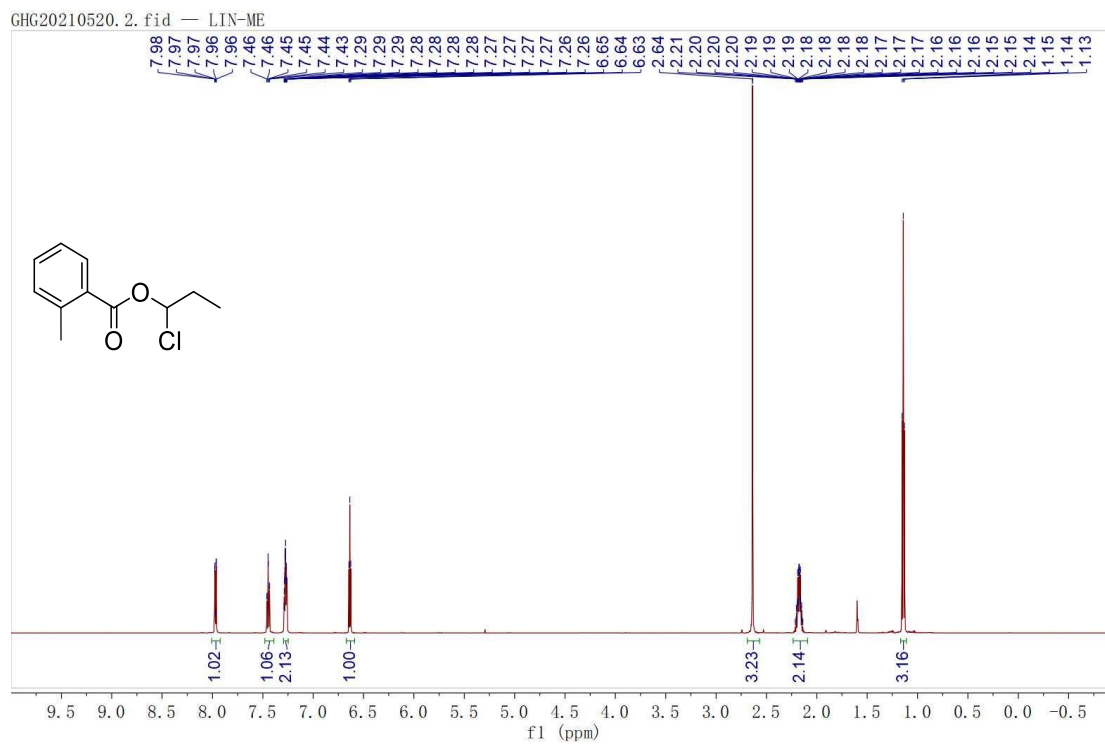

SM1, <sup>13</sup>C NMR (151 MHz, CDCl<sub>3</sub>)

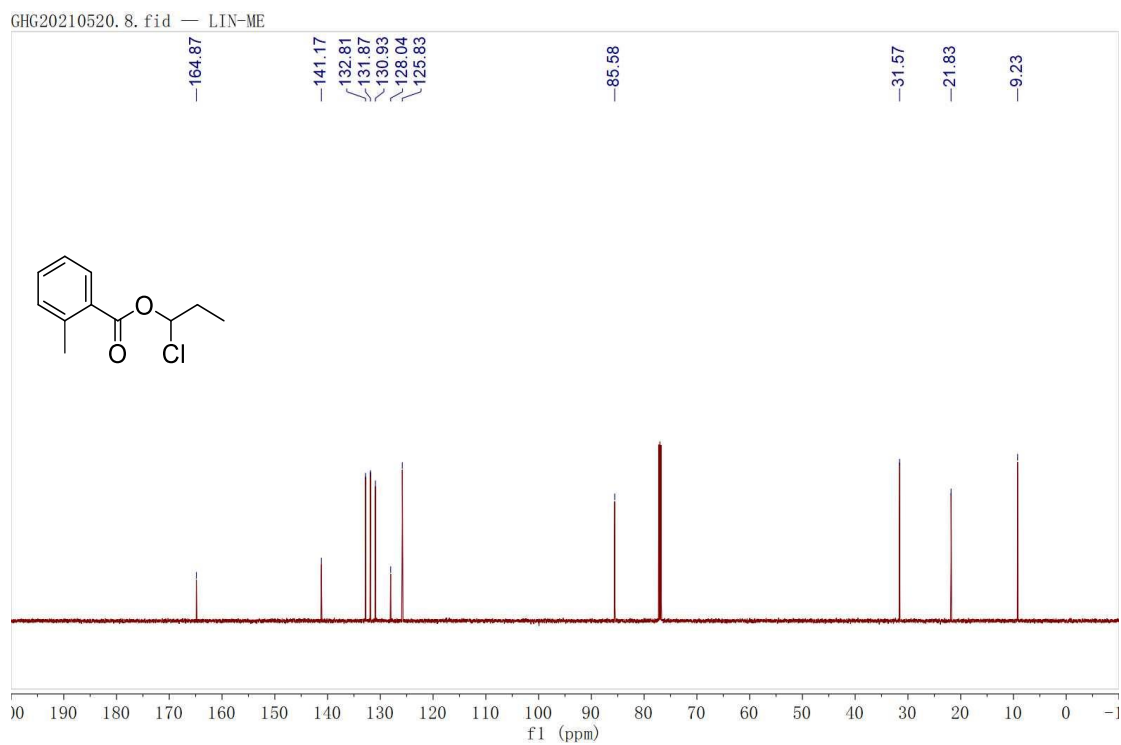

SM2, <sup>1</sup>H-NMR (600 MHz, CDCl<sub>3</sub>)

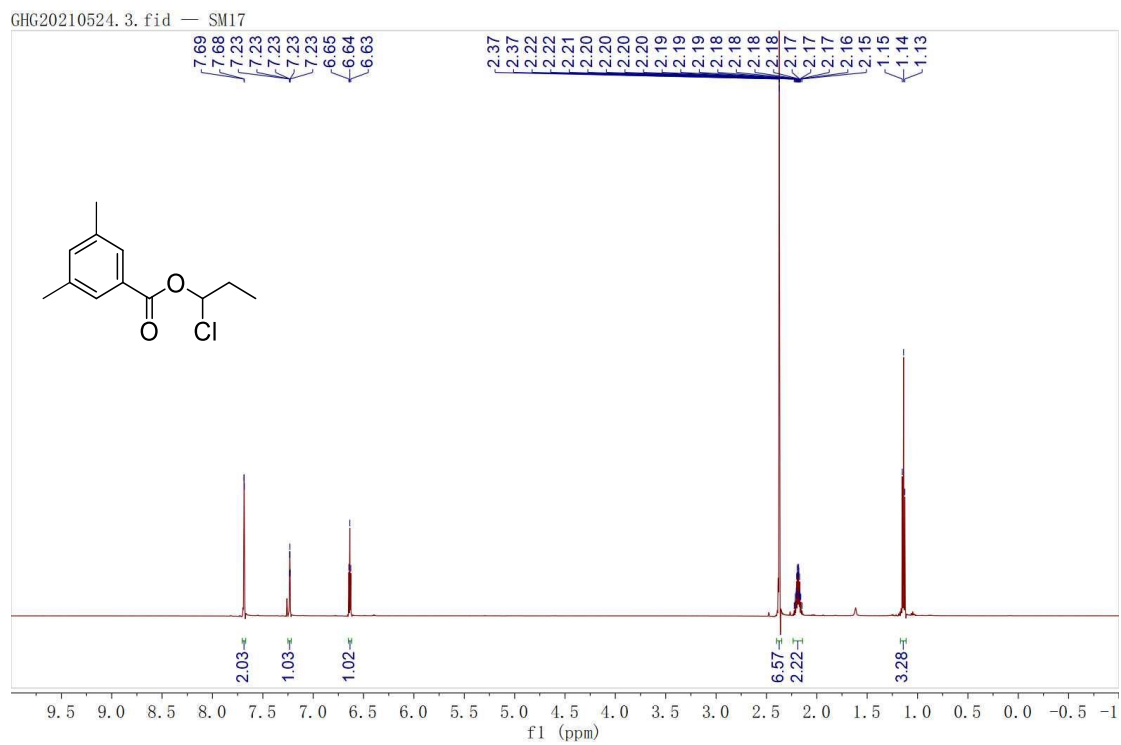

SM2, <sup>13</sup>C NMR (151 MHz, CDCl<sub>3</sub>)

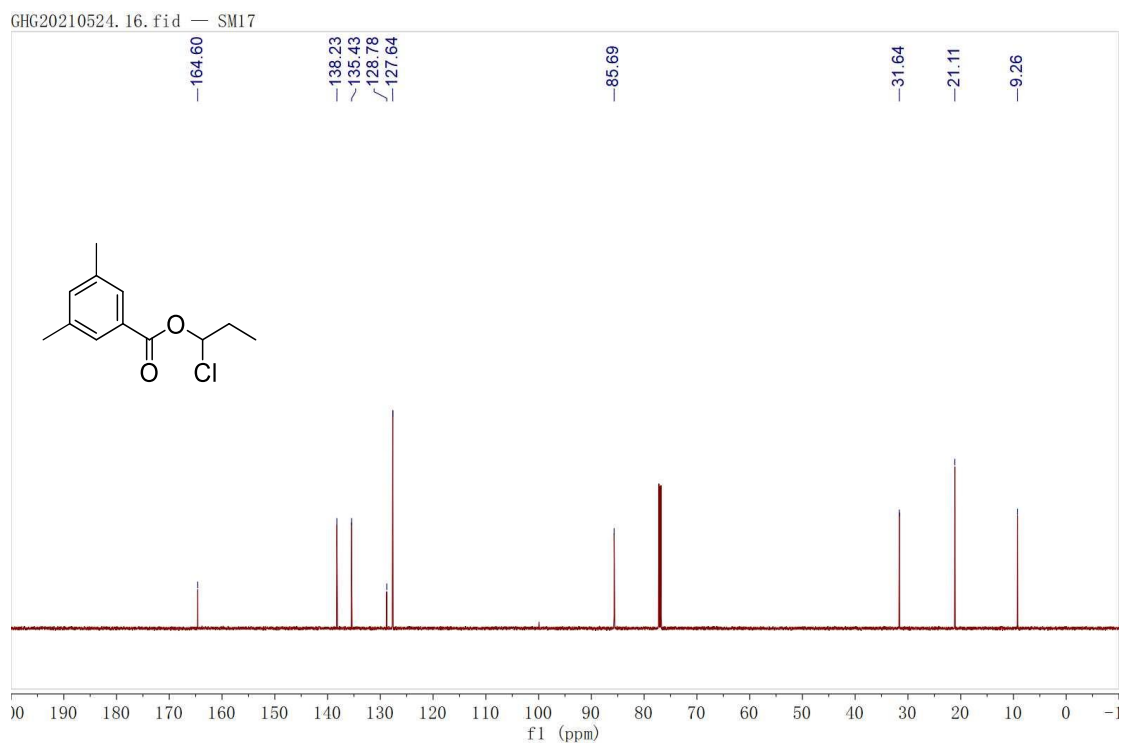

SM3, <sup>1</sup>H-NMR (600 MHz, CDCl<sub>3</sub>)

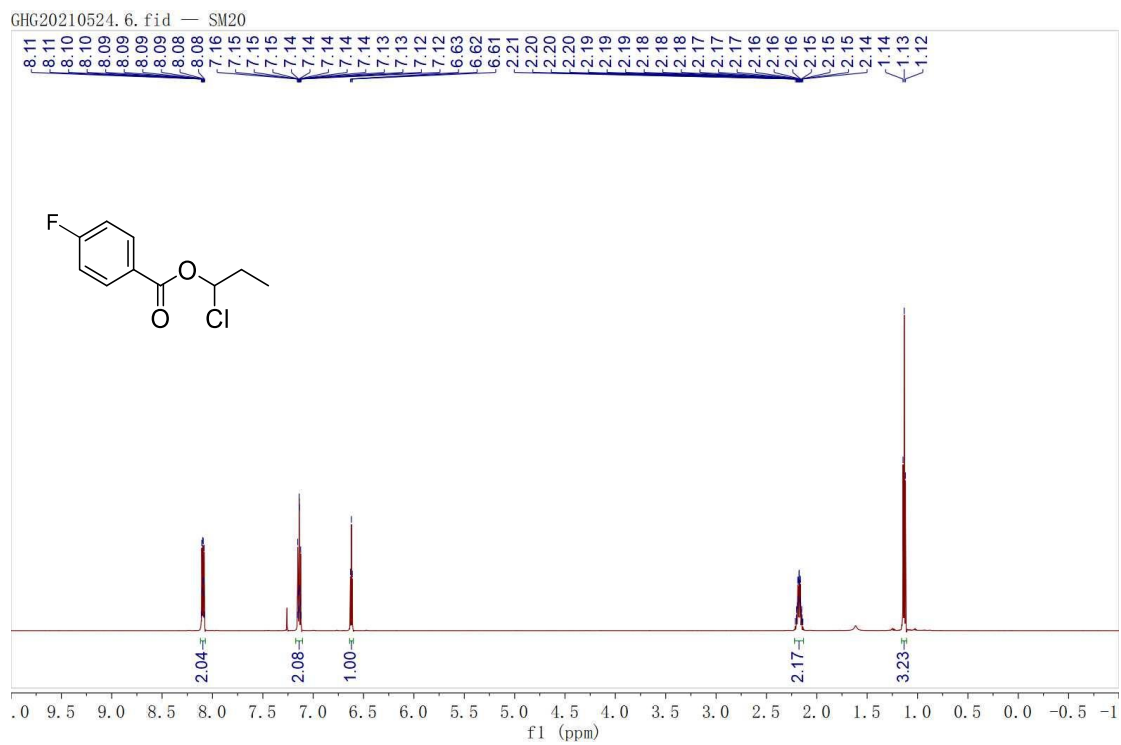

SM3, <sup>13</sup>C NMR (151 MHz, CDCl<sub>3</sub>)

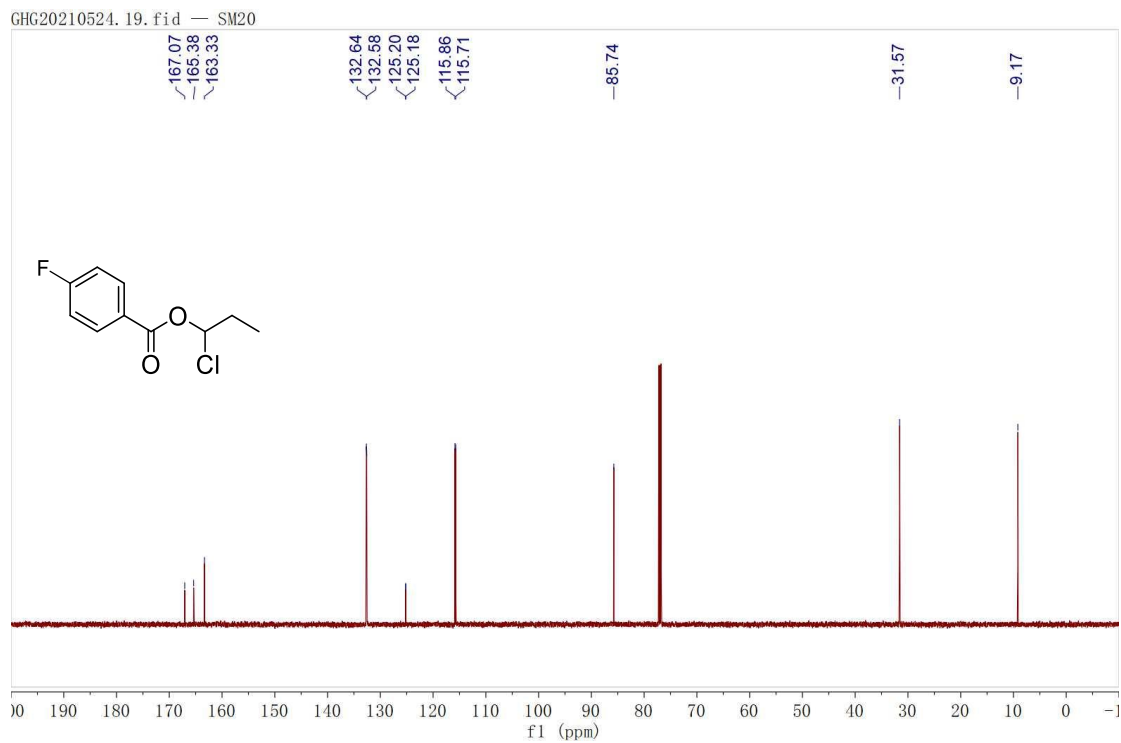

SM3, <sup>19</sup>F NMR (565 MHz, CDCl<sub>3</sub>)

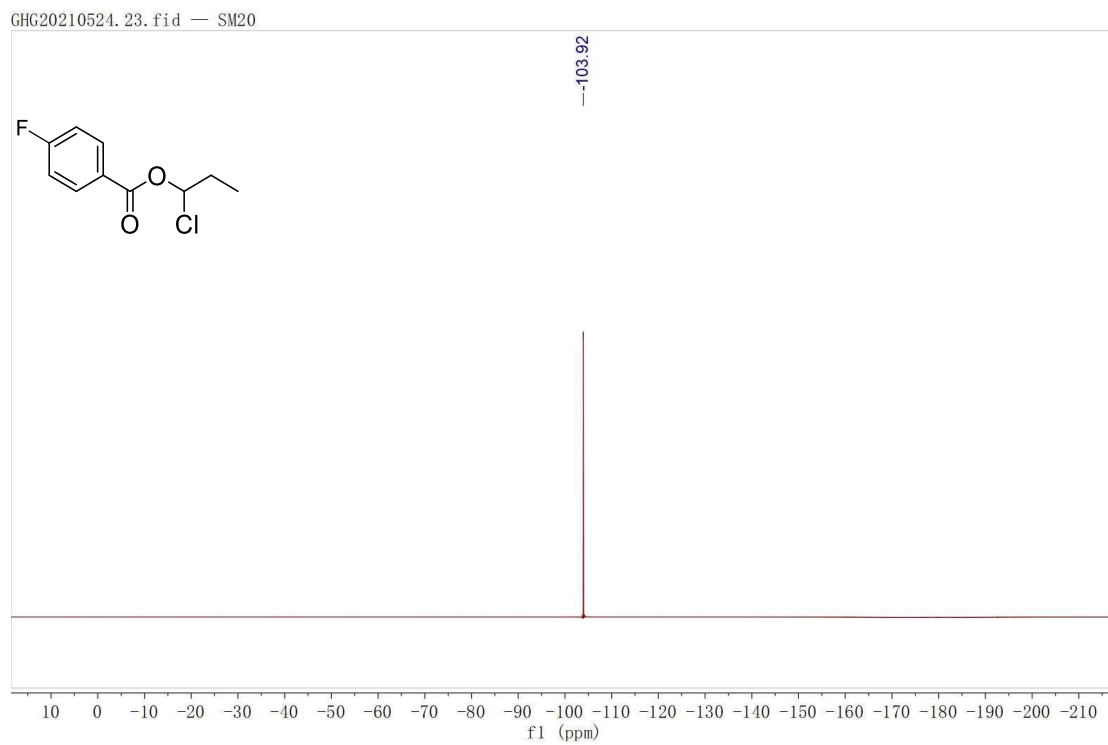

SM4, <sup>1</sup>H-NMR (600 MHz, CDCl<sub>3</sub>)

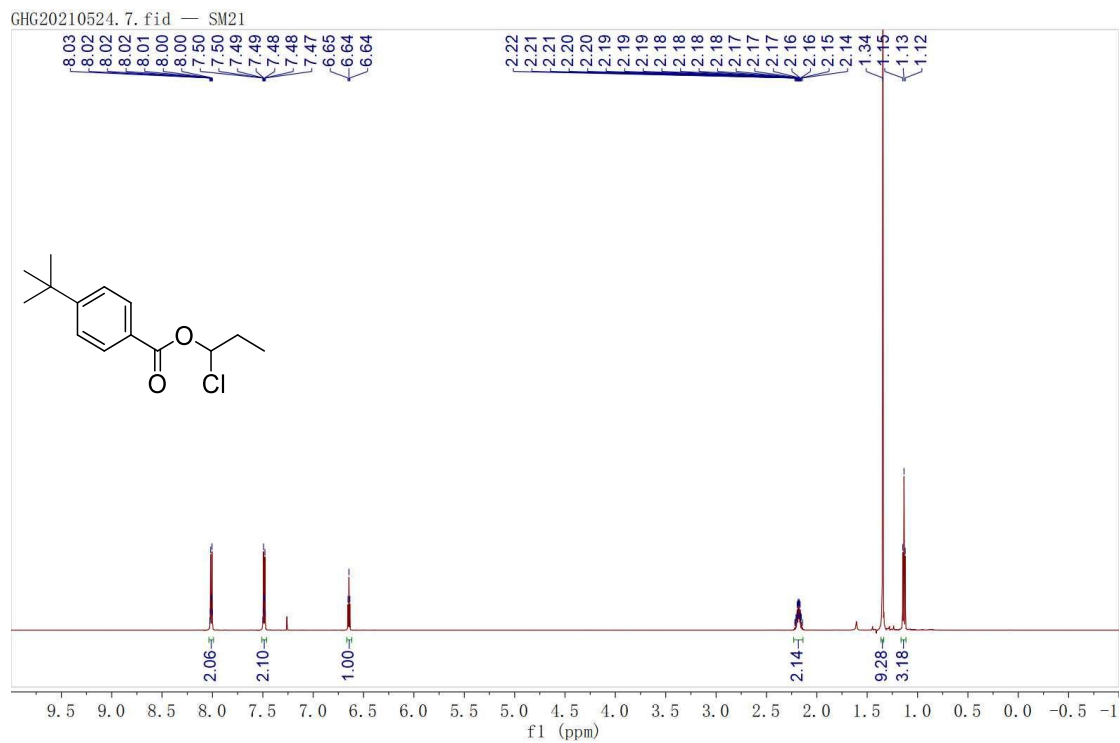

SM4, <sup>13</sup>C NMR (151 MHz, CDCl<sub>3</sub>)

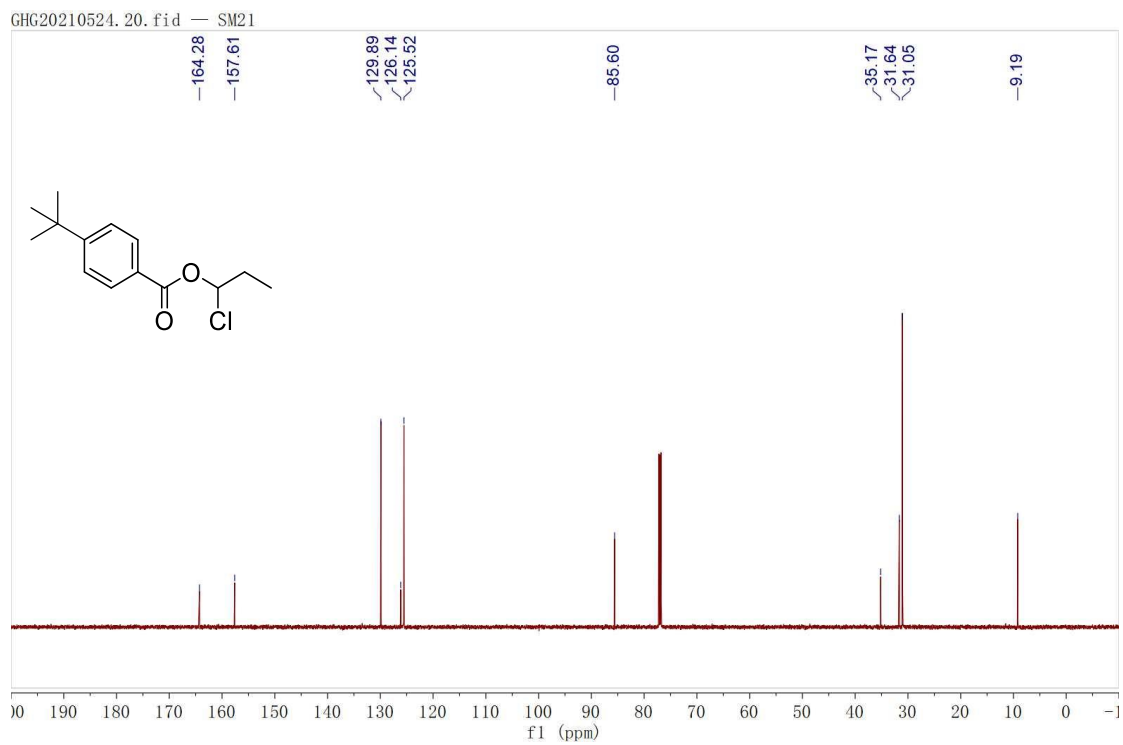

SM5, <sup>1</sup>H-NMR (600 MHz, CDCl<sub>3</sub>)

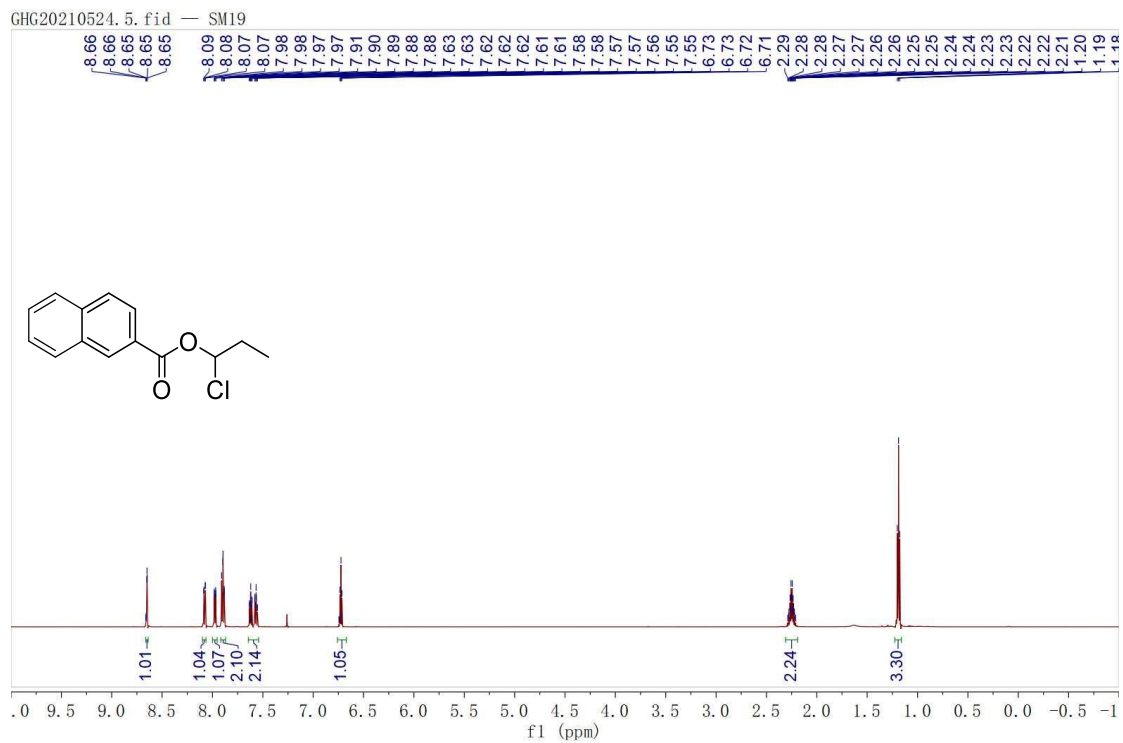

SM5, <sup>13</sup>C NMR (151 MHz, CDCl<sub>3</sub>)

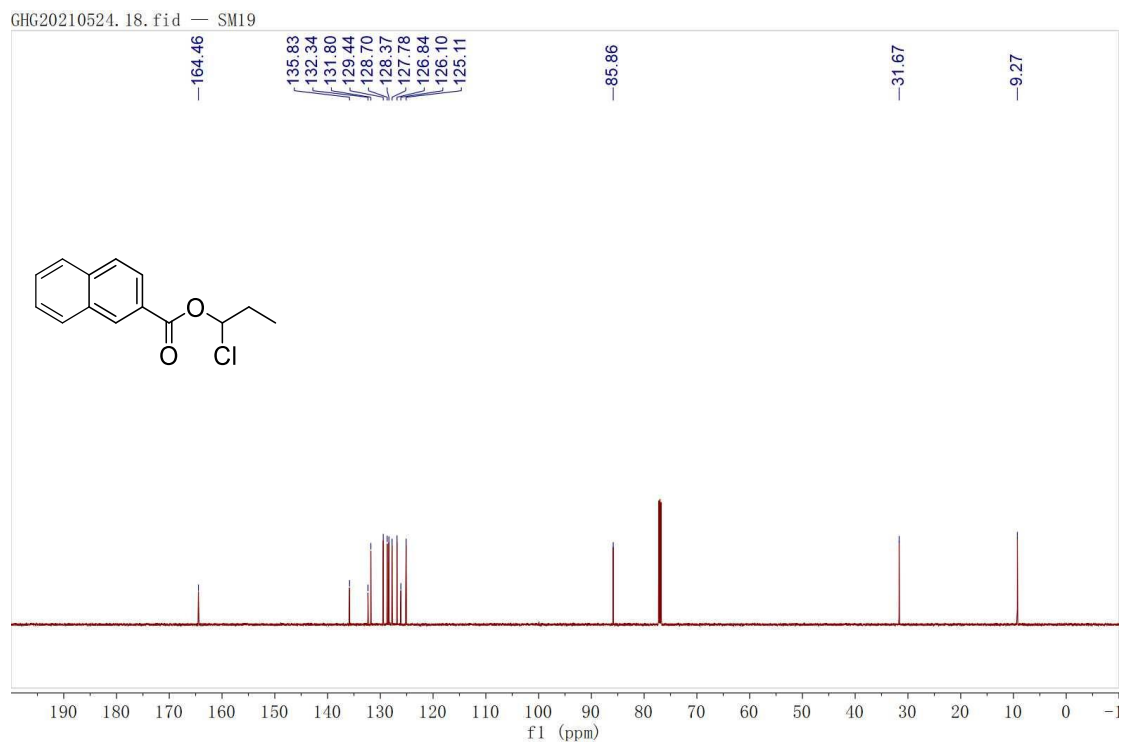

SM6, <sup>1</sup>H-NMR (600 MHz, CDCl<sub>3</sub>)

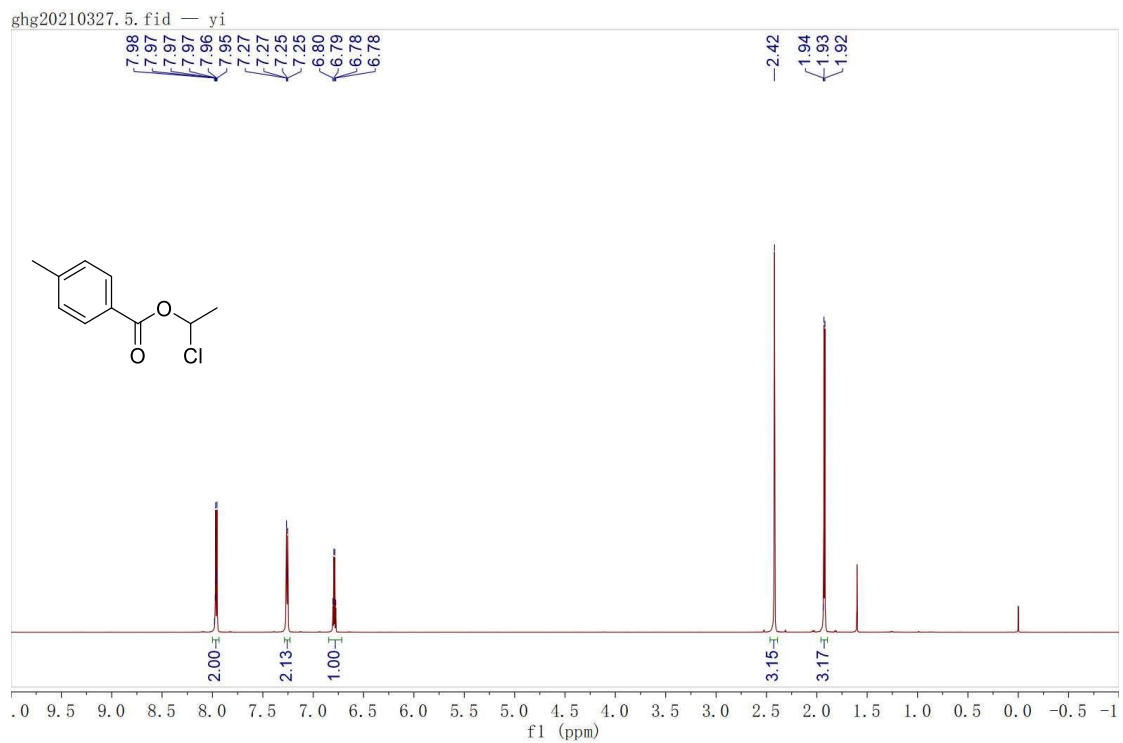

SM6, <sup>13</sup>C NMR (151 MHz, CDCl<sub>3</sub>)

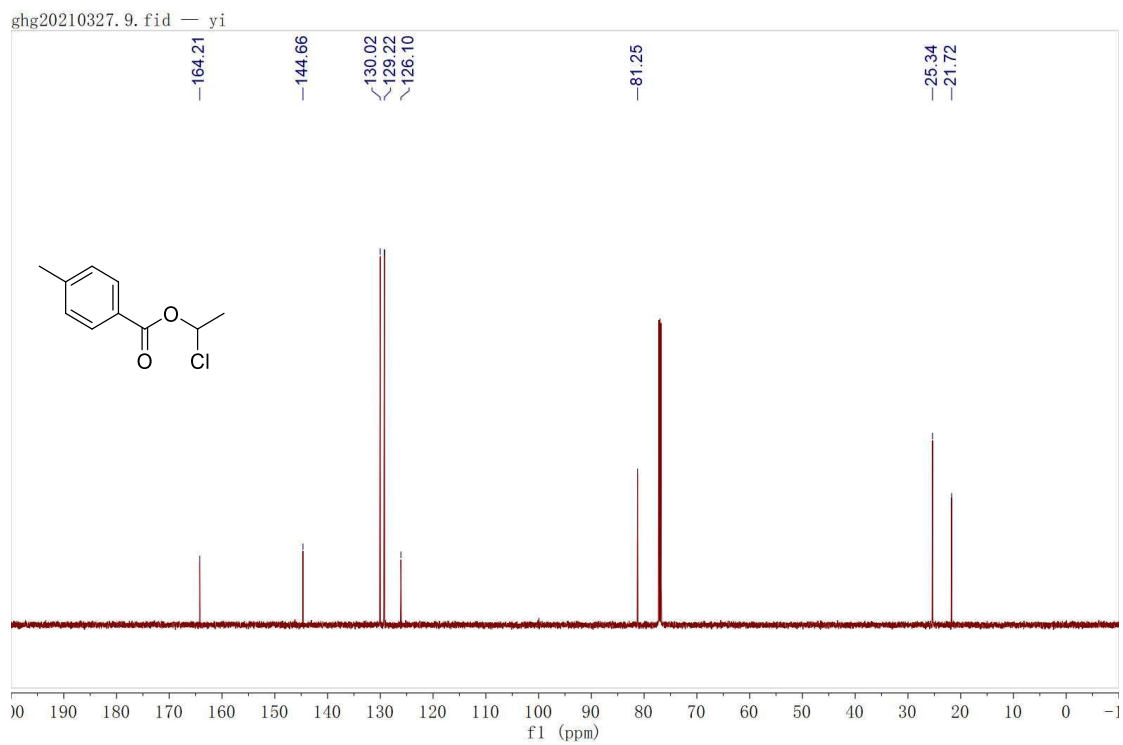

SM7, <sup>1</sup>H-NMR (600 MHz, CDCl<sub>3</sub>)

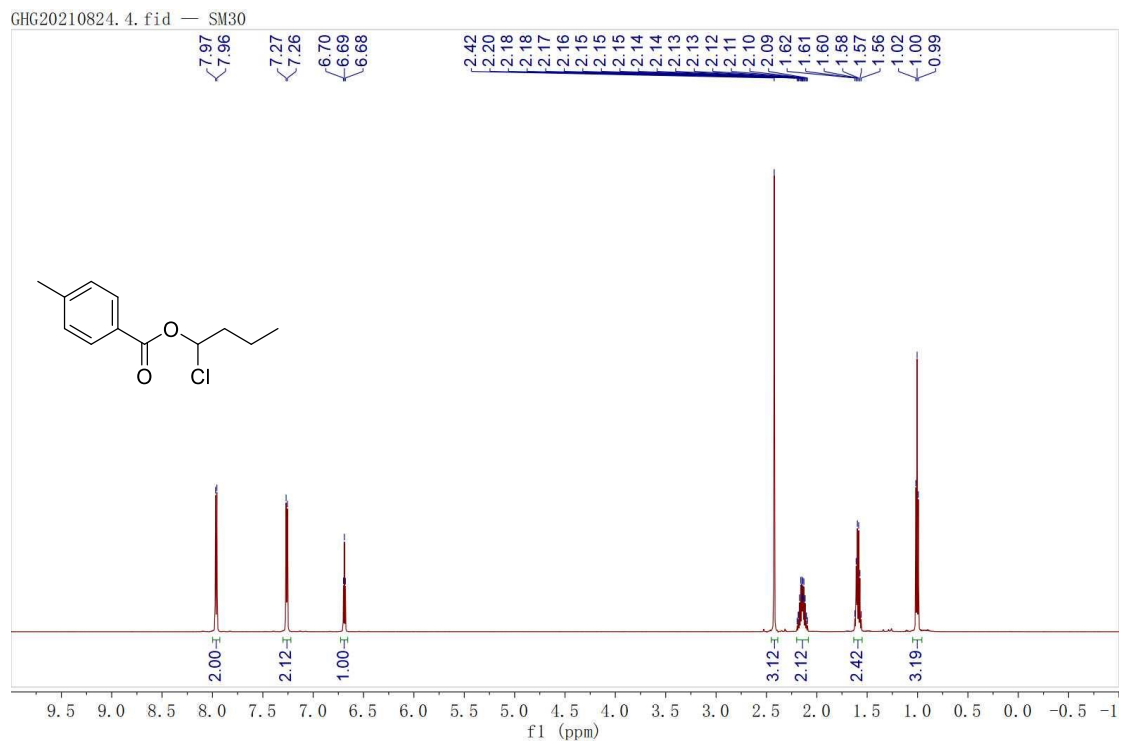

SM7, <sup>13</sup>C NMR (151 MHz, CDCl<sub>3</sub>)

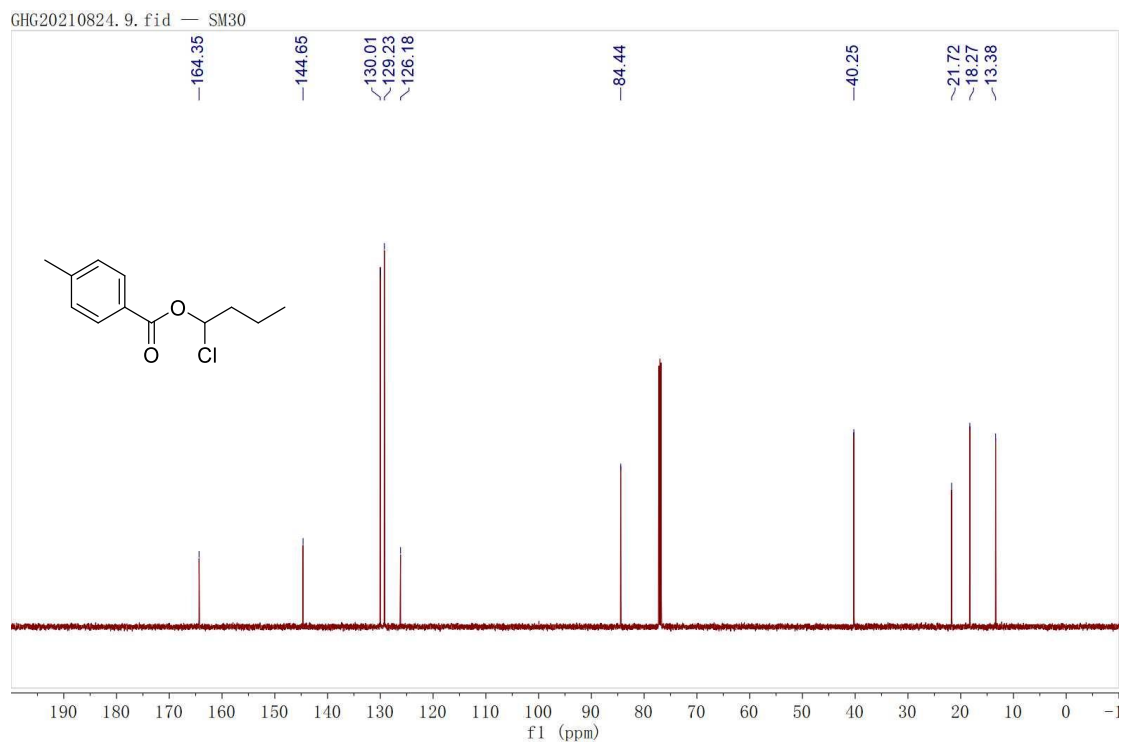

SM8, <sup>1</sup>H-NMR (600 MHz, CDCl<sub>3</sub>)

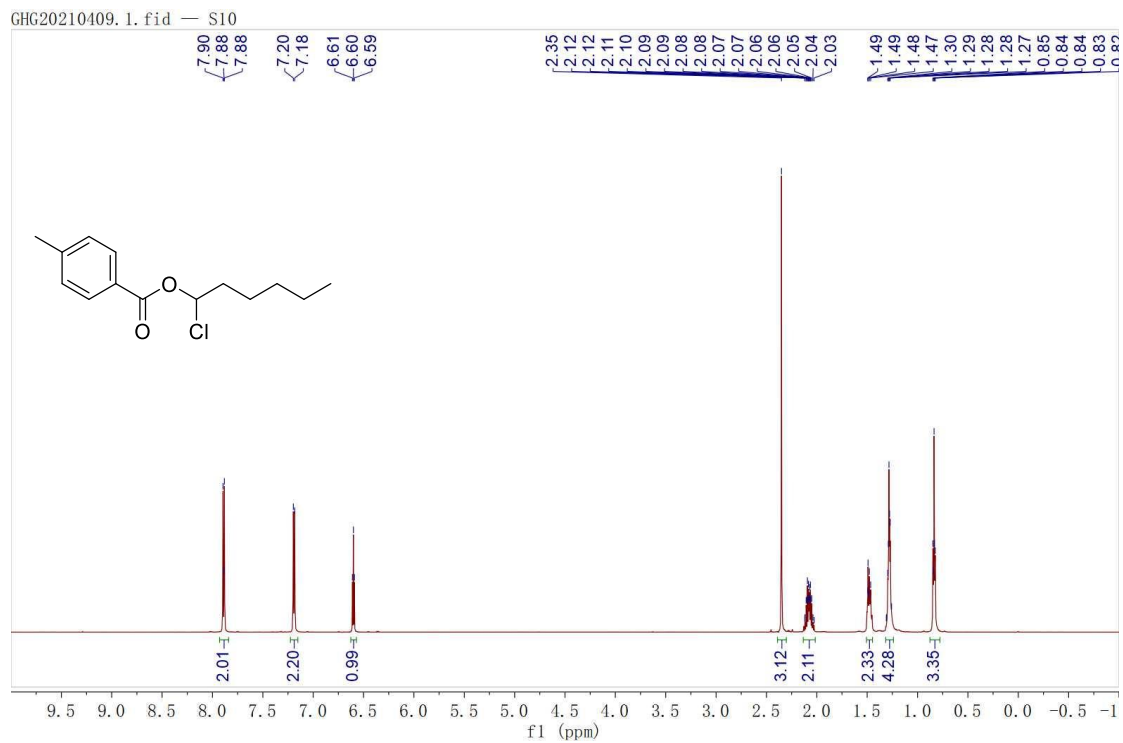



SM8, <sup>13</sup>C NMR (151 MHz, CDCl<sub>3</sub>)

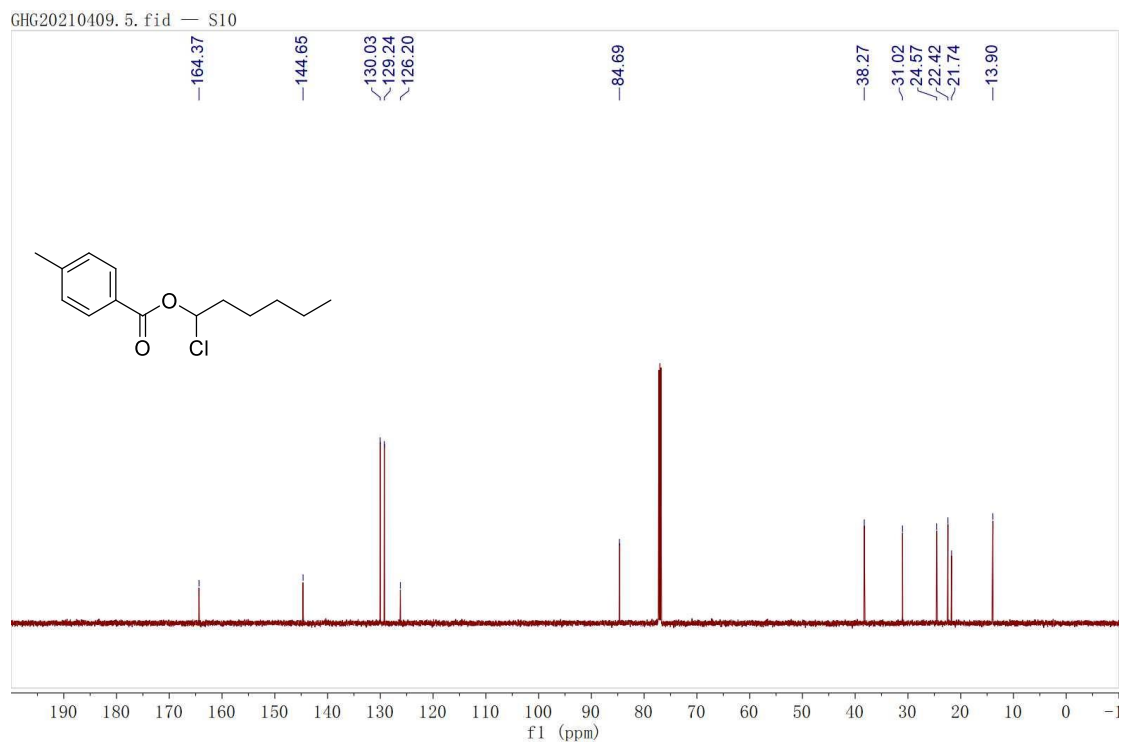

SM9, <sup>1</sup>H-NMR (600 MHz, CDCl<sub>3</sub>)

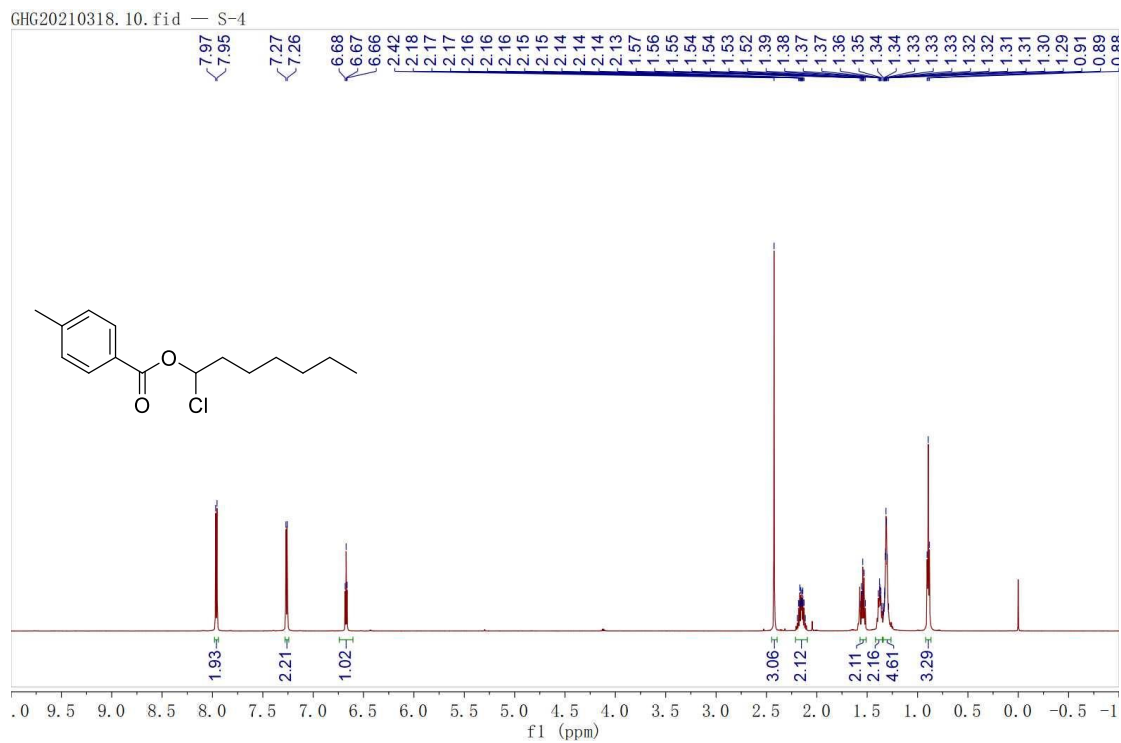

SM9, <sup>13</sup>C NMR (151 MHz, CDCl<sub>3</sub>)

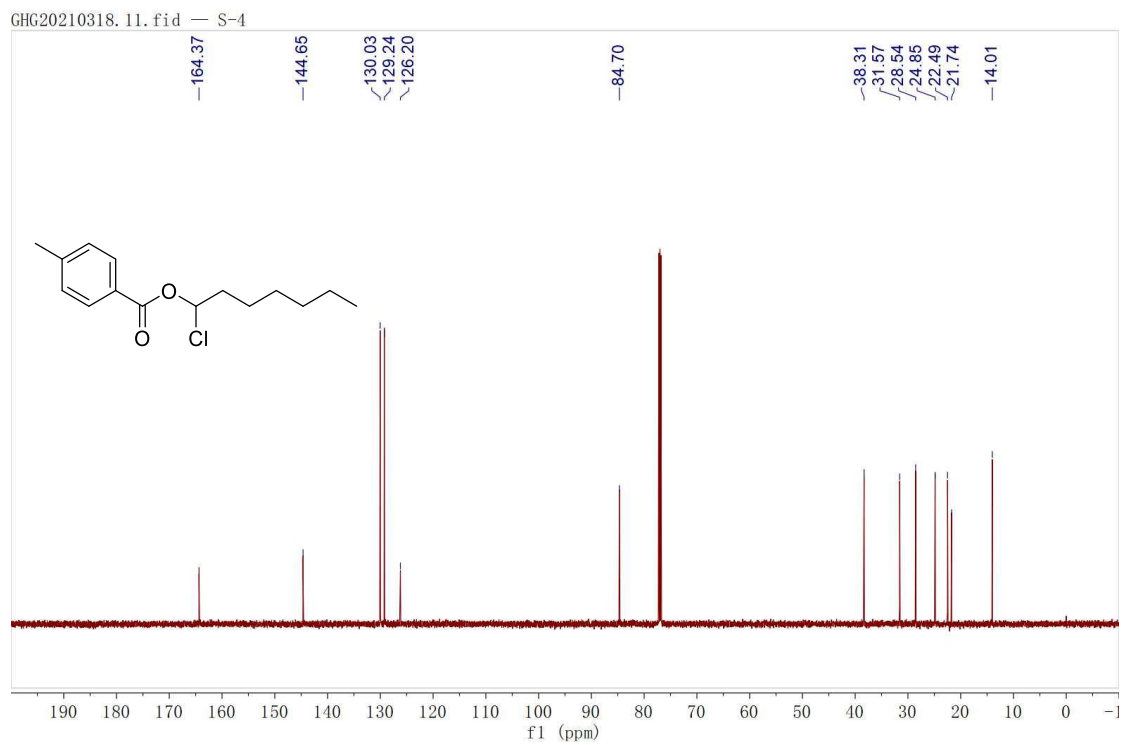

SM10, <sup>1</sup>H-NMR (600 MHz, CDCl<sub>3</sub>)

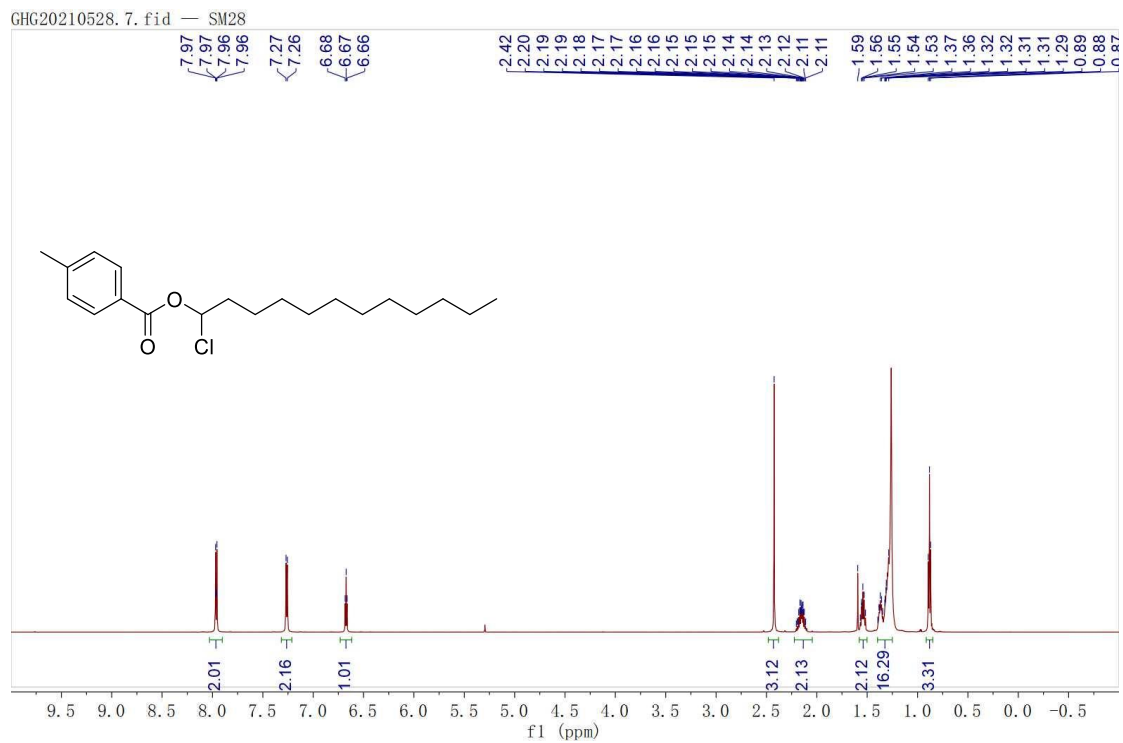

SM10, <sup>13</sup>C NMR (151 MHz, CDCl<sub>3</sub>)

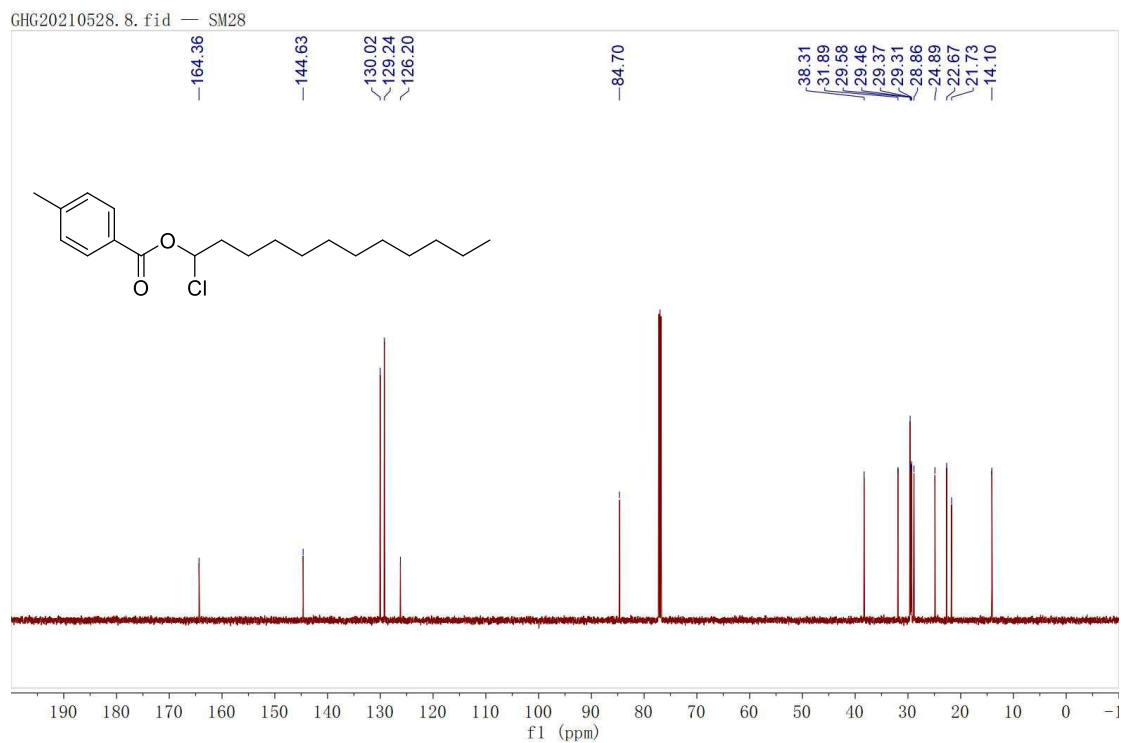

SM11, <sup>1</sup>H-NMR (600 MHz, CDCl<sub>3</sub>)

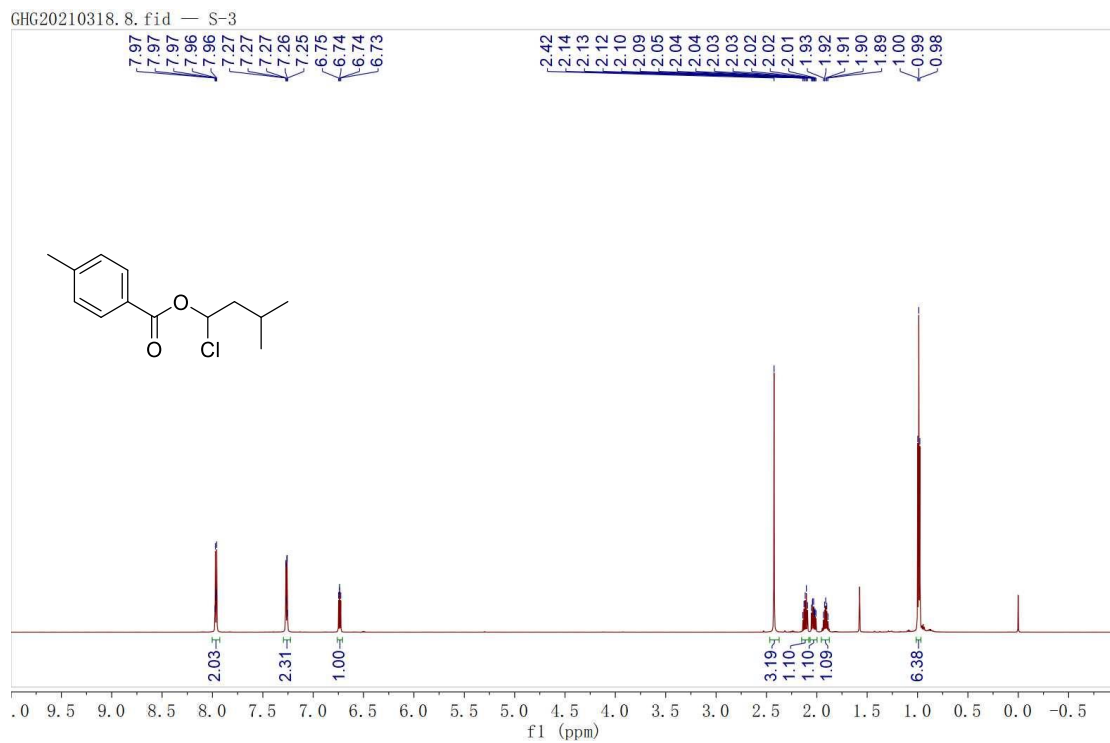

### SM11, <sup>13</sup>C NMR (151 MHz, CDCl<sub>3</sub>)

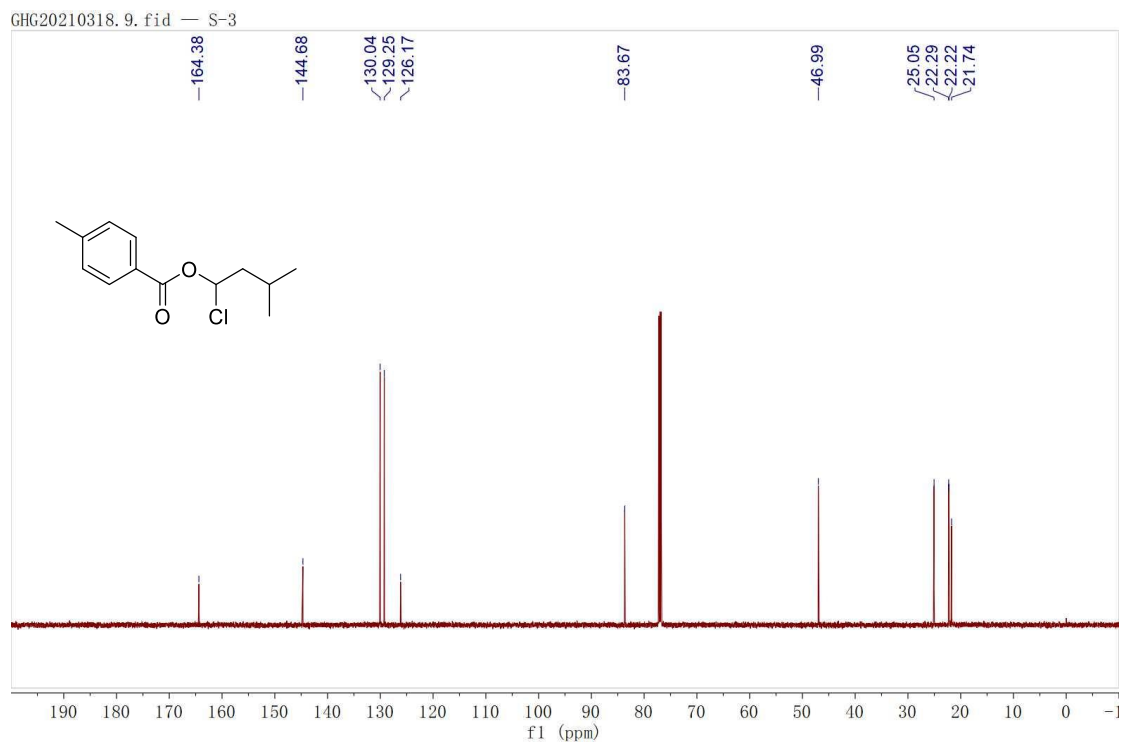

### SM12, <sup>1</sup>H-NMR (600 MHz, CDCl<sub>3</sub>)

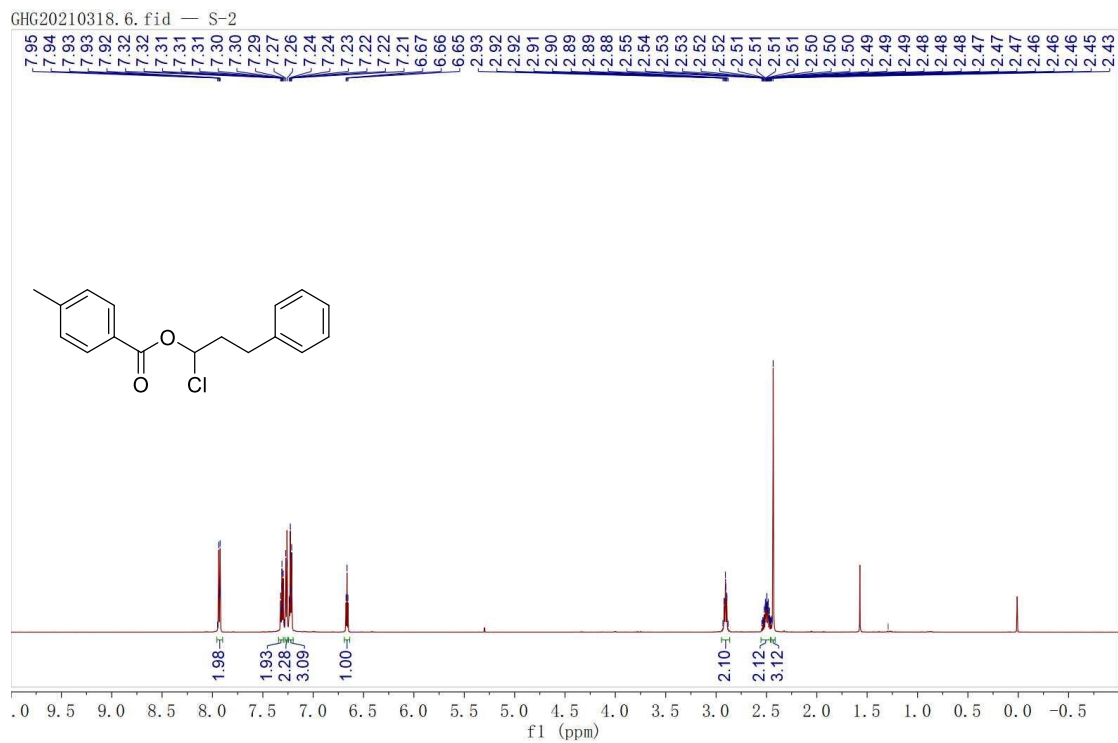

SM12, <sup>13</sup>C NMR (151 MHz, CDCl<sub>3</sub>)

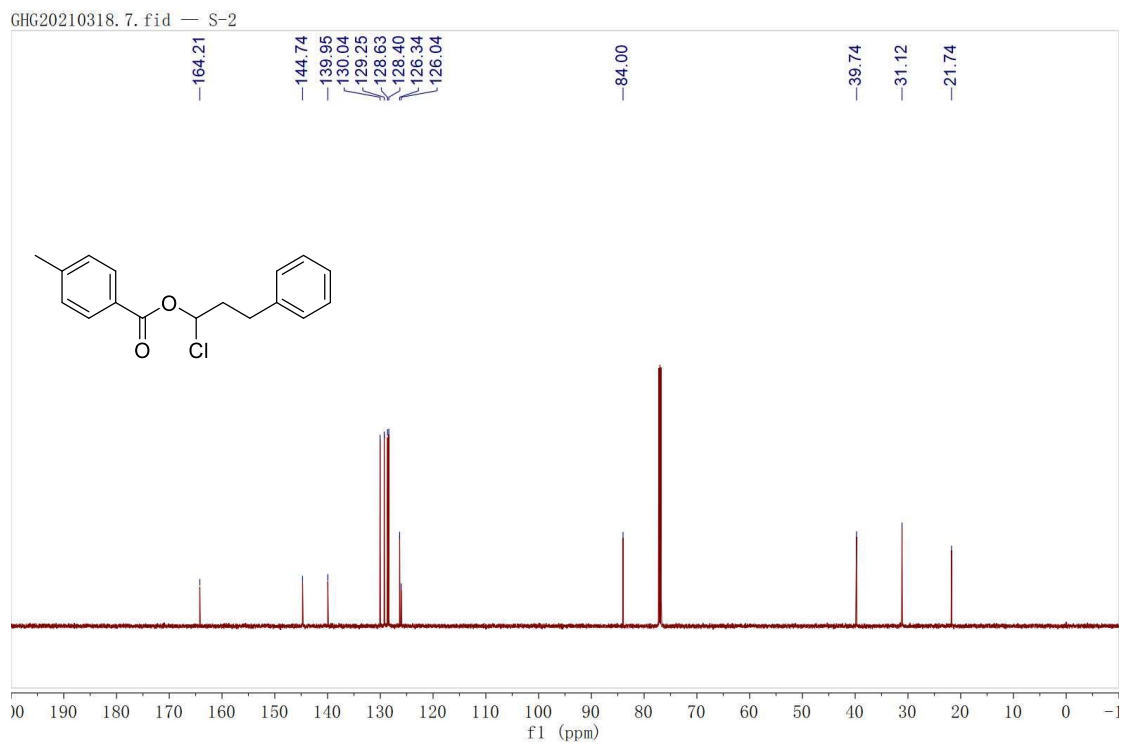

SM13, <sup>1</sup>H-NMR (600 MHz, CDCl<sub>3</sub>)

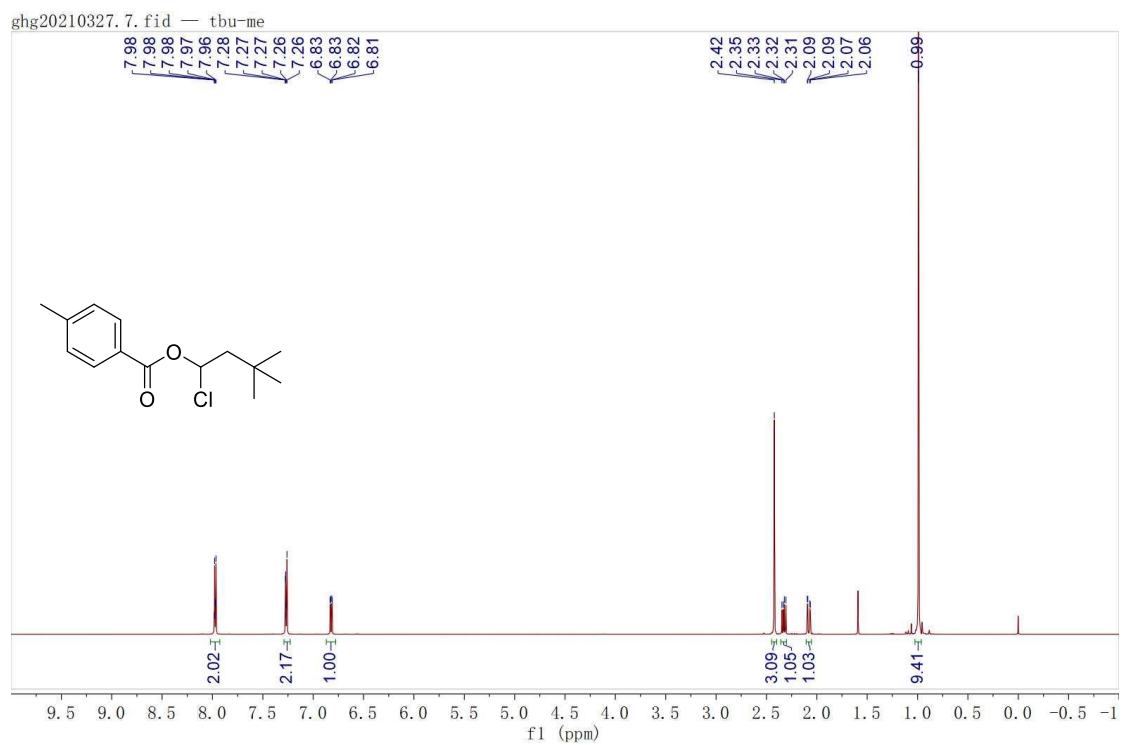

SM13, <sup>13</sup>C NMR (151 MHz, CDCl<sub>3</sub>)

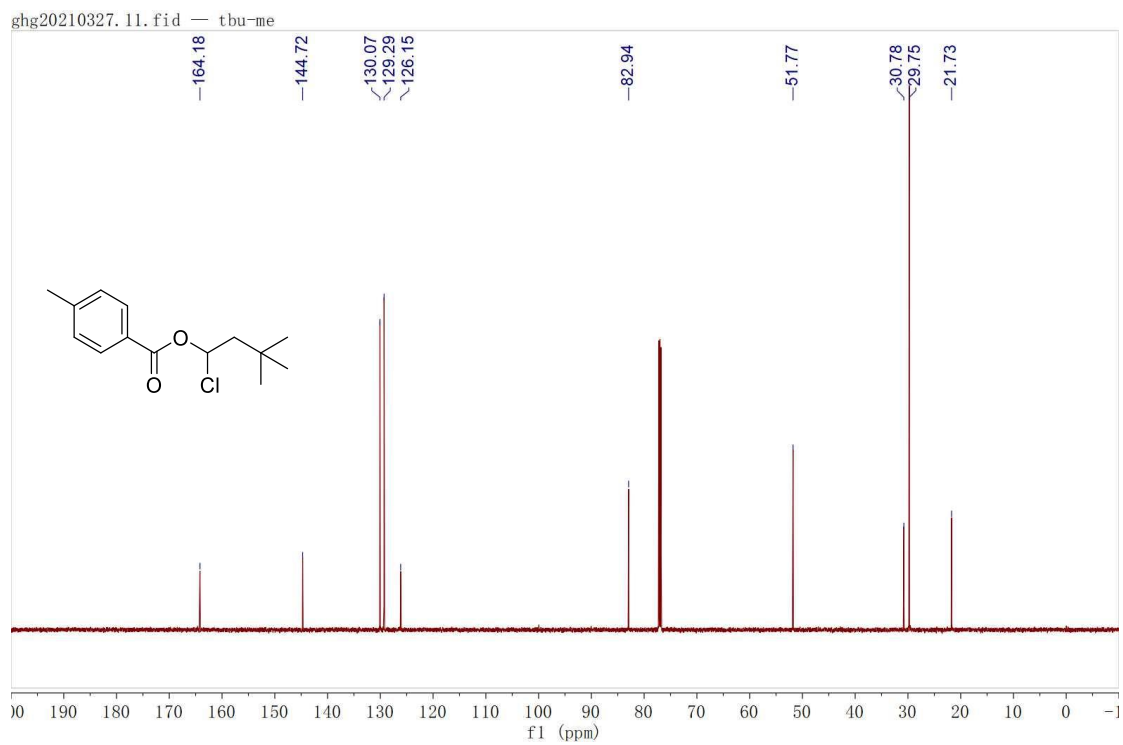

SM14, <sup>1</sup>H-NMR (600 MHz, CDCl<sub>3</sub>)

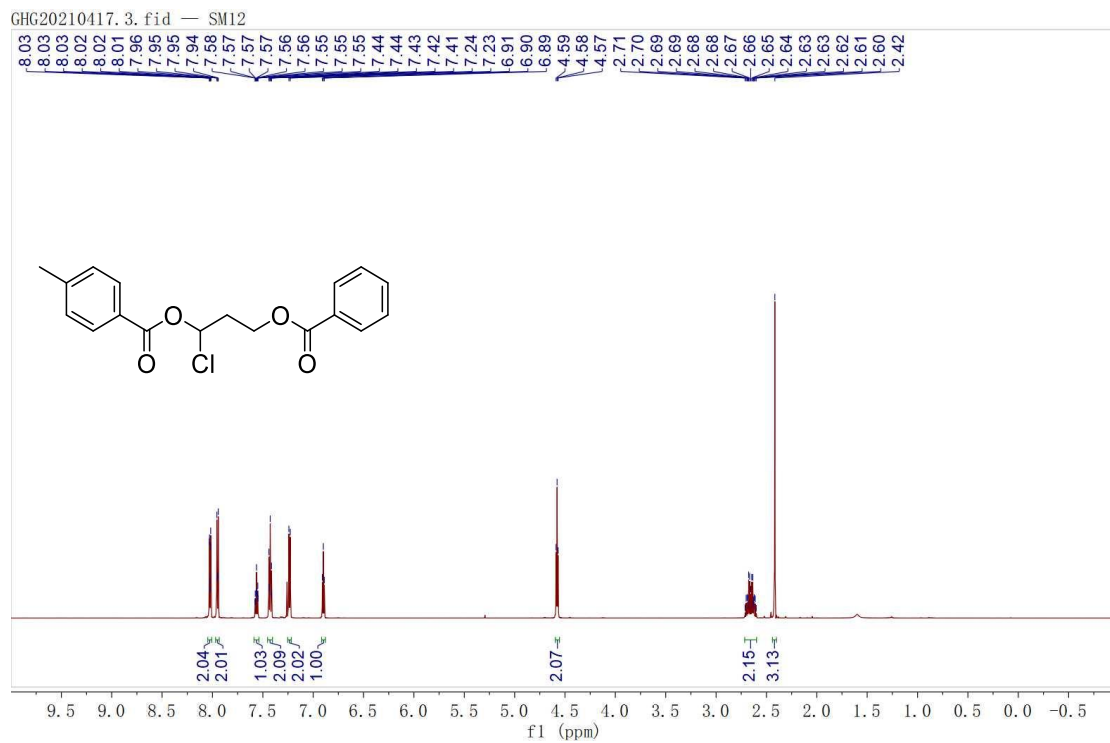

SM14, <sup>13</sup>C NMR (151 MHz, CDCl<sub>3</sub>)

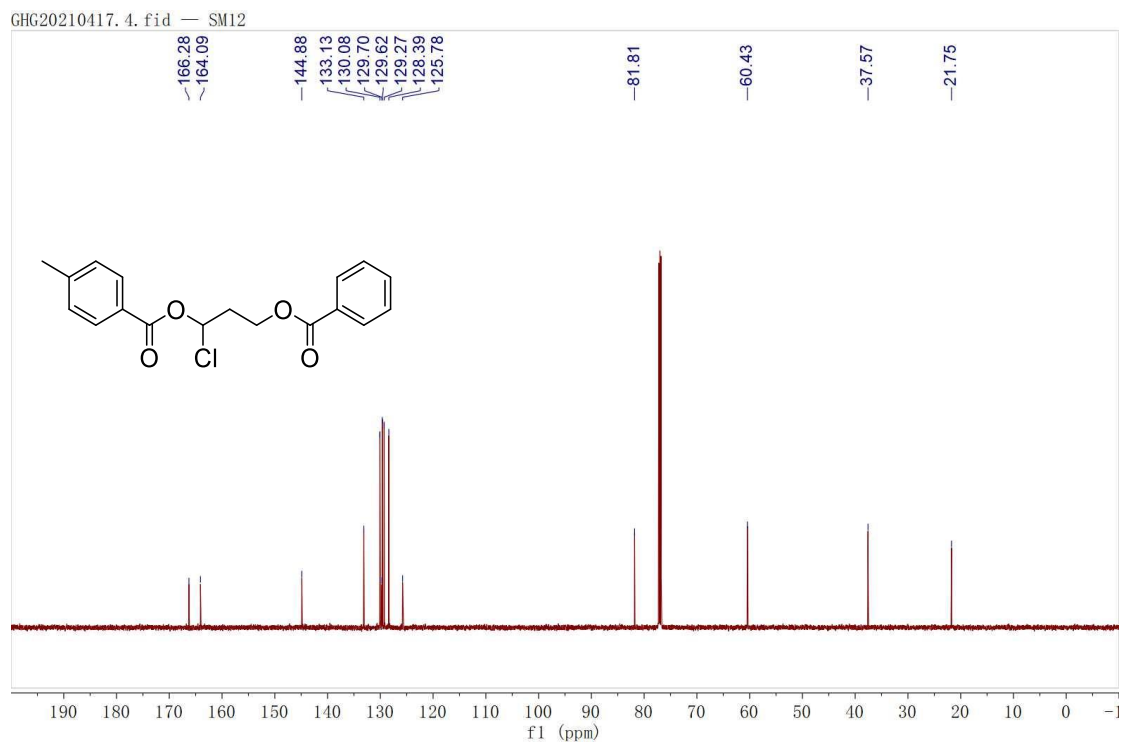

SM15, <sup>1</sup>H-NMR (600 MHz, CDCl<sub>3</sub>)

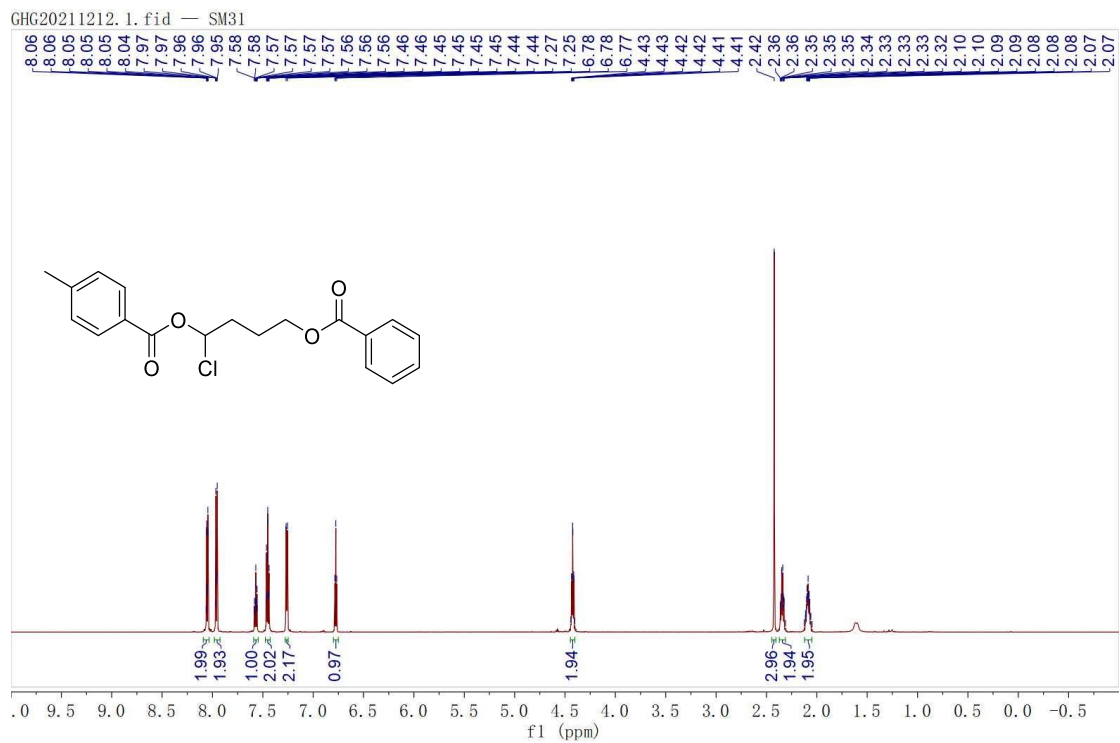

SM15, <sup>13</sup>C NMR (151 MHz, CDCl<sub>3</sub>)

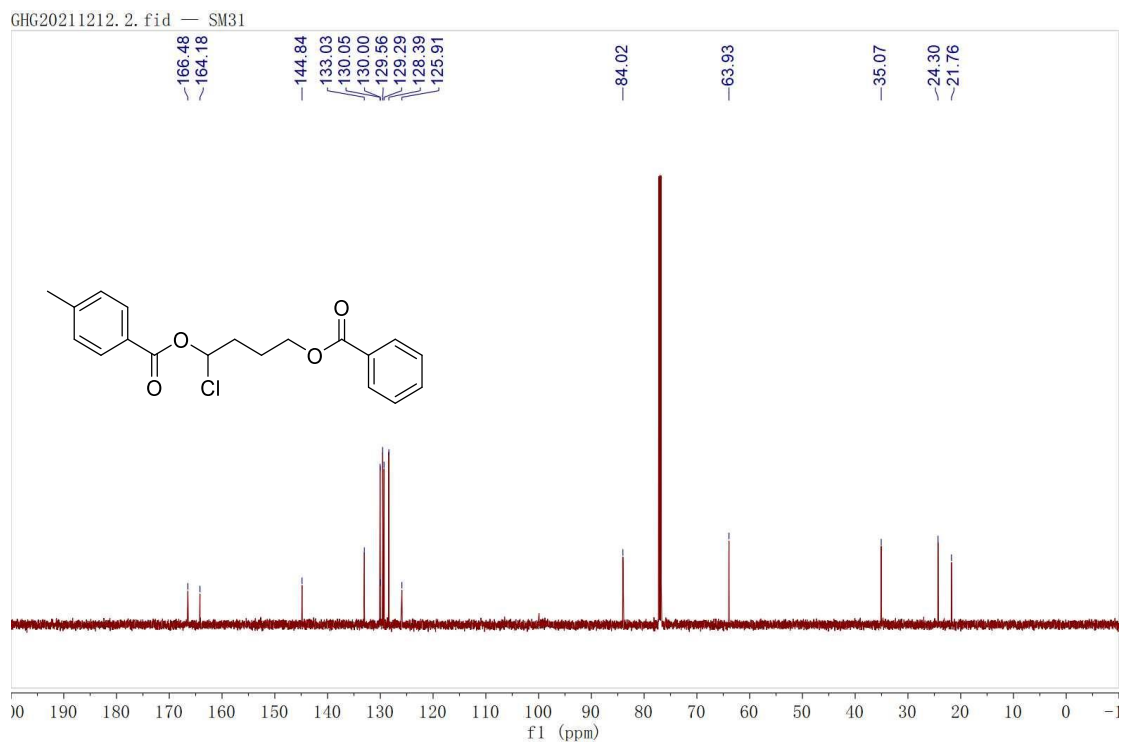

SM16, <sup>1</sup>H-NMR (600 MHz, CDCl<sub>3</sub>)

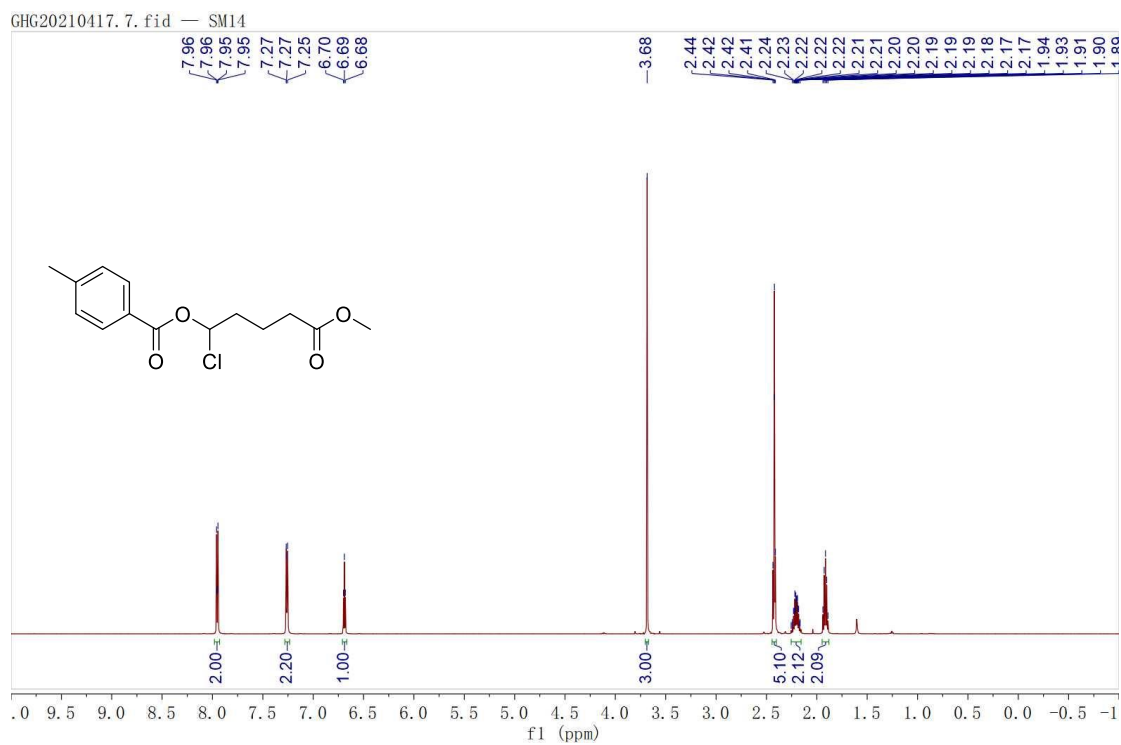



**SM16, <sup>13</sup>C NMR (151 MHz, CDCl<sub>3</sub>)**

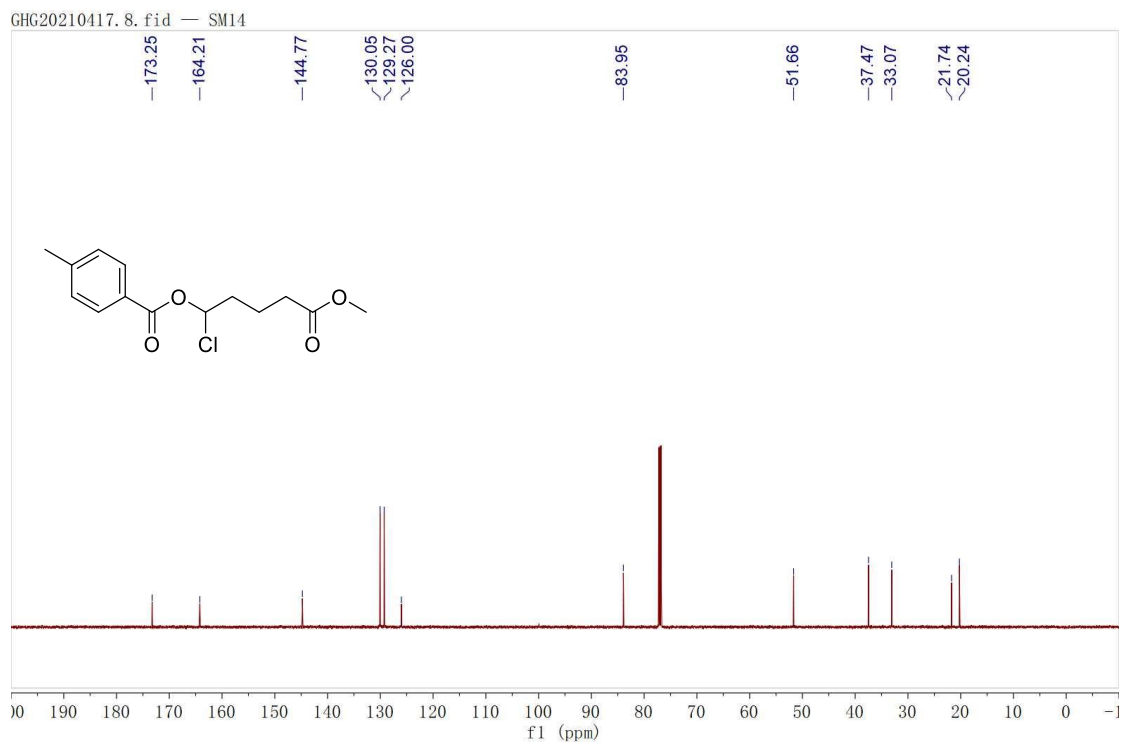

**SM17, <sup>1</sup>H-NMR (600 MHz, CDCl<sub>3</sub>)**

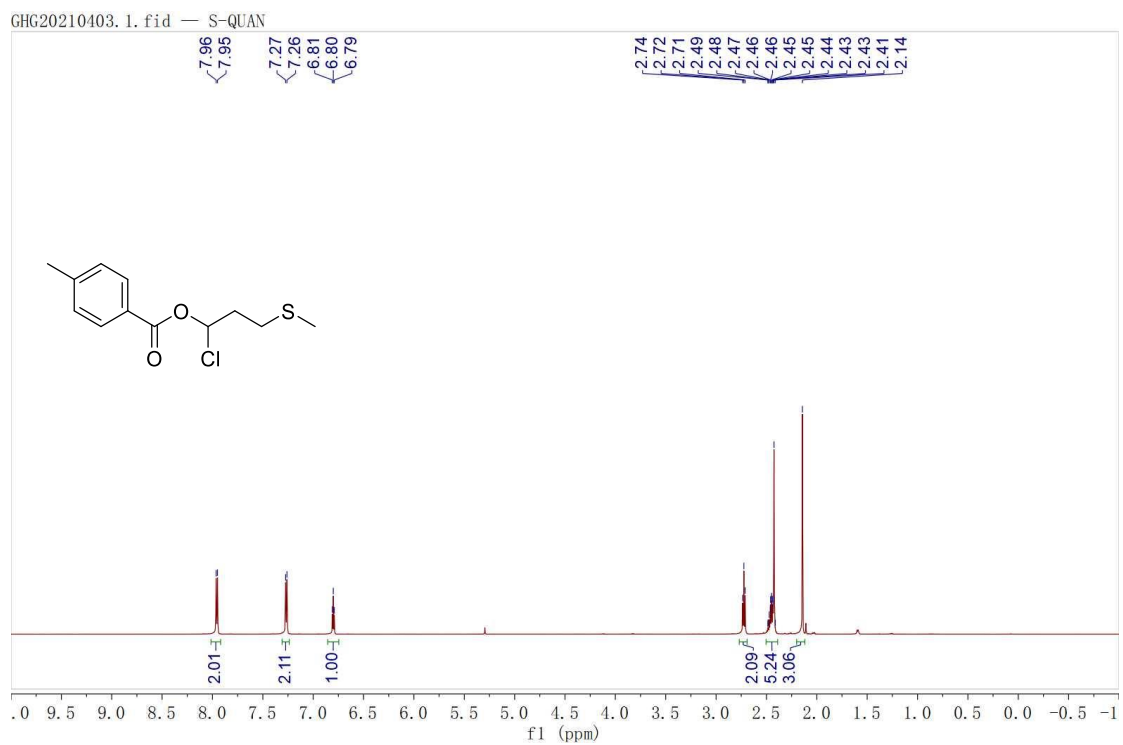

SM17, <sup>13</sup>C NMR (151 MHz, CDCl<sub>3</sub>)

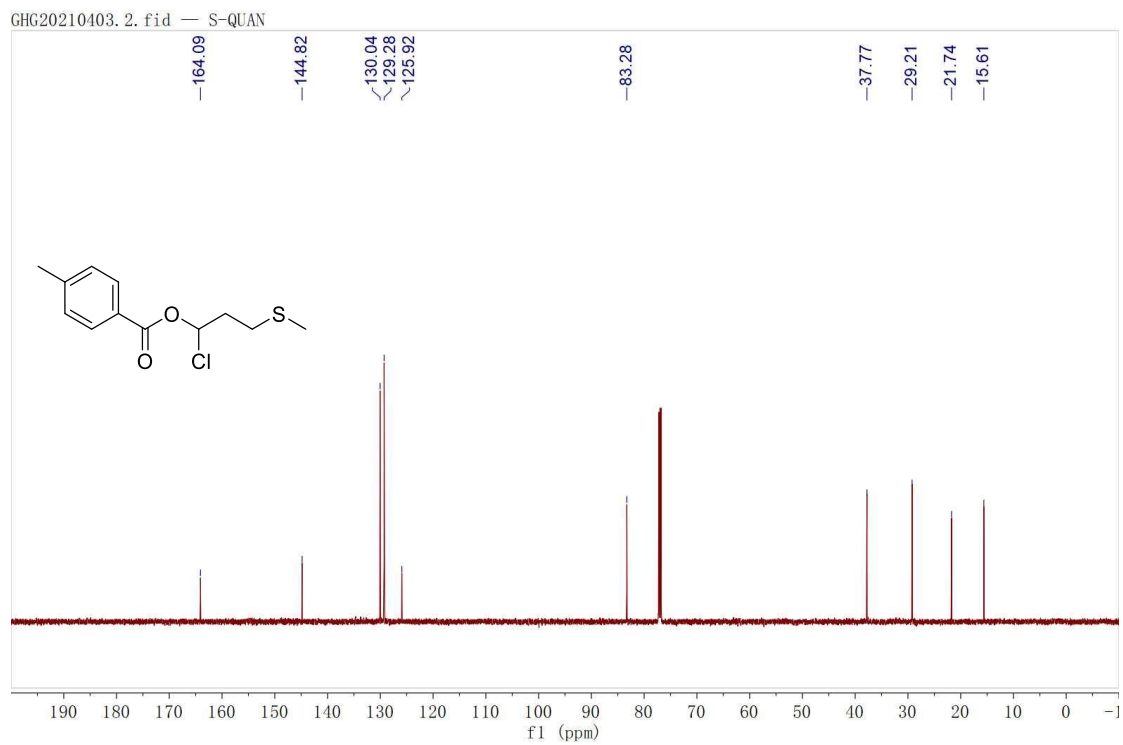

SM18, <sup>1</sup>H-NMR (600 MHz, CDCl<sub>3</sub>)

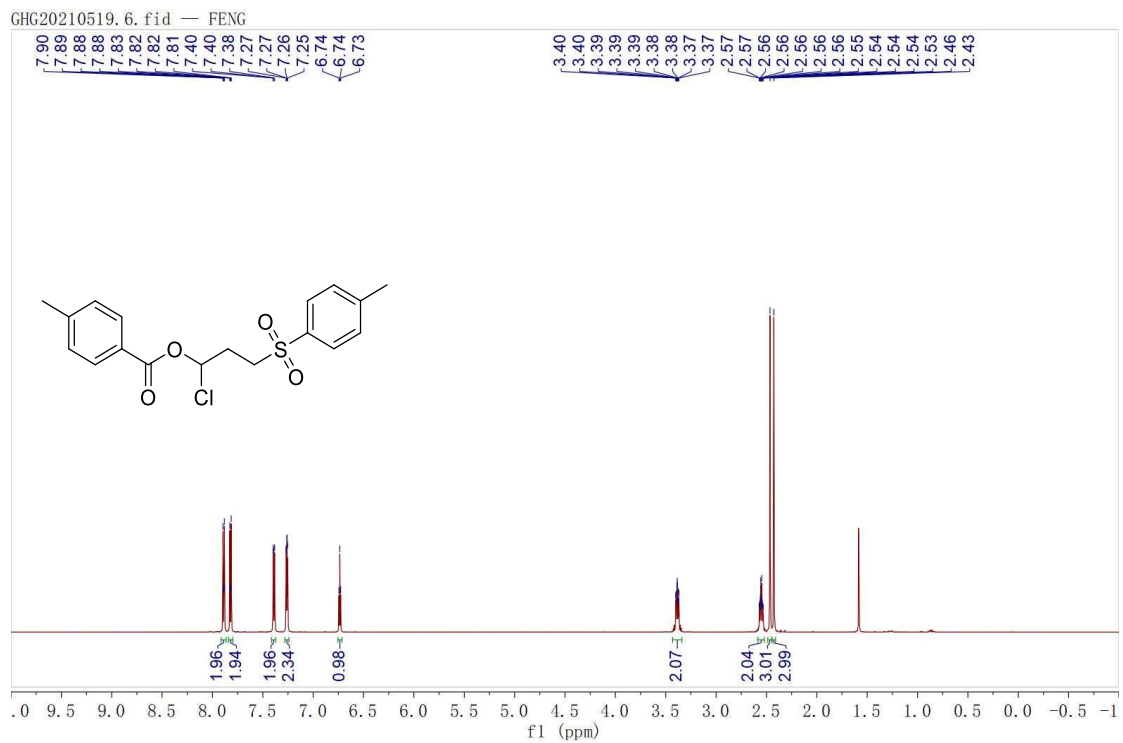

SM18, <sup>13</sup>C NMR (151 MHz, CDCl<sub>3</sub>)

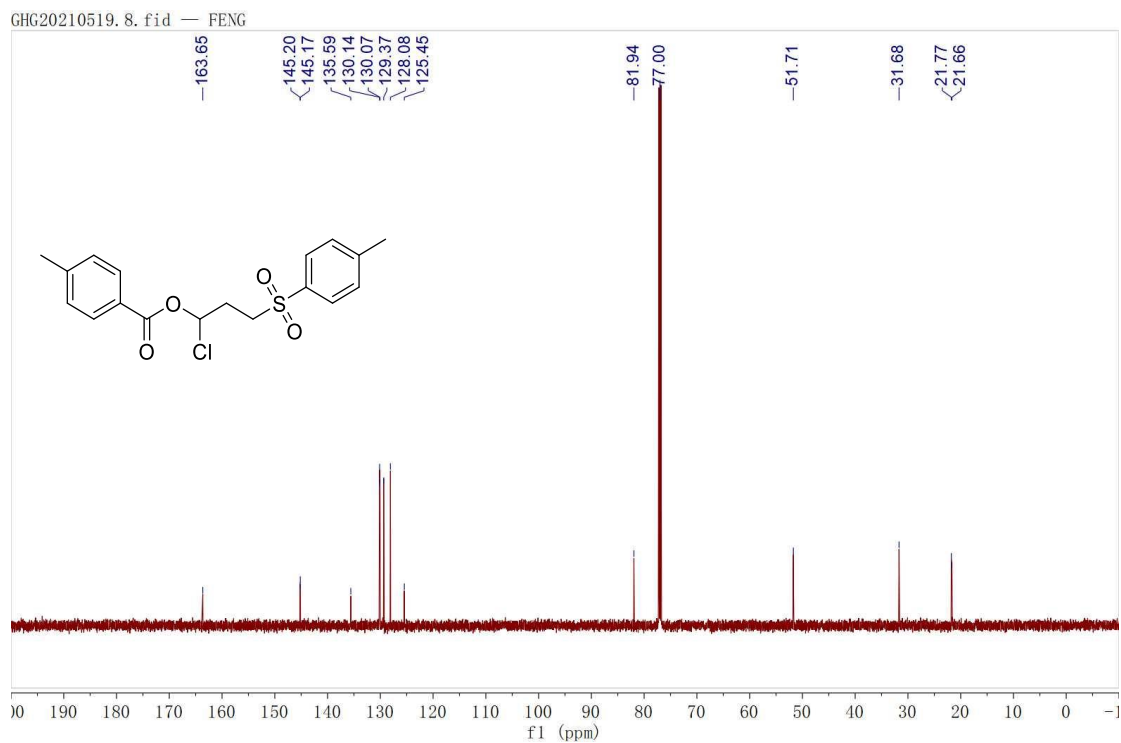

SM19, <sup>1</sup>H-NMR (600 MHz, CDCl<sub>3</sub>)

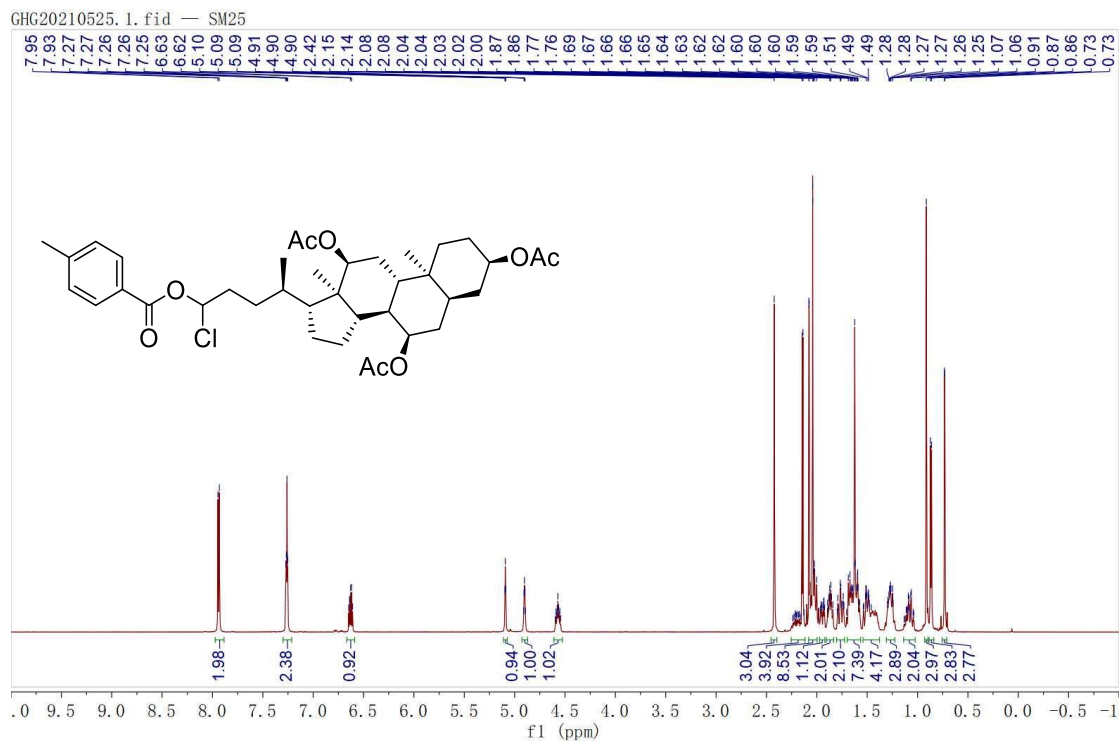

SM19, <sup>13</sup>C NMR (151 MHz, CDCl<sub>3</sub>)

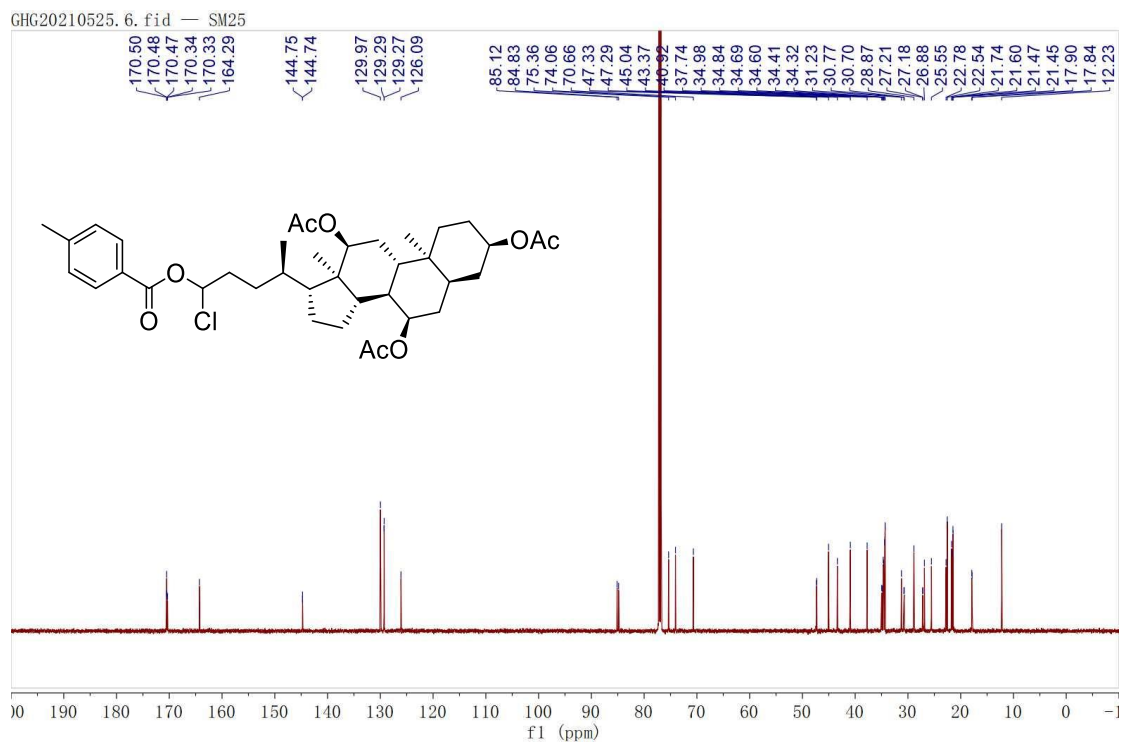

2, <sup>1</sup>H-NMR (600 MHz, CDCl<sub>3</sub>)

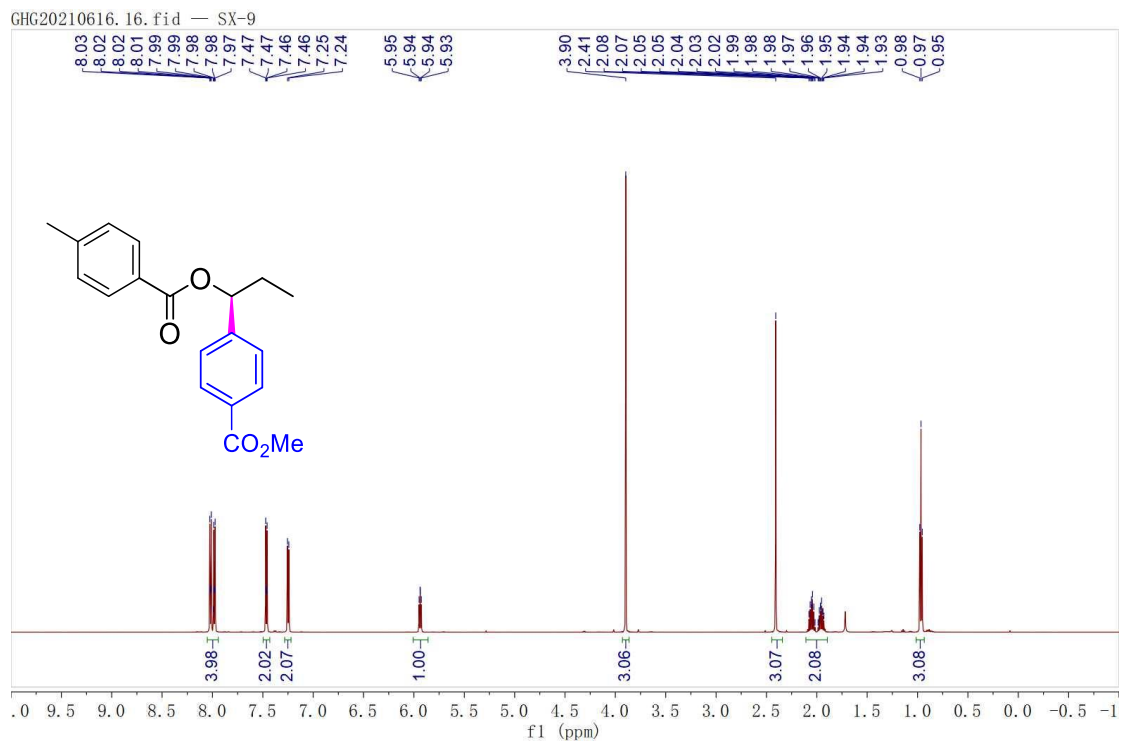

### 2, <sup>13</sup>C NMR (151 MHz, CDCl<sub>3</sub>)

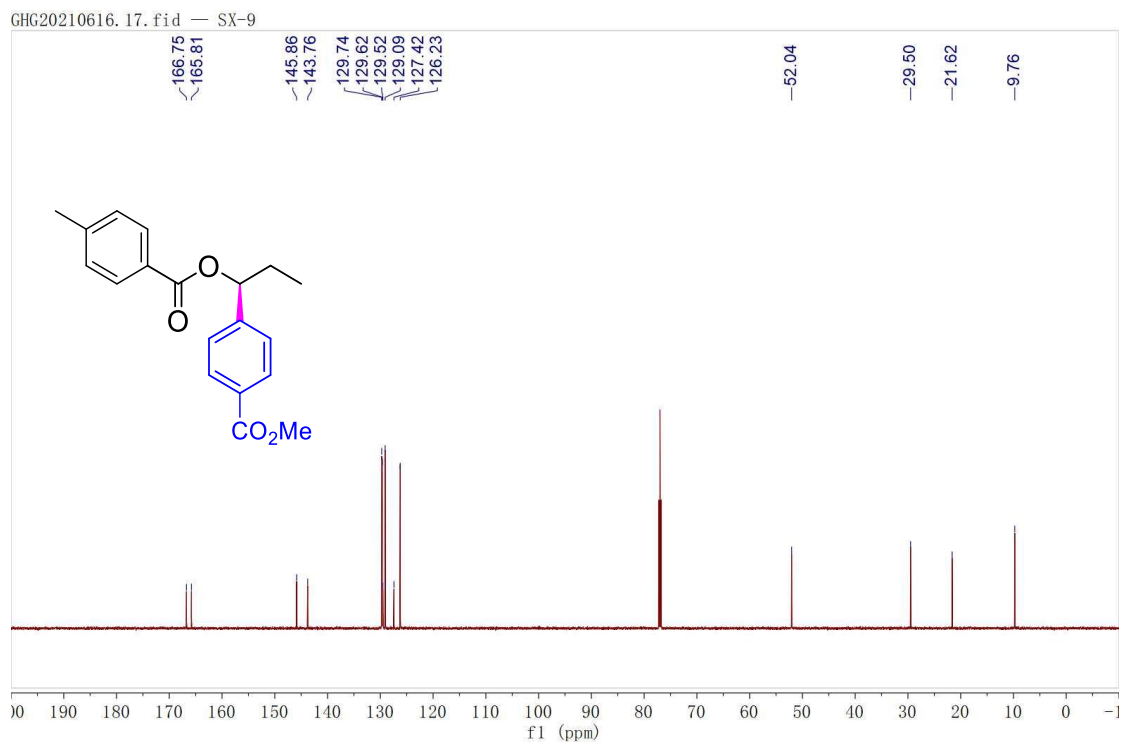

### 3, <sup>1</sup>H-NMR (600 MHz, CDCl<sub>3</sub>)

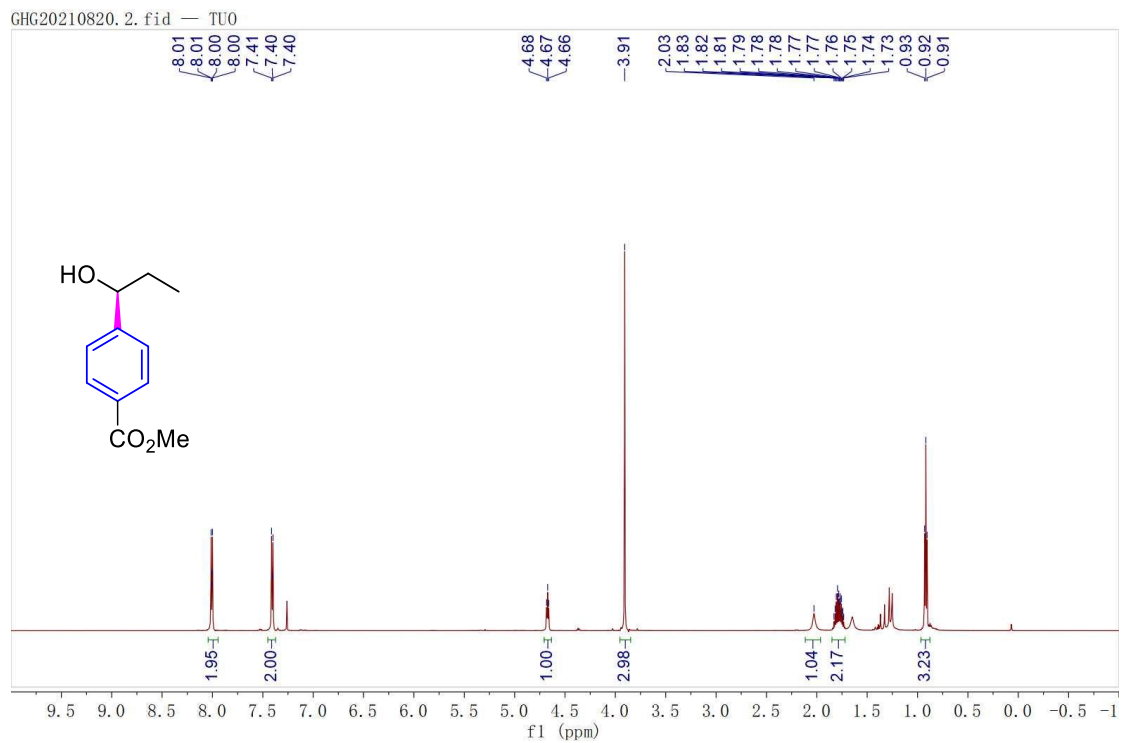

### 3, <sup>13</sup>C NMR (101 MHz, CDCl<sub>3</sub>)

SDL20211204-CHUN 1 — single pulse decoupled gated NOE

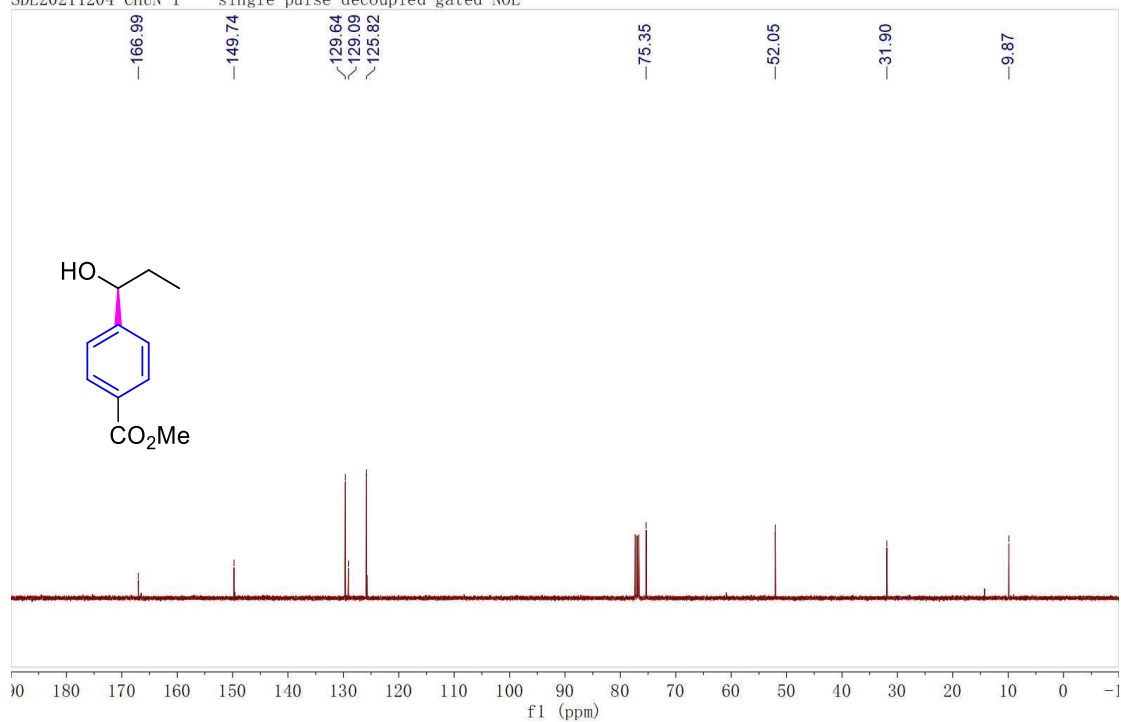

### 4, <sup>1</sup>H-NMR (600 MHz, CDCl<sub>3</sub>)

GHG20210609.12.fid — 104

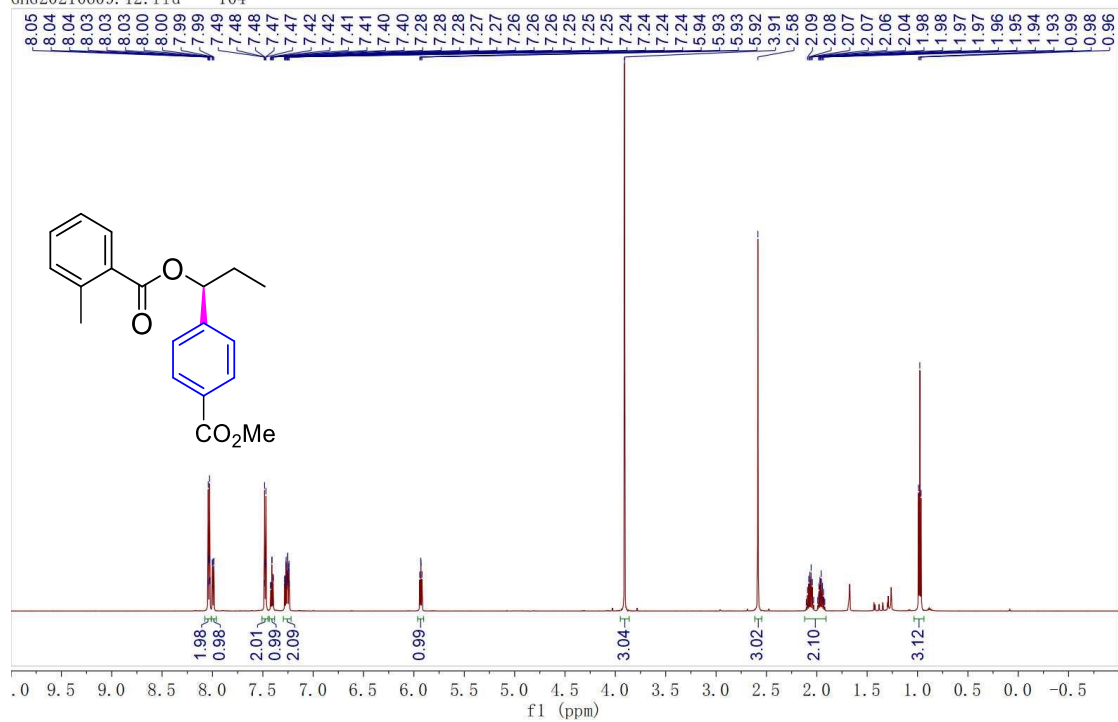

4, <sup>13</sup>C NMR (151 MHz, CDCl<sub>3</sub>)

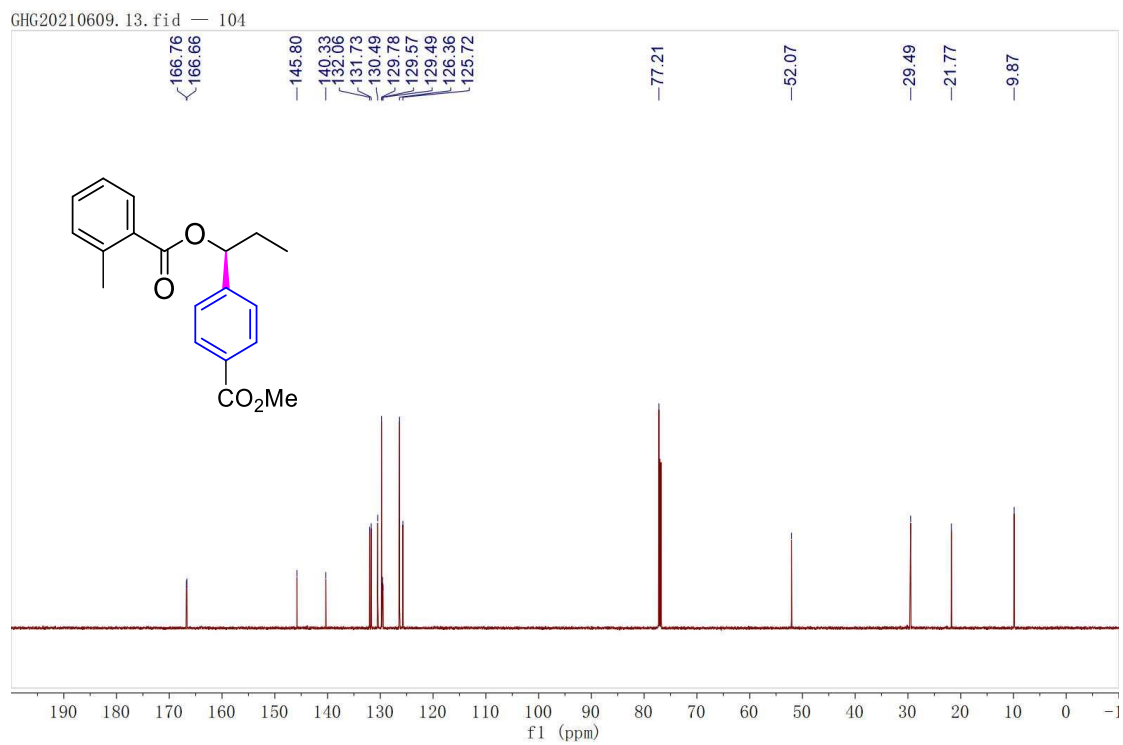

5, <sup>1</sup>H-NMR (600 MHz, CDCl<sub>3</sub>)

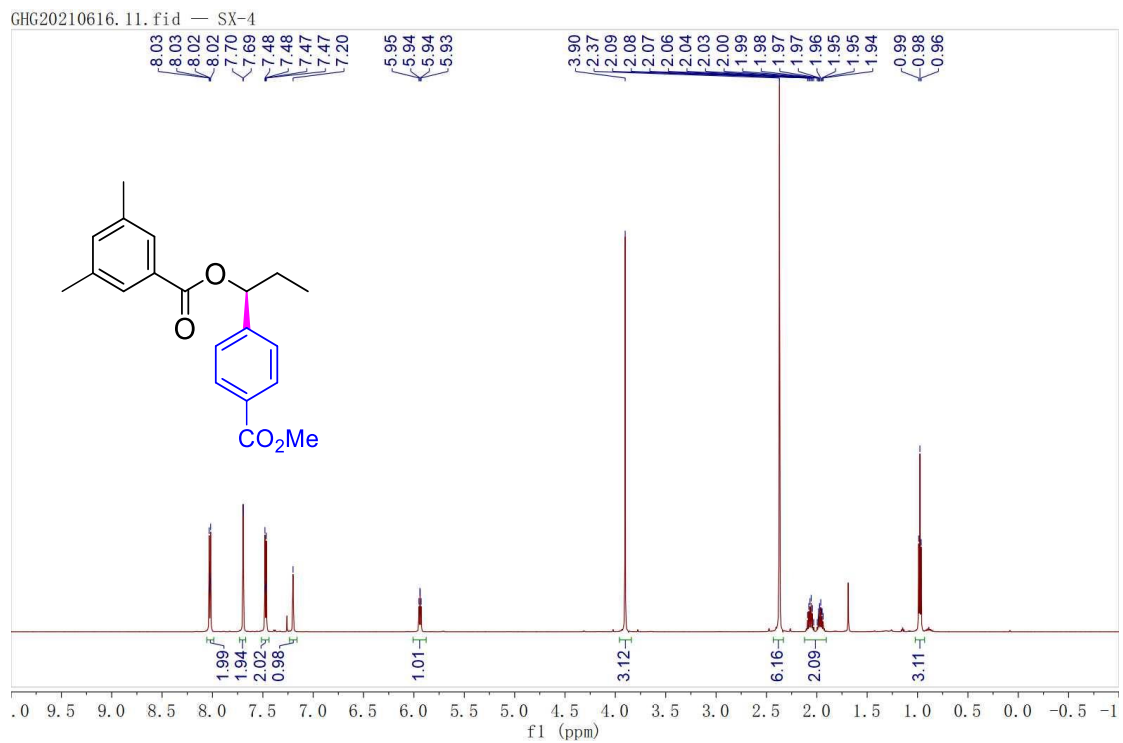

### 5, <sup>13</sup>C NMR (151 MHz, CDCl<sub>3</sub>)

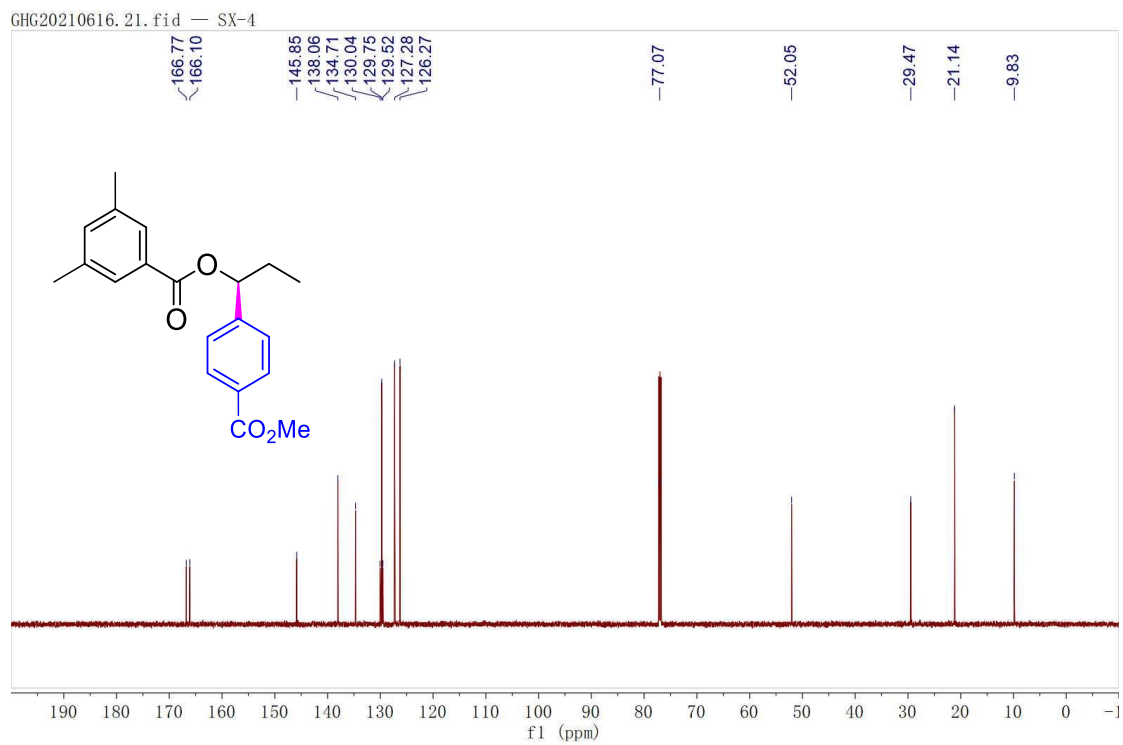

### 6, <sup>1</sup>H-NMR (600 MHz, CDCl<sub>3</sub>)

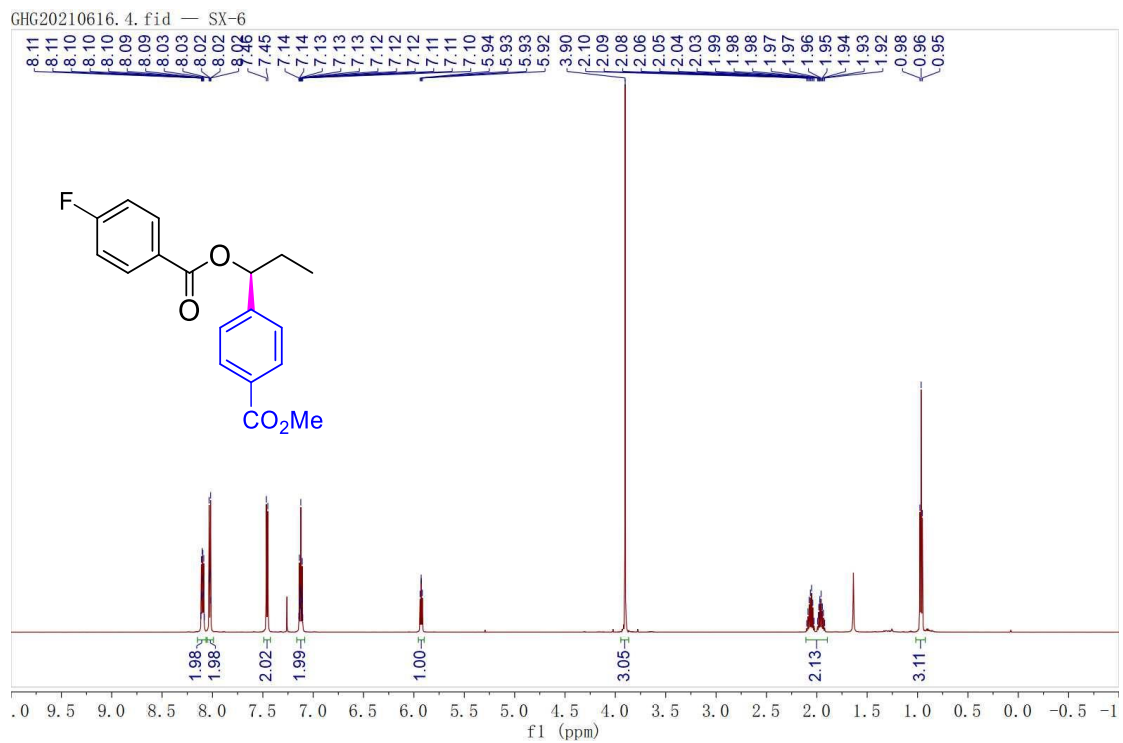



**6, <sup>13</sup>C NMR (151 MHz, CDCl<sub>3</sub>)**

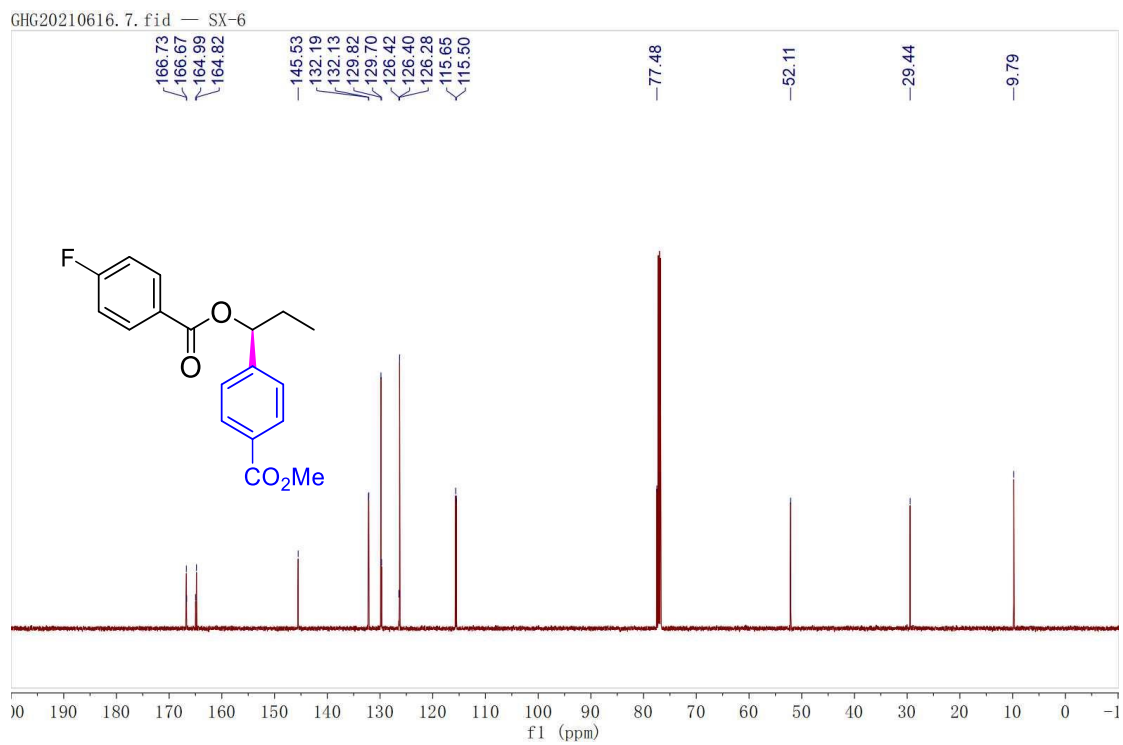

**6, <sup>19</sup>F NMR (565 MHz, CDCl<sub>3</sub>)**

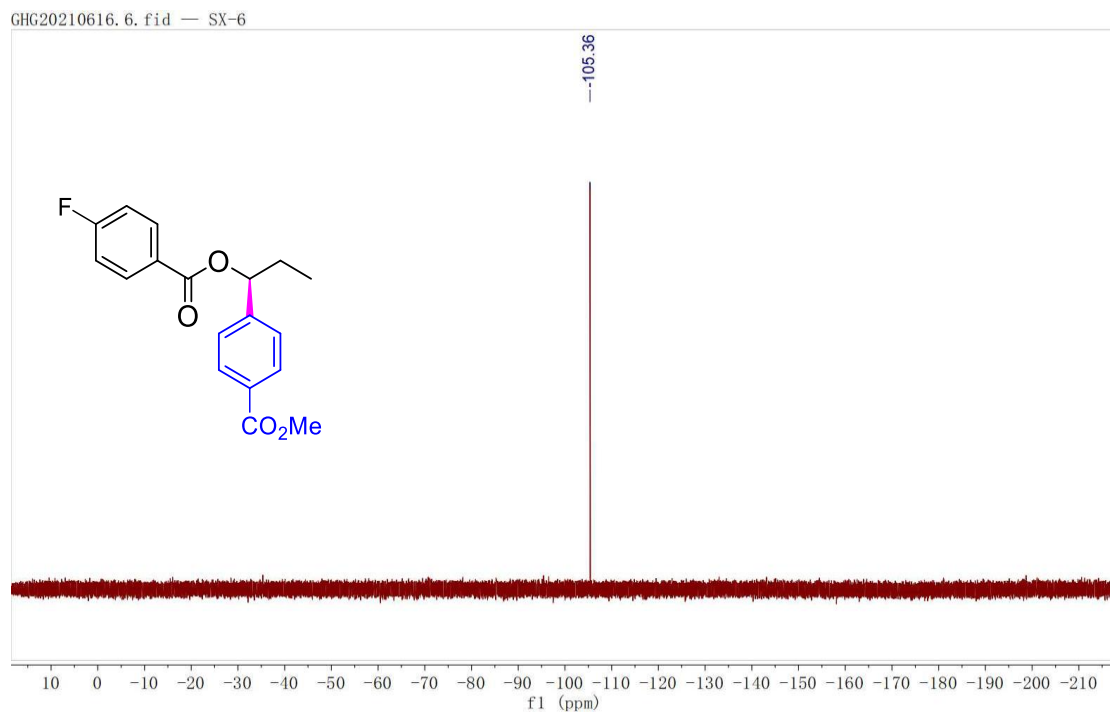

7, <sup>1</sup>H-NMR (600 MHz, CDCl<sub>3</sub>)

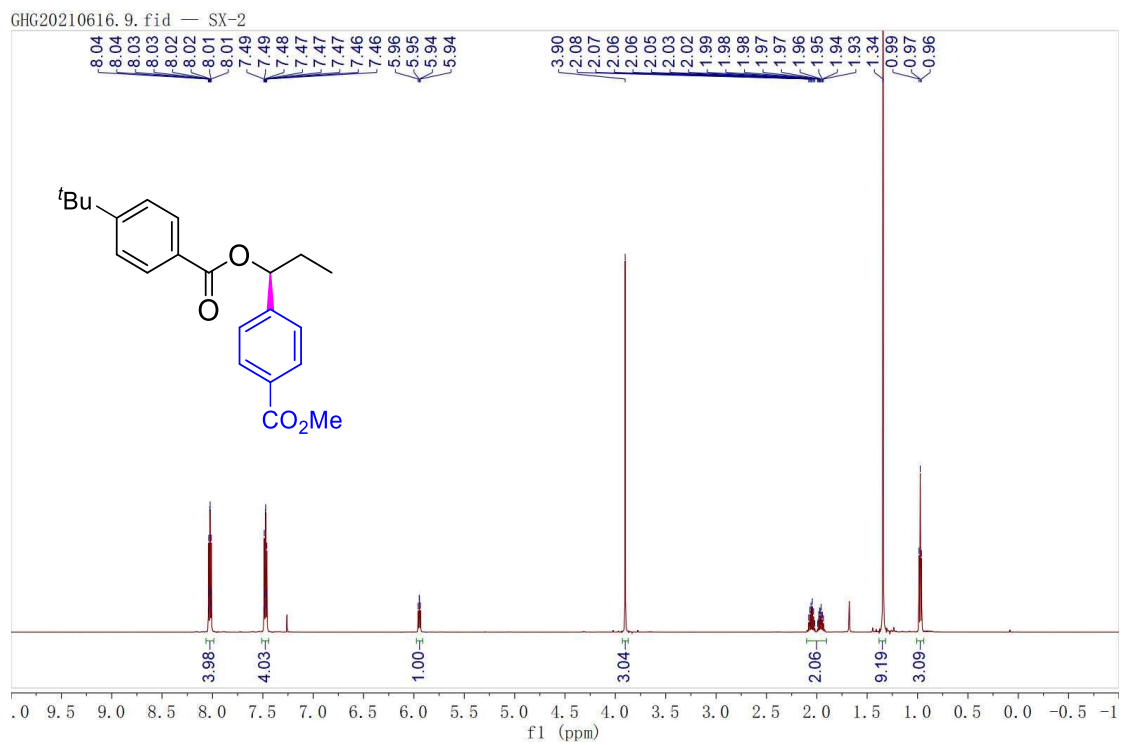

7, <sup>13</sup>C NMR (151 MHz, CDCl<sub>3</sub>)

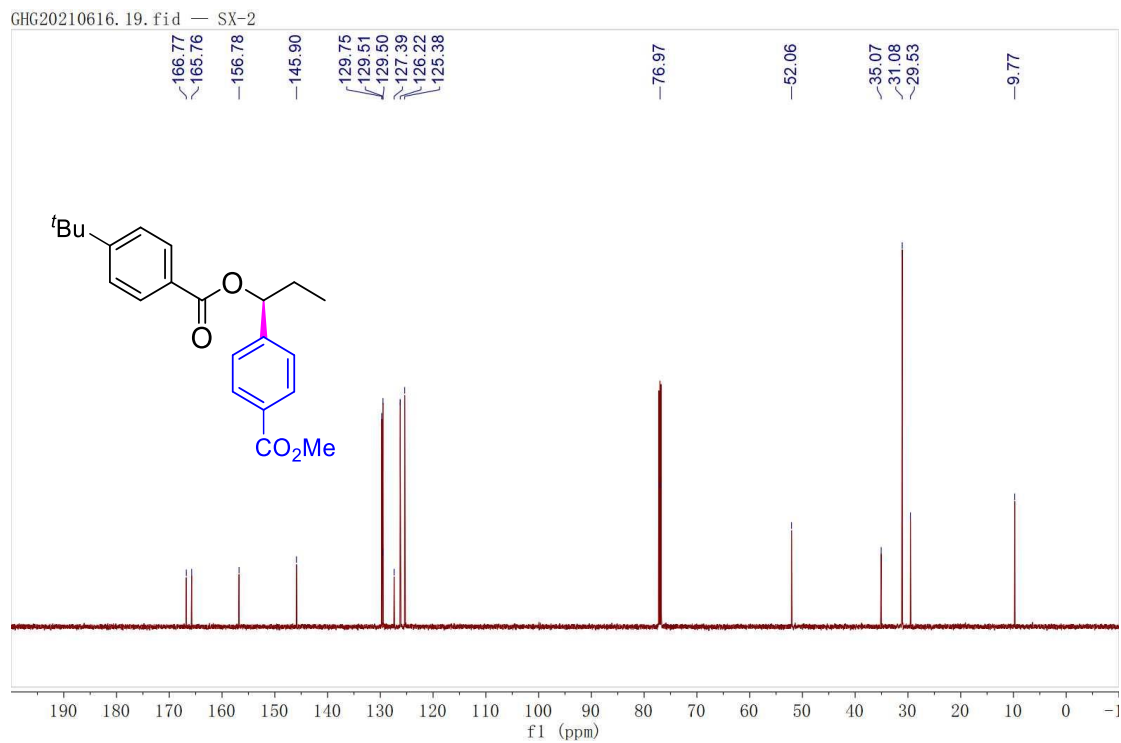

8, <sup>1</sup>H-NMR (600 MHz, CDCl<sub>3</sub>)

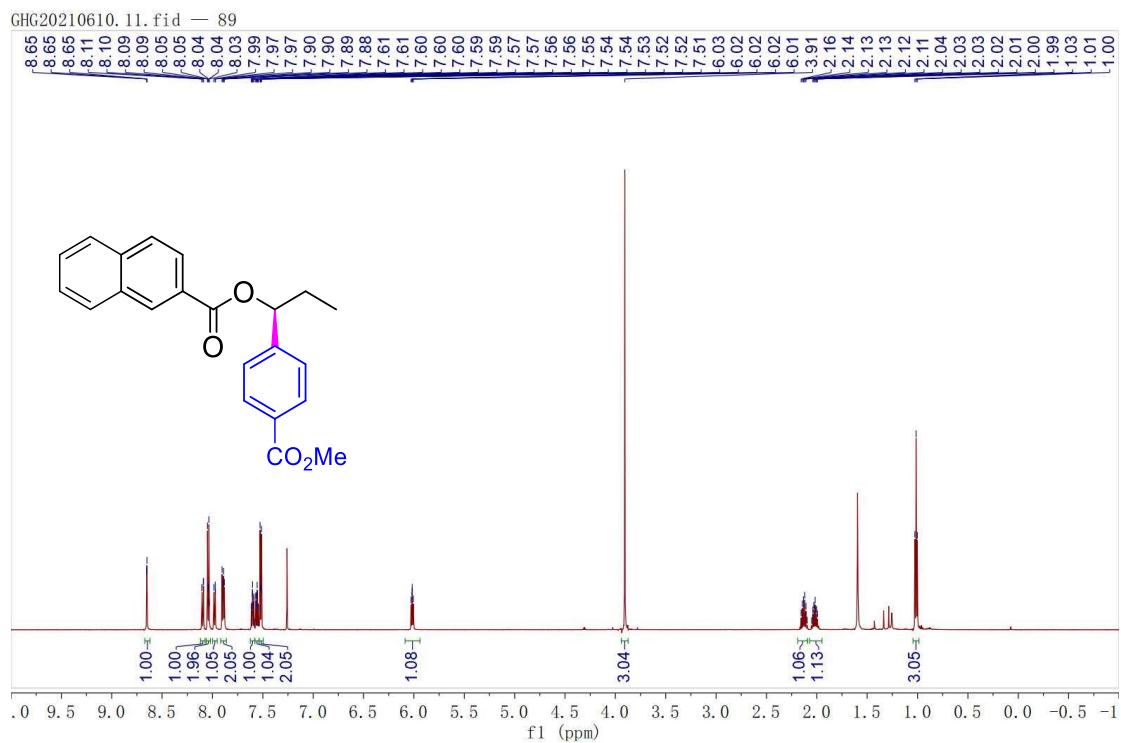

8, <sup>13</sup>C NMR (151 MHz, CDCl<sub>3</sub>)

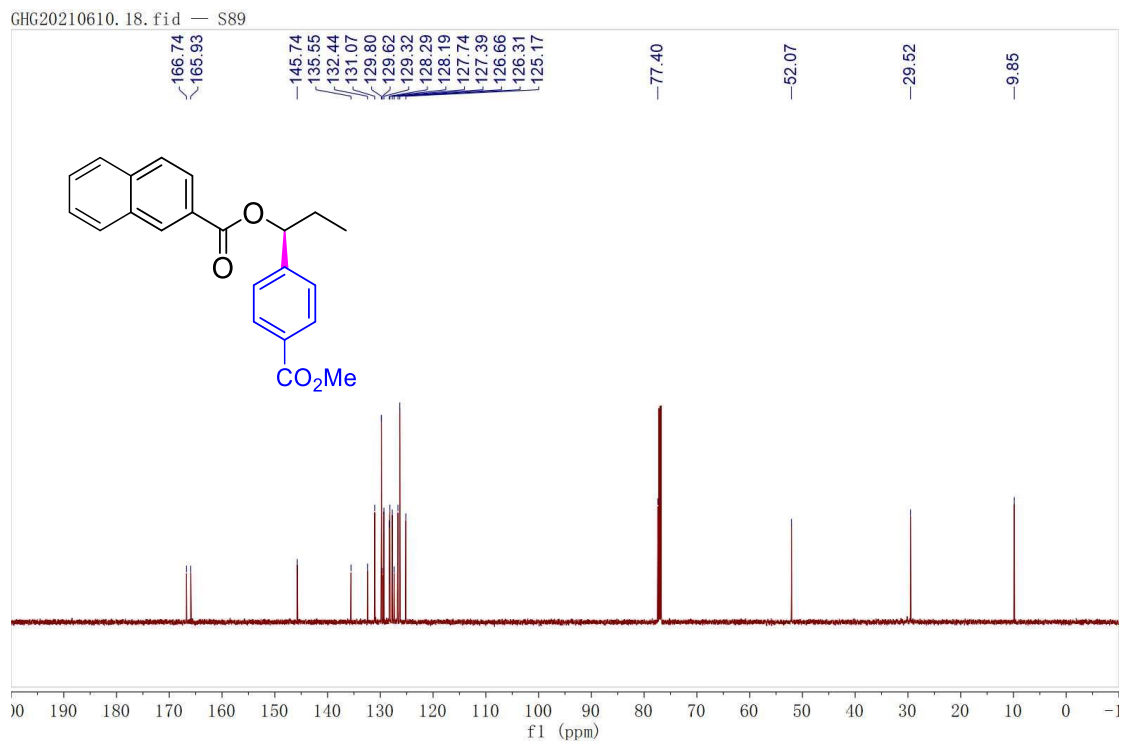

**9, <sup>1</sup>H-NMR (600 MHz, CDCl<sub>3</sub>)**

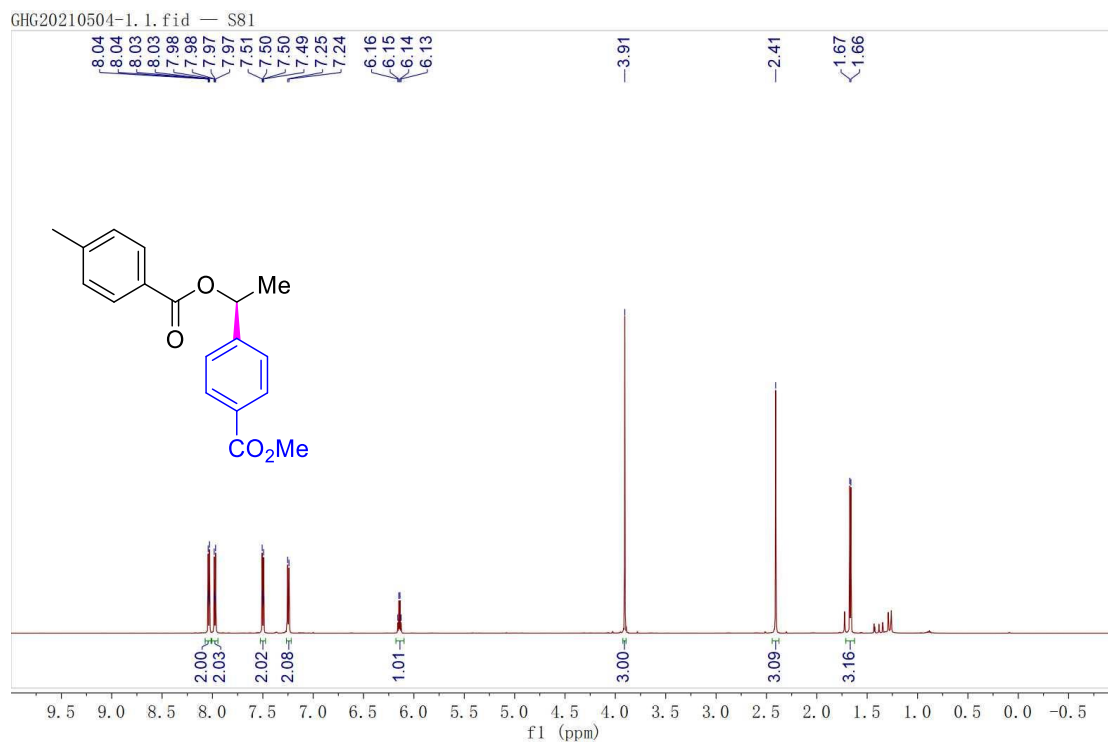

**9, <sup>13</sup>C NMR (151 MHz, CDCl<sub>3</sub>)**

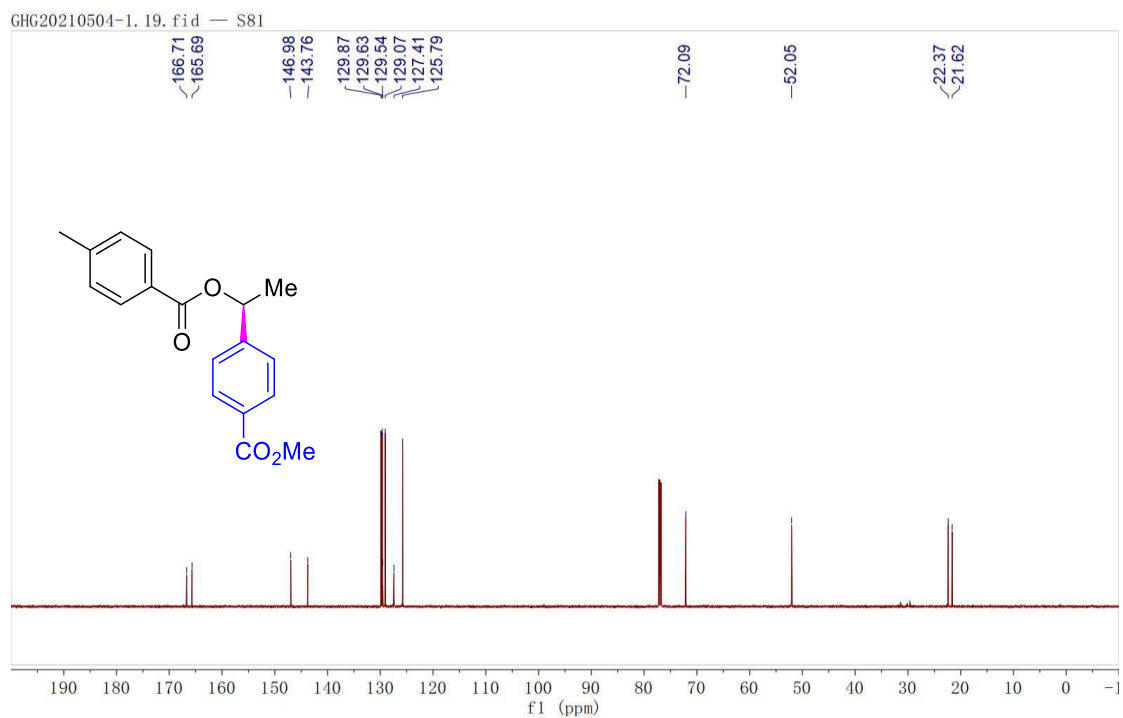

### 10, <sup>1</sup>H-NMR (600 MHz, CDCl<sub>3</sub>)

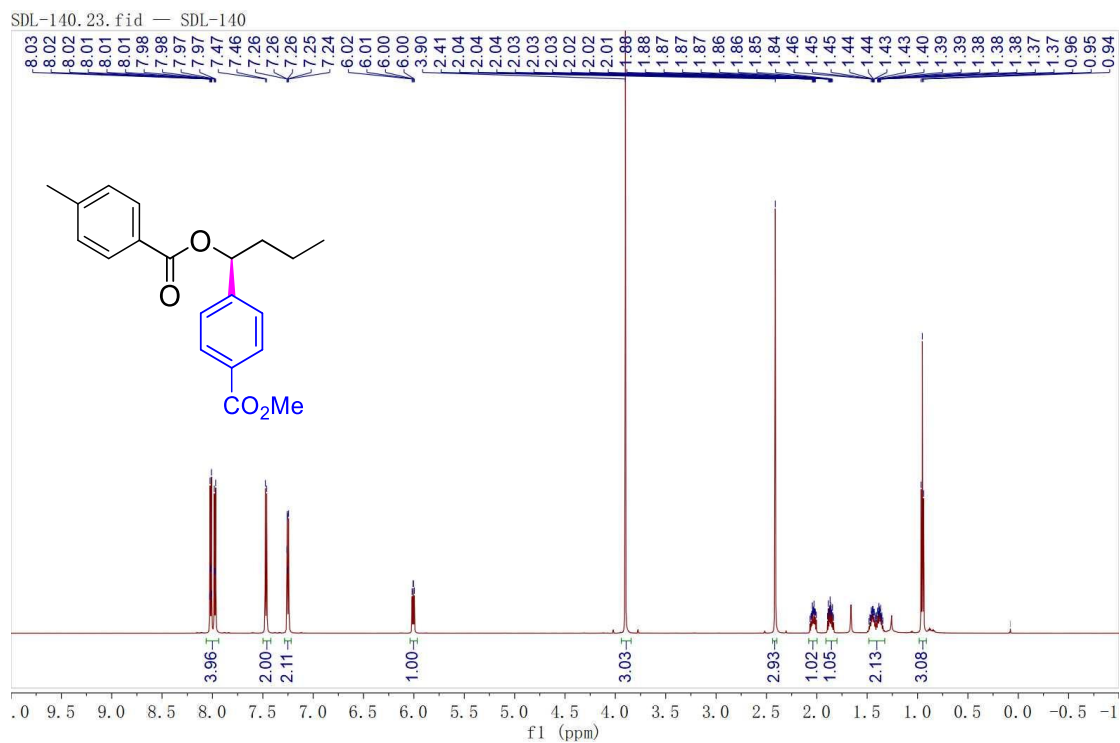

### 10, <sup>13</sup>C NMR (151 MHz, CDCl<sub>3</sub>)

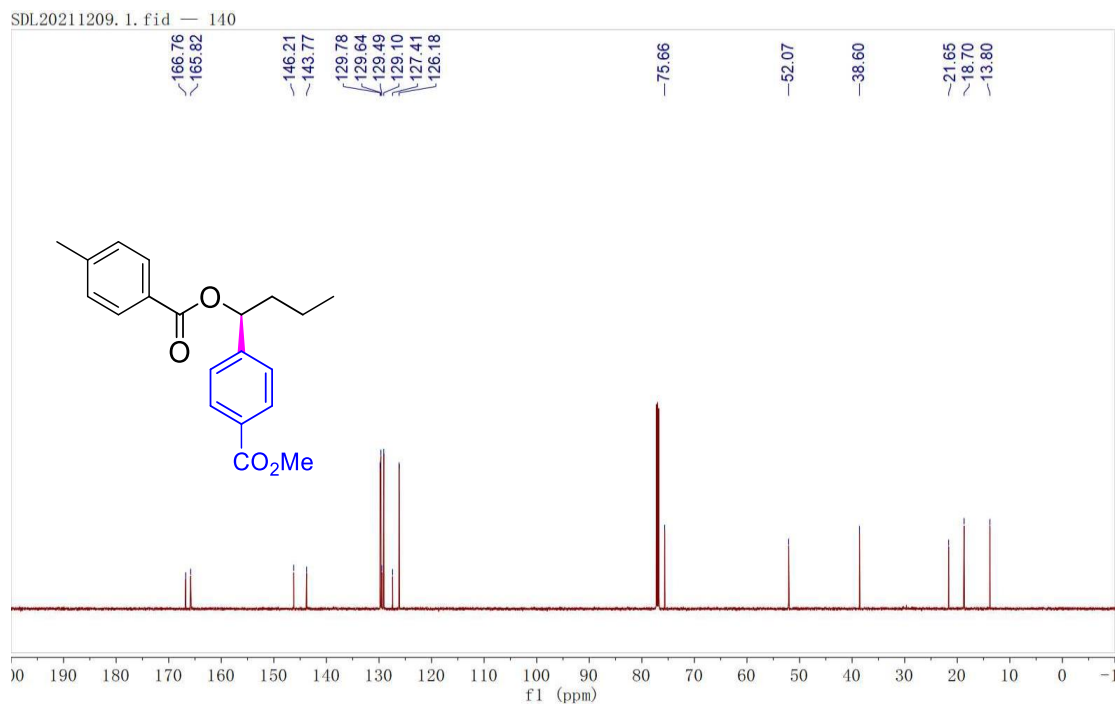

11, <sup>1</sup>H-NMR (600 MHz, CDCl<sub>3</sub>)

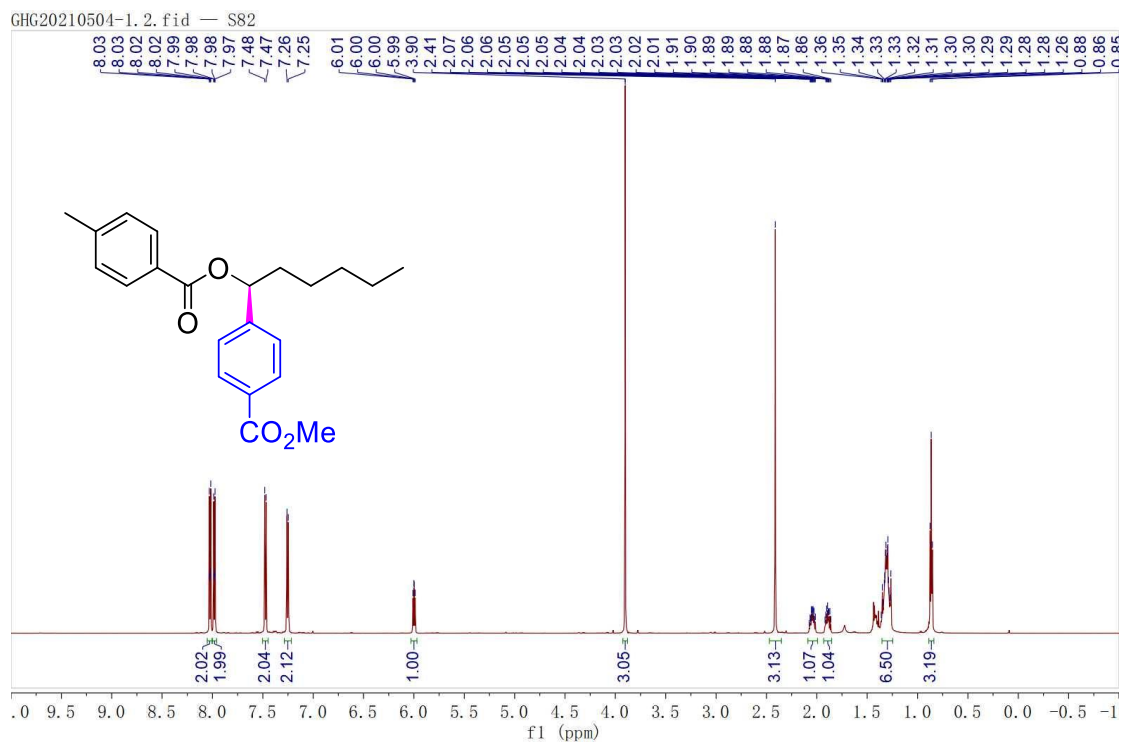

11, <sup>13</sup>C NMR (151 MHz, CDCl<sub>3</sub>)

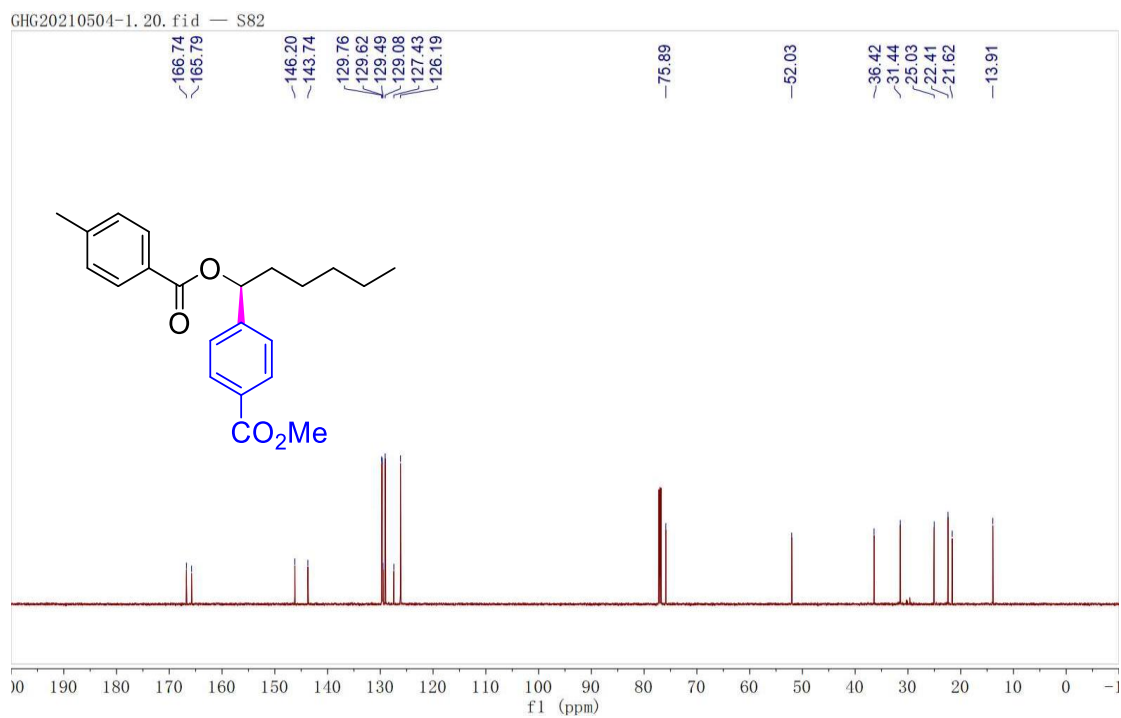

## 12, <sup>1</sup>H-NMR (600 MHz, CDCl<sub>3</sub>)

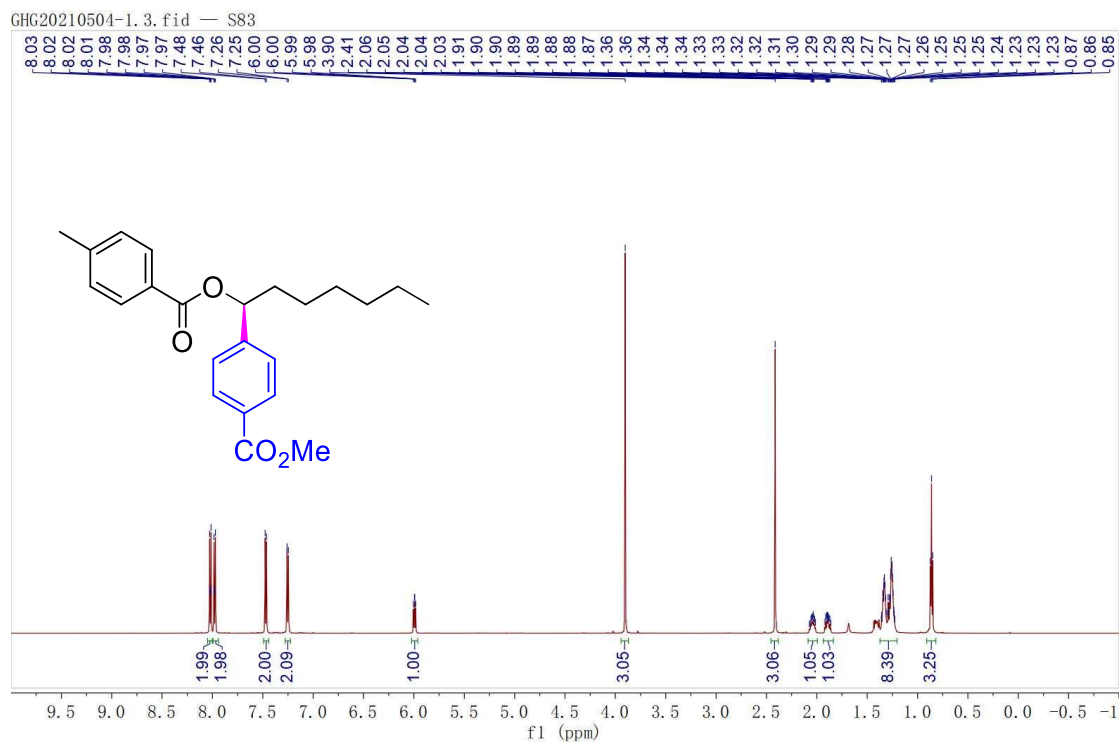

## 12, <sup>13</sup>C NMR (151 MHz, CDCl<sub>3</sub>)

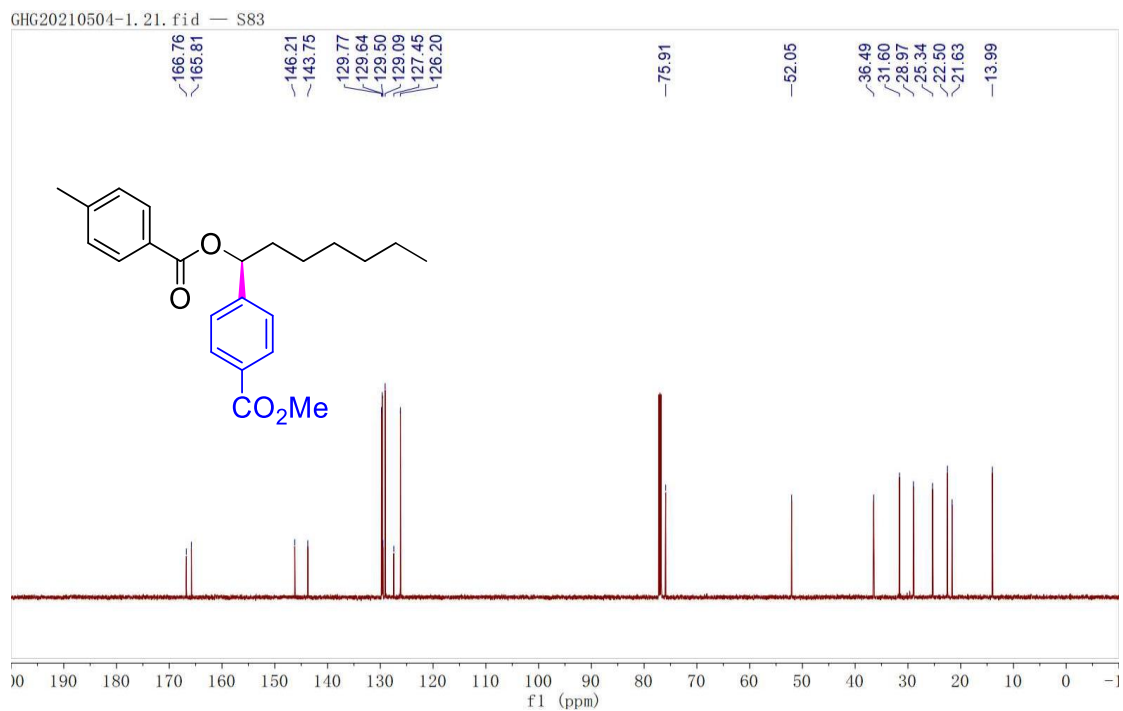

### 13, <sup>1</sup>H-NMR (600 MHz, CDCl<sub>3</sub>)

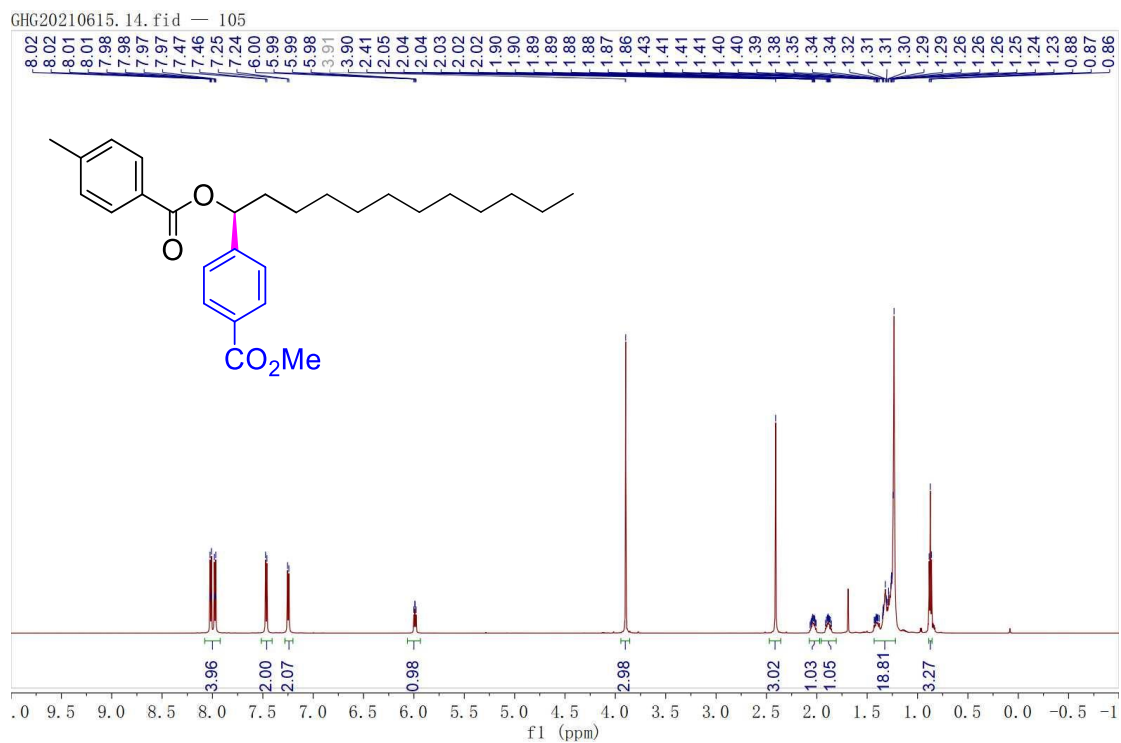

### 13, <sup>13</sup>C NMR (151 MHz, CDCl<sub>3</sub>)

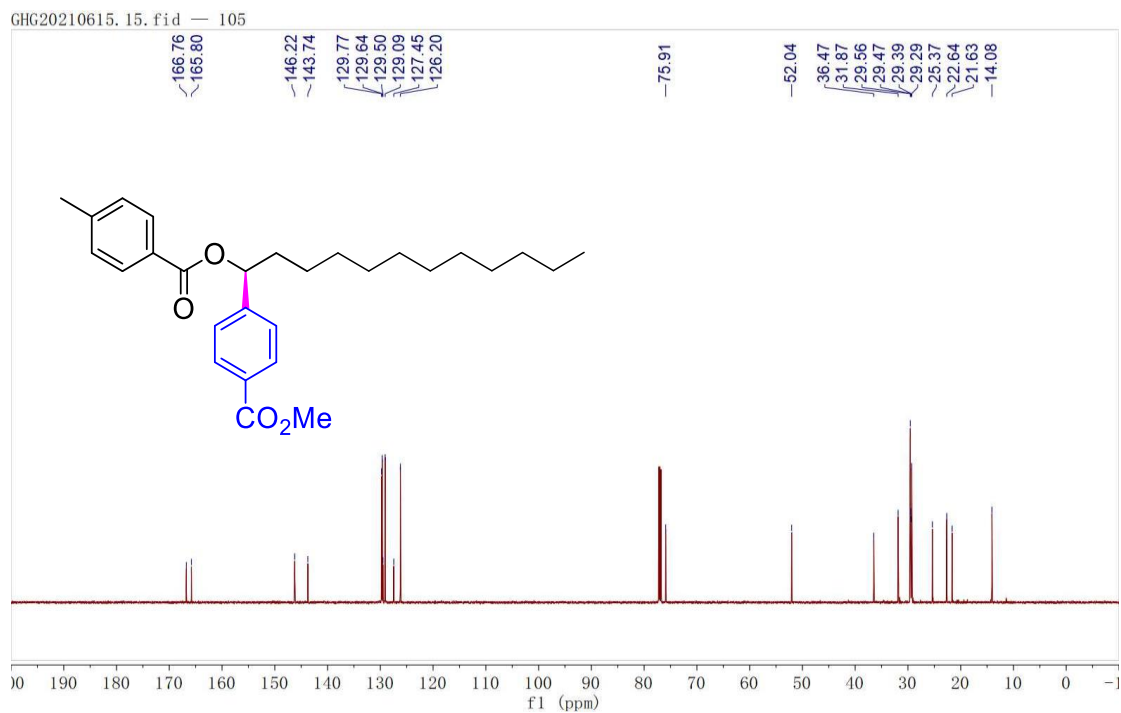



### 14, <sup>1</sup>H-NMR (600 MHz, CDCl<sub>3</sub>)

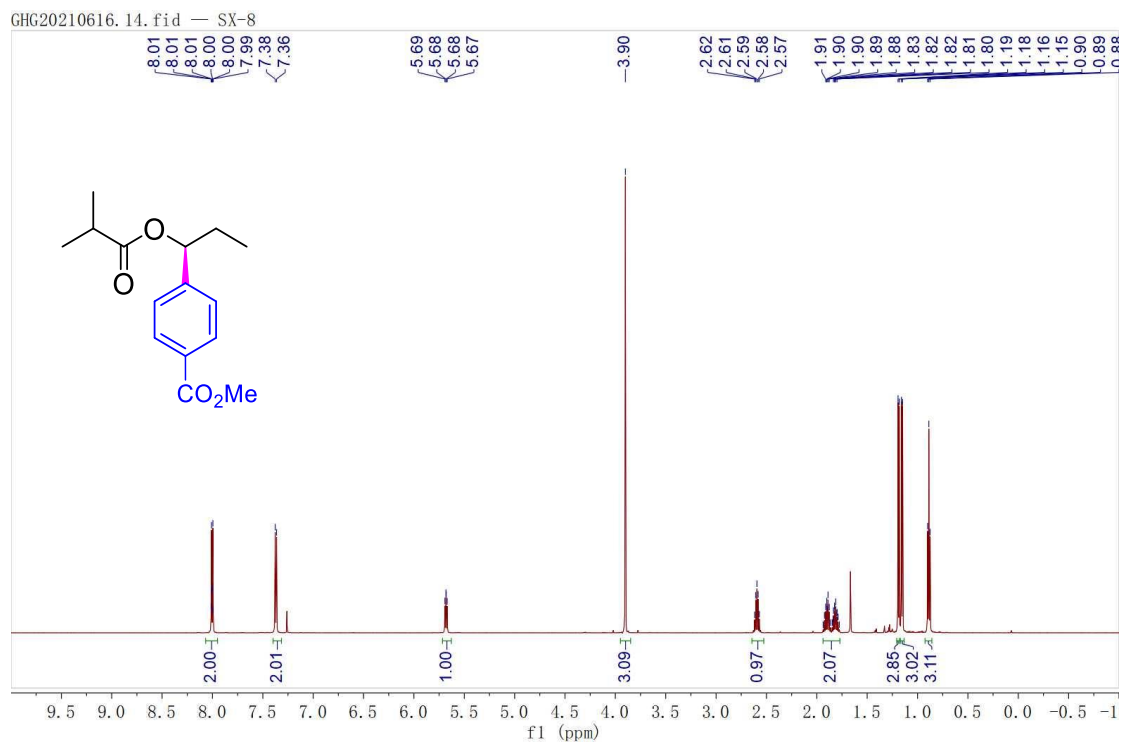

### 14, <sup>13</sup>C NMR (151 MHz, CDCl<sub>3</sub>)

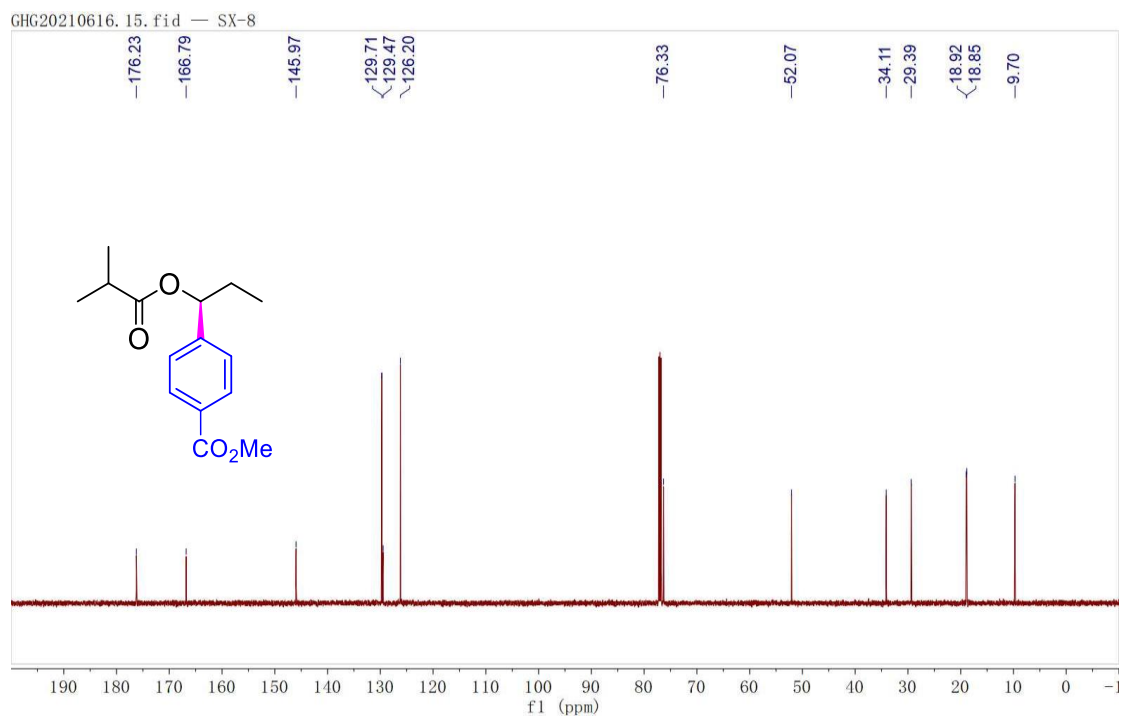

15, <sup>1</sup>H-NMR (600 MHz, CDCl<sub>3</sub>)

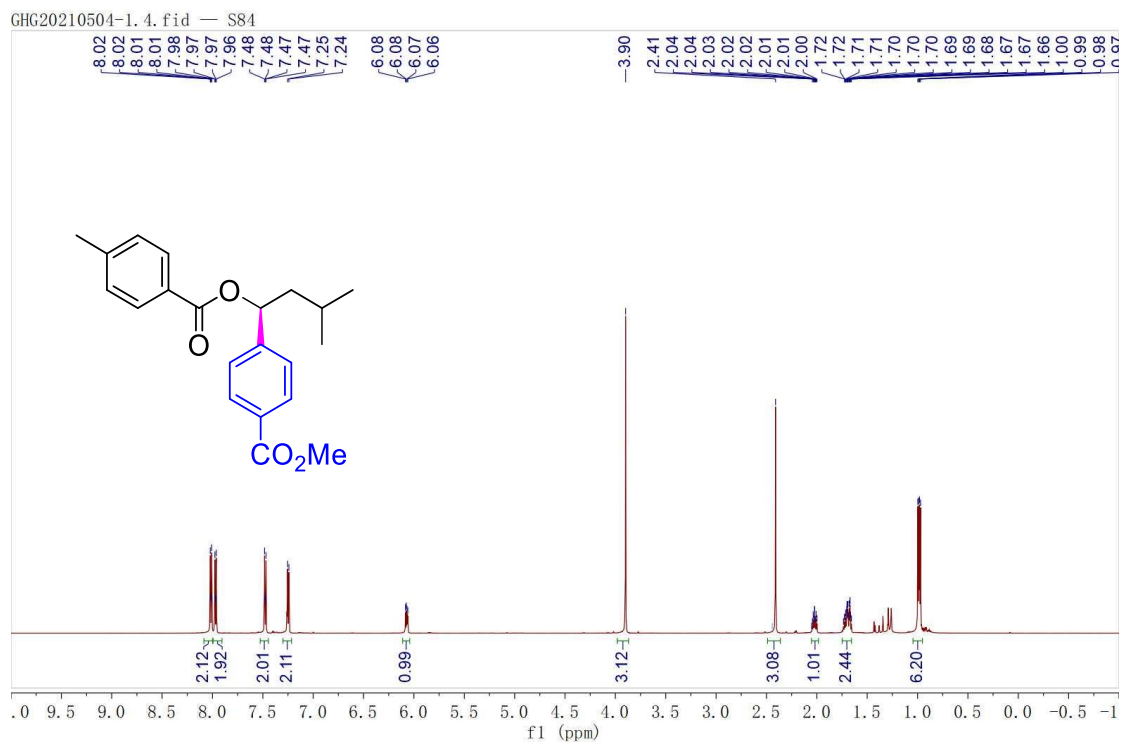

15, <sup>13</sup>C NMR (151 MHz, CDCl<sub>3</sub>)

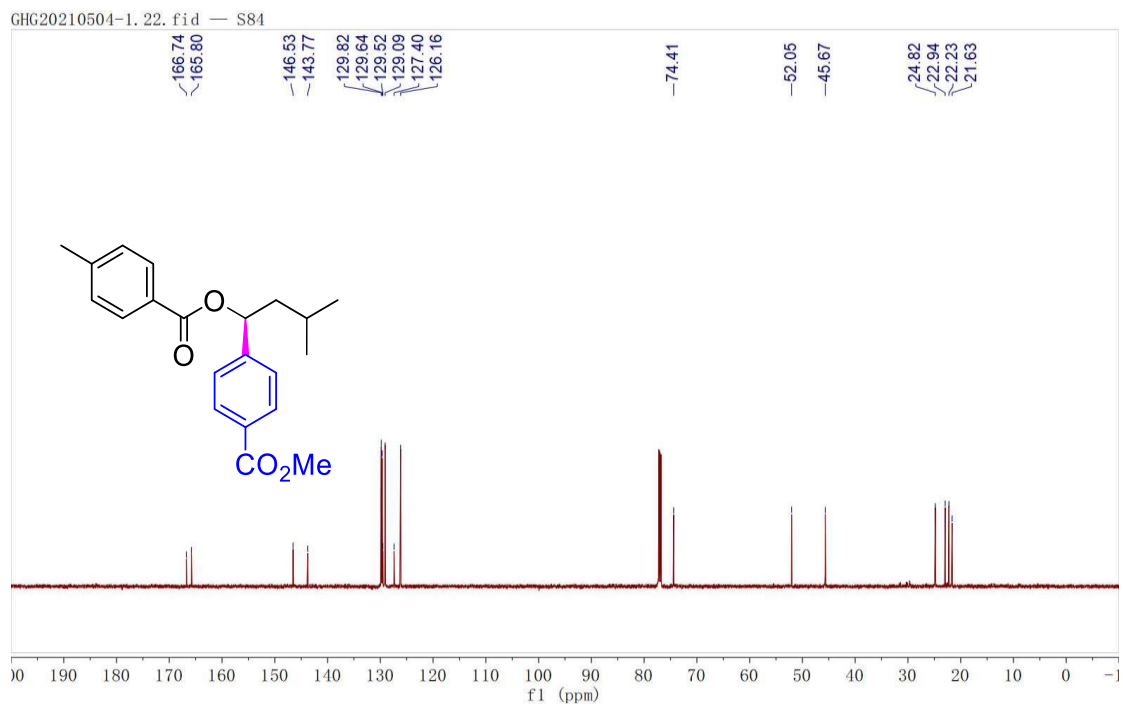

16, <sup>1</sup>H-NMR (600 MHz, CDCl<sub>3</sub>)

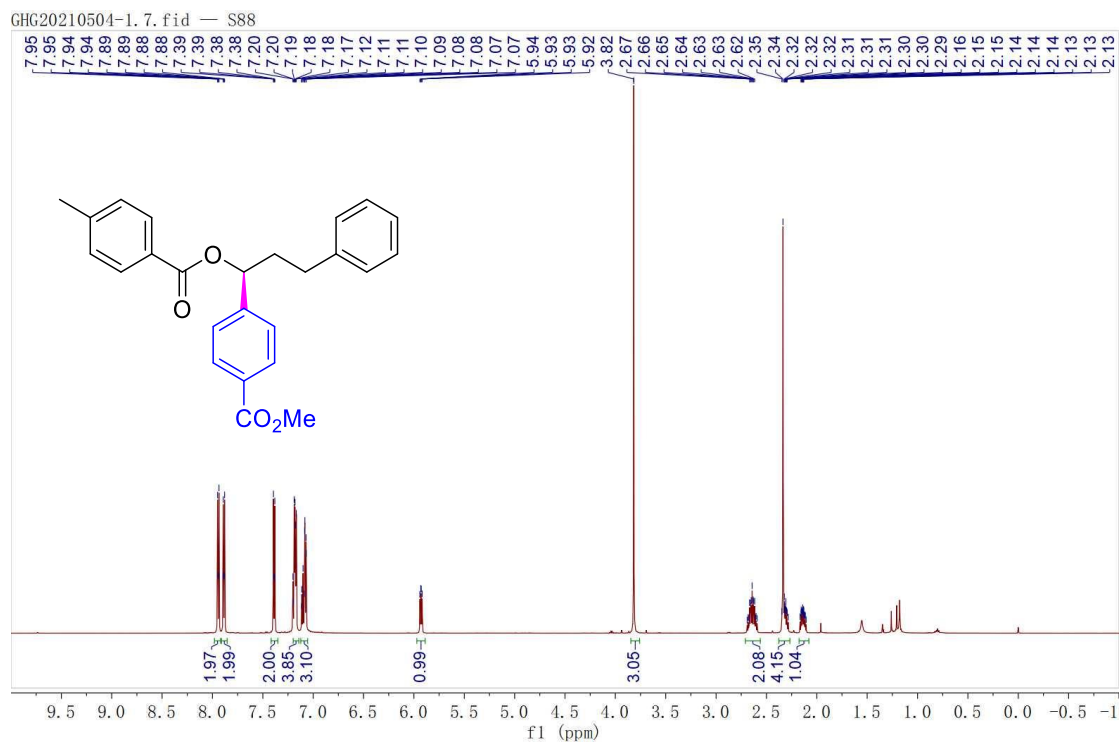

16, <sup>13</sup>C NMR (151 MHz, CDCl<sub>3</sub>)

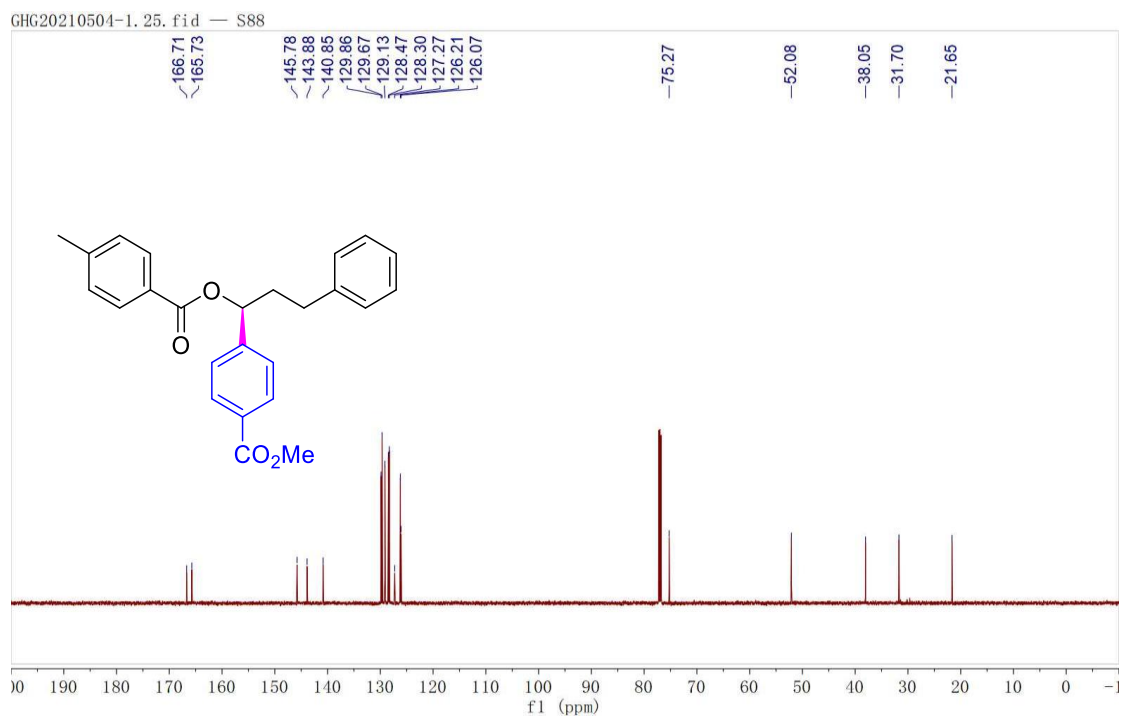

17, <sup>1</sup>H-NMR (600 MHz, CDCl<sub>3</sub>)

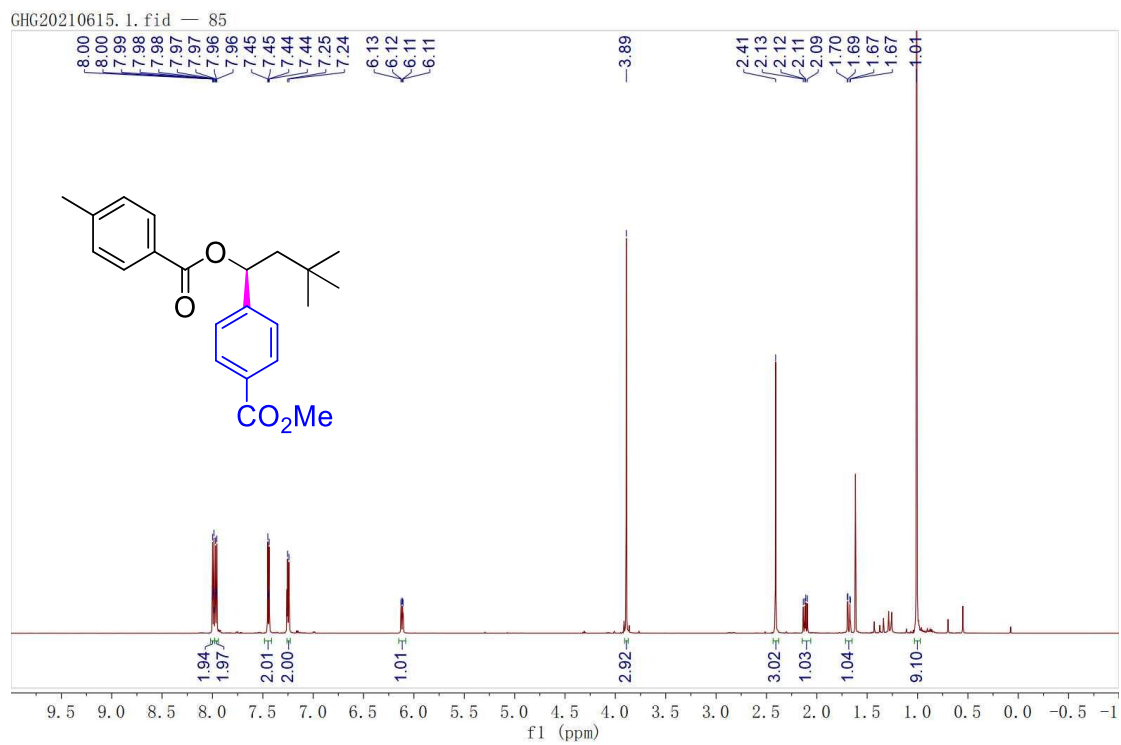

17, <sup>13</sup>C NMR (151 MHz, CDCl<sub>3</sub>)

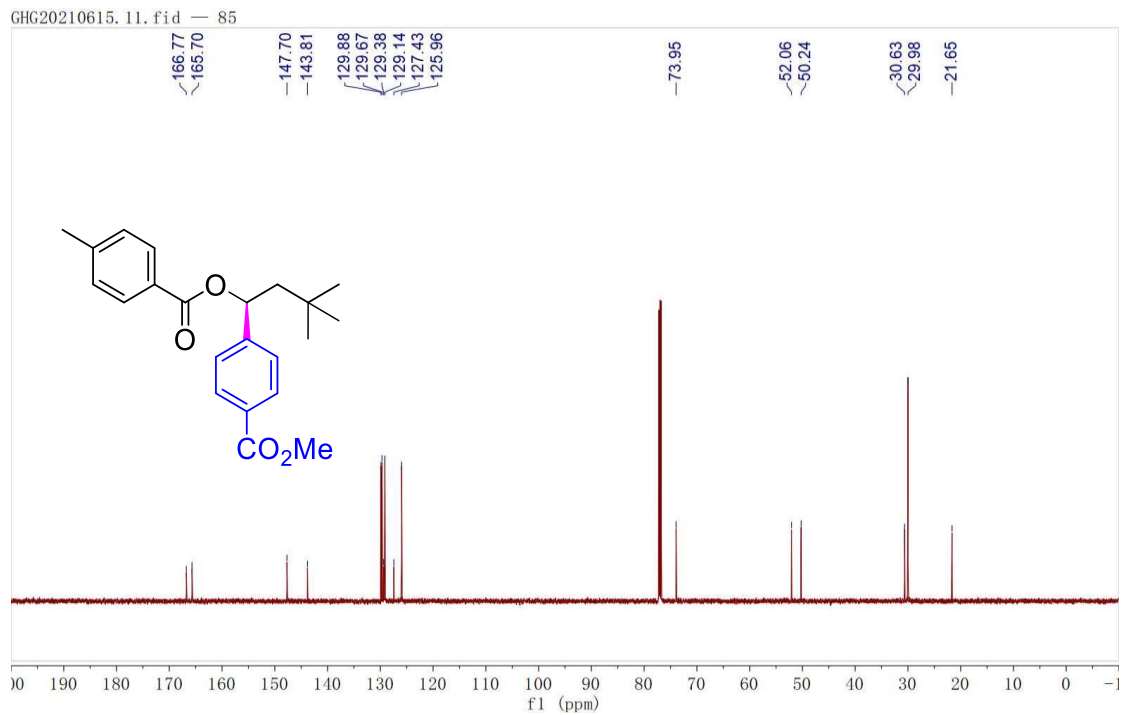

### 18, <sup>1</sup>H-NMR (600 MHz, CDCl<sub>3</sub>)

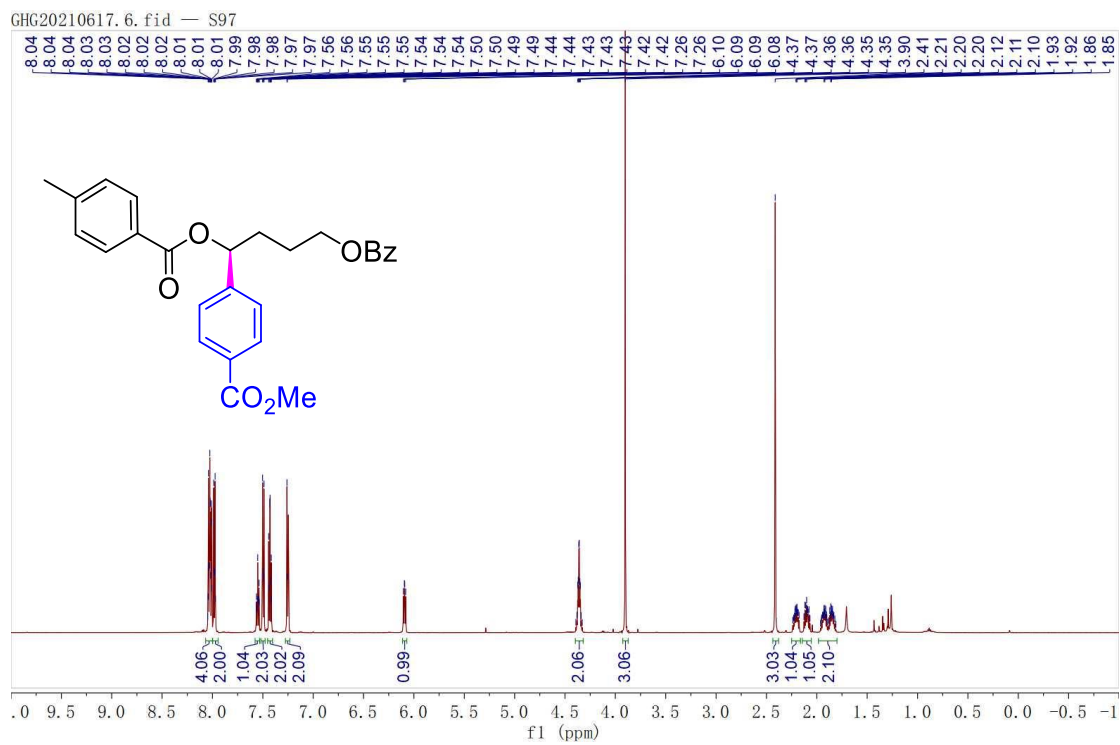

### 18, <sup>13</sup>C NMR (151 MHz, CDCl<sub>3</sub>)

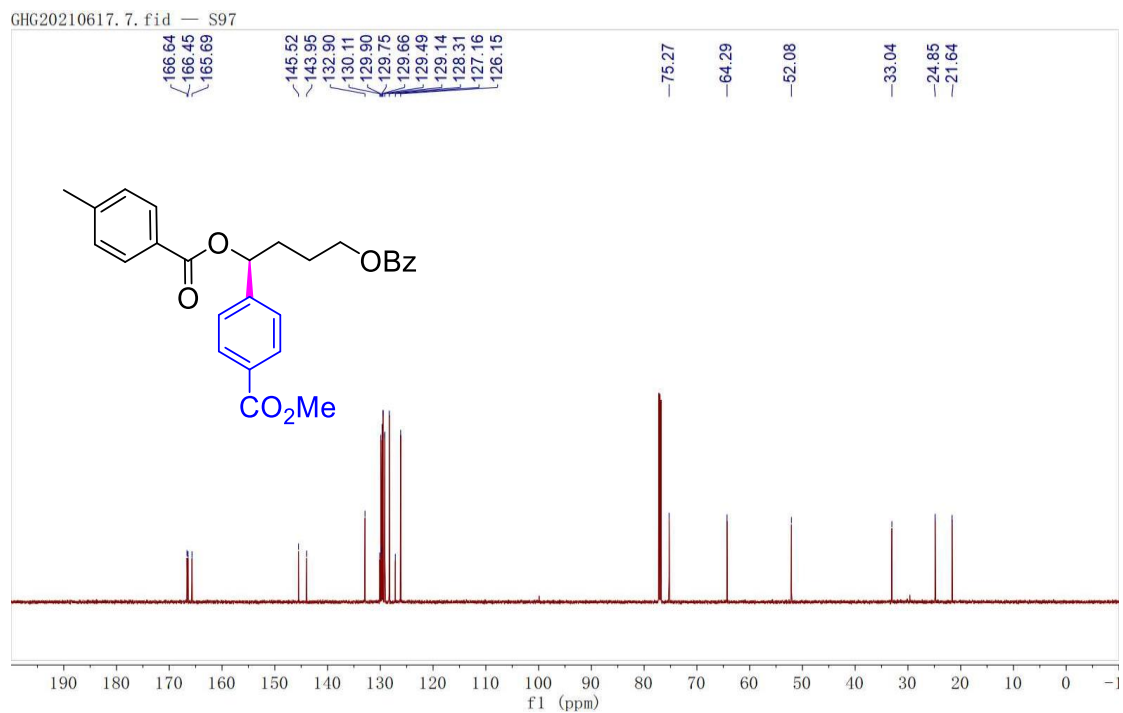

### 19, <sup>1</sup>H-NMR (600 MHz, CDCl<sub>3</sub>)

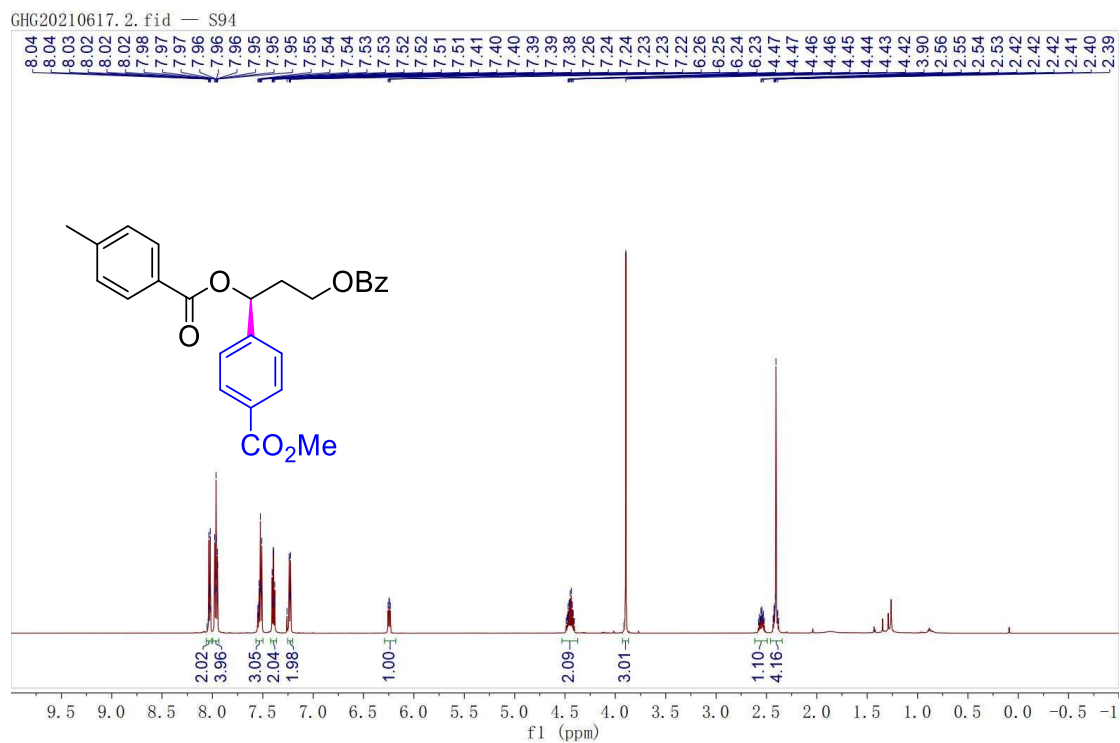

### 19, <sup>13</sup>C NMR (151 MHz, CDCl<sub>3</sub>)

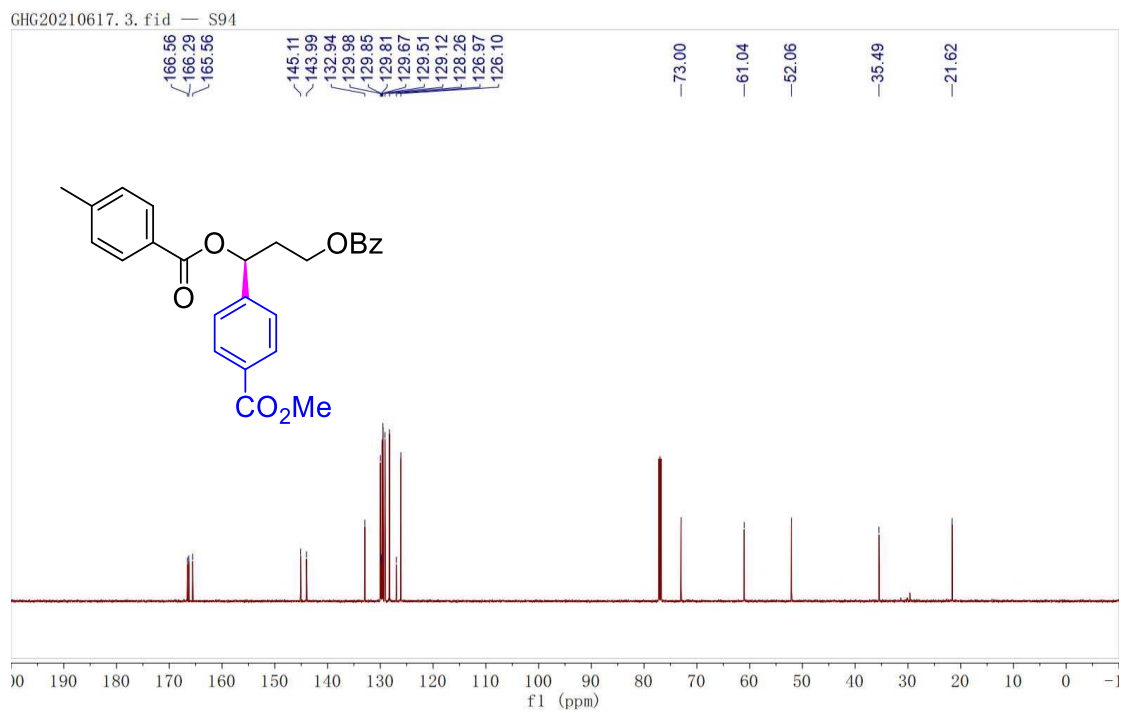

20, <sup>1</sup>H-NMR (600 MHz, CDCl<sub>3</sub>)

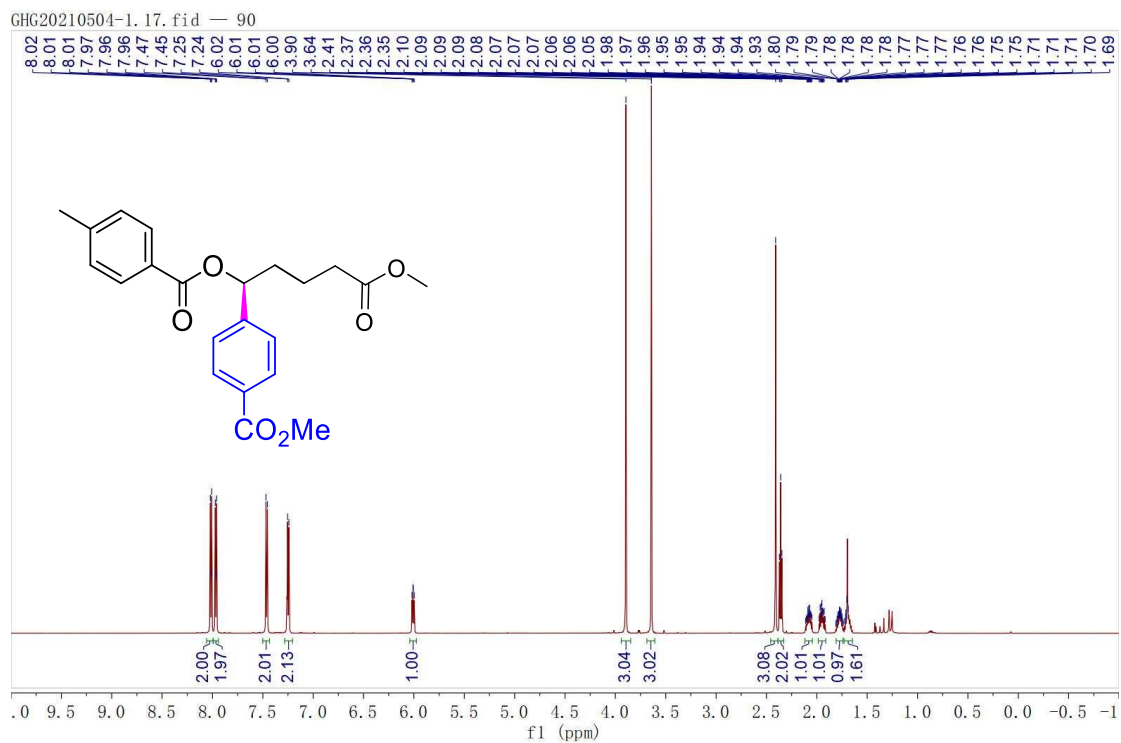

20, <sup>13</sup>C NMR (151 MHz, CDCl<sub>3</sub>)

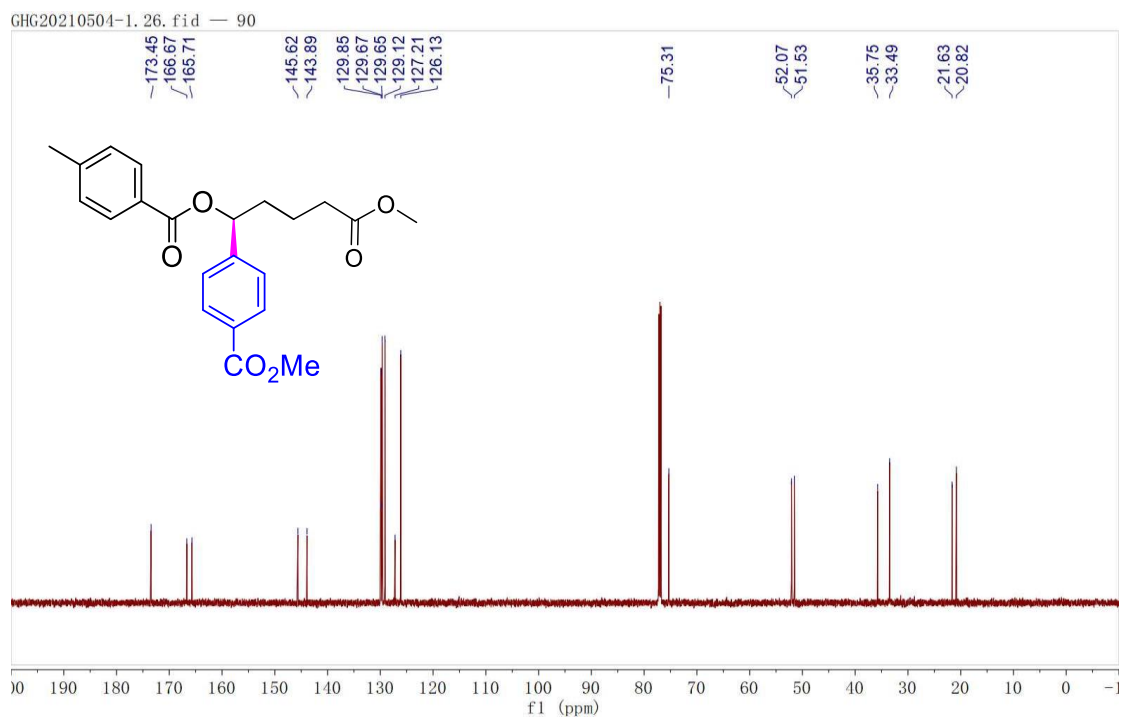

21, <sup>1</sup>H-NMR (600 MHz, CDCl<sub>3</sub>)

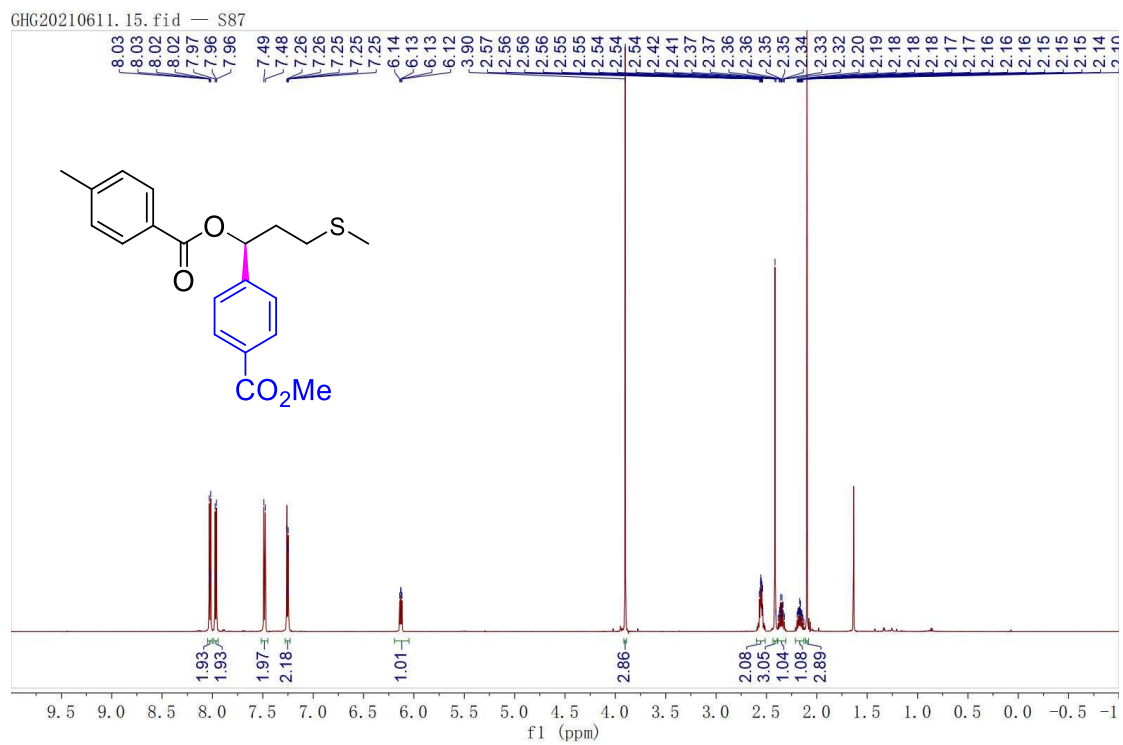

21, <sup>13</sup>C NMR (151 MHz, CDCl<sub>3</sub>)

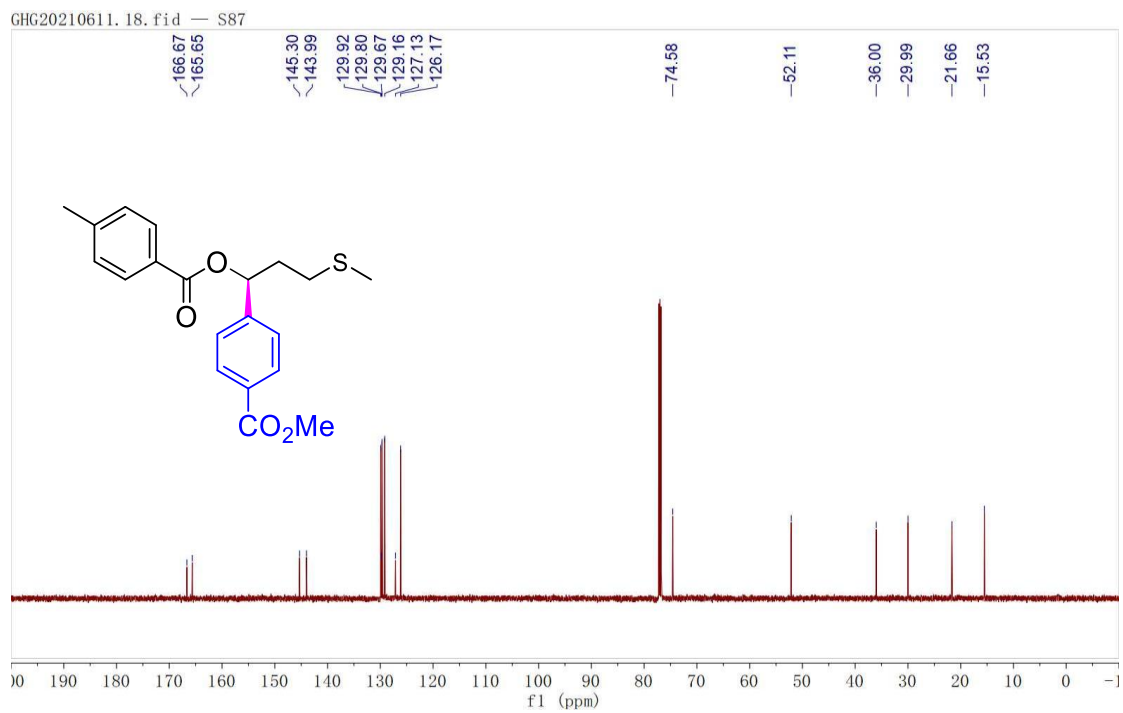



22, <sup>1</sup>H-NMR (600 MHz, CDCl<sub>3</sub>)

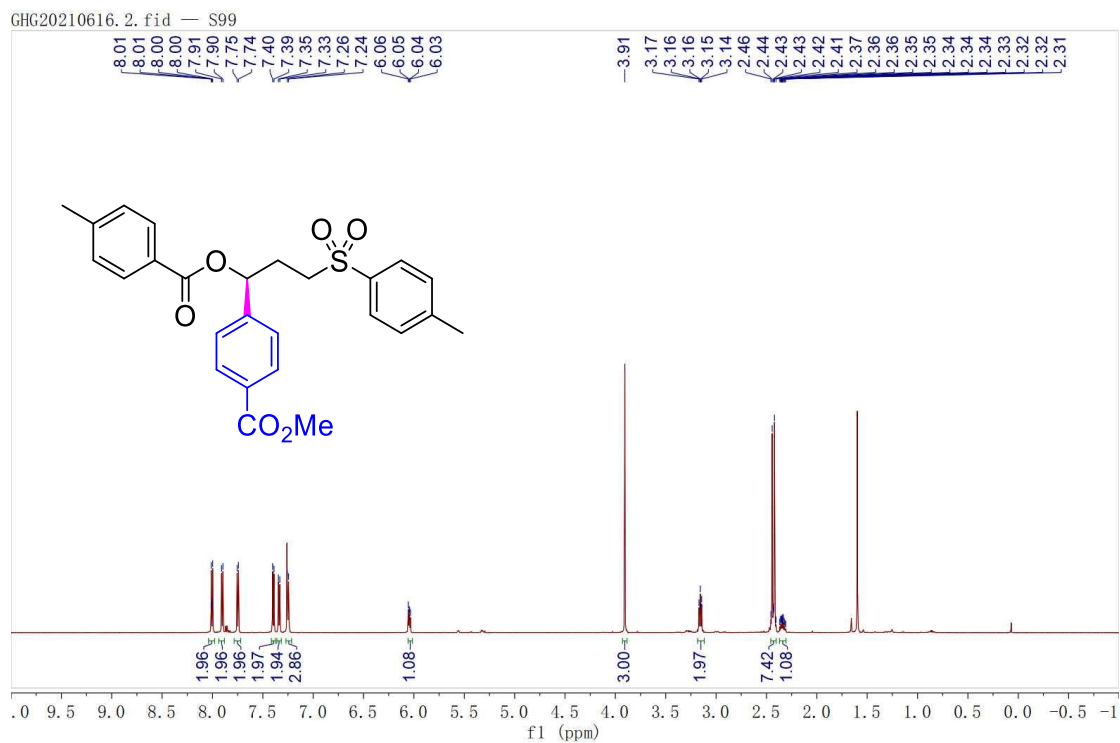

22, <sup>13</sup>C NMR (151 MHz, CDCl<sub>3</sub>)

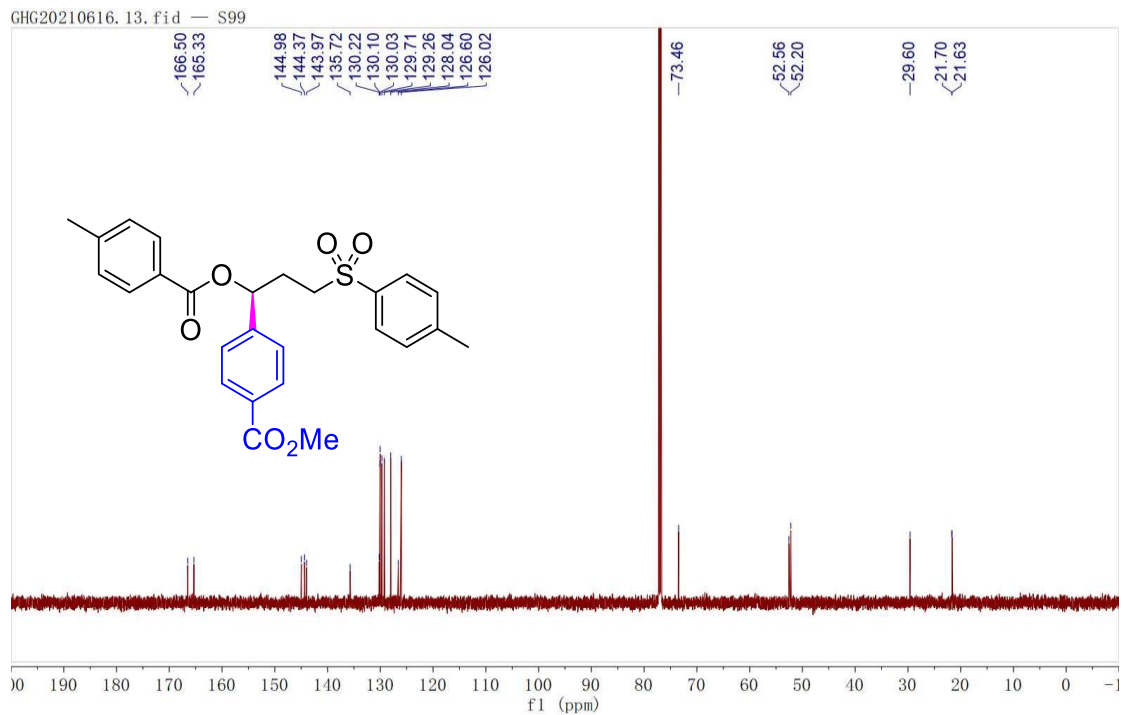

23, <sup>1</sup>H-NMR (600 MHz, CDCl<sub>3</sub>)

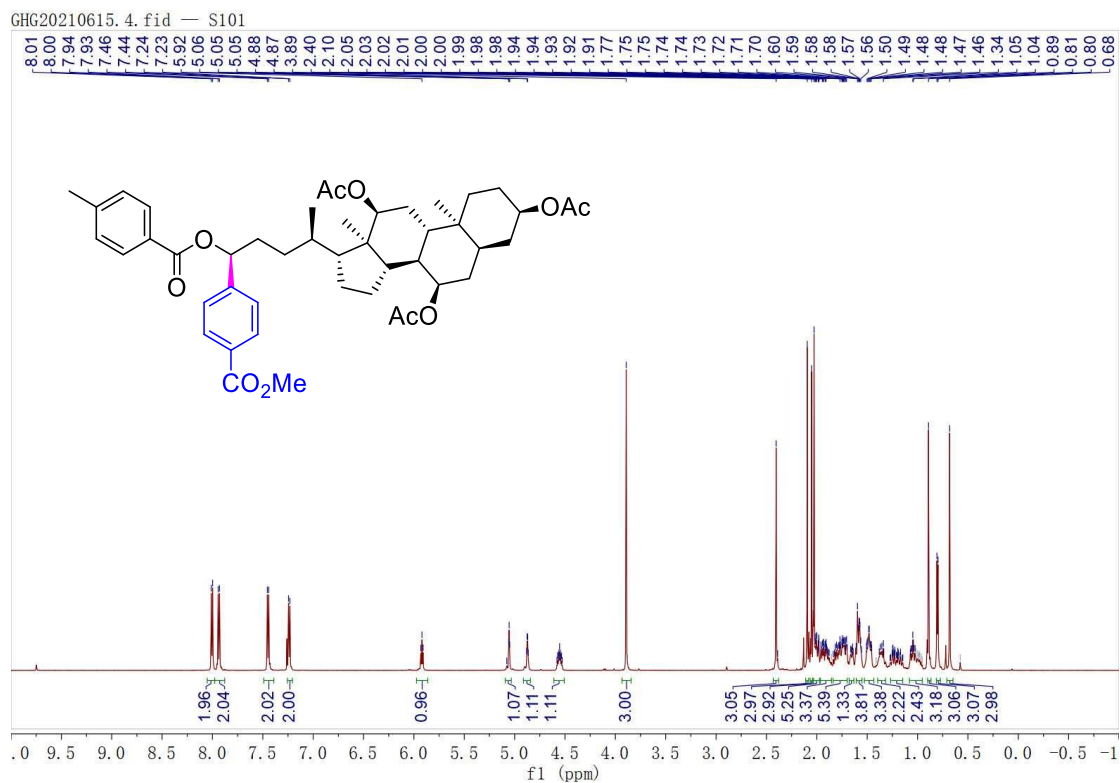

23, <sup>13</sup>C NMR (151 MHz, CDCl<sub>3</sub>)

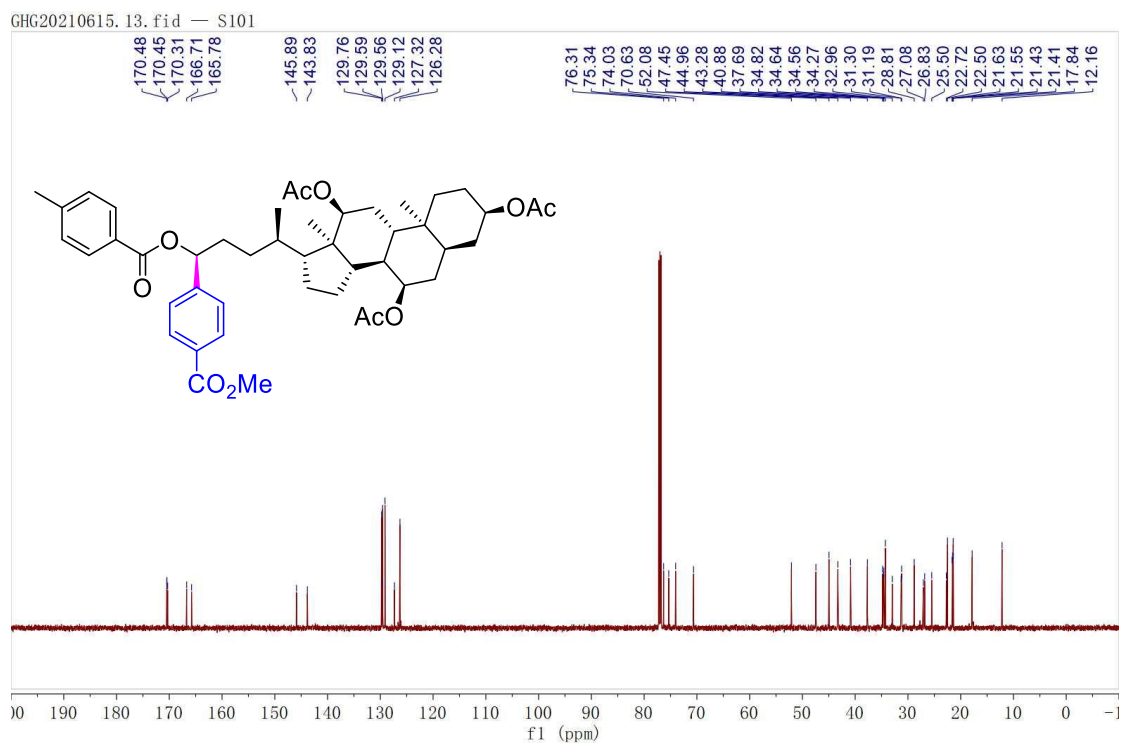

24, <sup>1</sup>H-NMR (600 MHz, CDCl<sub>3</sub>)

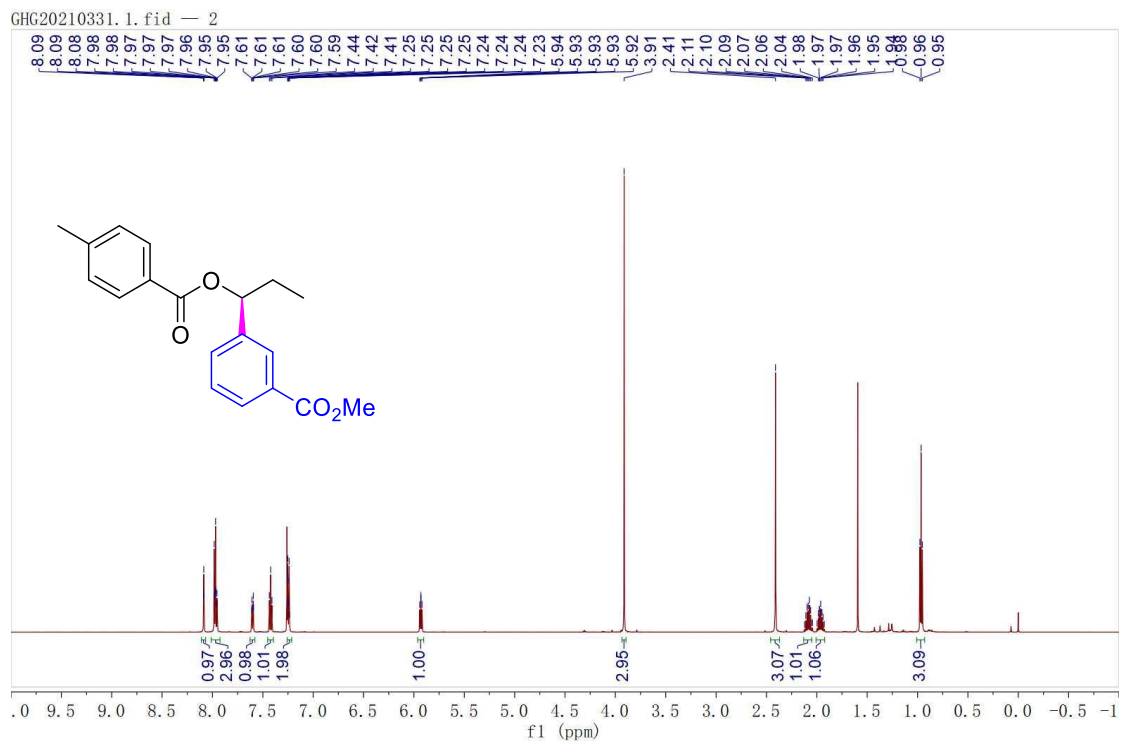

24, <sup>13</sup>C NMR (151 MHz, CDCl<sub>3</sub>)

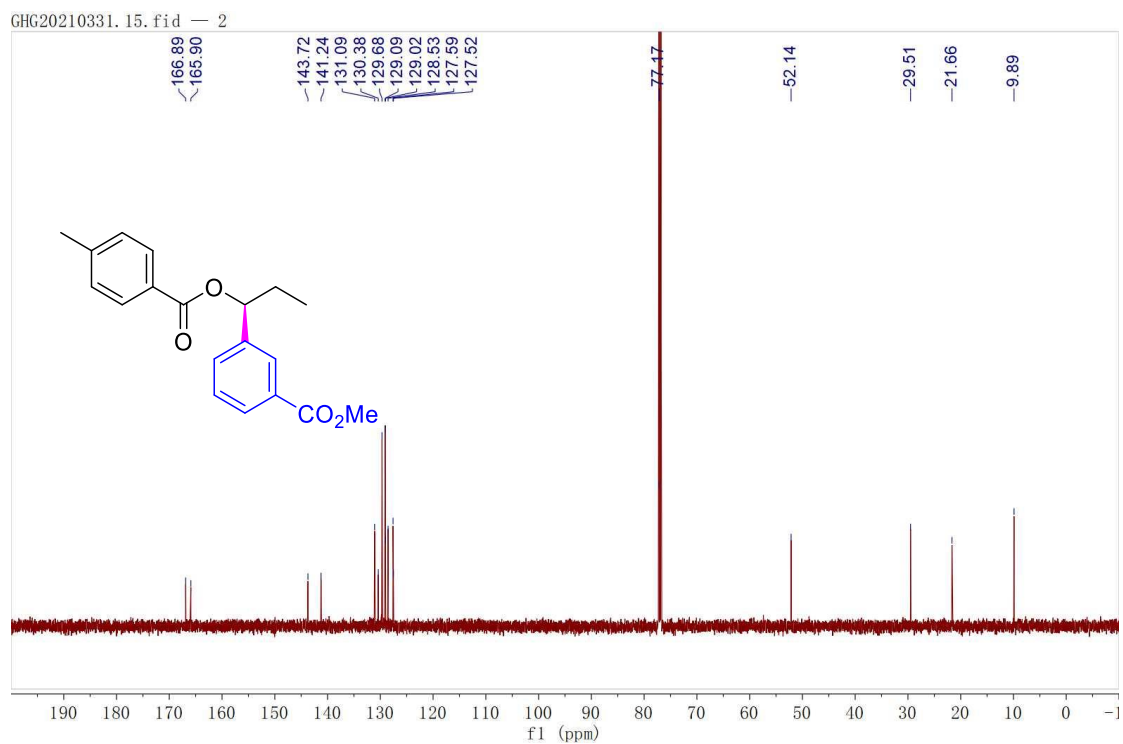

25, <sup>1</sup>H-NMR (400 MHz, CDCl<sub>3</sub>)

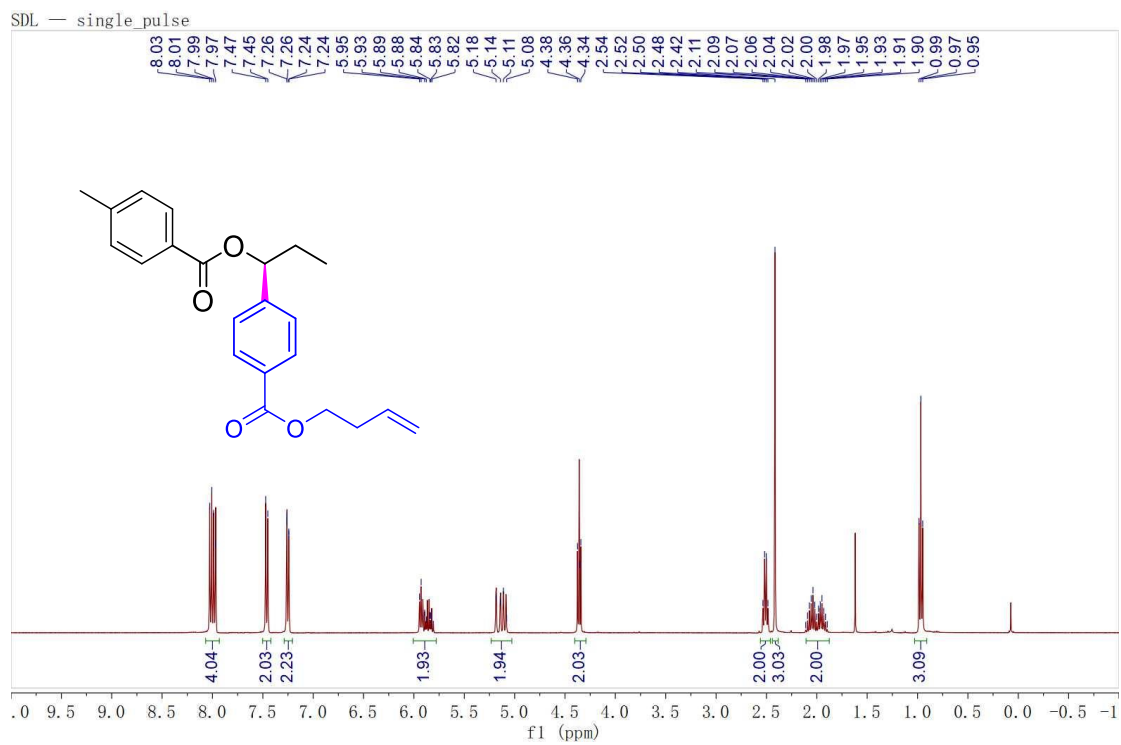

25, <sup>13</sup>C NMR (101 MHz, CDCl<sub>3</sub>)

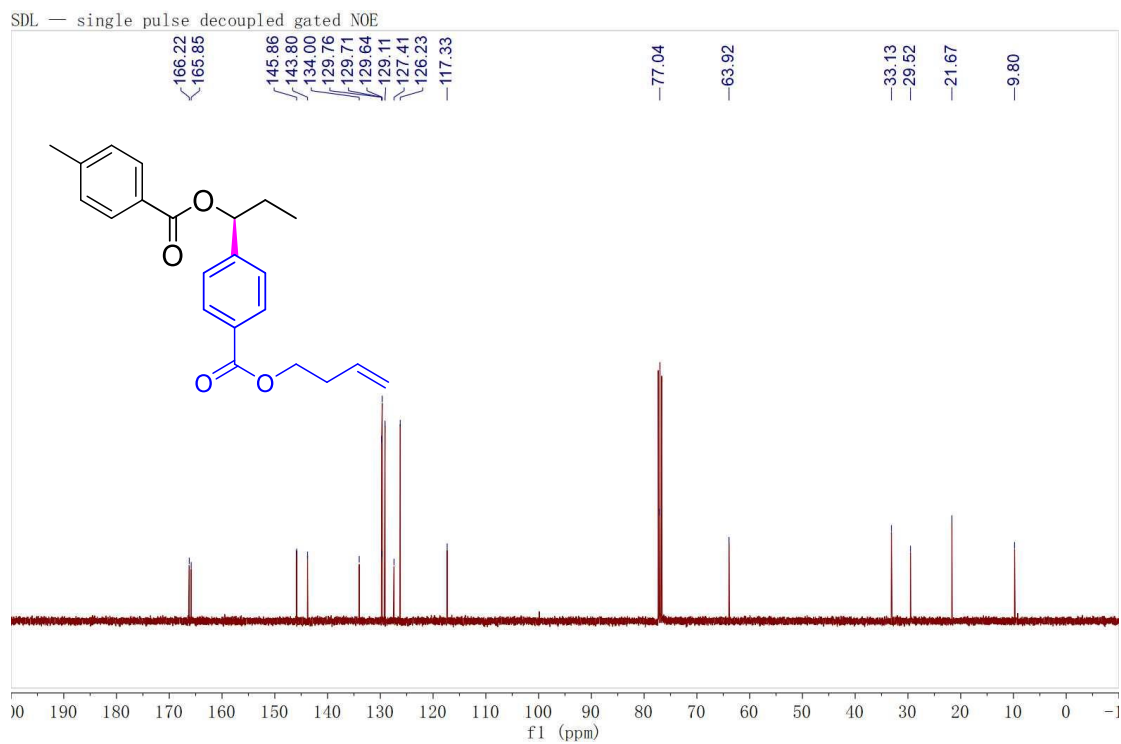

26, <sup>1</sup>H-NMR (400 MHz, CDCl<sub>3</sub>)

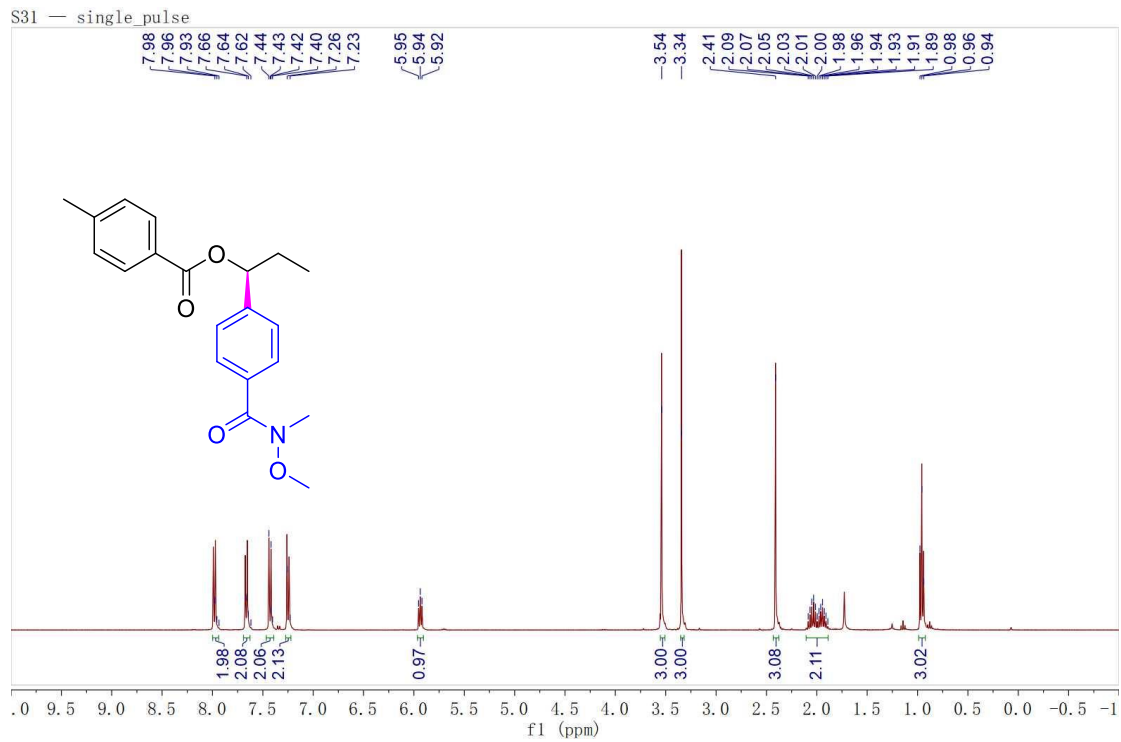

26, <sup>13</sup>C NMR (101 MHz, CDCl<sub>3</sub>)

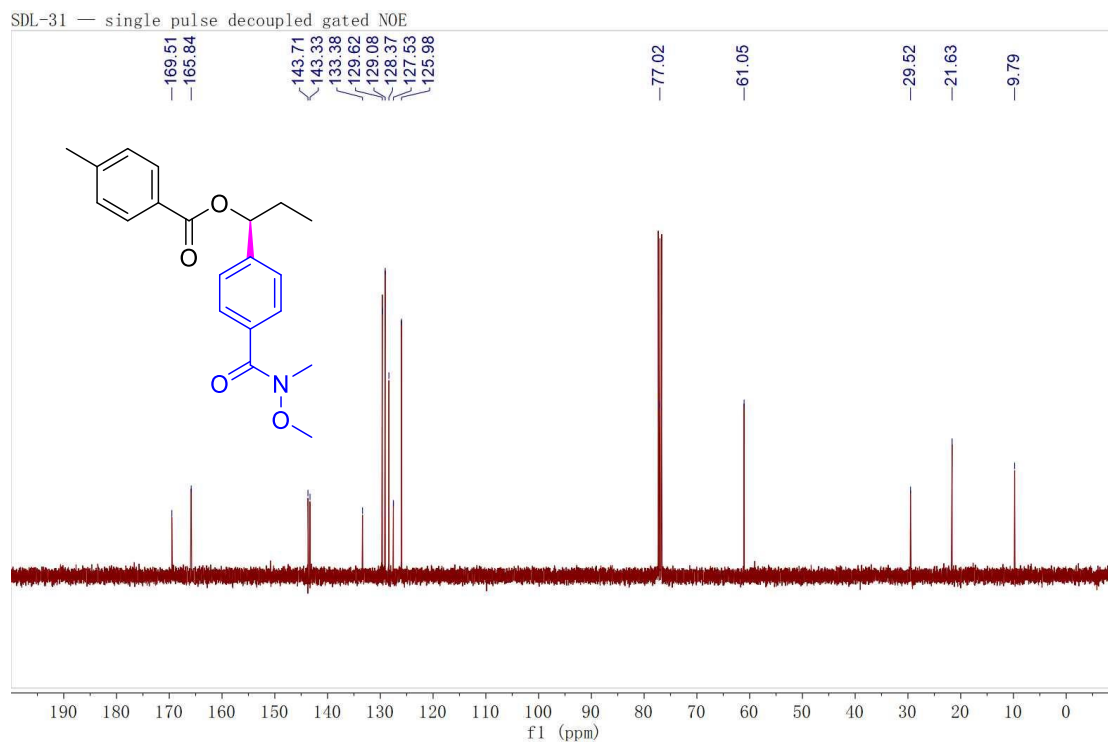

### 27, <sup>1</sup>H-NMR (600 MHz, CDCl<sub>3</sub>)

GHG20210402.22.fid — 27

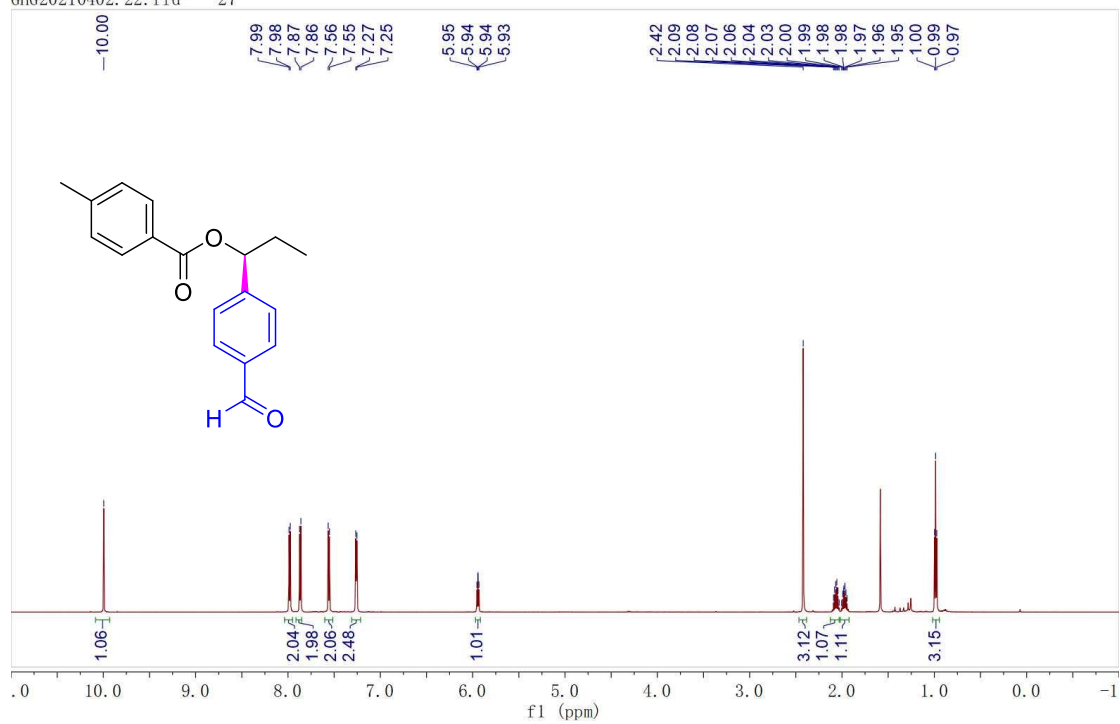

### 27, <sup>13</sup>C NMR (151 MHz, CDCl<sub>3</sub>)

GHG20210402.32.fid — 27

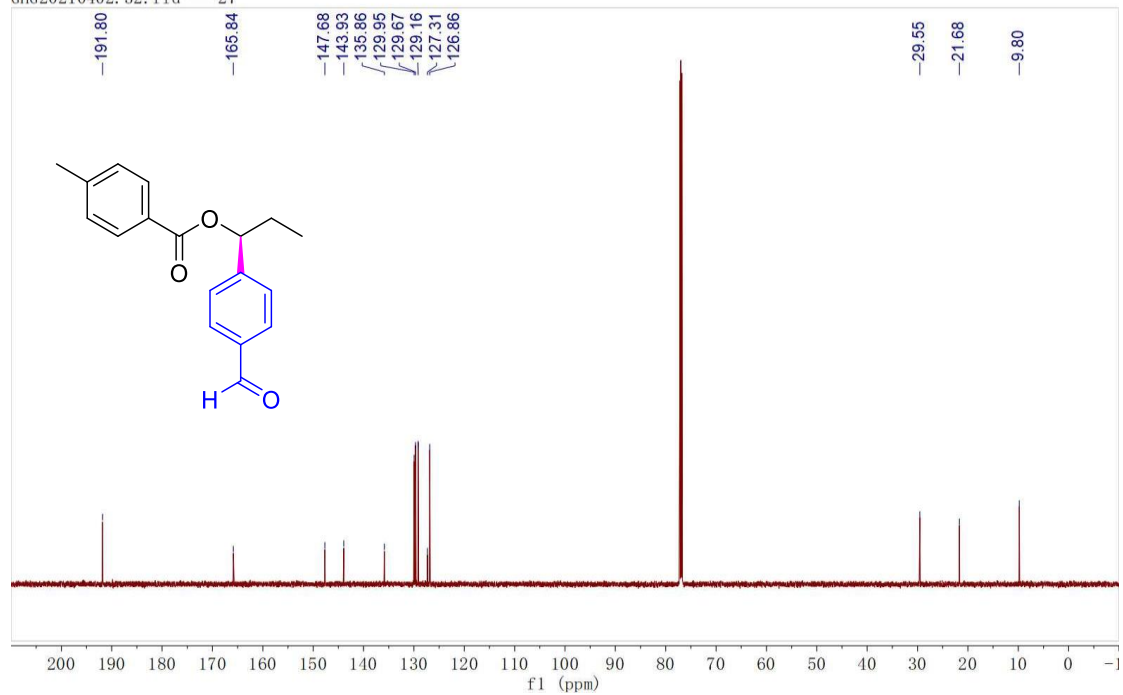

28, <sup>1</sup>H-NMR (600 MHz, CDCl<sub>3</sub>)

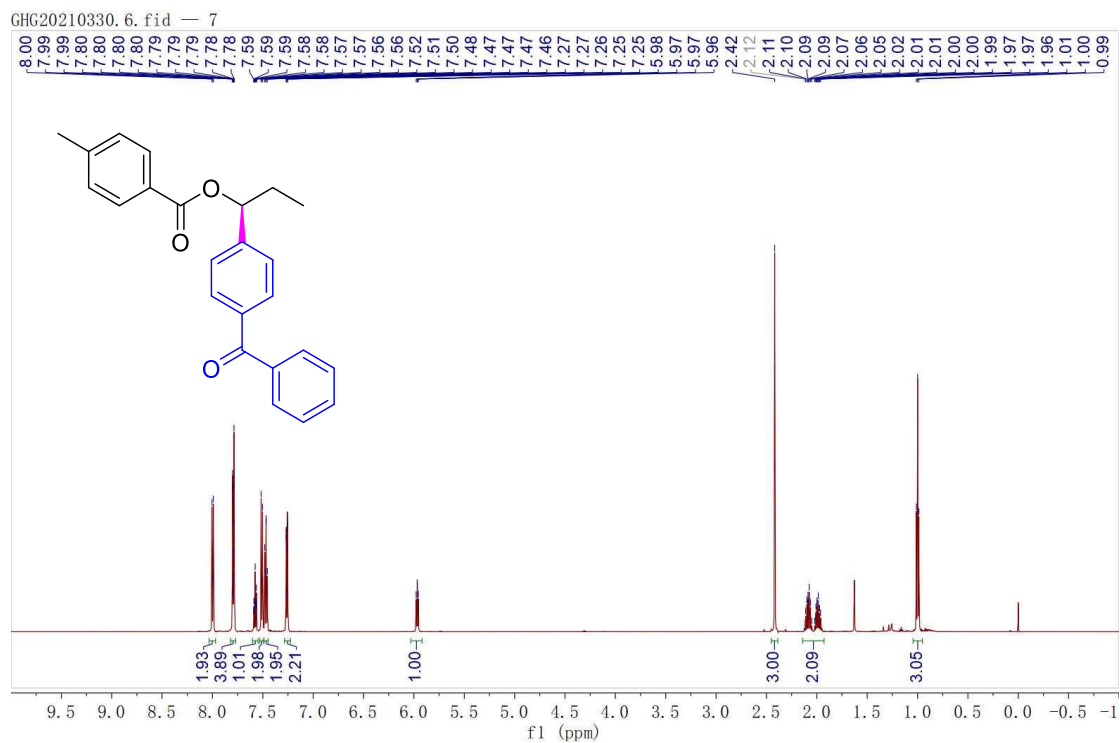

28, <sup>13</sup>C NMR (101 MHz, CDCl<sub>3</sub>)

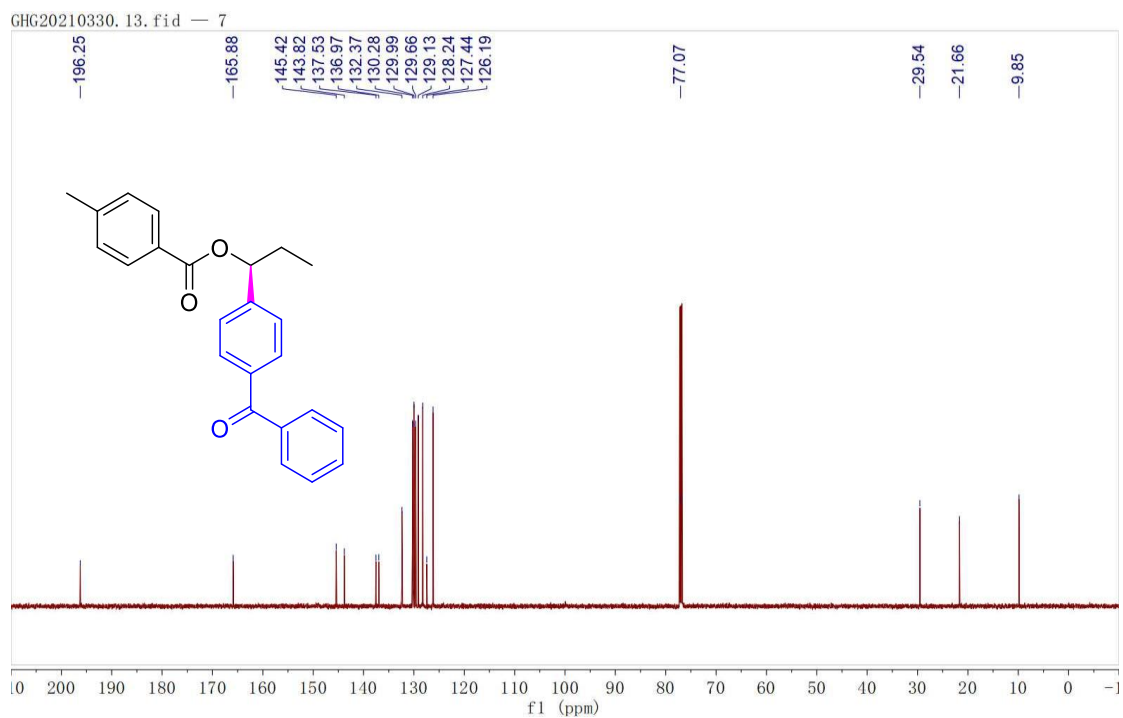

29, <sup>1</sup>H-NMR (600 MHz, CDCl<sub>3</sub>)

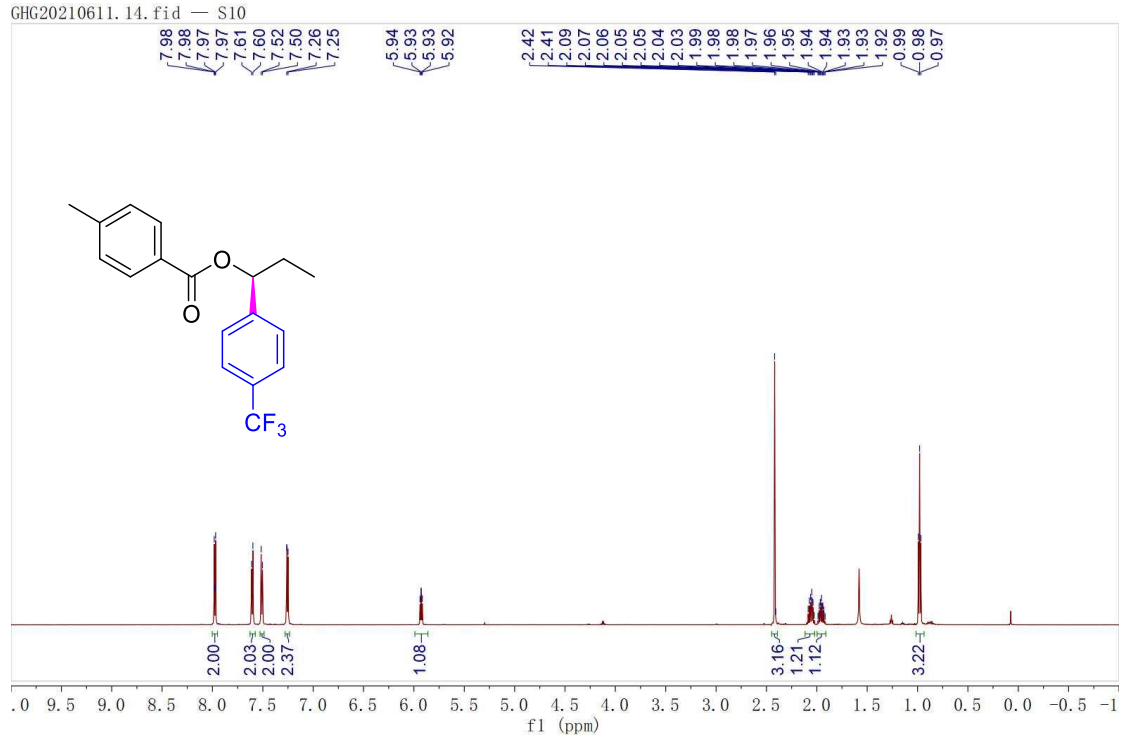

29, <sup>13</sup>C NMR (151 MHz, CDCl<sub>3</sub>)

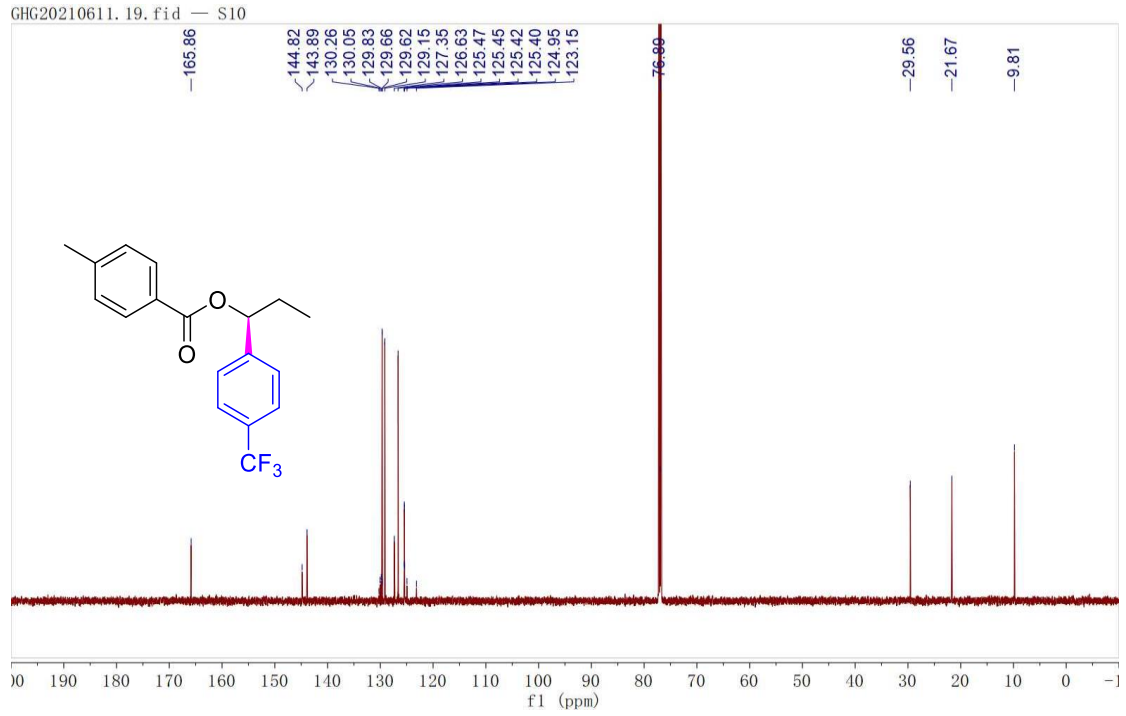



29, <sup>19</sup>F NMR (565 MHz, CDCl<sub>3</sub>)

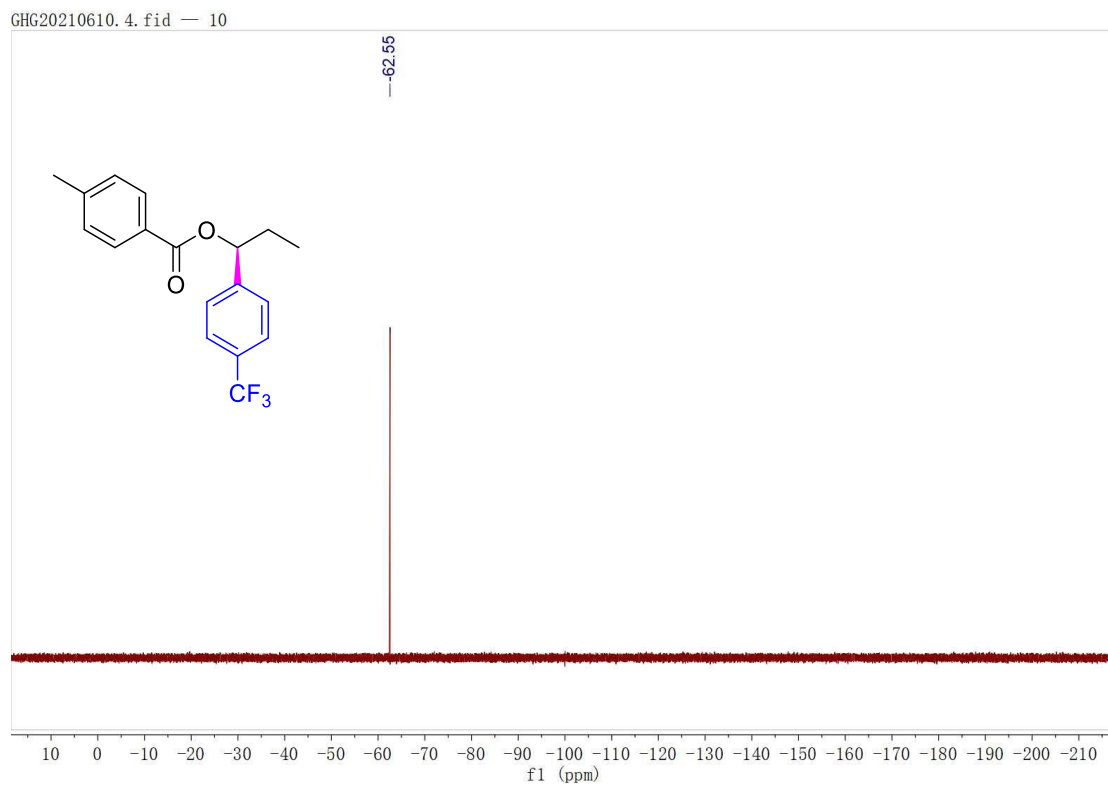

30, <sup>1</sup>H-NMR (600 MHz, CDCl<sub>3</sub>)

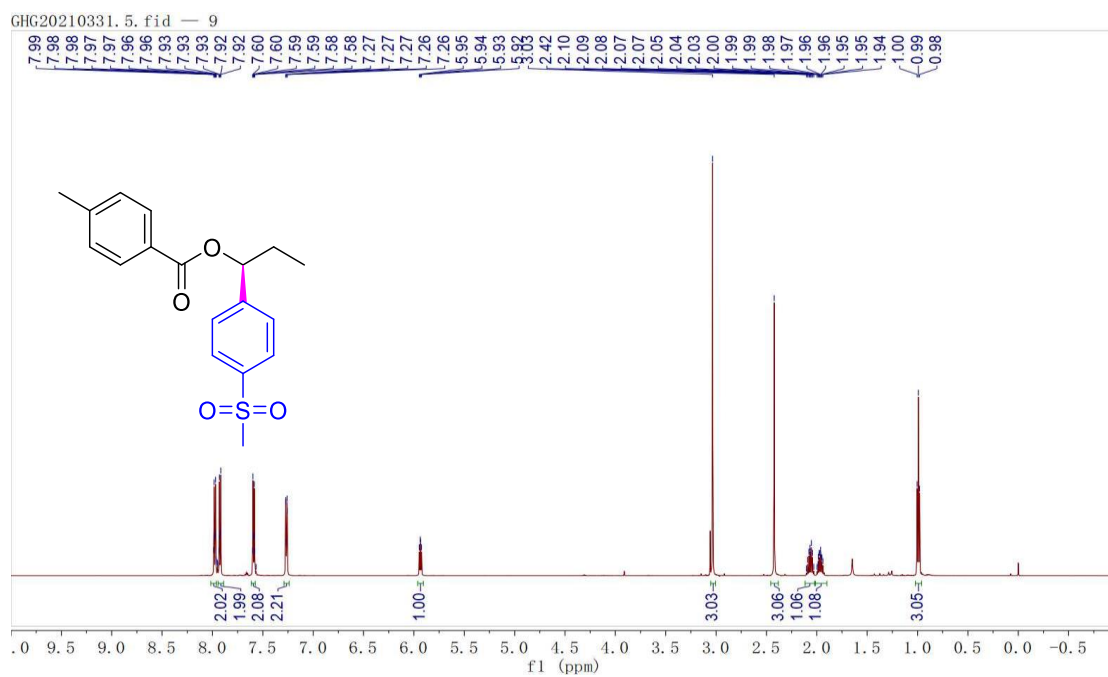

### 30, $^{13}\text{C}$ NMR (151 MHz, $\text{CDCl}_3$ )

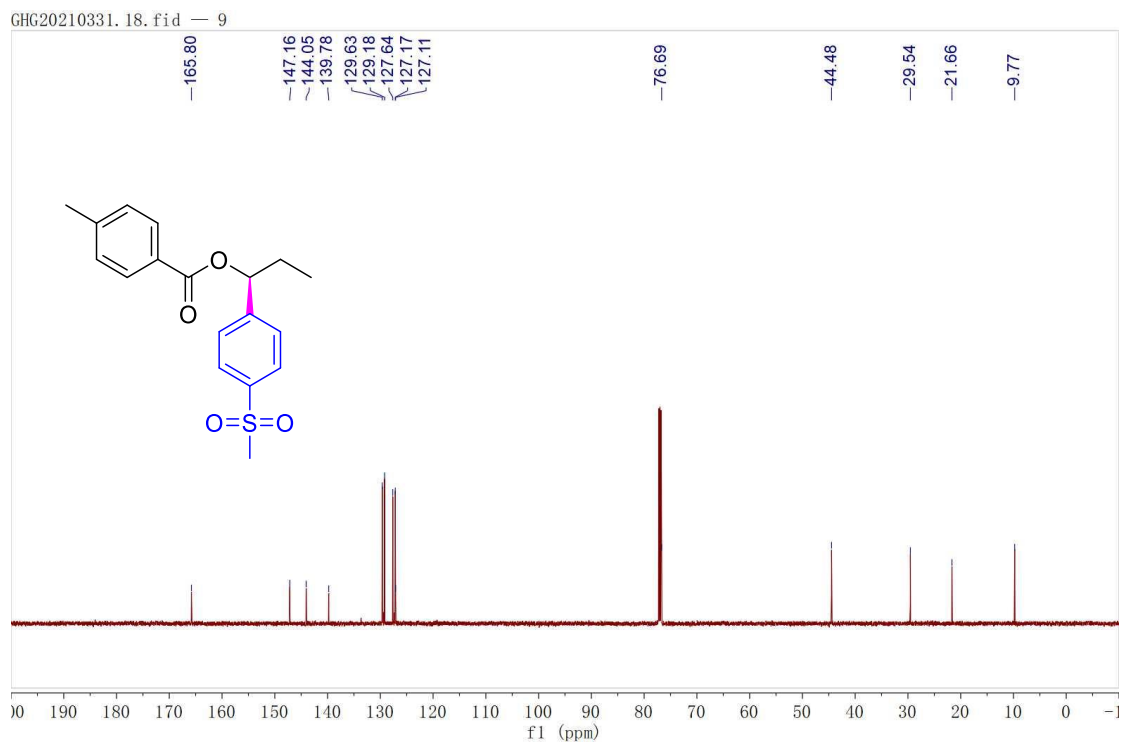

### 31, $^1\text{H}$ -NMR (600 MHz, $\text{CDCl}_3$ )

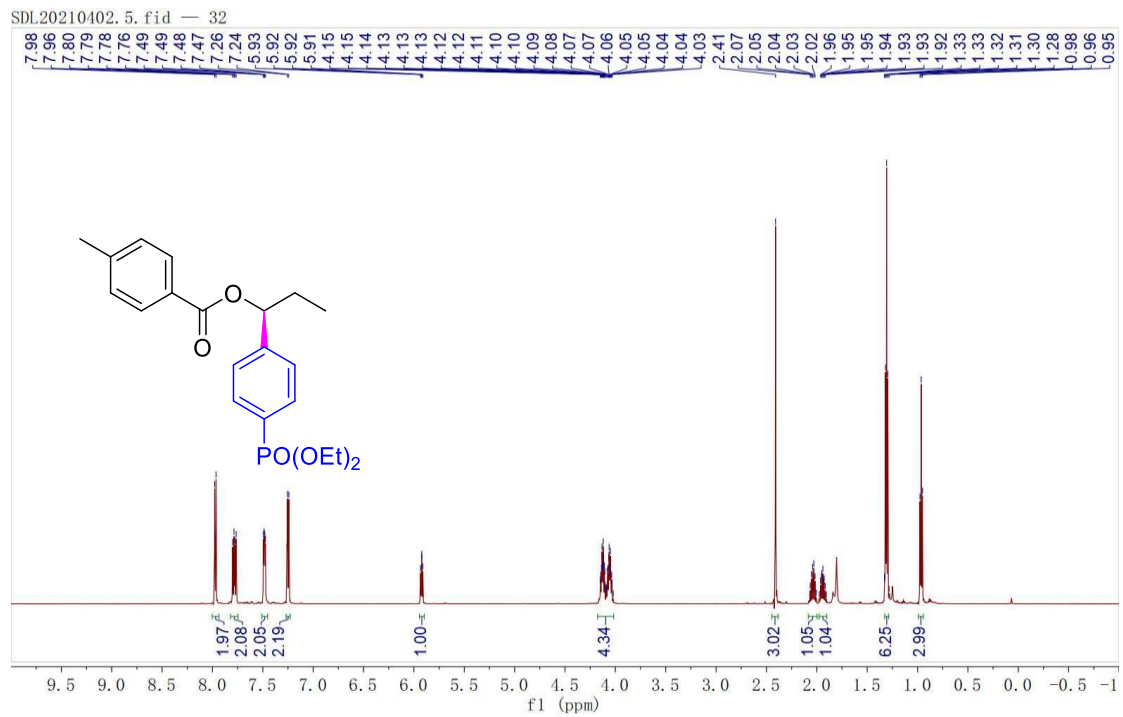

31, <sup>13</sup>C NMR (151 MHz, CDCl<sub>3</sub>)

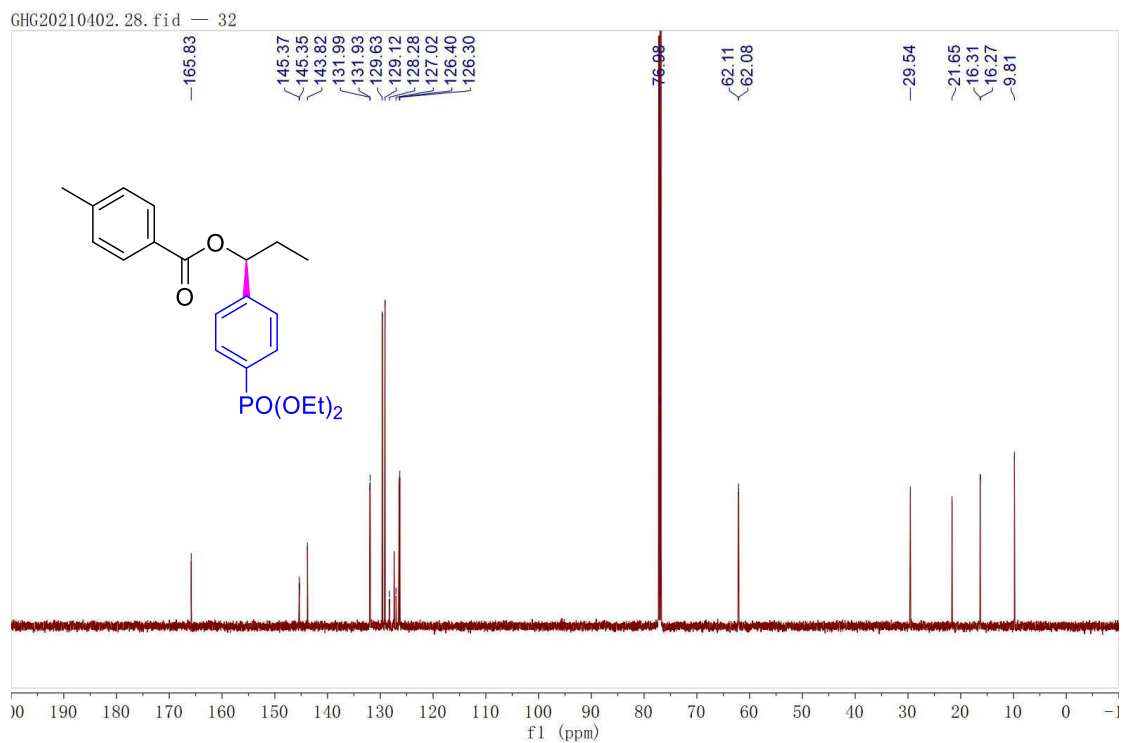

32, <sup>1</sup>H-NMR (600 MHz, CDCl<sub>3</sub>)

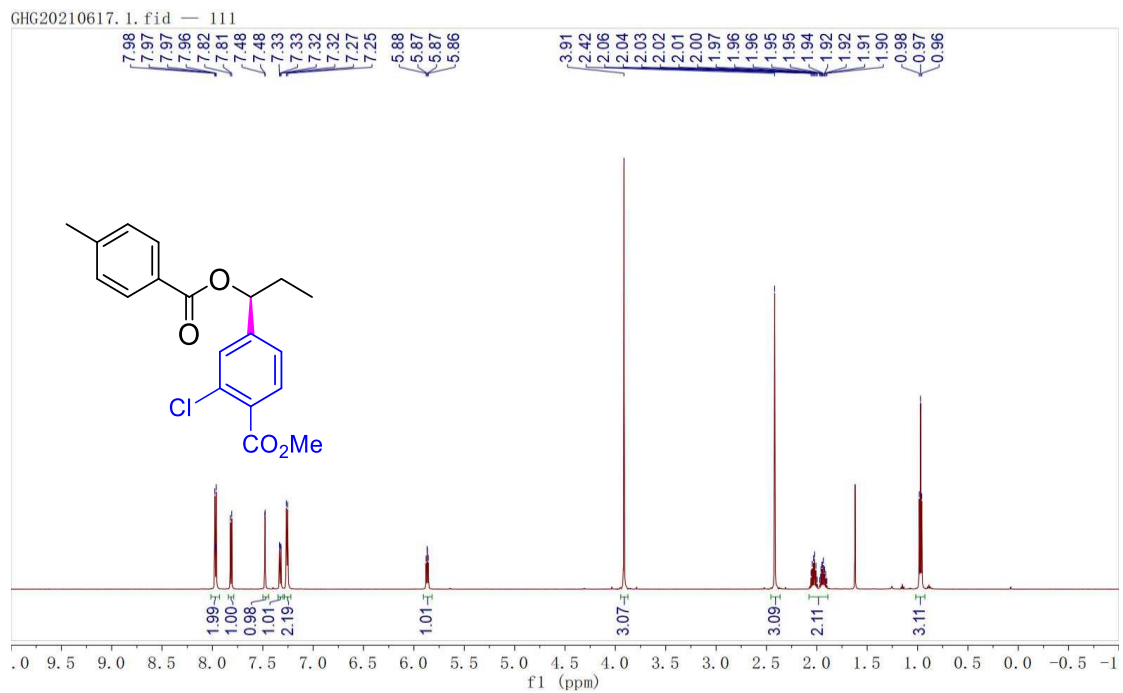

32,  $^{13}\text{C}$  NMR (151 MHz,  $\text{CDCl}_3$ )

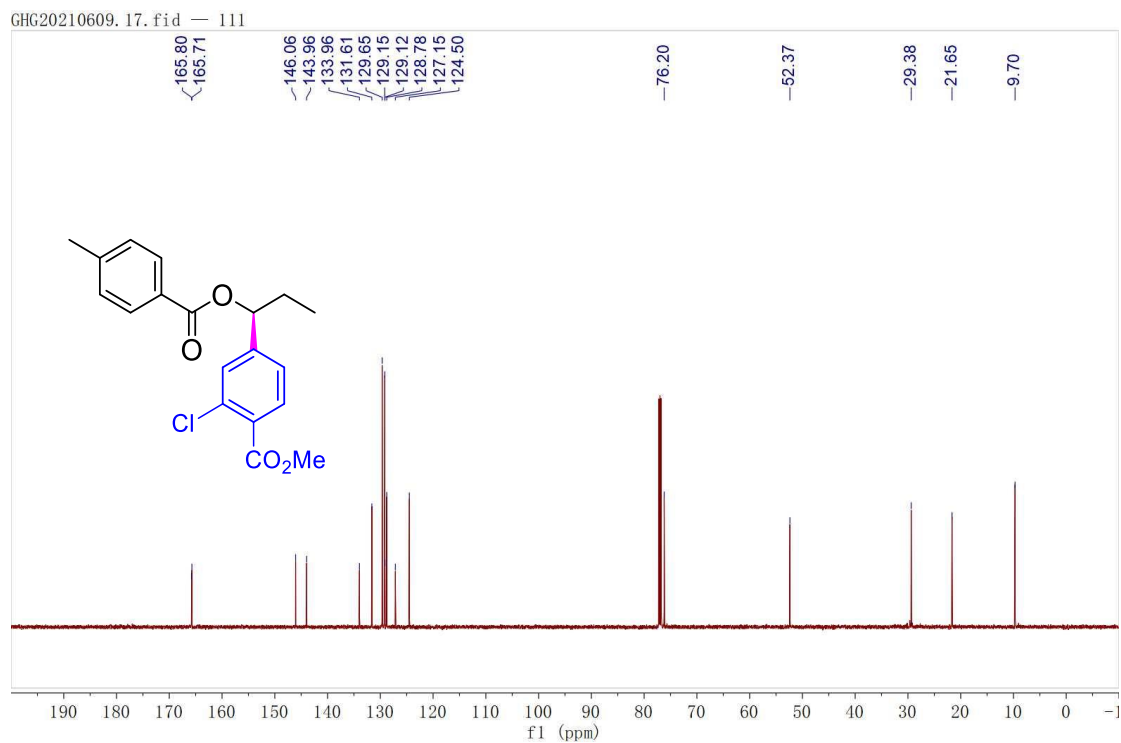

33,  $^1\text{H}$ -NMR (600 MHz,  $\text{CDCl}_3$ )

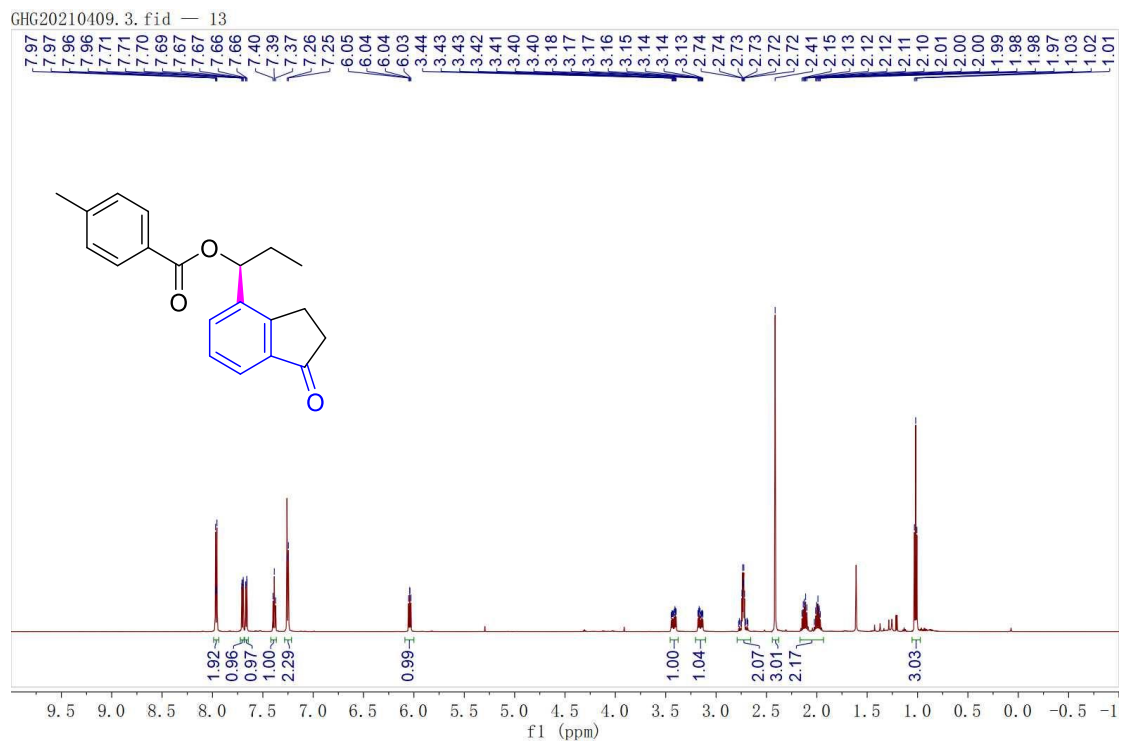

33, <sup>13</sup>C NMR (151 MHz, CDCl<sub>3</sub>)

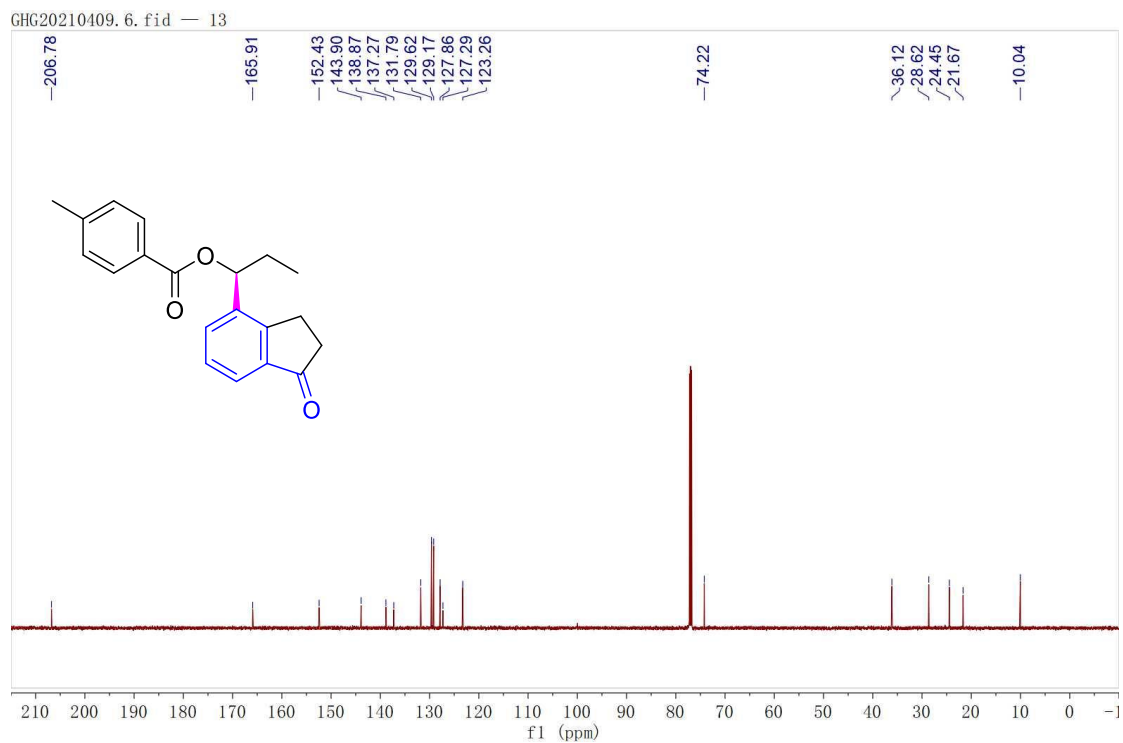

34, <sup>1</sup>H-NMR (600 MHz, CDCl<sub>3</sub>)

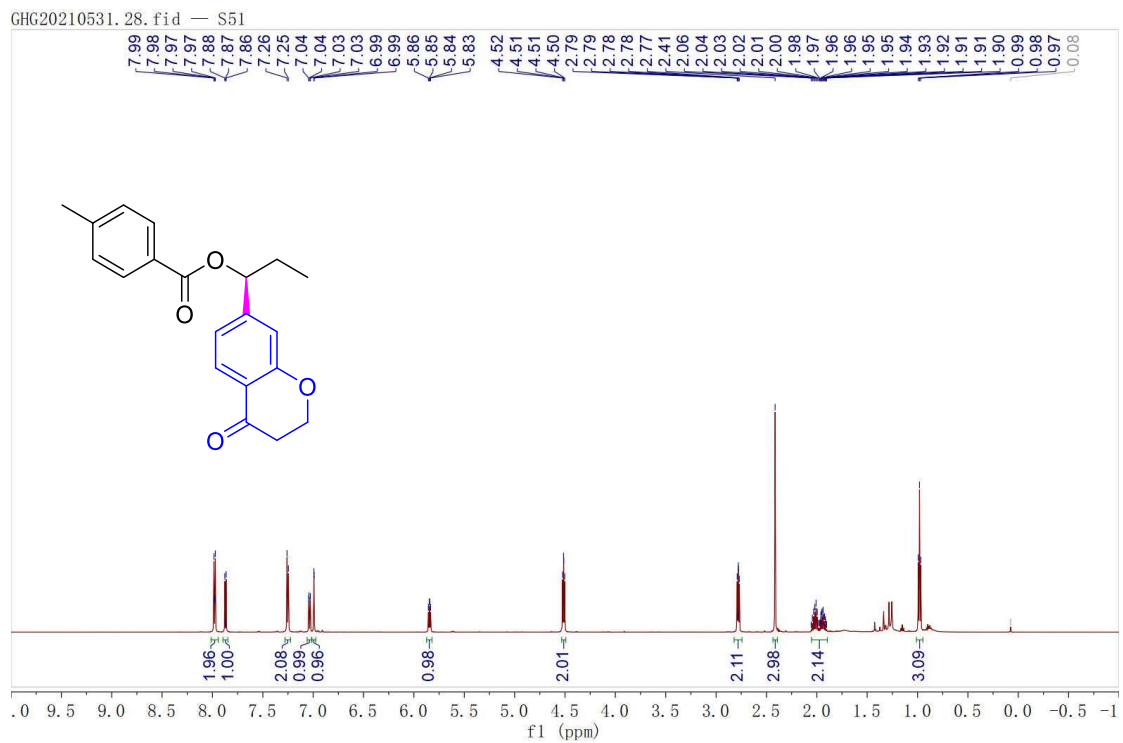

34, <sup>13</sup>C NMR (101 MHz, CDCl<sub>3</sub>)

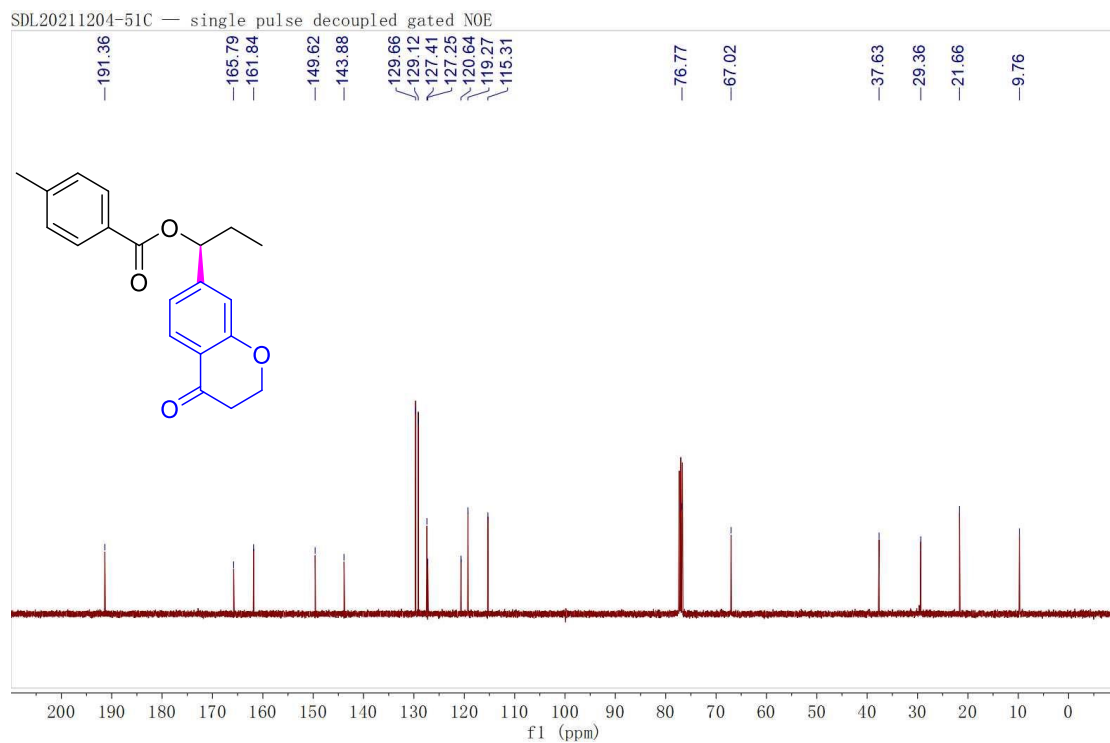

35, <sup>1</sup>H-NMR (600 MHz, CDCl<sub>3</sub>)

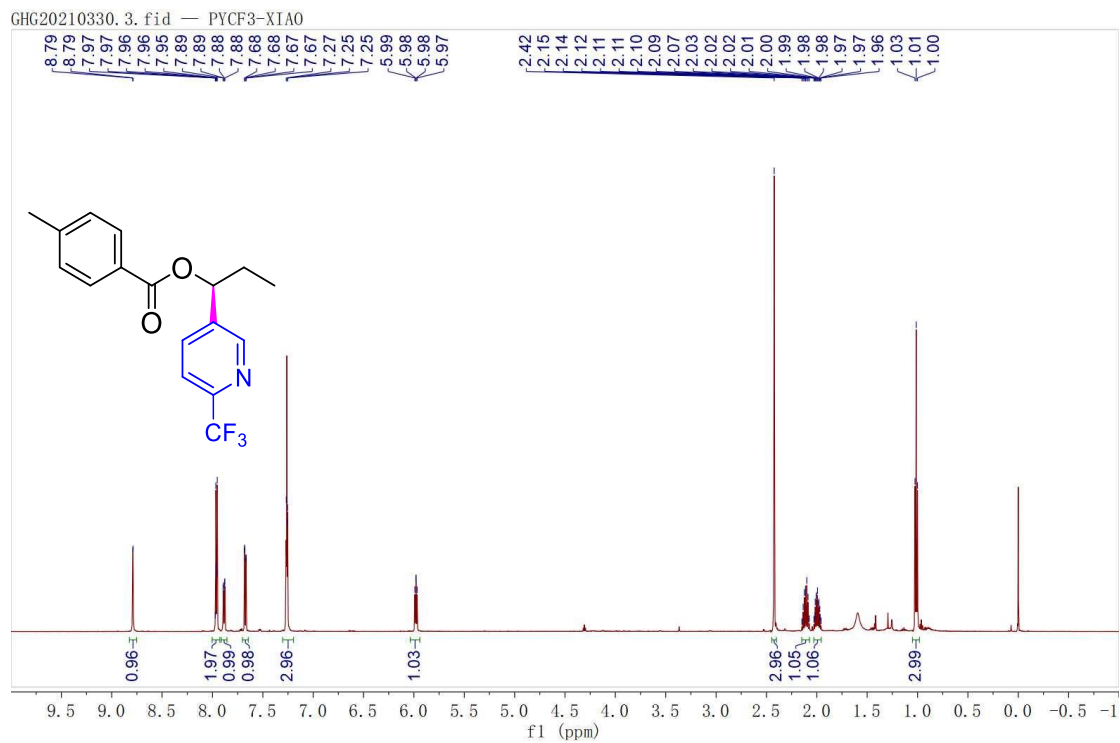

35,  $^{13}\text{C}$  NMR (151 MHz,  $\text{CDCl}_3$ )

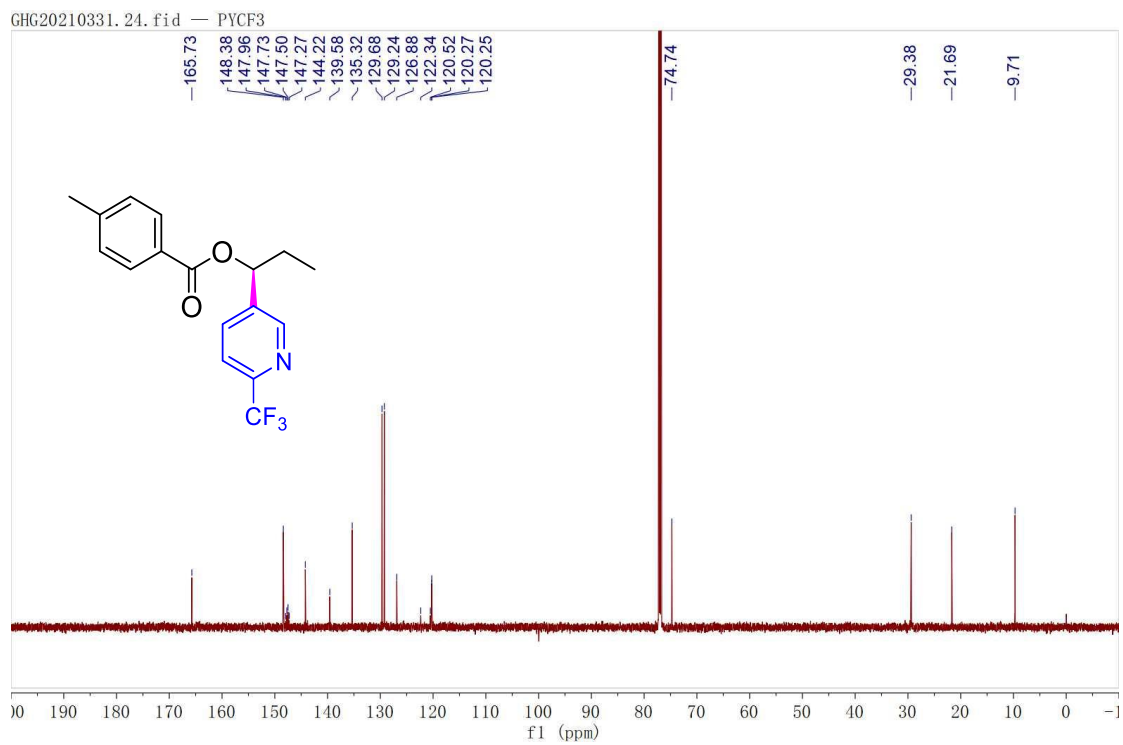

35,  $^{19}\text{F}$  NMR (565 MHz,  $\text{CDCl}_3$ )

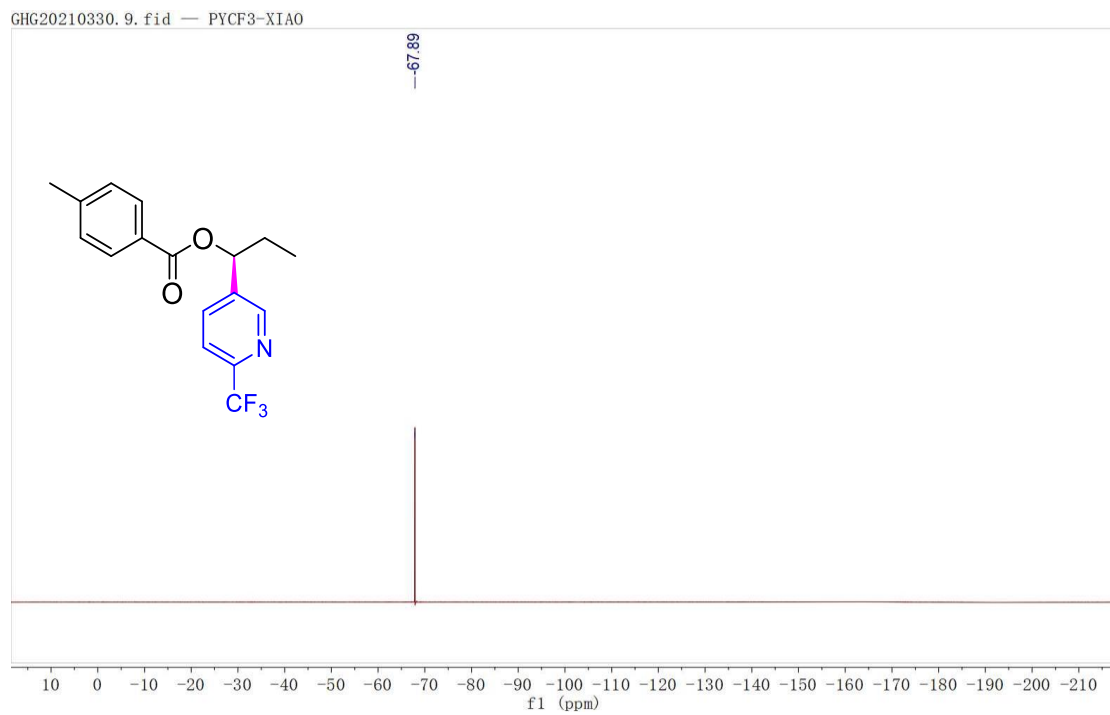

36, <sup>1</sup>H-NMR (600 MHz, CDCl<sub>3</sub>)

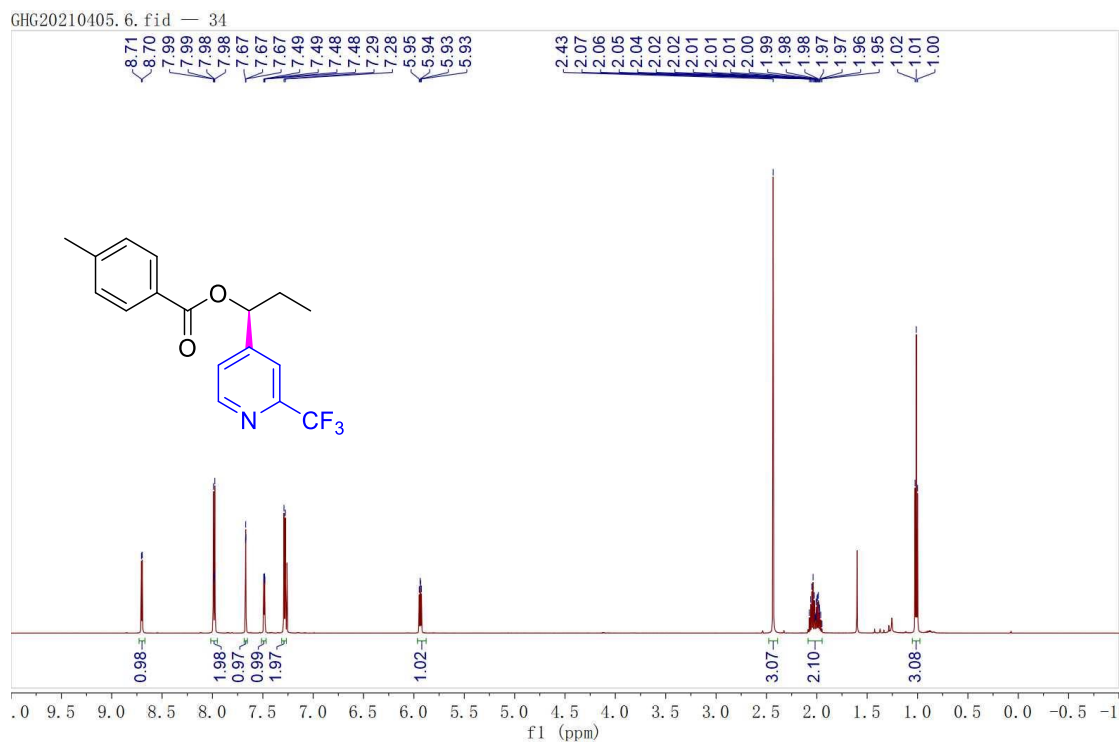

36, <sup>13</sup>C NMR (151 MHz, CDCl<sub>3</sub>)

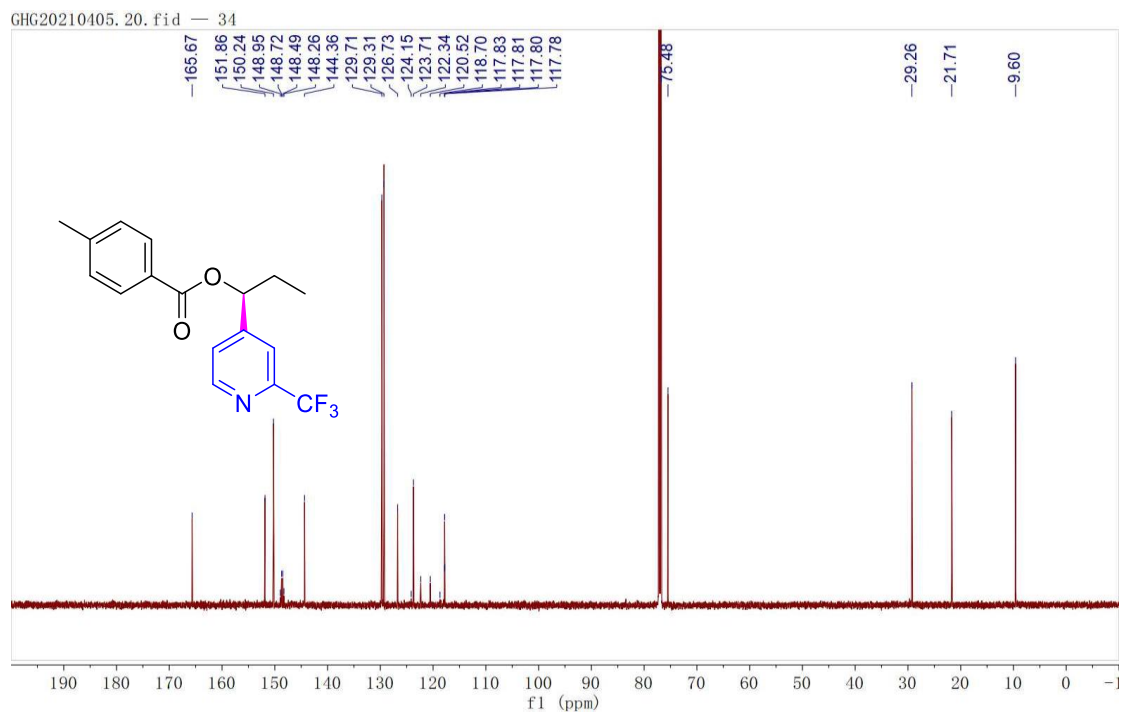



### 36, <sup>19</sup>F NMR (565 MHz, CDCl<sub>3</sub>)

GHG20210405.19.fid — 34

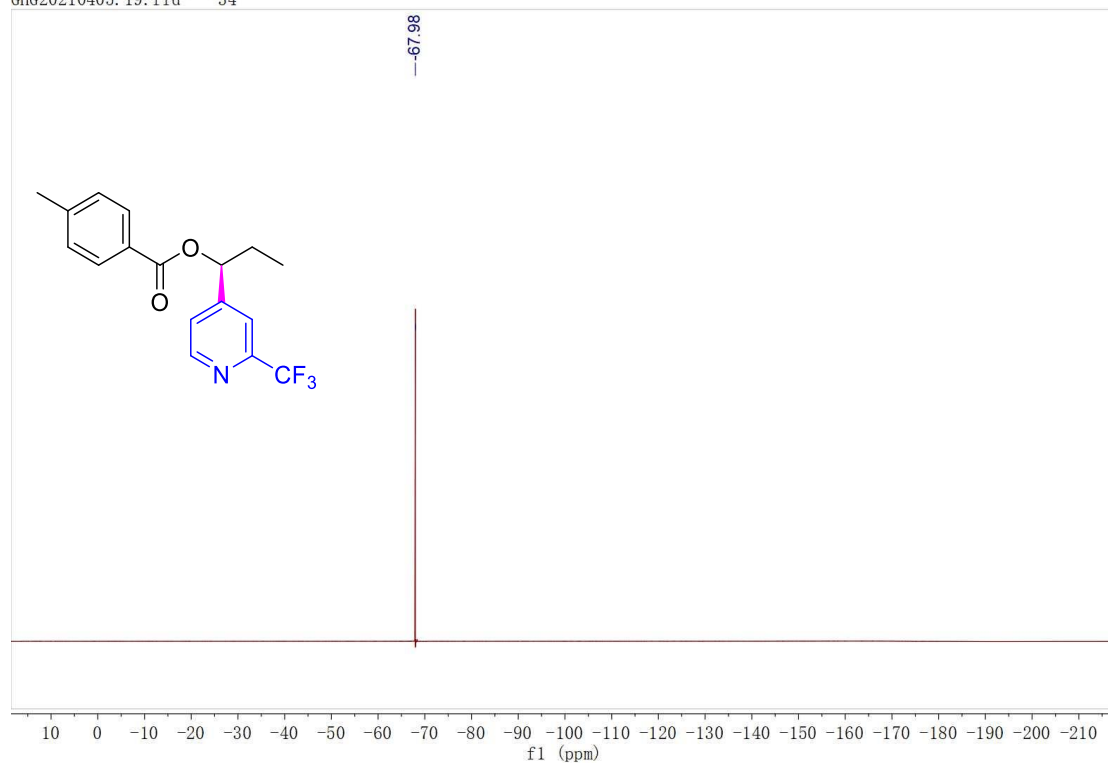

### 37, <sup>1</sup>H-NMR (600 MHz, CDCl<sub>3</sub>)

SDL20210402.7.fid — 35

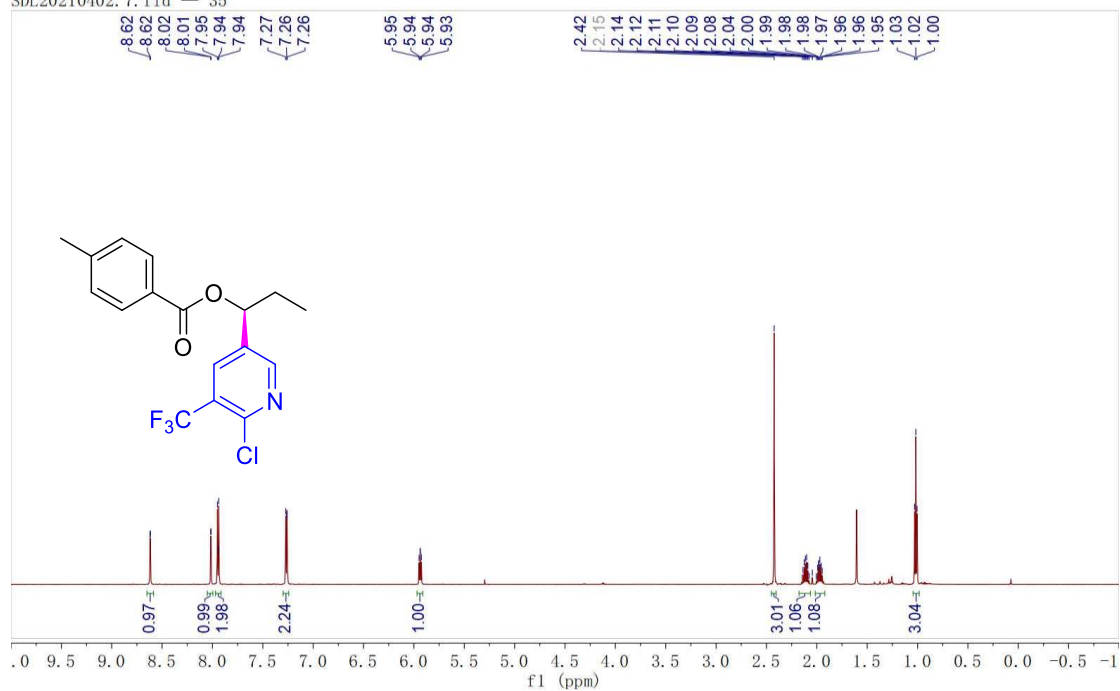

37, <sup>13</sup>C NMR (151 MHz, CDCl<sub>3</sub>)

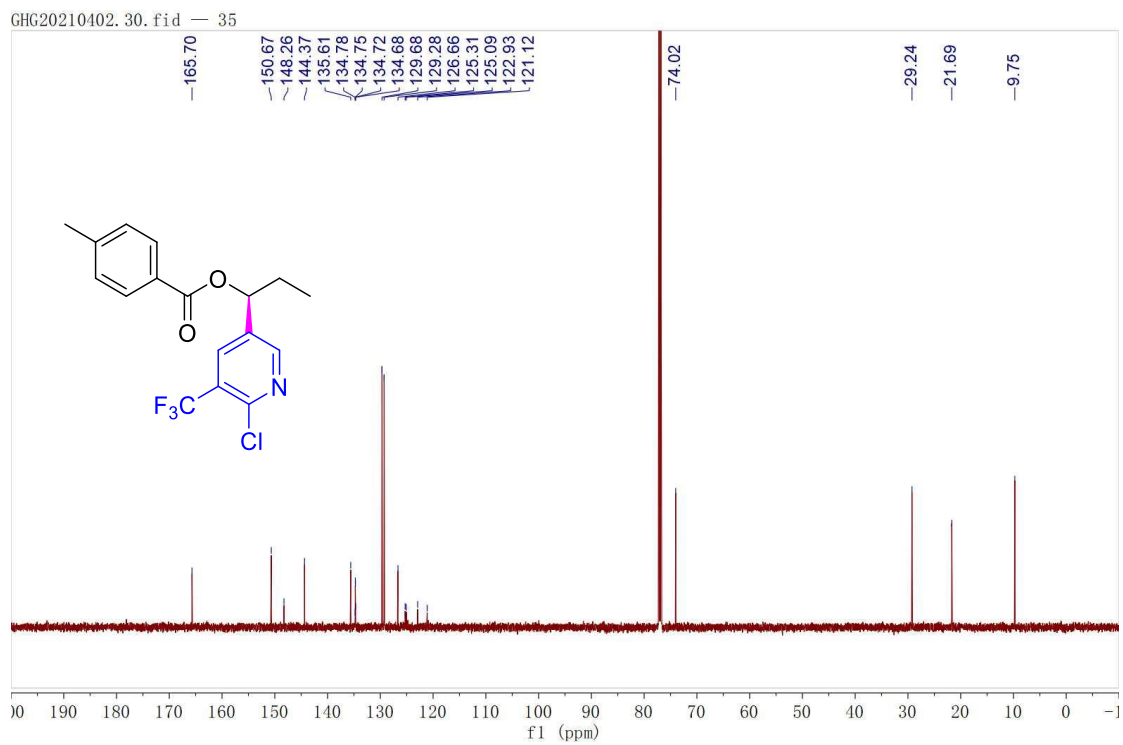

37, <sup>19</sup>F NMR (565 MHz, CDCl<sub>3</sub>)

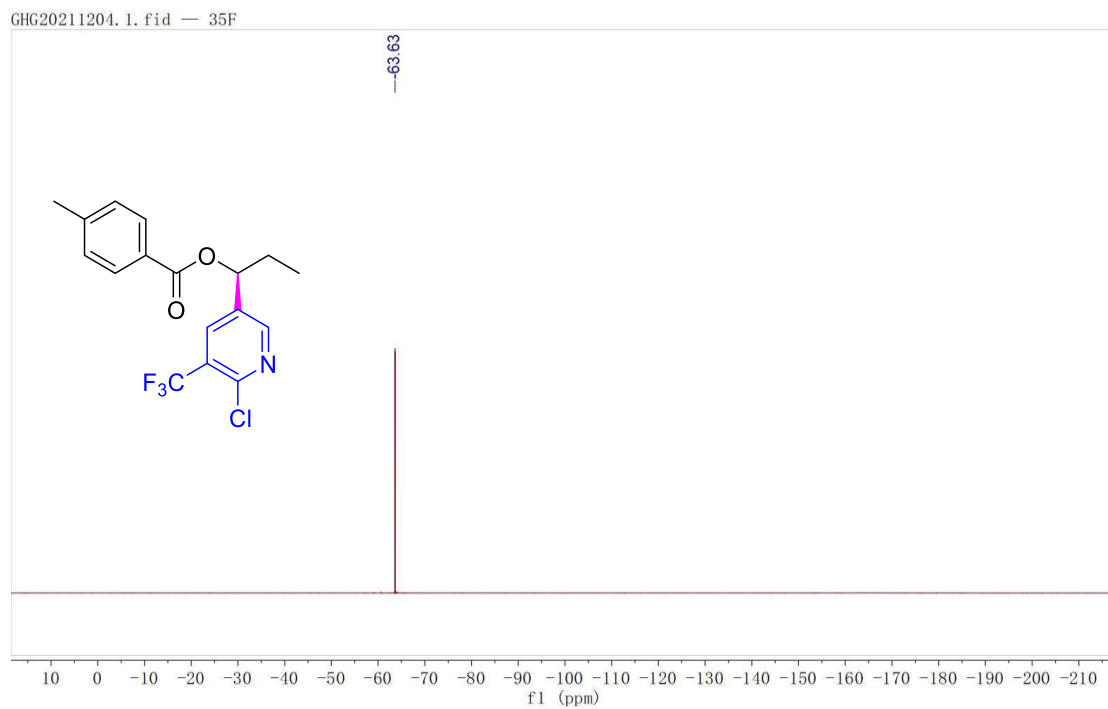

**38, <sup>1</sup>H-NMR (600 MHz, CDCl<sub>3</sub>)**

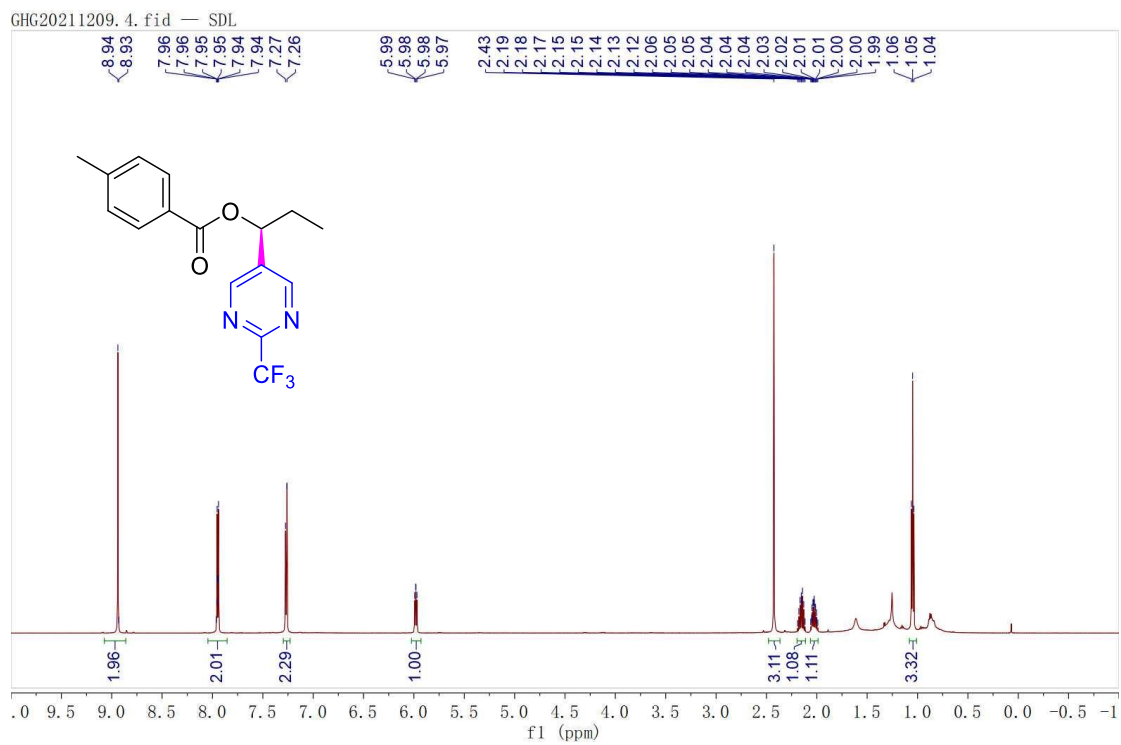

**38, <sup>13</sup>C NMR (151 MHz, CDCl<sub>3</sub>)**

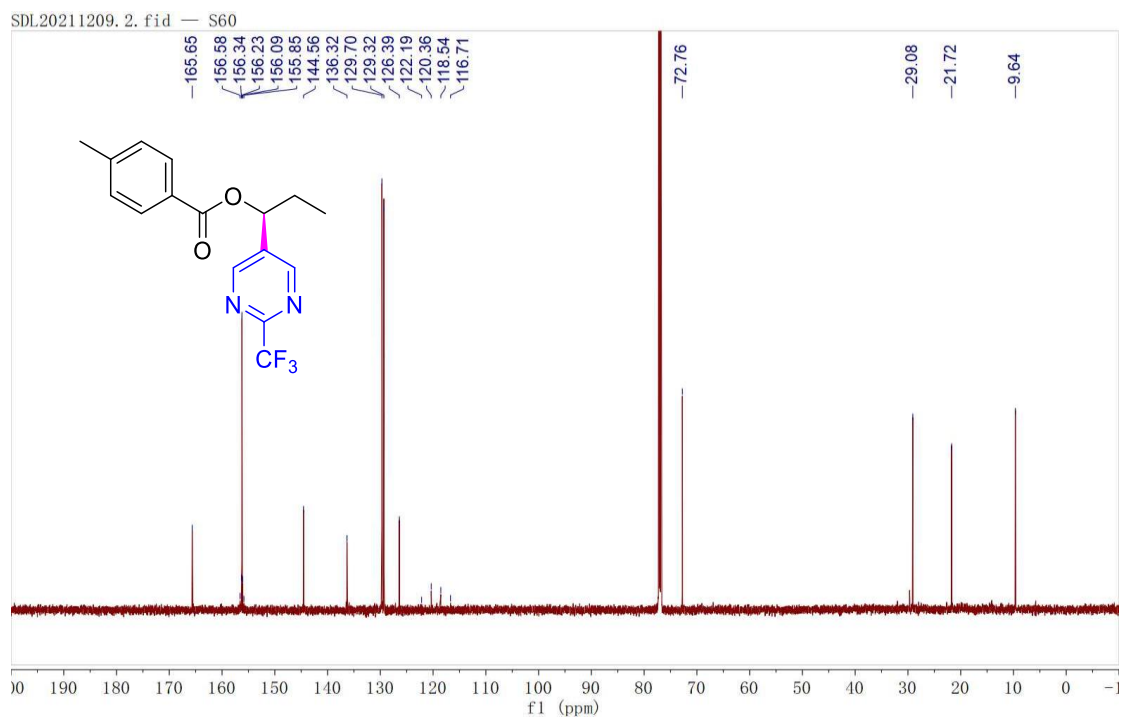

38, <sup>19</sup>F NMR (565 MHz, CDCl<sub>3</sub>)

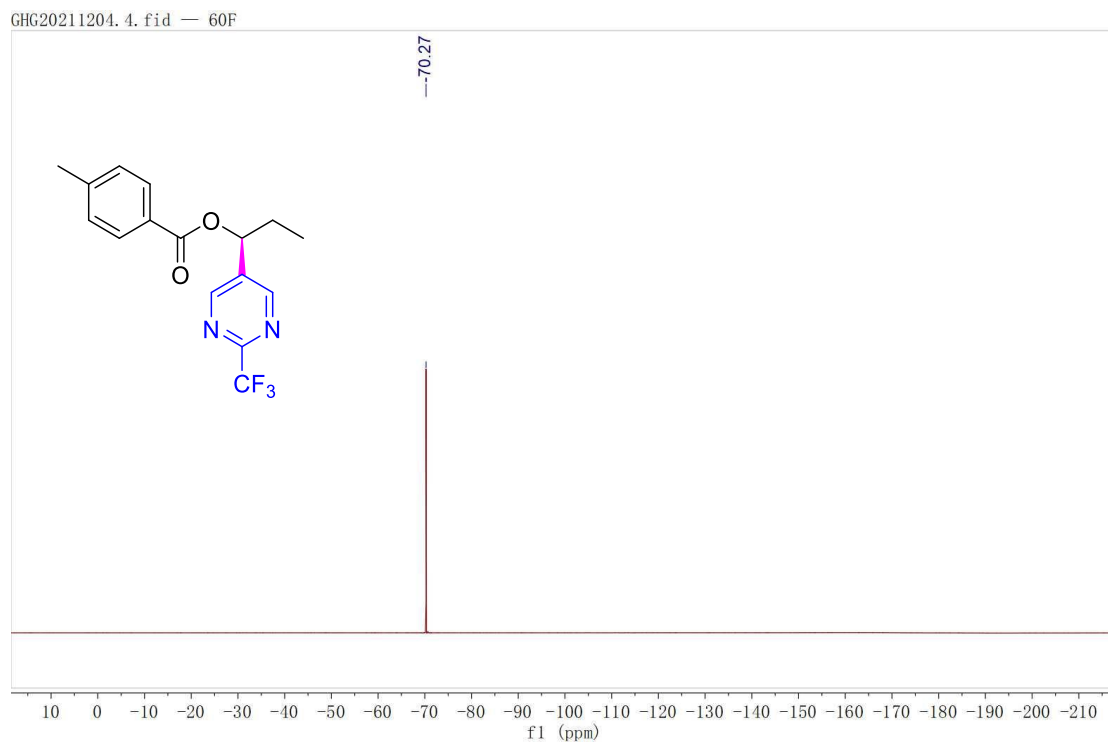

39, <sup>1</sup>H-NMR (400 MHz, CDCl<sub>3</sub>)

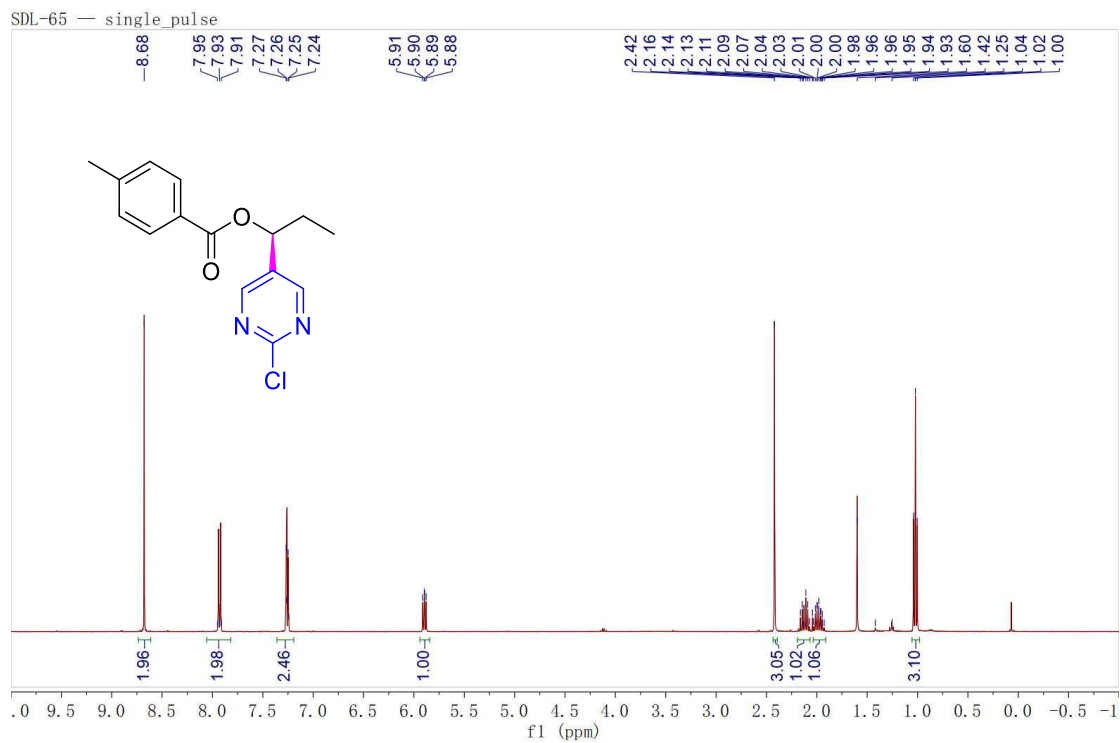

39, <sup>13</sup>C NMR (101 MHz, CDCl<sub>3</sub>)

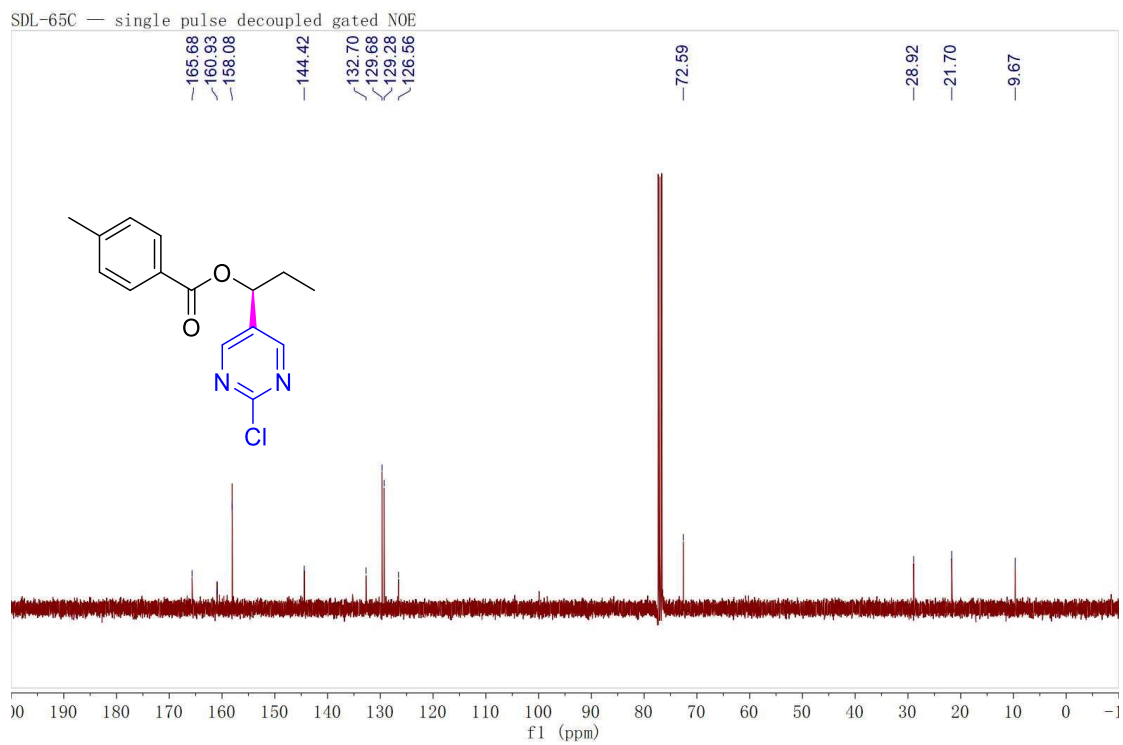

40, <sup>1</sup>H-NMR (600 MHz, CDCl<sub>3</sub>)

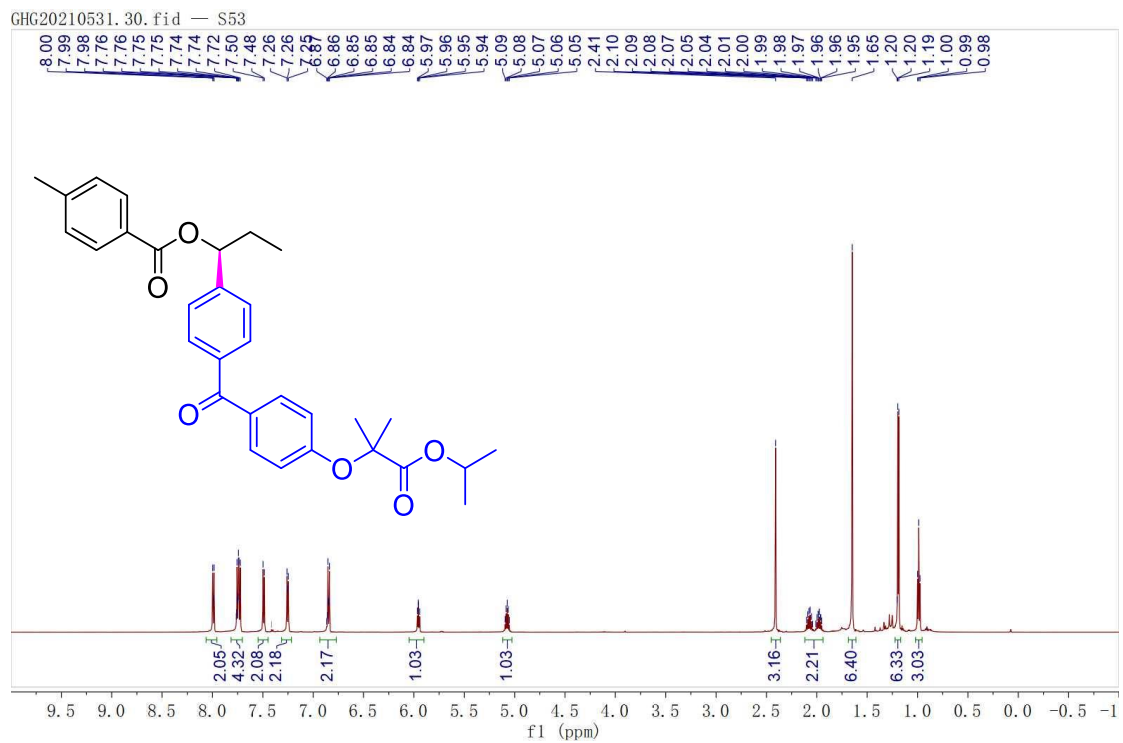

40, <sup>13</sup>C NMR (101 MHz, CDCl<sub>3</sub>)

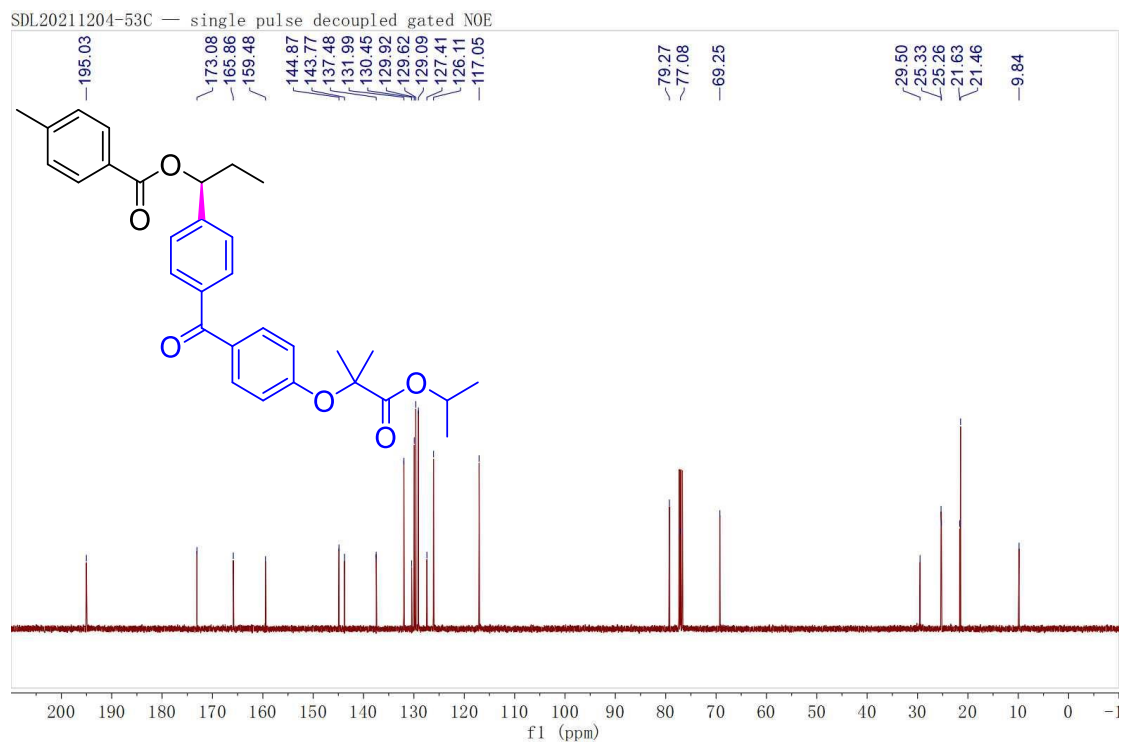

41, <sup>1</sup>H-NMR (600 MHz, CDCl<sub>3</sub>)

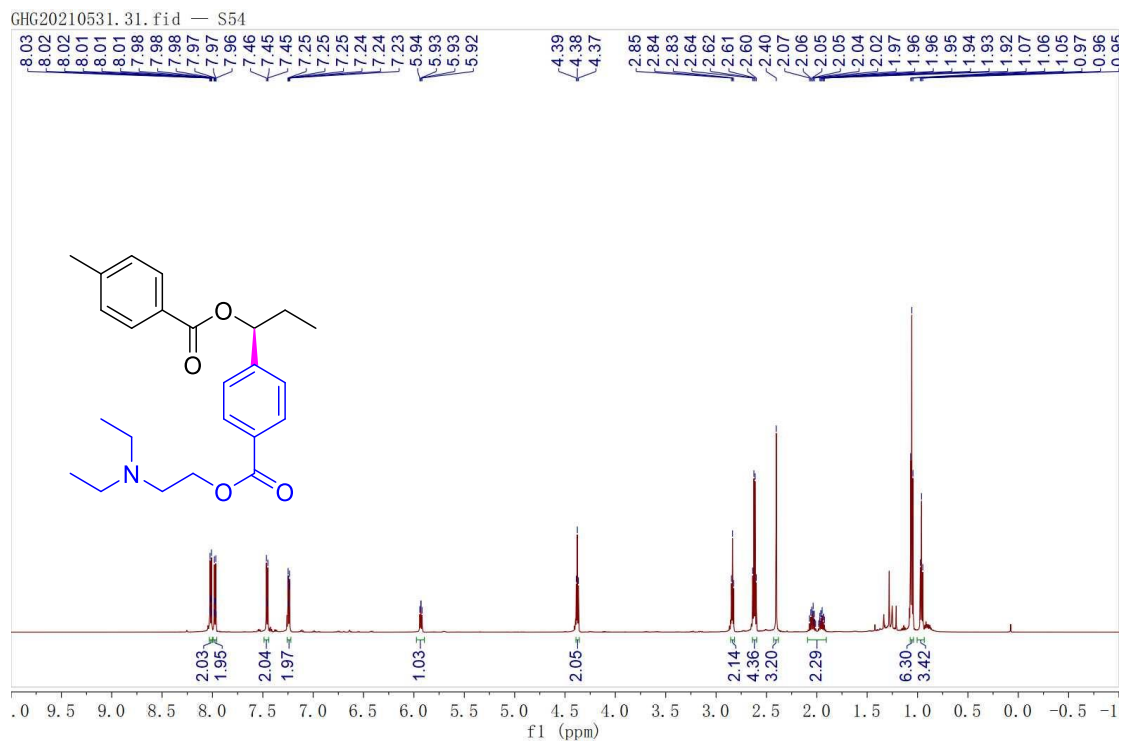

41, <sup>13</sup>C NMR (151 MHz, CDCl<sub>3</sub>)

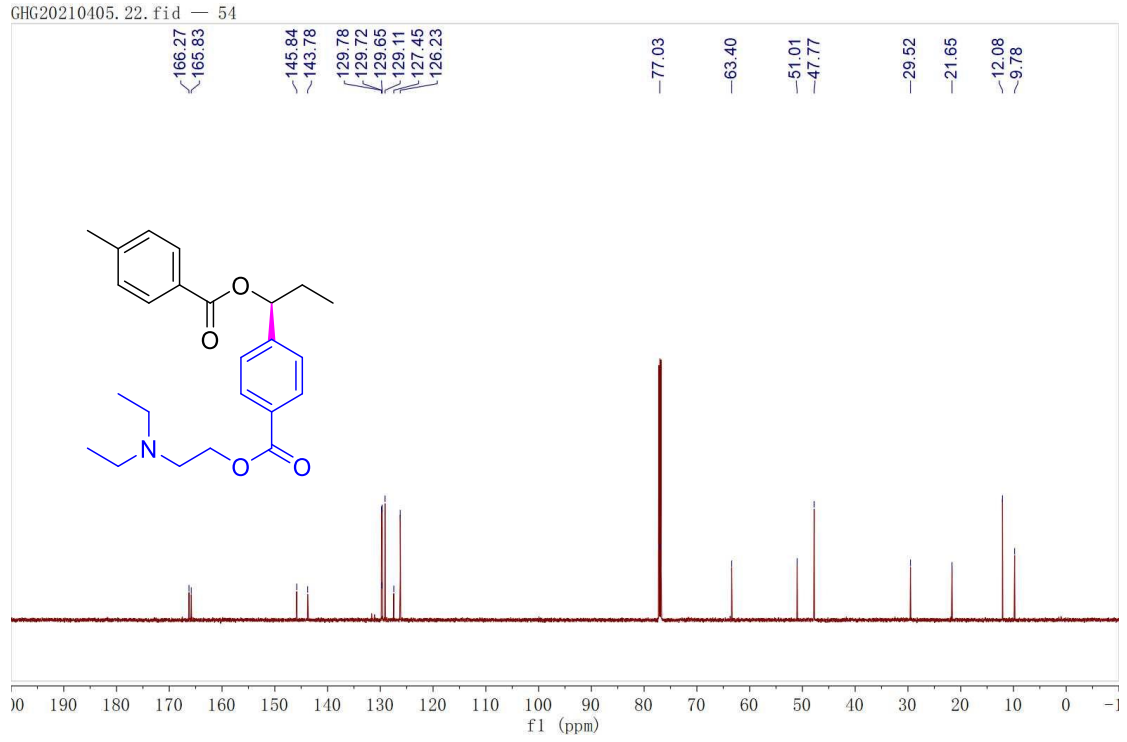

42, <sup>1</sup>H-NMR (600 MHz, CDCl<sub>3</sub>)

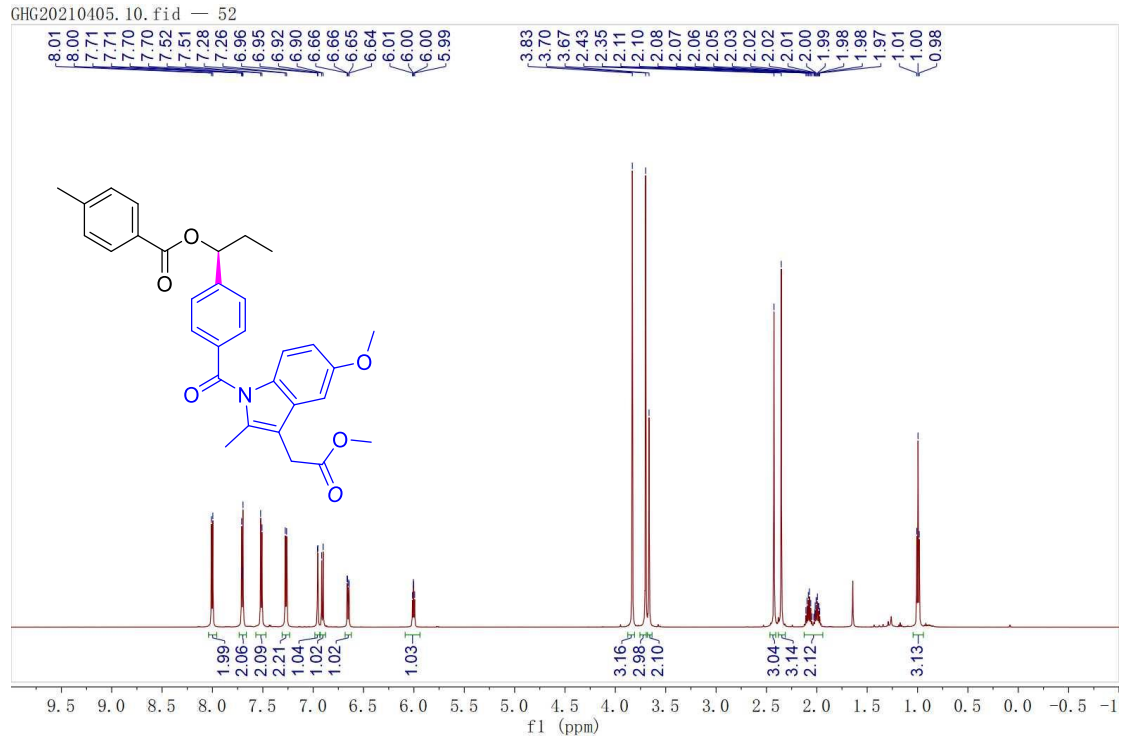

42, <sup>13</sup>C NMR (151 MHz, CDCl<sub>3</sub>)

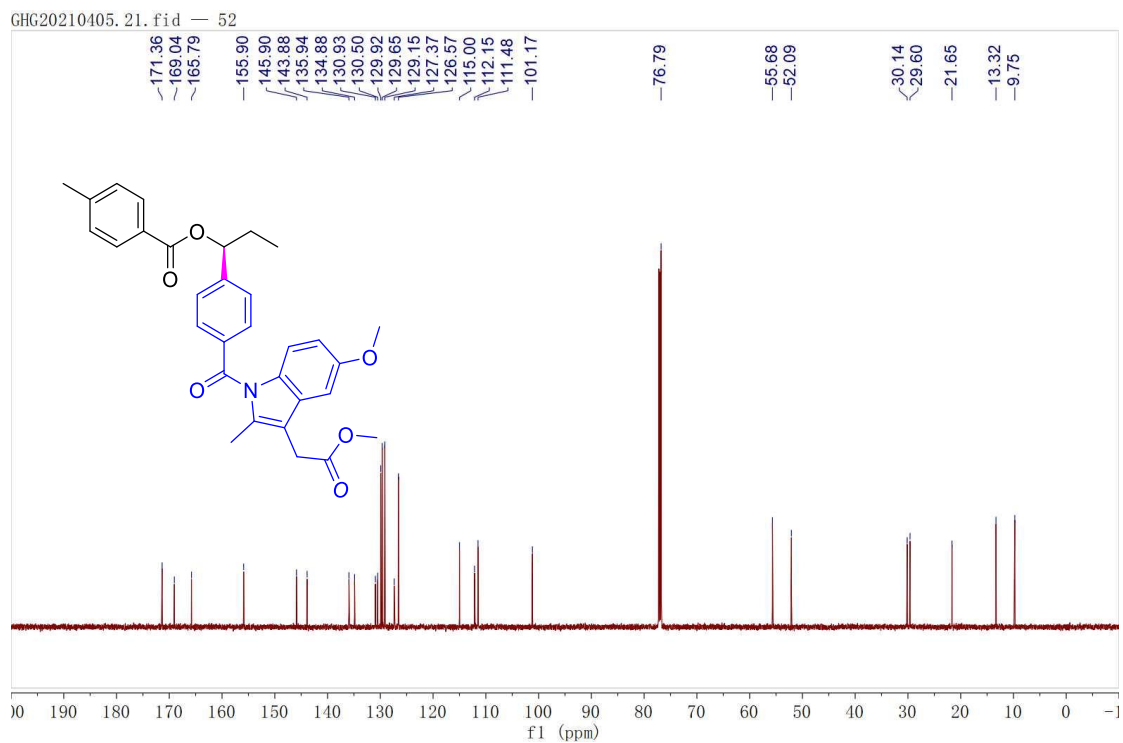

43, <sup>1</sup>H-NMR (600 MHz, CDCl<sub>3</sub>)

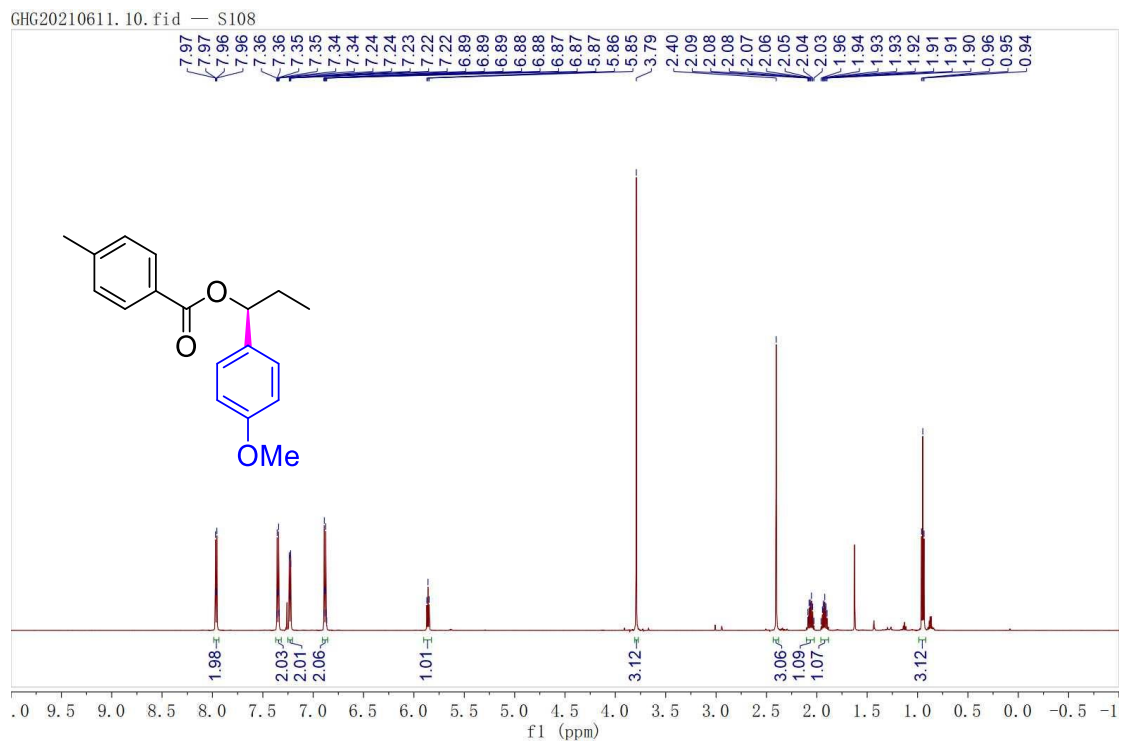



43, <sup>13</sup>C NMR (151 MHz, CDCl<sub>3</sub>)

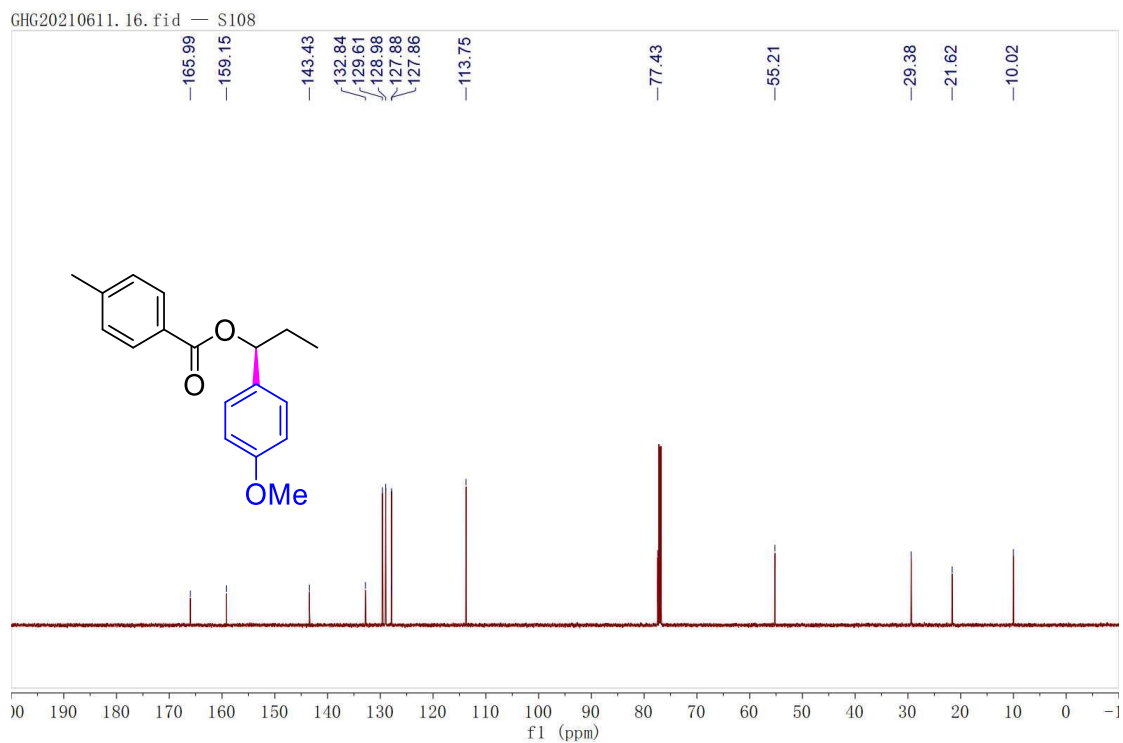

44, <sup>1</sup>H-NMR (600 MHz, CDCl<sub>3</sub>)

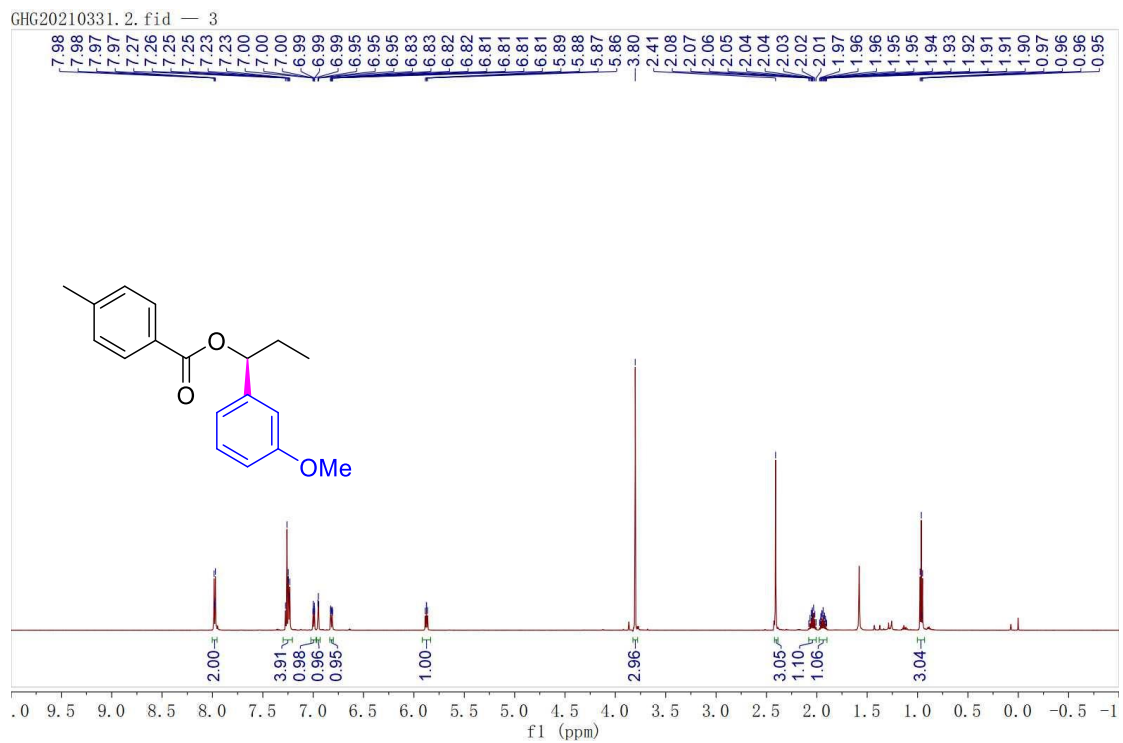

#### 44, $^{13}\text{C}$ NMR (151 MHz, $\text{CDCl}_3$ )

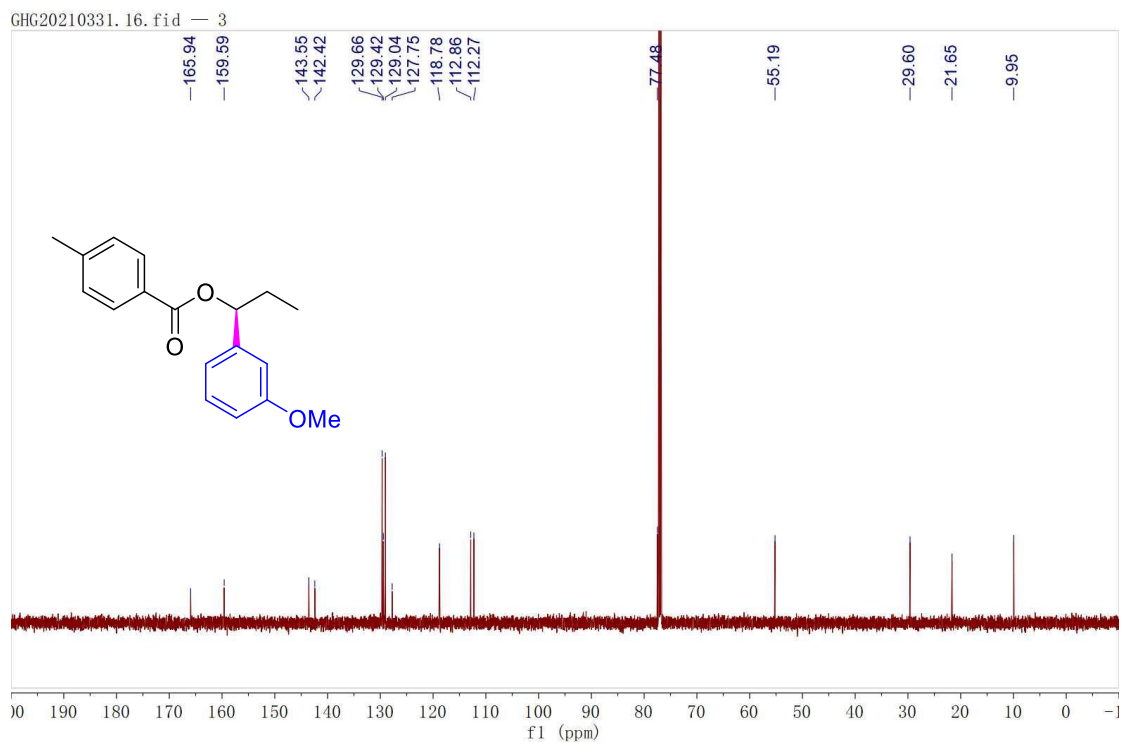

#### 45, $^1\text{H}$ -NMR (400 MHz, $\text{CDCl}_3$ )

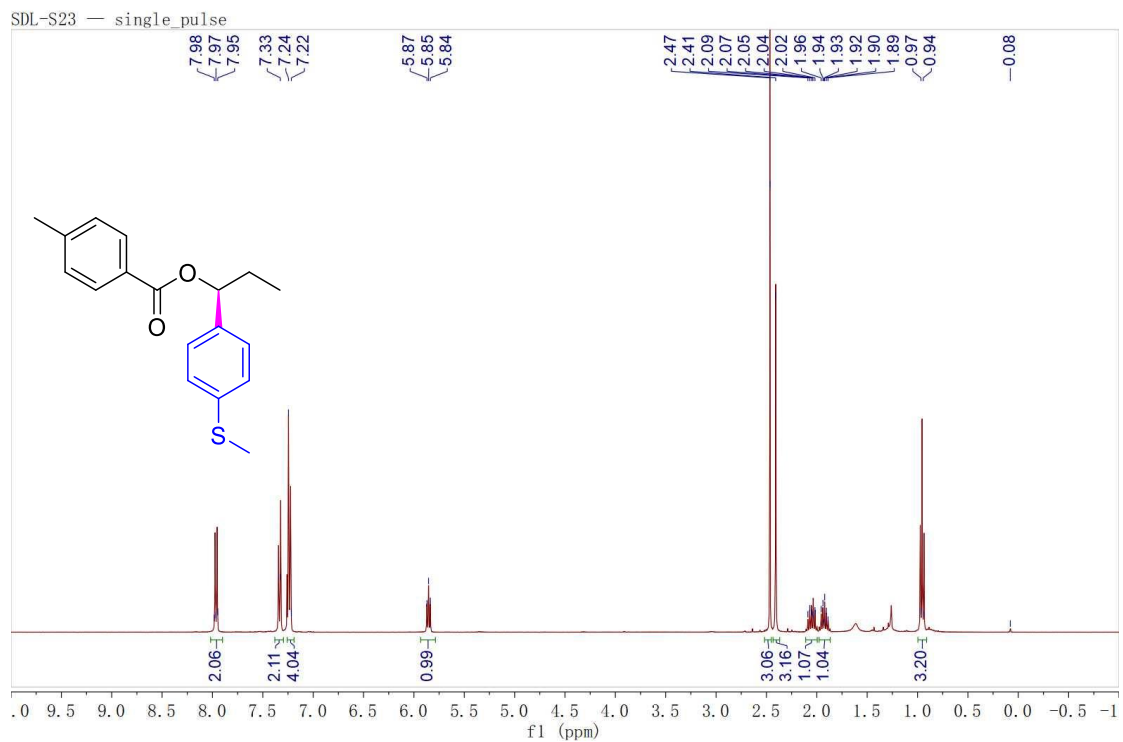

### 45, <sup>13</sup>C NMR (101 MHz, CDCl<sub>3</sub>)

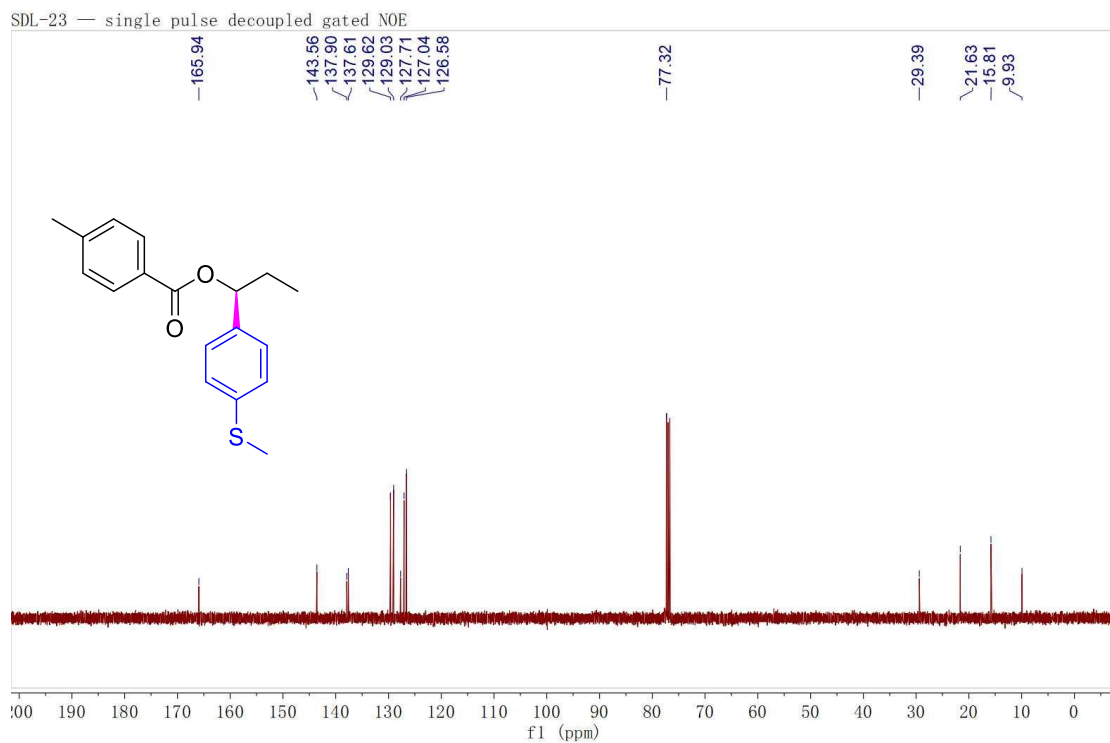

### 46, <sup>1</sup>H-NMR (600 MHz, CDCl<sub>3</sub>)

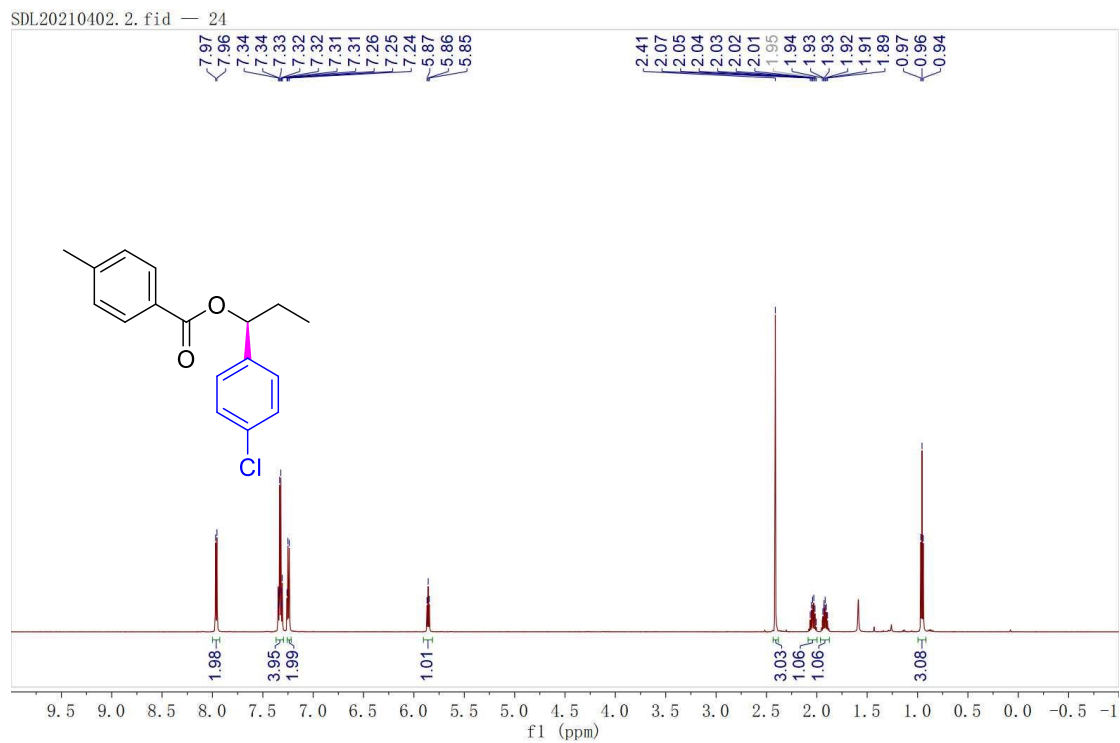

46, <sup>13</sup>C NMR (151 MHz, CDCl<sub>3</sub>)

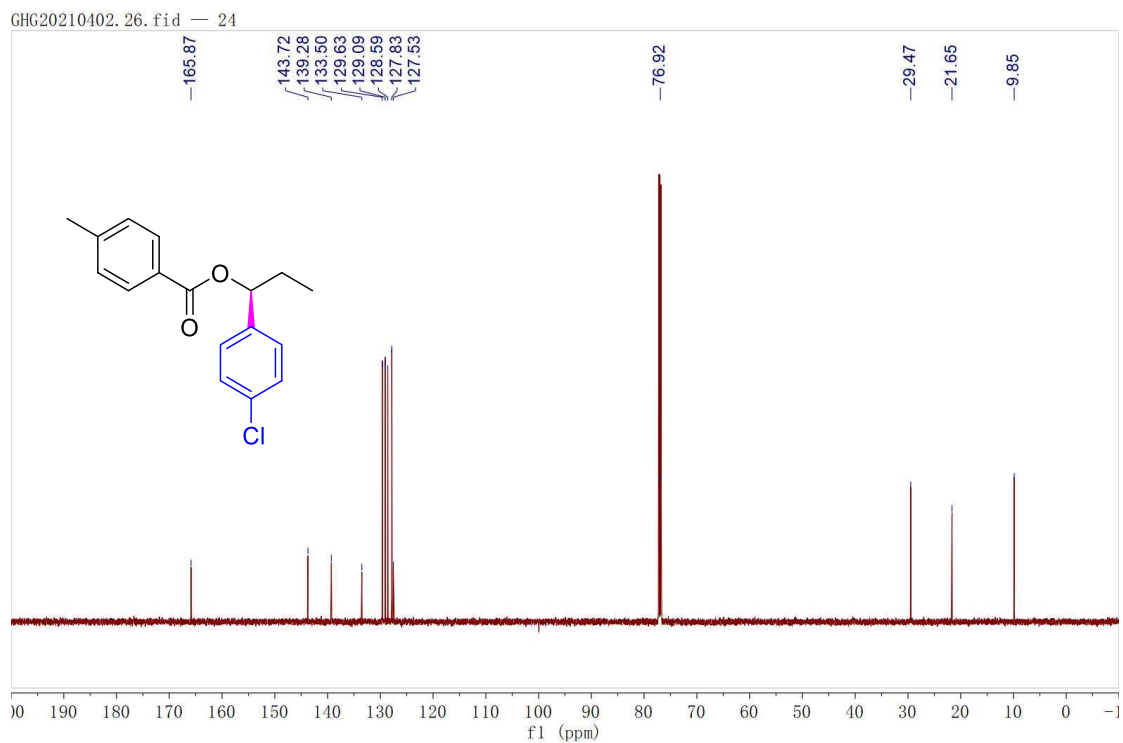

47, <sup>1</sup>H-NMR (600 MHz, CDCl<sub>3</sub>)

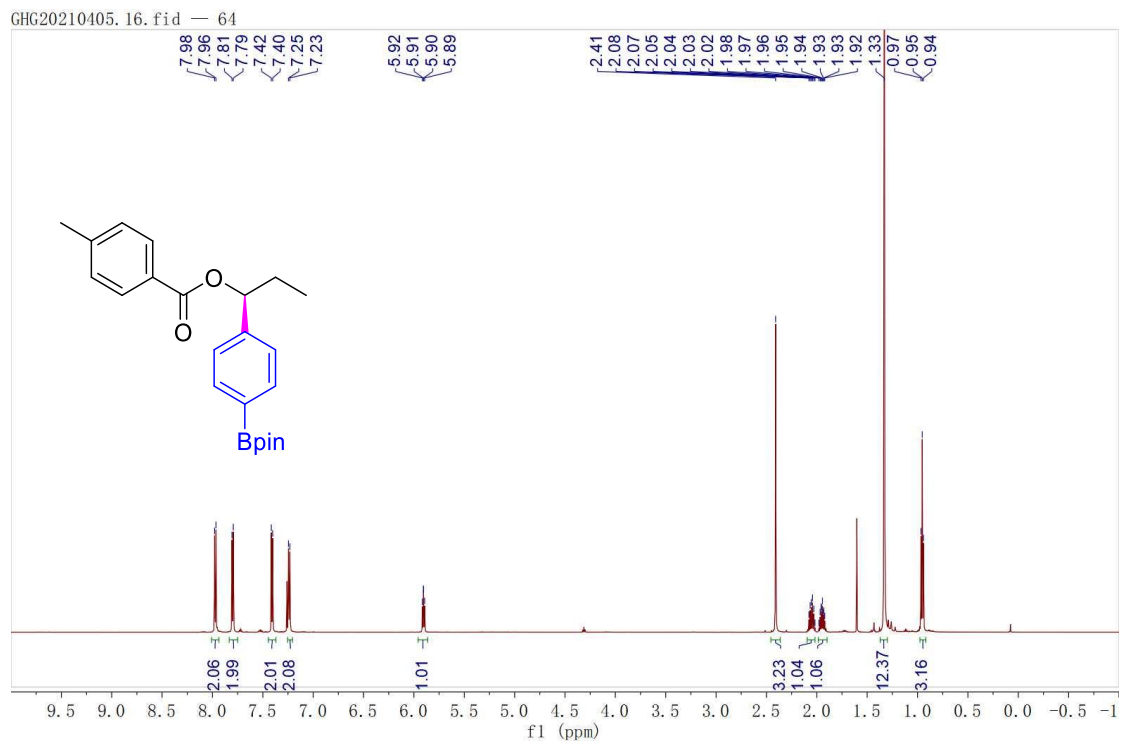

47, <sup>13</sup>C NMR (151 MHz, CDCl<sub>3</sub>)

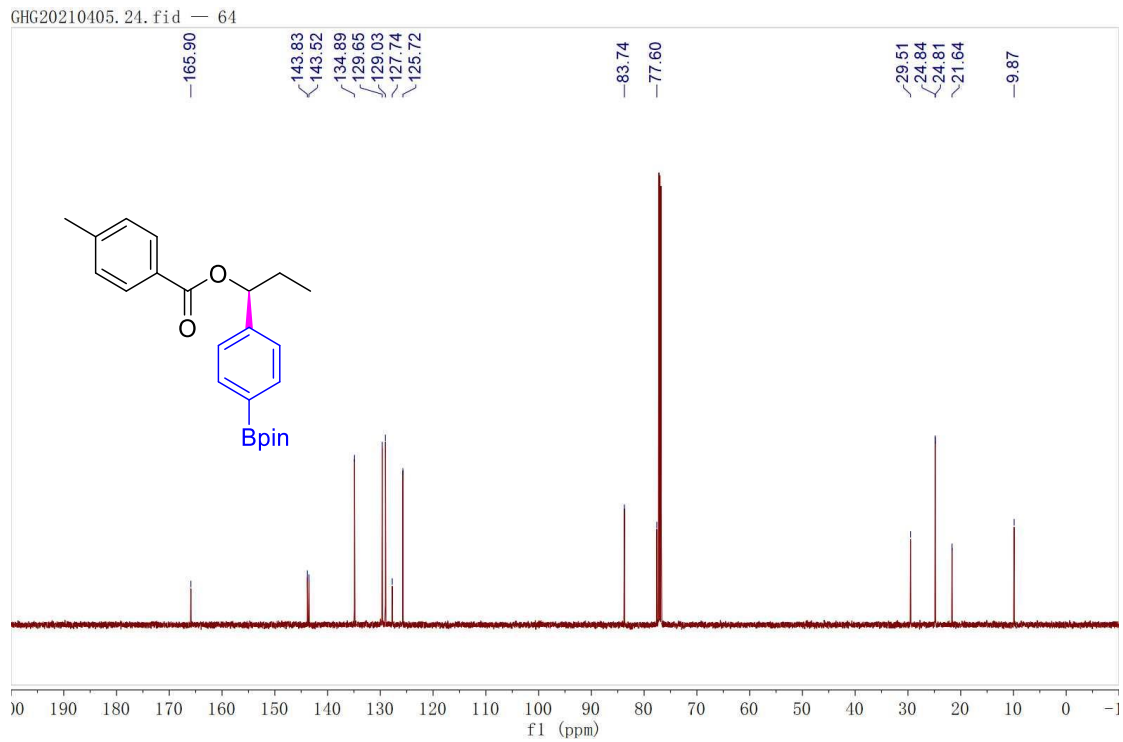

48, <sup>1</sup>H-NMR (600 MHz, CDCl<sub>3</sub>)

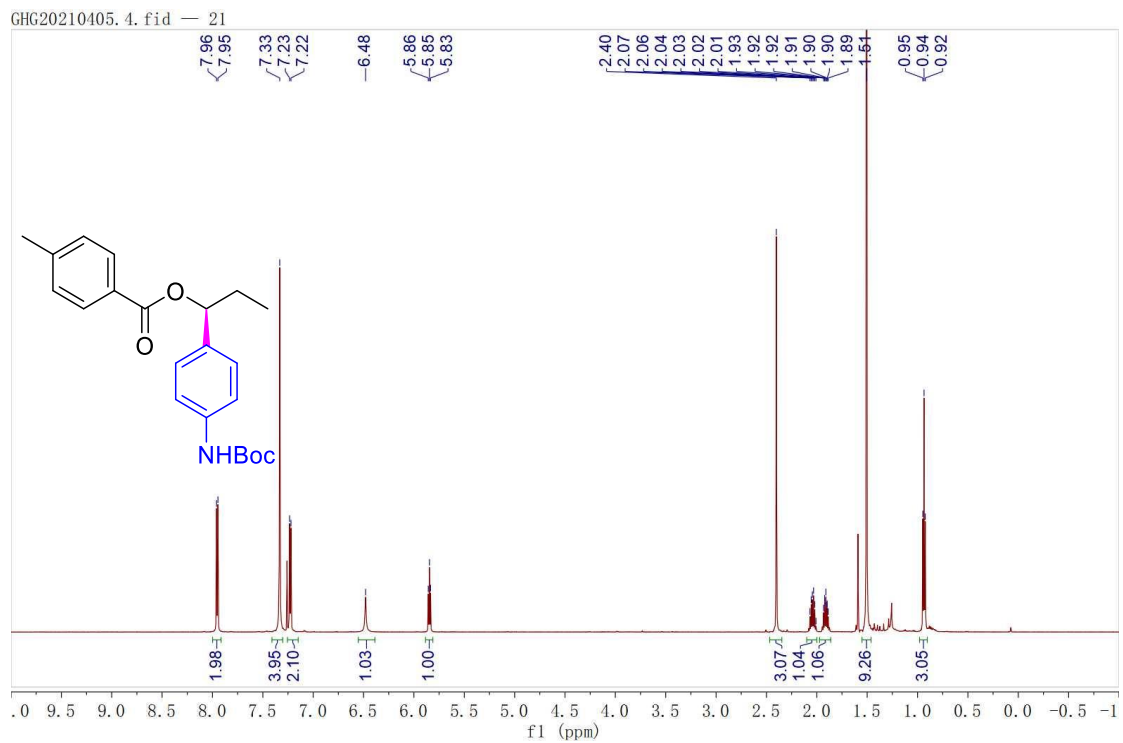

48, <sup>13</sup>C NMR (151 MHz, CDCl<sub>3</sub>)

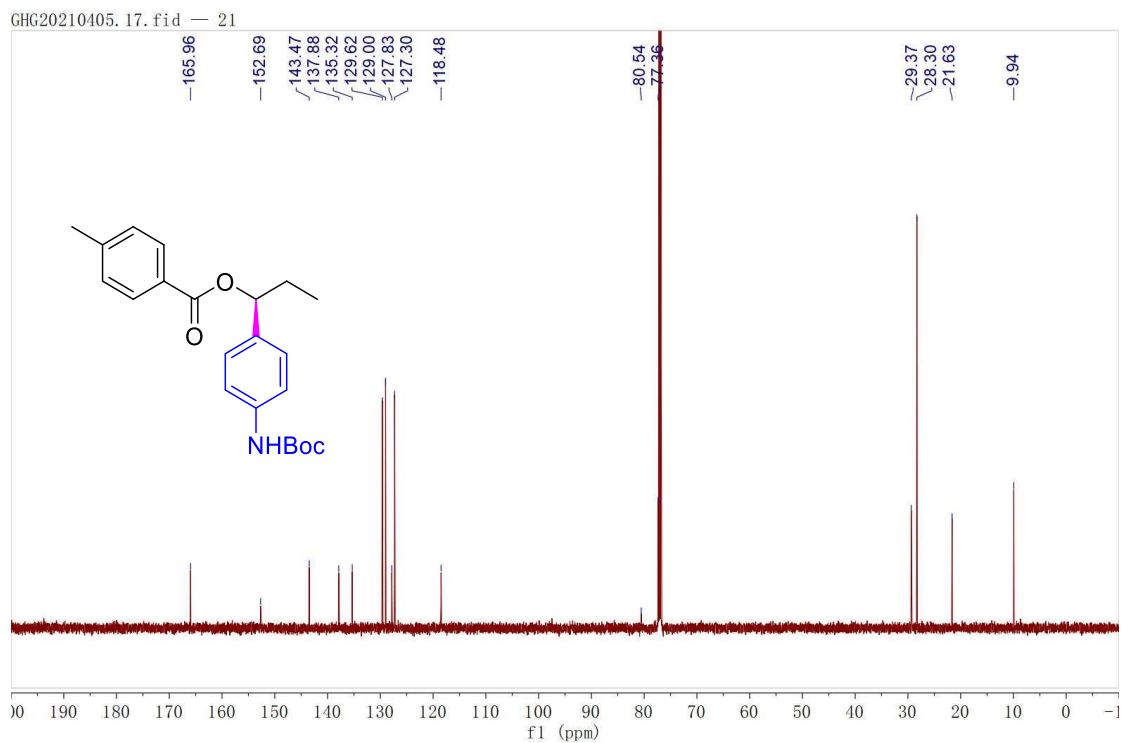

49, <sup>1</sup>H-NMR (600 MHz, CDCl<sub>3</sub>)

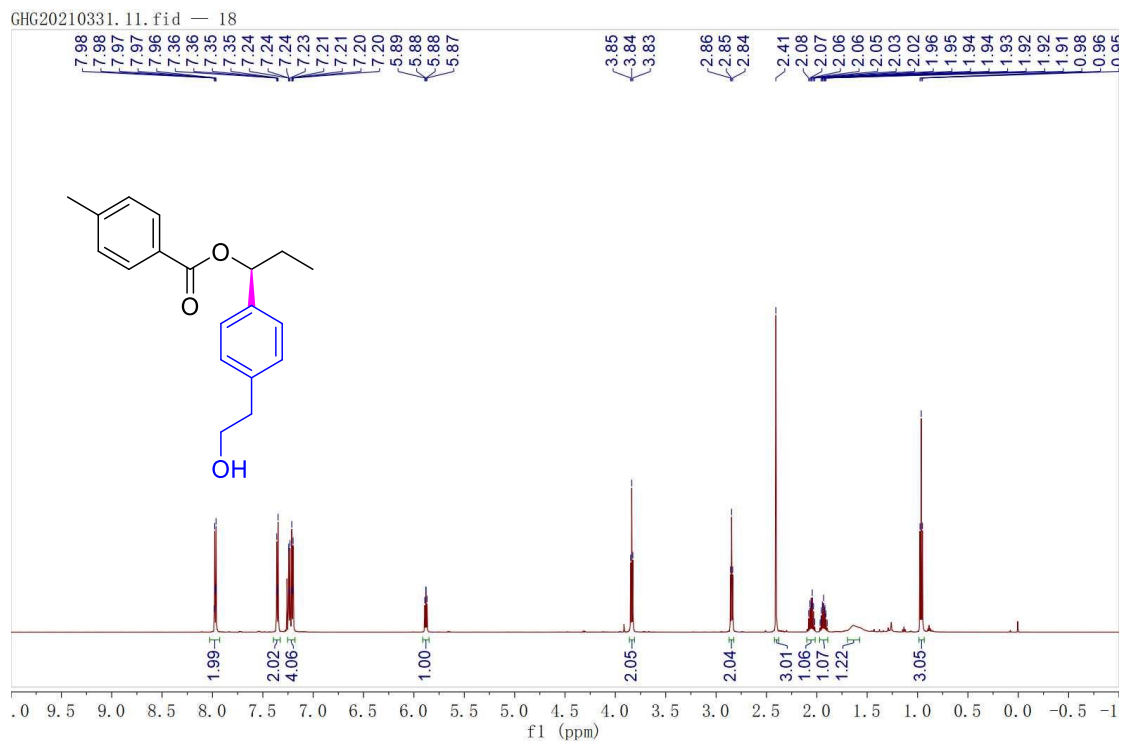

49, <sup>13</sup>C NMR (151 MHz, CDCl<sub>3</sub>)

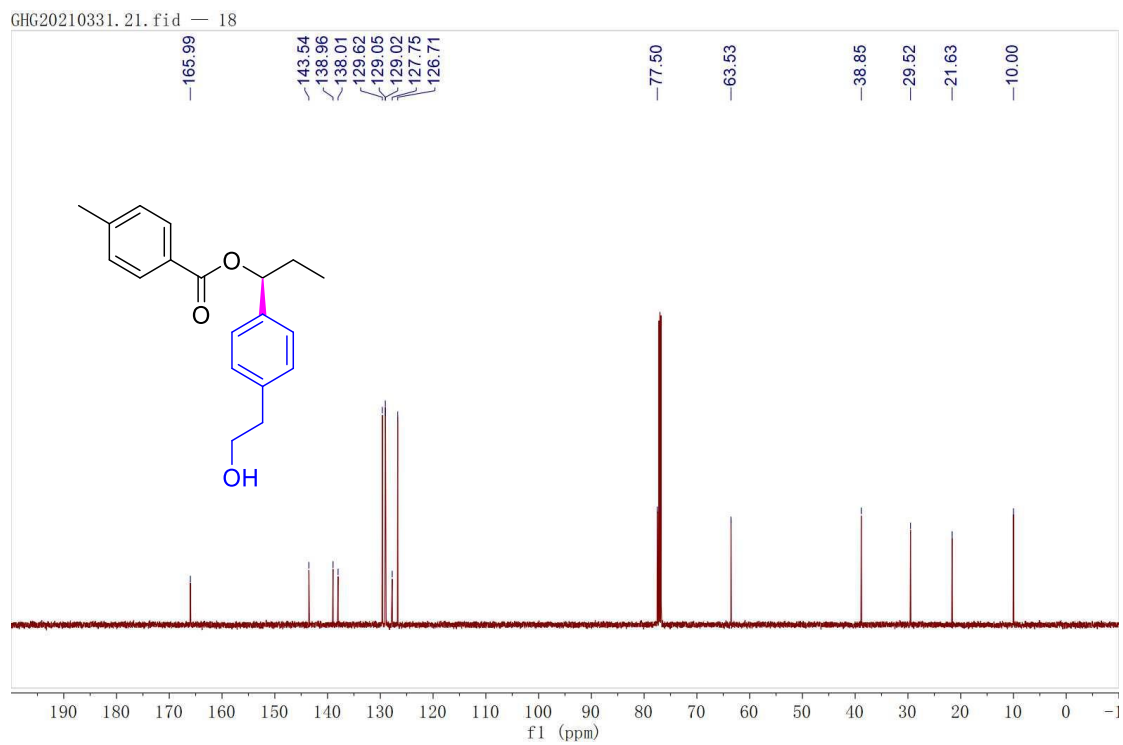

50, <sup>1</sup>H-NMR (600 MHz, CDCl<sub>3</sub>)

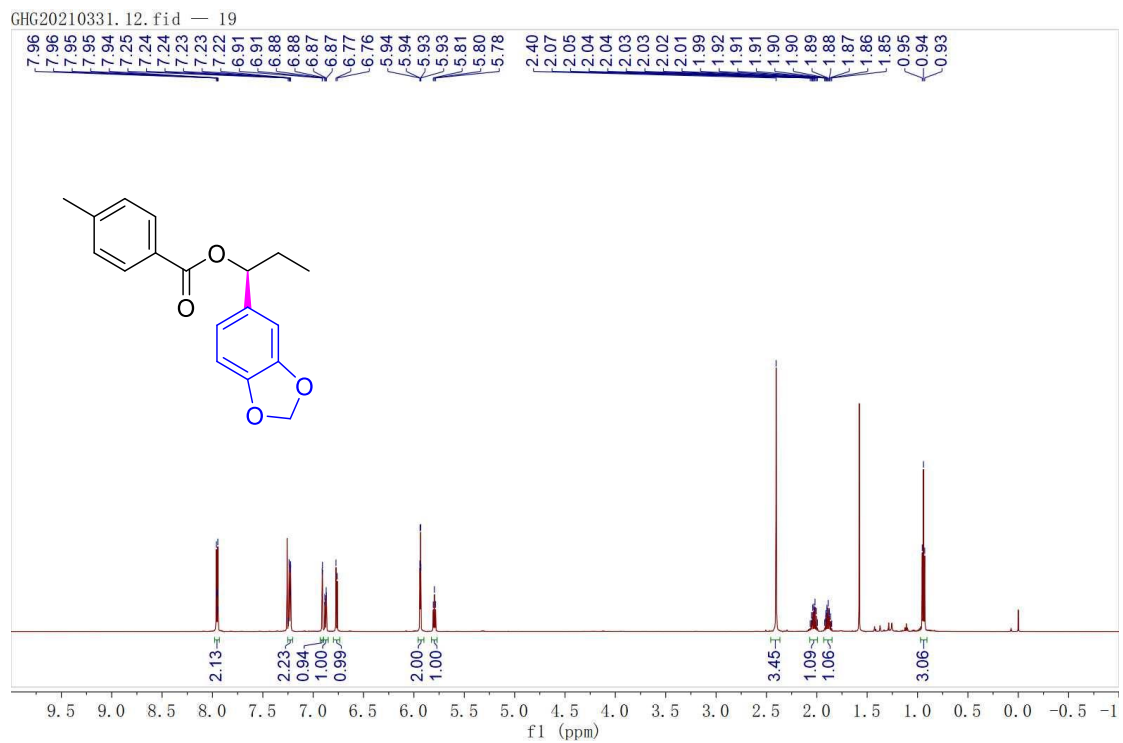

50, <sup>13</sup>C NMR (151 MHz, CDCl<sub>3</sub>)

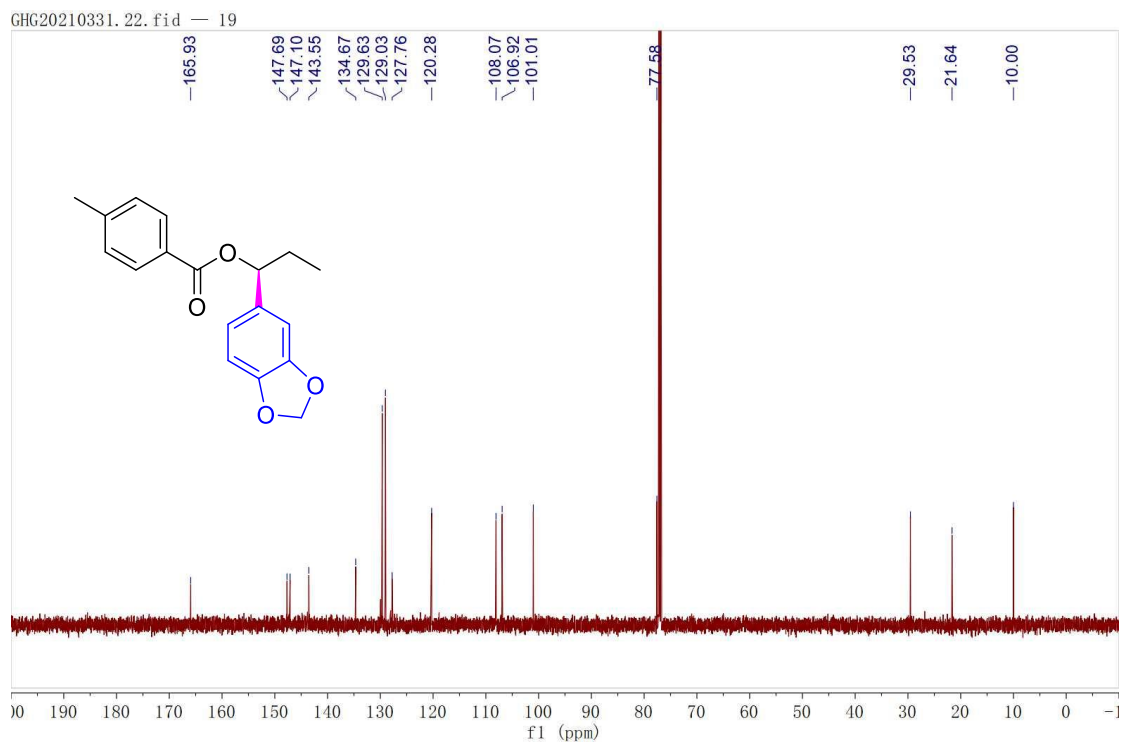

51, <sup>1</sup>H-NMR (600 MHz, CDCl<sub>3</sub>)

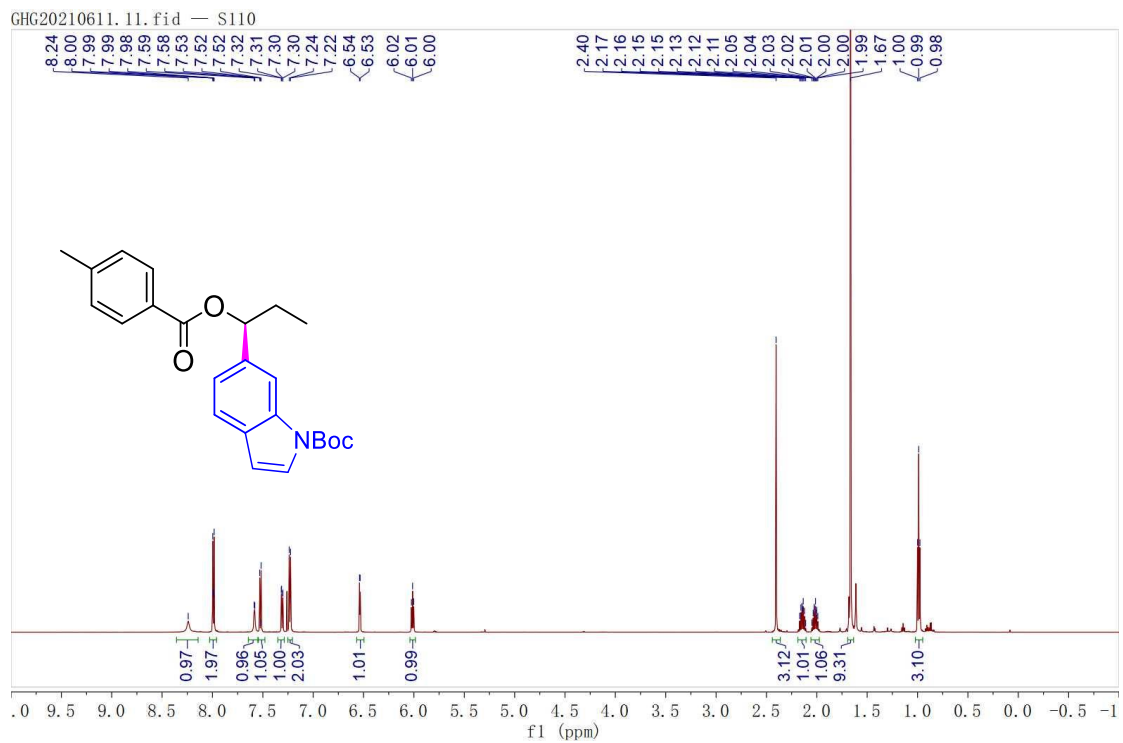



51, <sup>13</sup>C NMR (151 MHz, CDCl<sub>3</sub>)

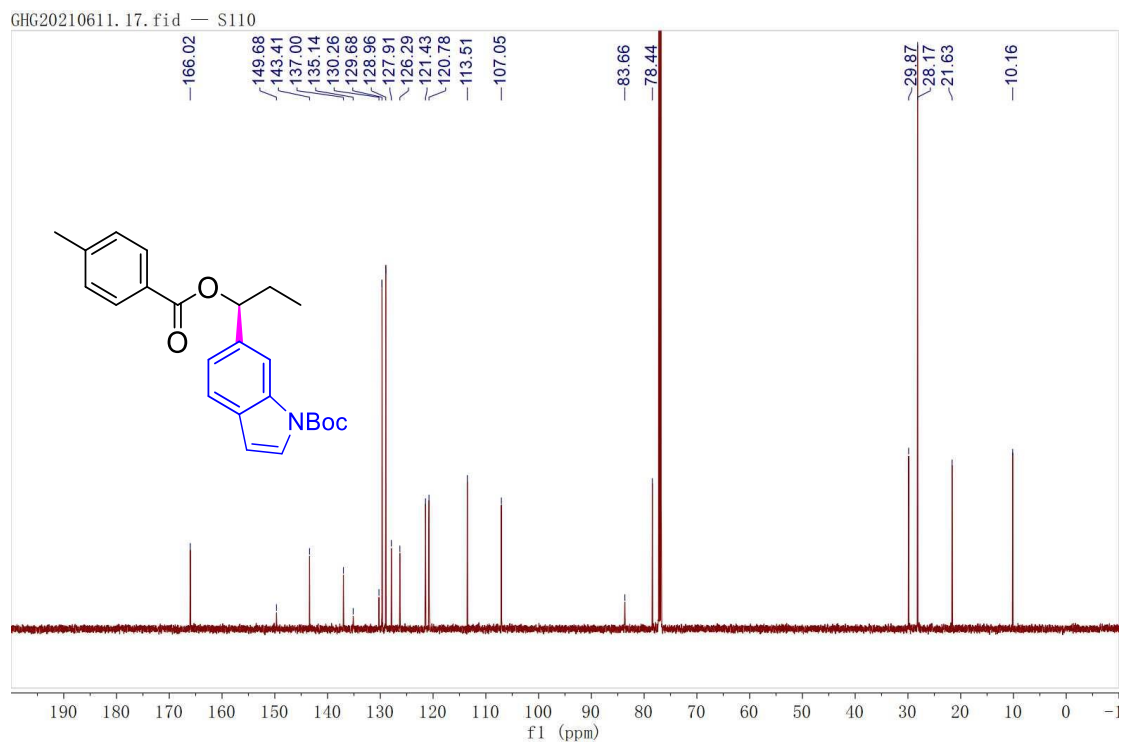

52, <sup>1</sup>H-NMR (600 MHz, CDCl<sub>3</sub>)

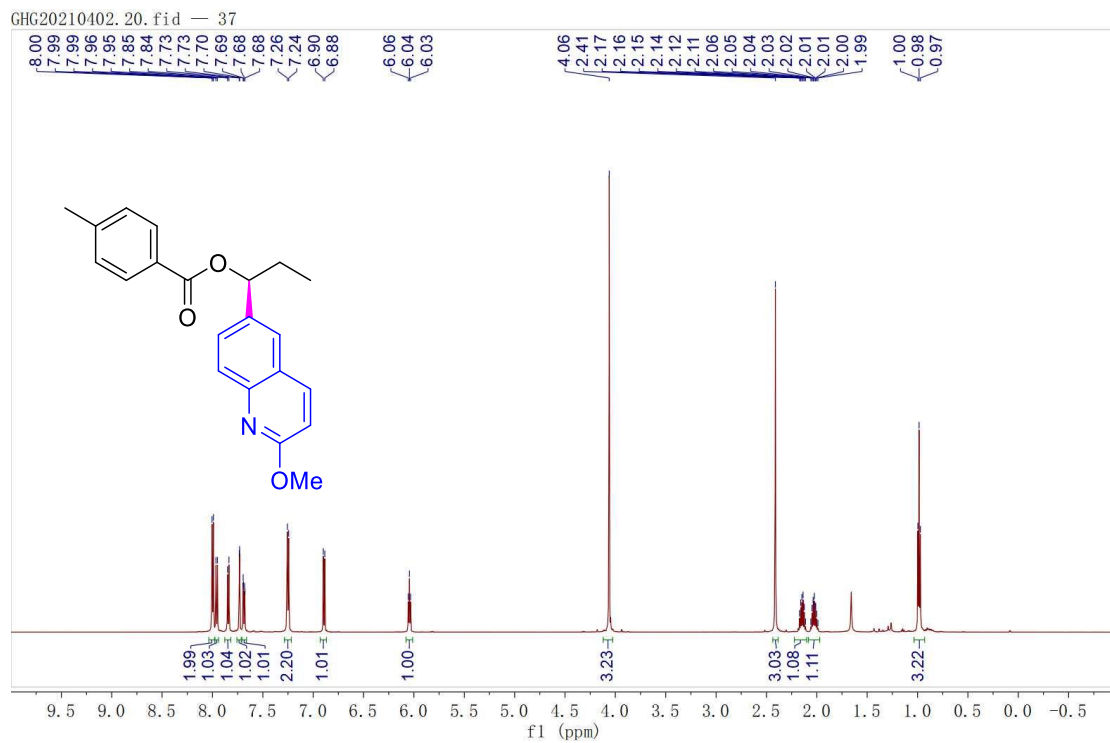

52, <sup>13</sup>C NMR (151 MHz, CDCl<sub>3</sub>)

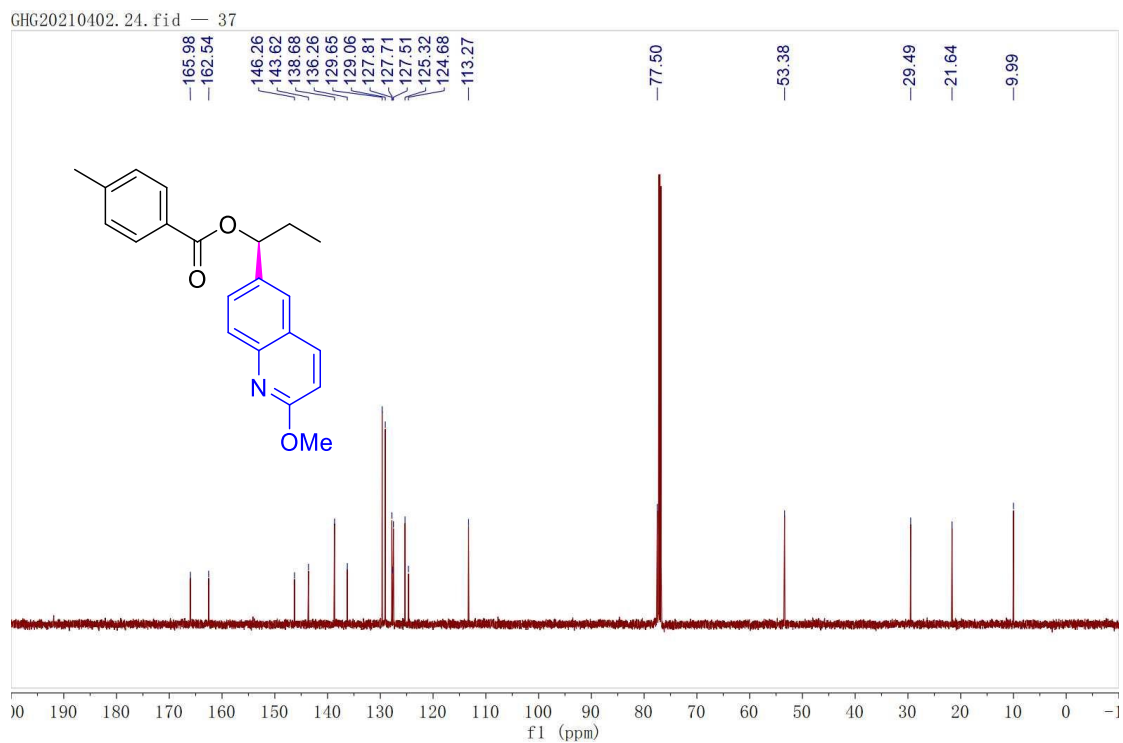

53, <sup>1</sup>H-NMR (600 MHz, CDCl<sub>3</sub>)

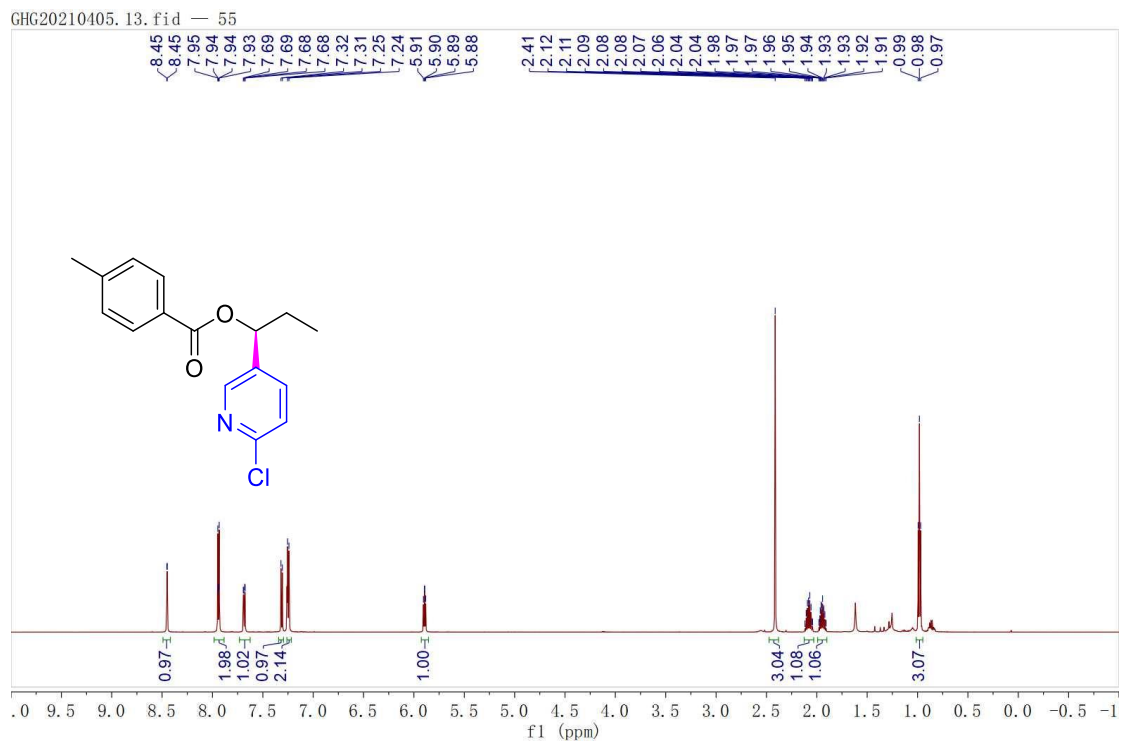

53, <sup>13</sup>C NMR (151 MHz, CDCl<sub>3</sub>)

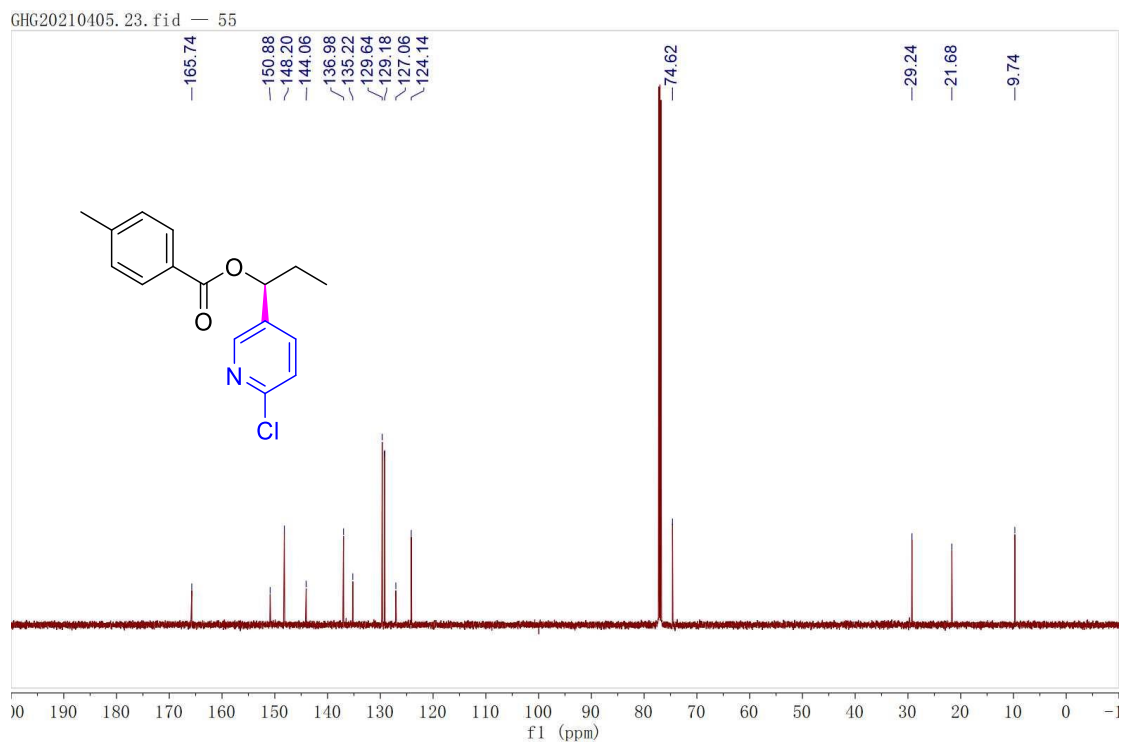

54, <sup>1</sup>H-NMR (600 MHz, CDCl<sub>3</sub>)

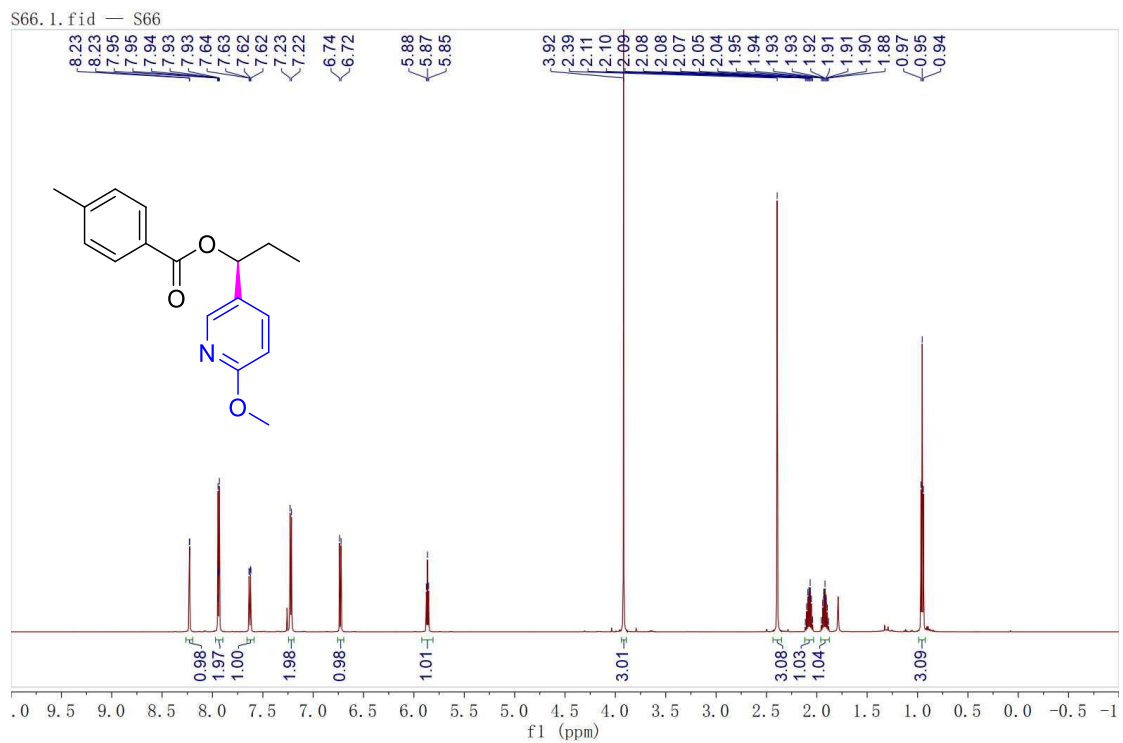

54, <sup>13</sup>C NMR (151 MHz, CDCl<sub>3</sub>)

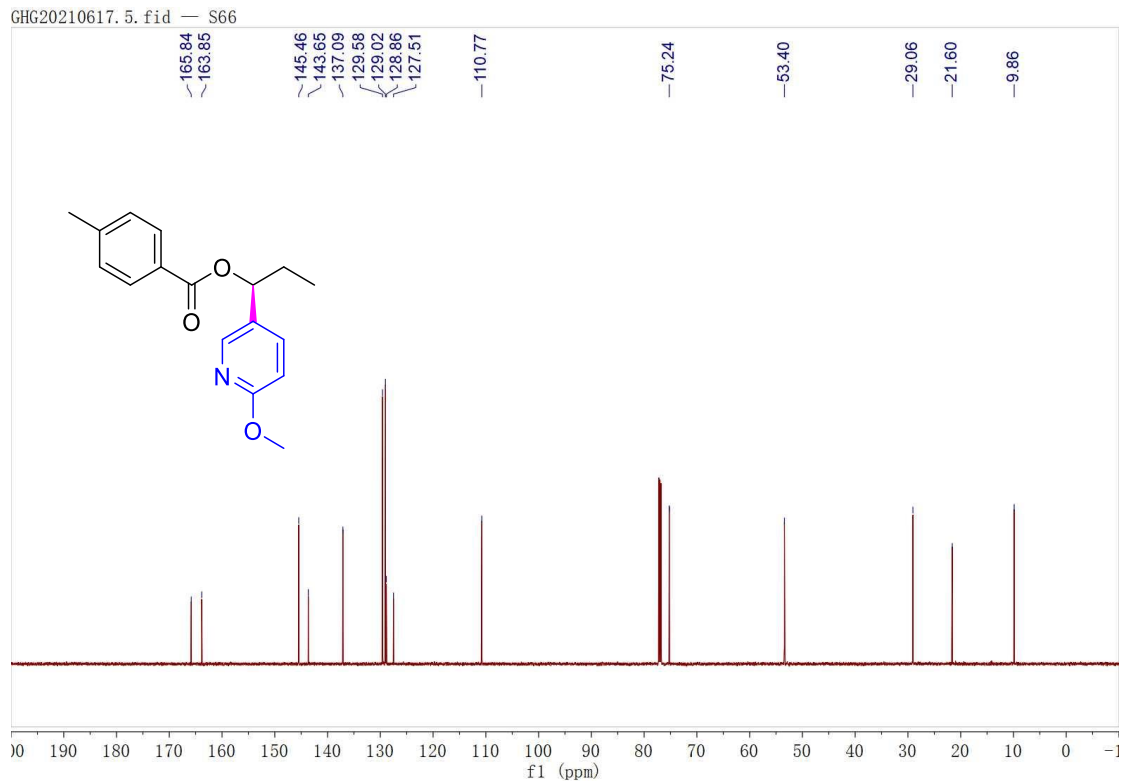

55, <sup>1</sup>H-NMR (600 MHz, CDCl<sub>3</sub>)

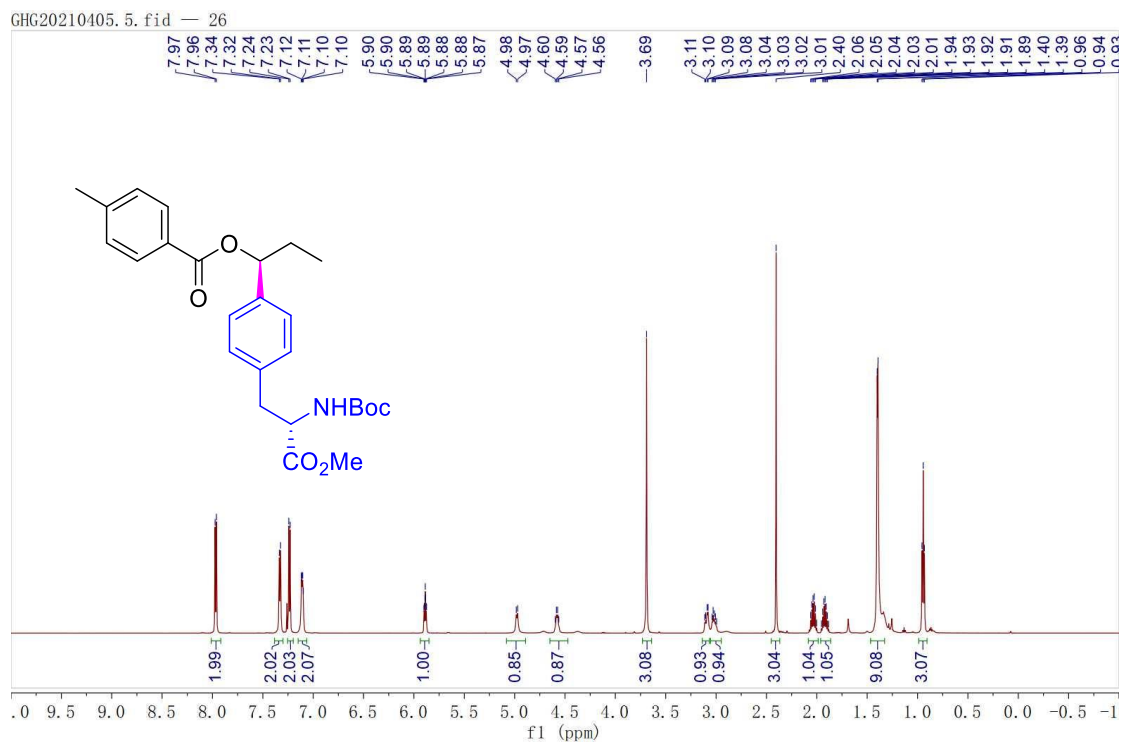

55, <sup>13</sup>C NMR (151 MHz, CDCl<sub>3</sub>)

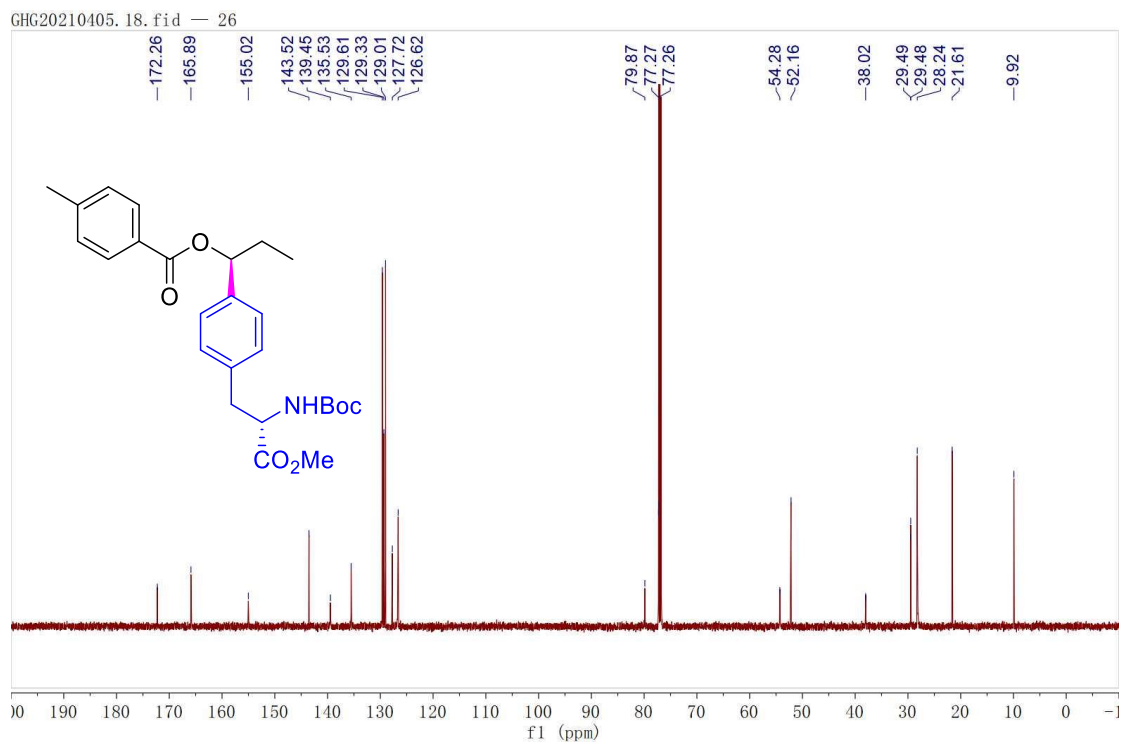

56, <sup>1</sup>H-NMR (600 MHz, CDCl<sub>3</sub>)

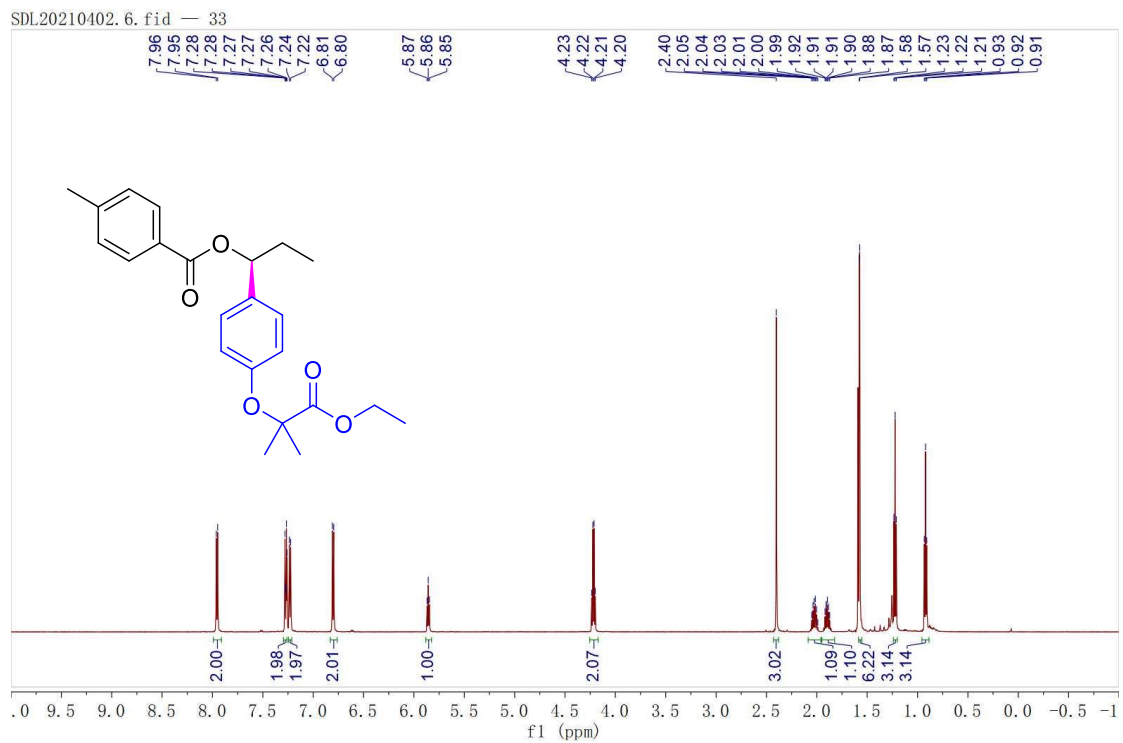

56, <sup>13</sup>C NMR (151 MHz, CDCl<sub>3</sub>)

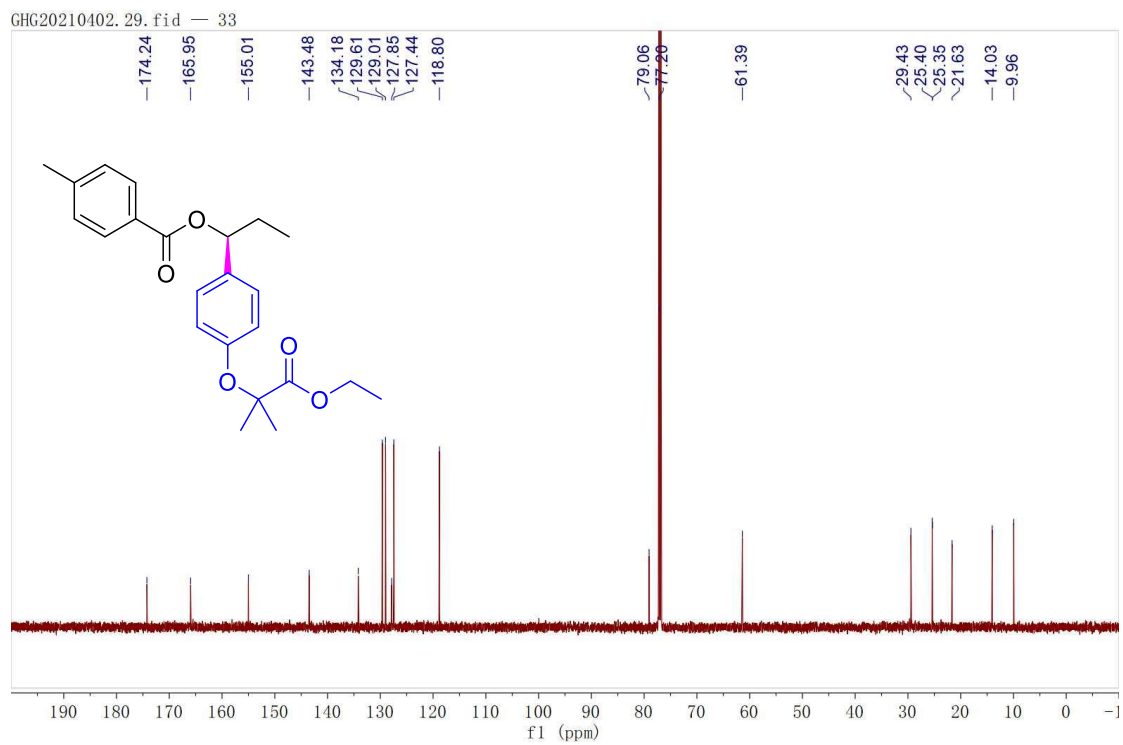

57, <sup>1</sup>H-NMR (600 MHz, CDCl<sub>3</sub>)

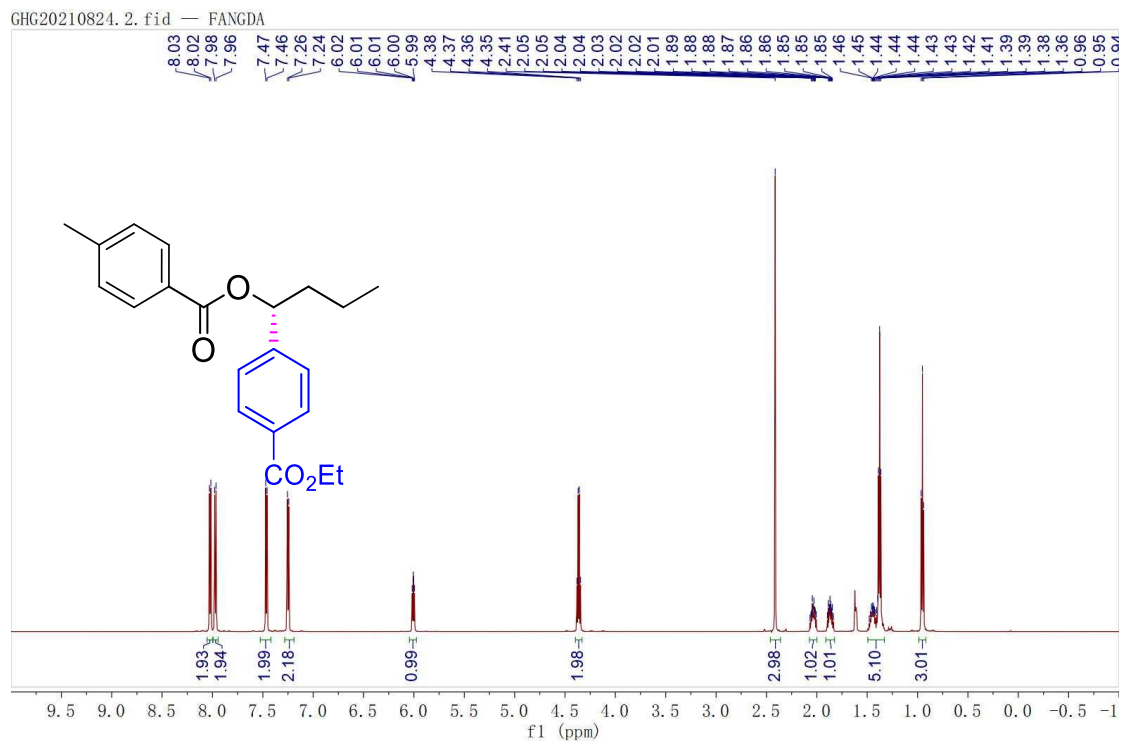

57, <sup>13</sup>C NMR (151 MHz, CDCl<sub>3</sub>)

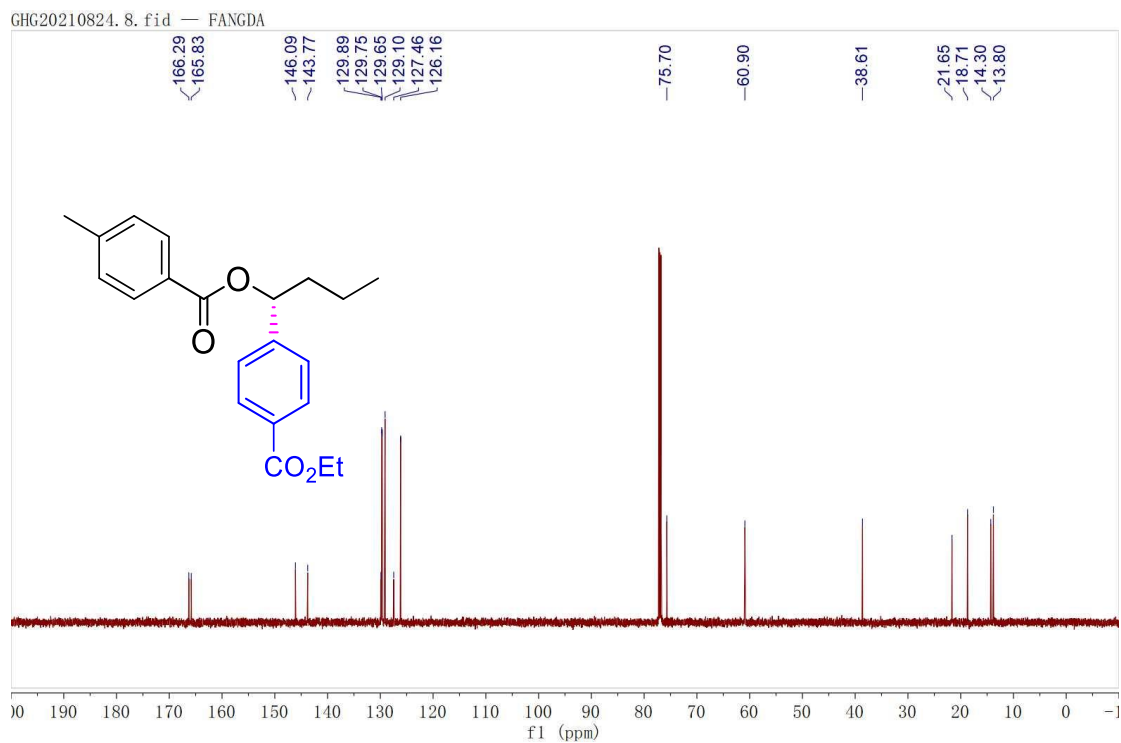

58, <sup>1</sup>H-NMR (600 MHz, CDCl<sub>3</sub>)

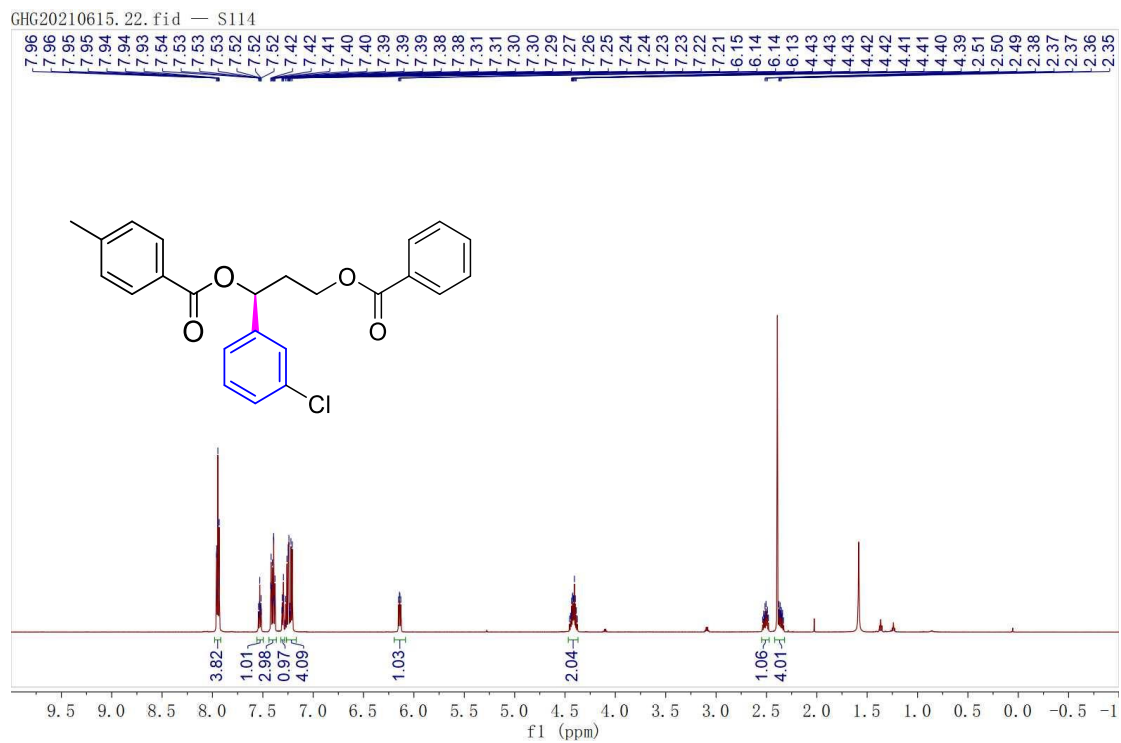

58, <sup>13</sup>C NMR (151 MHz, CDCl<sub>3</sub>)

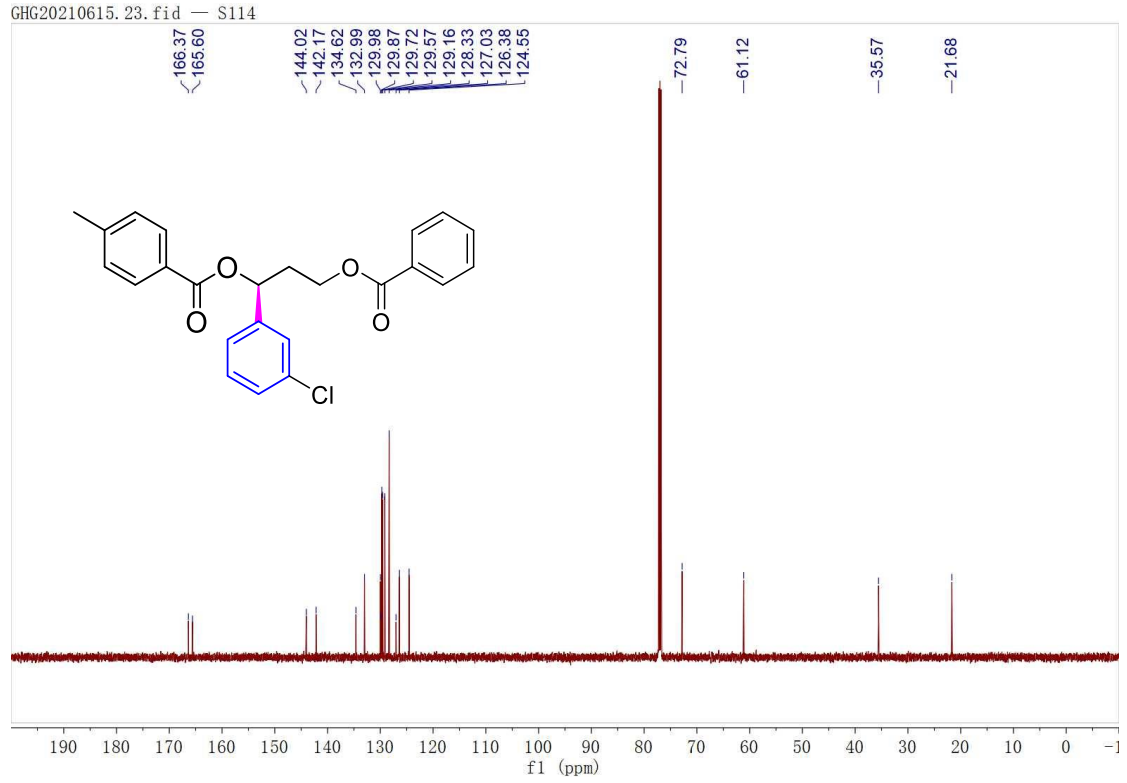

59, <sup>1</sup>H-NMR (600 MHz, CDCl<sub>3</sub>)

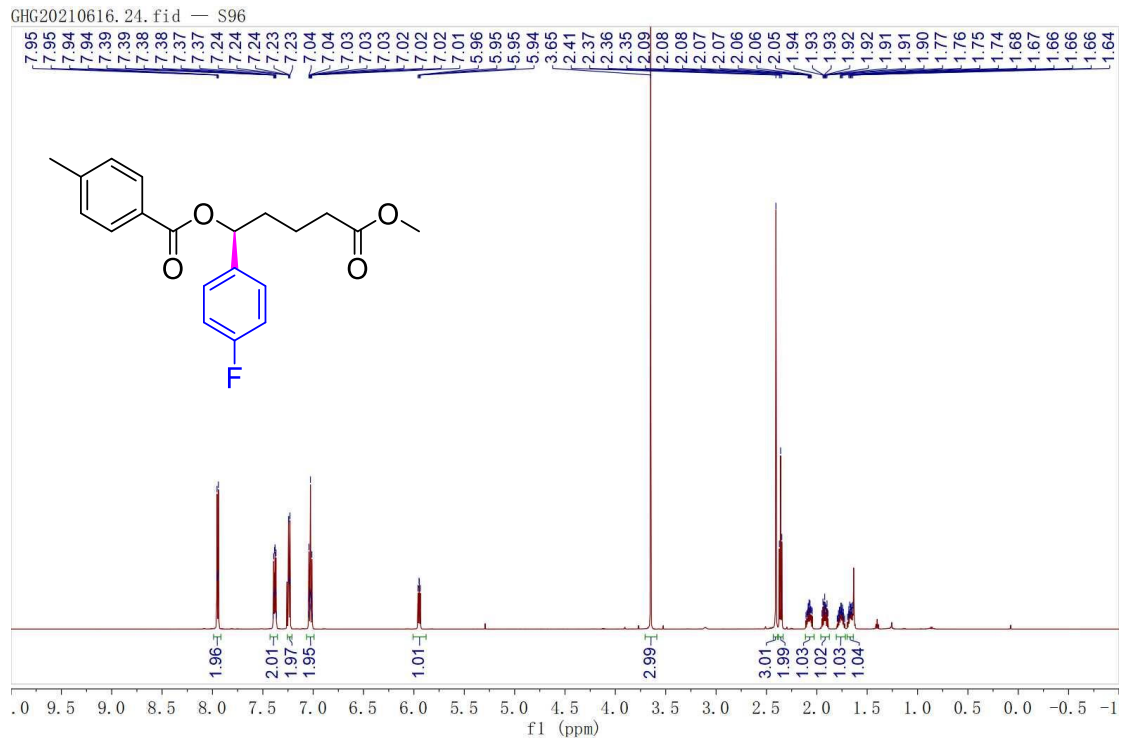



59, <sup>13</sup>C NMR (151 MHz, CDCl<sub>3</sub>)

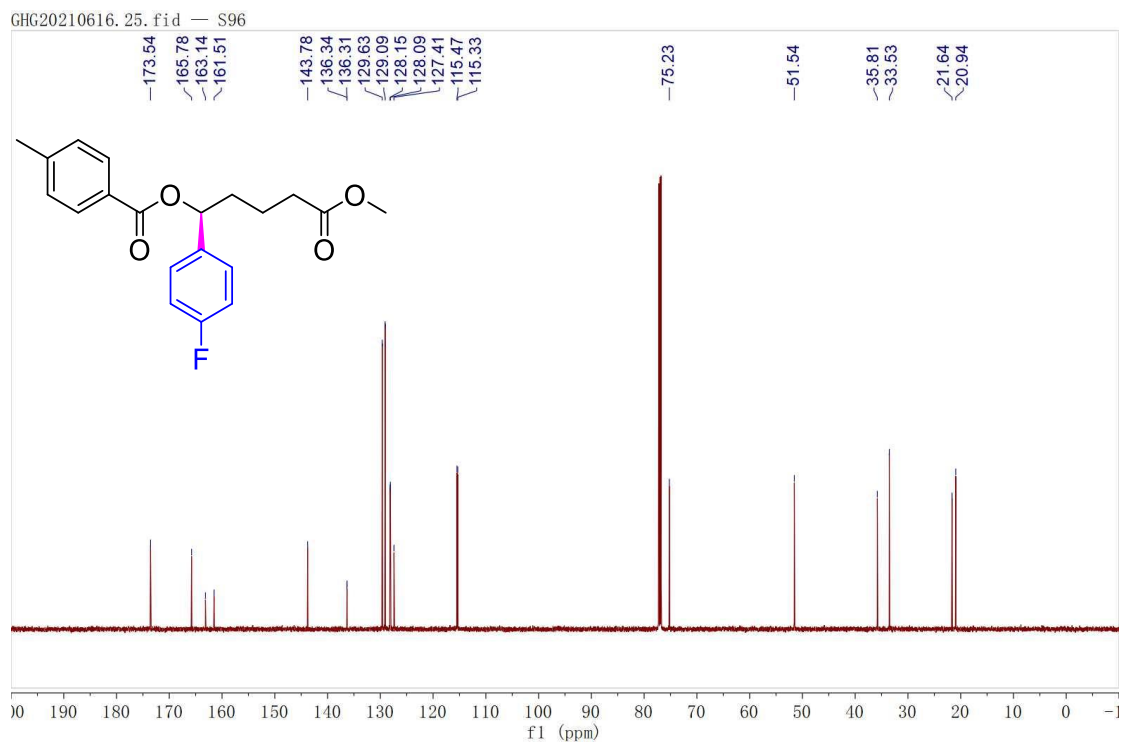

59, <sup>9</sup>F NMR (565 MHz, CDCl<sub>3</sub>)

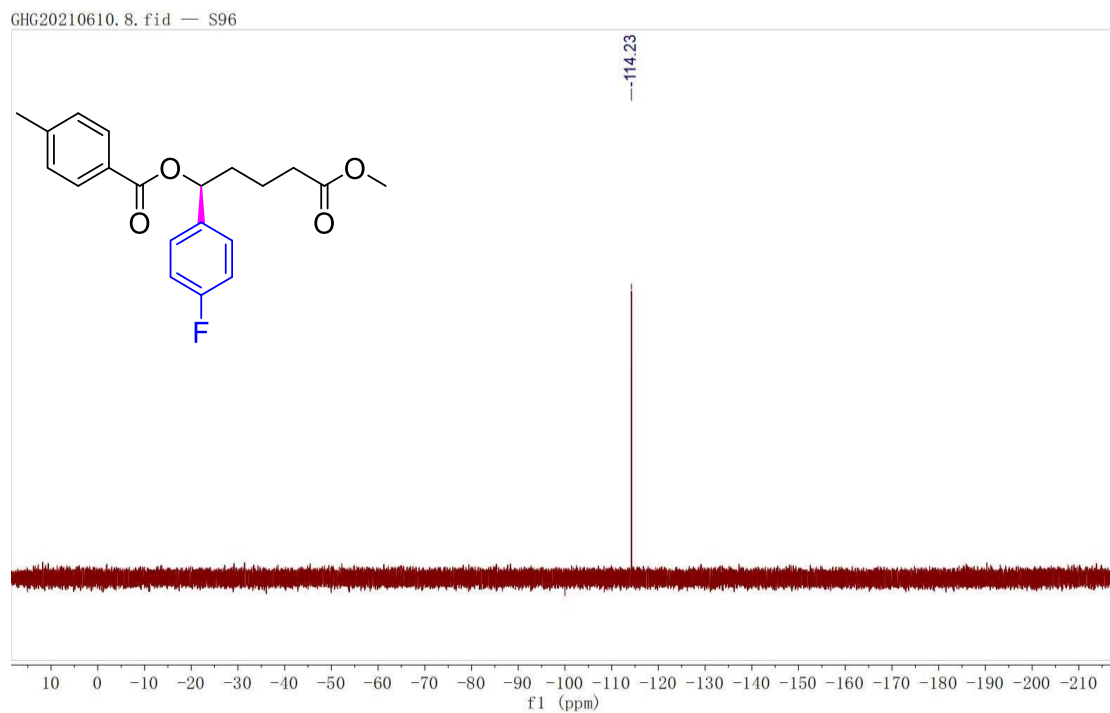

60, <sup>1</sup>H-NMR (600 MHz, CDCl<sub>3</sub>)

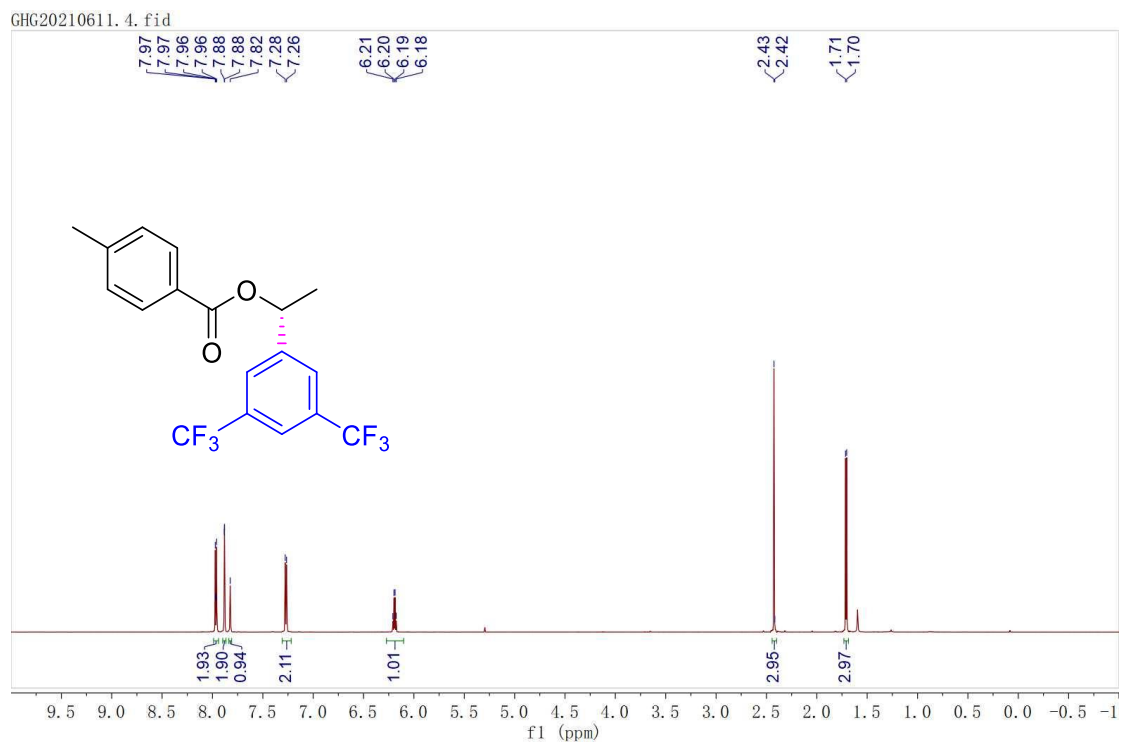

60, <sup>13</sup>C NMR (151 MHz, CDCl<sub>3</sub>)

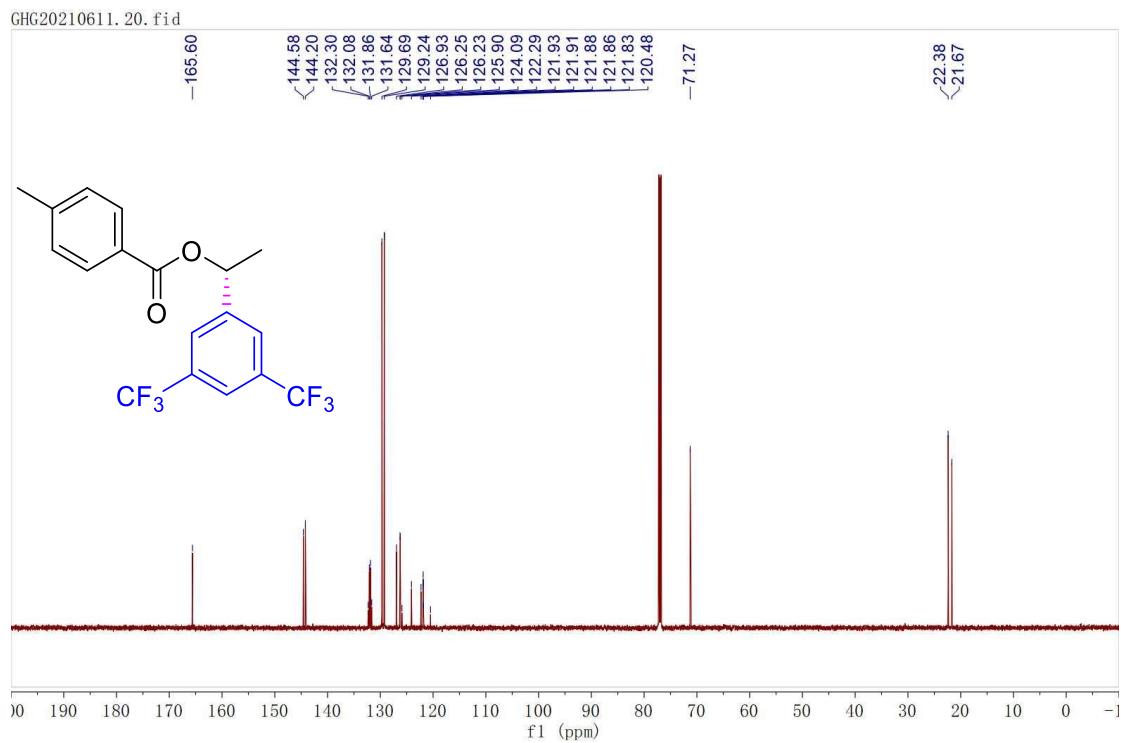

**60, <sup>9</sup>F NMR (565 MHz, CDCl<sub>3</sub>)**

GHG20210610.6.fid — 95

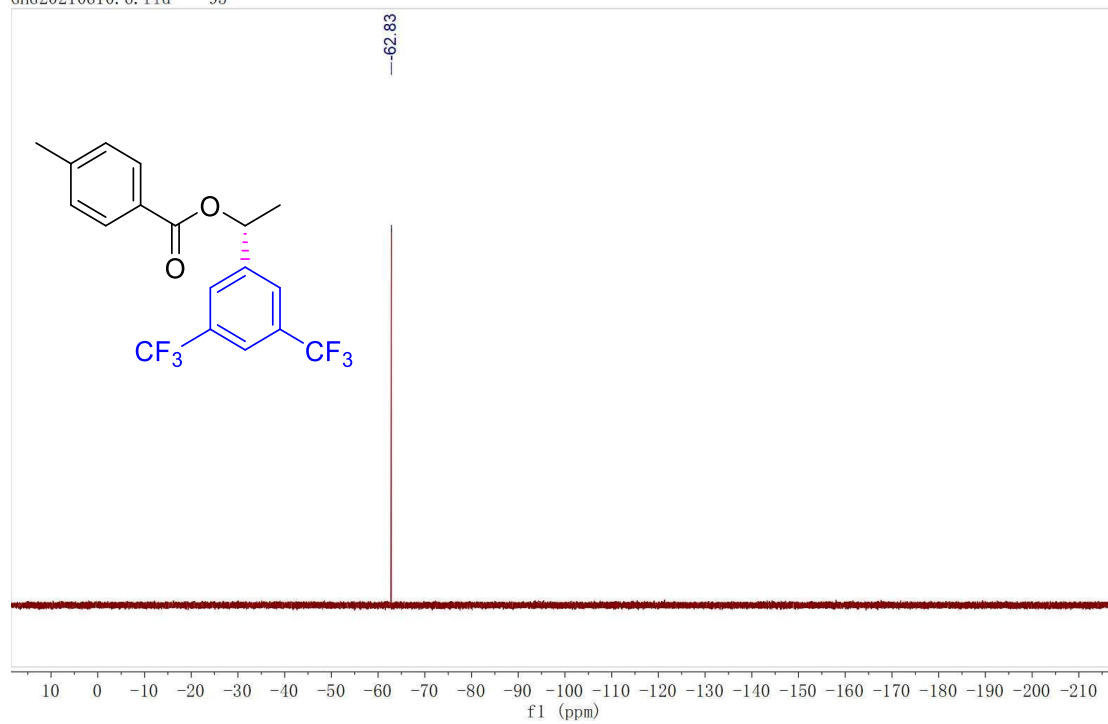

**61, <sup>1</sup>H-NMR (600 MHz, CDCl<sub>3</sub>)**

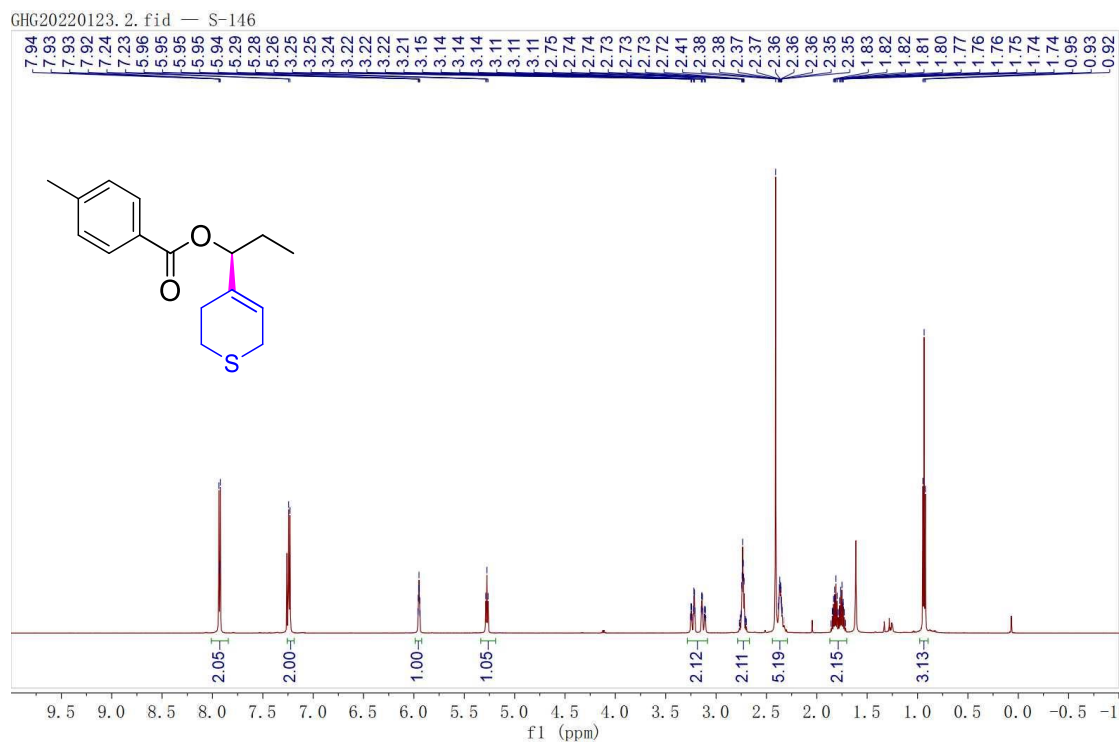

61,  $^{13}\text{C}$  NMR (151 MHz,  $\text{CDCl}_3$ )

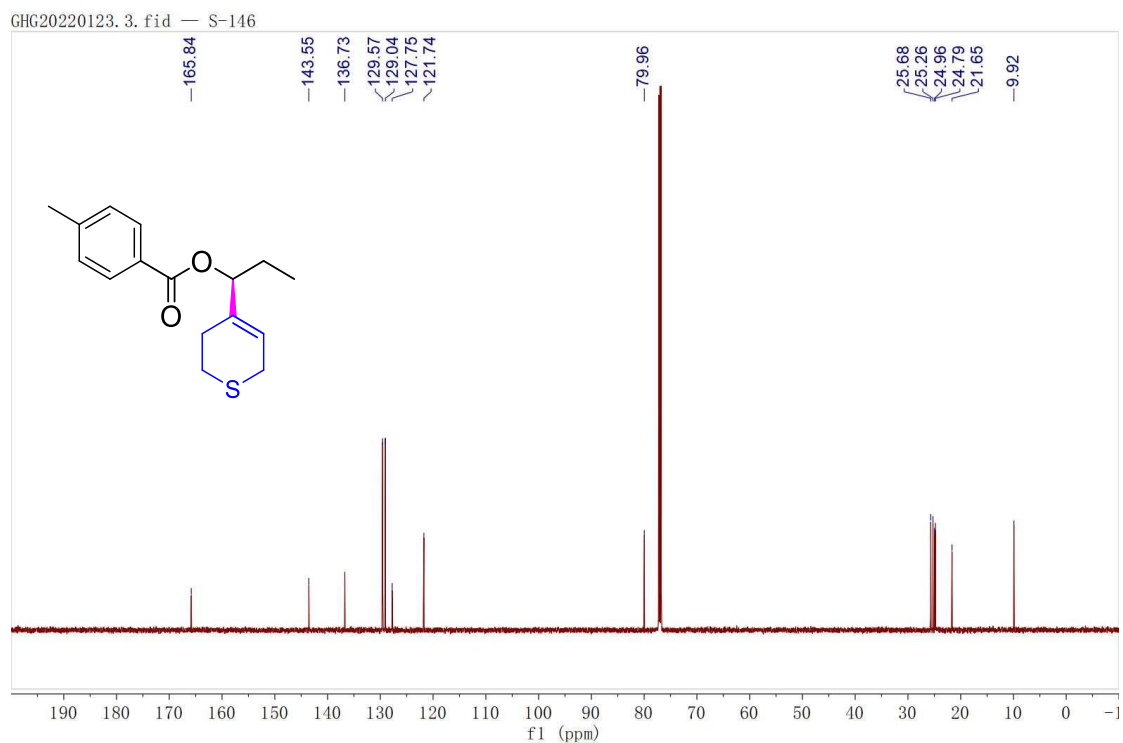

62,  $^1\text{H}$ -NMR (600 MHz,  $\text{CDCl}_3$ )

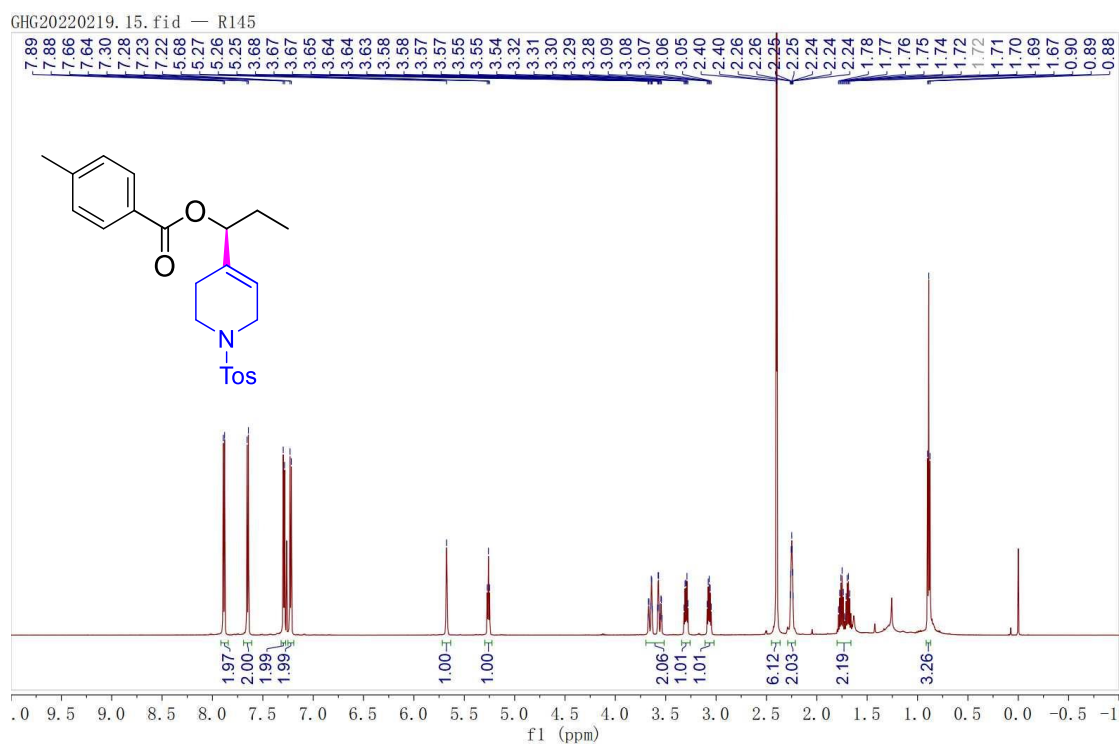

62, <sup>13</sup>C NMR (151 MHz, CDCl<sub>3</sub>)

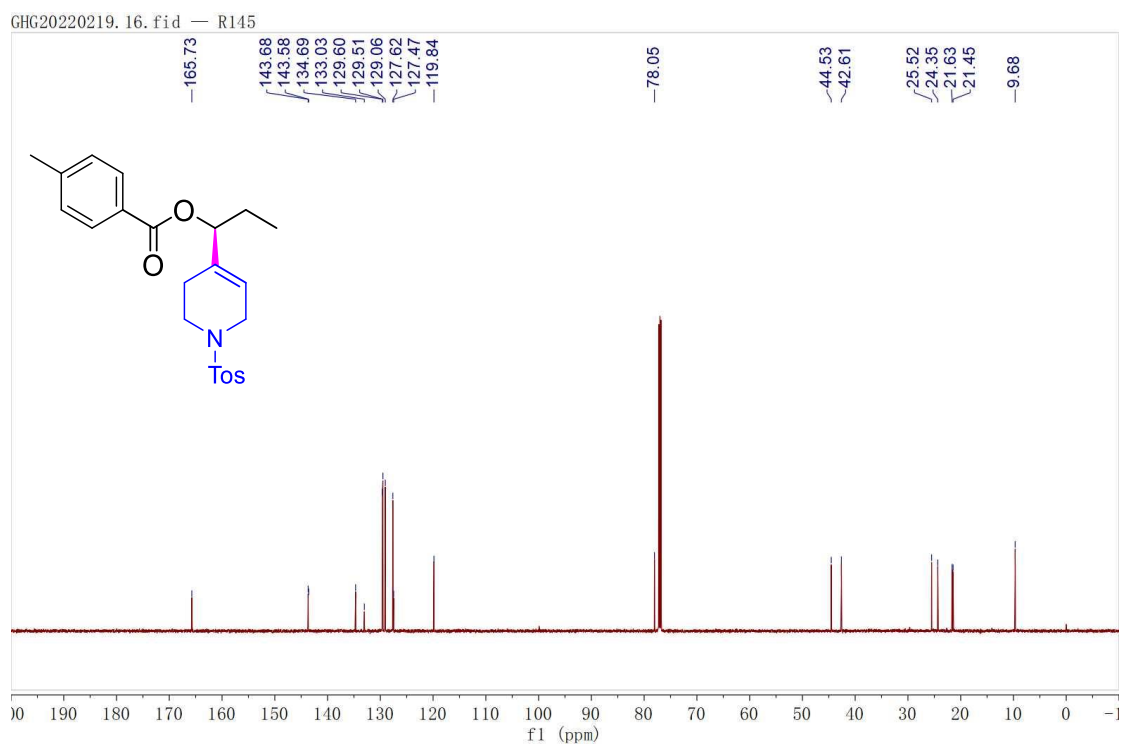

63, <sup>1</sup>H-NMR (600 MHz, CDCl<sub>3</sub>)

GHG20220219.19.fid - S156

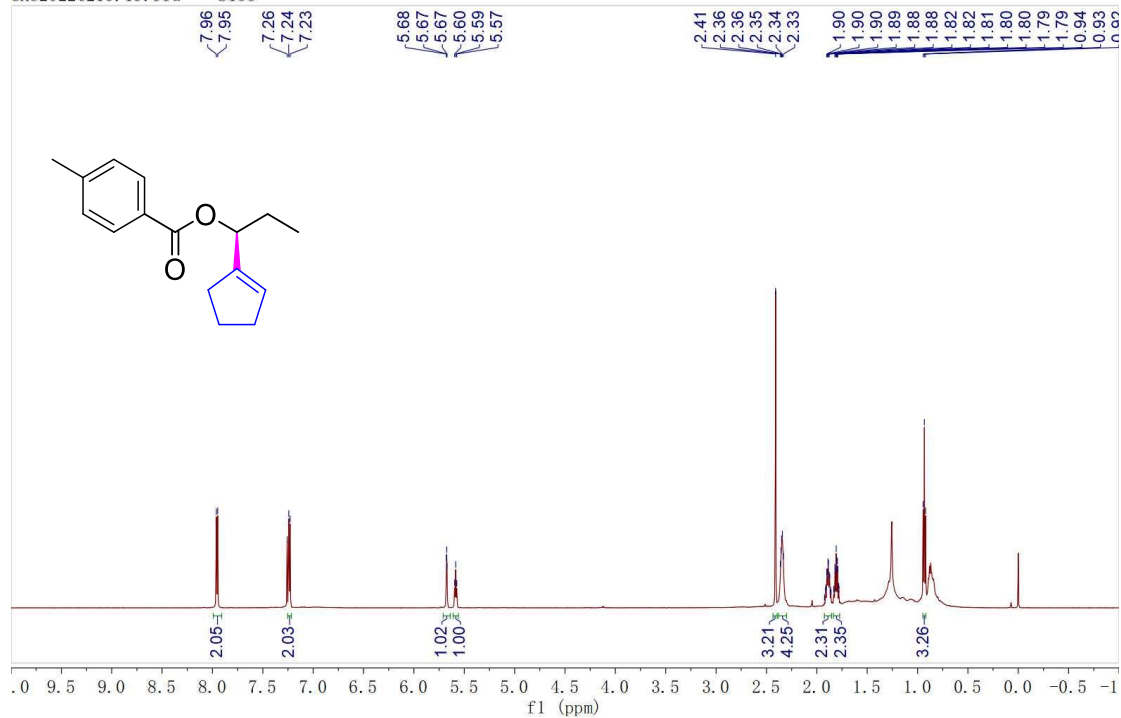

**63, <sup>13</sup>C NMR (151 MHz, CDCl<sub>3</sub>)**

GHG20220219.20.fid - S156

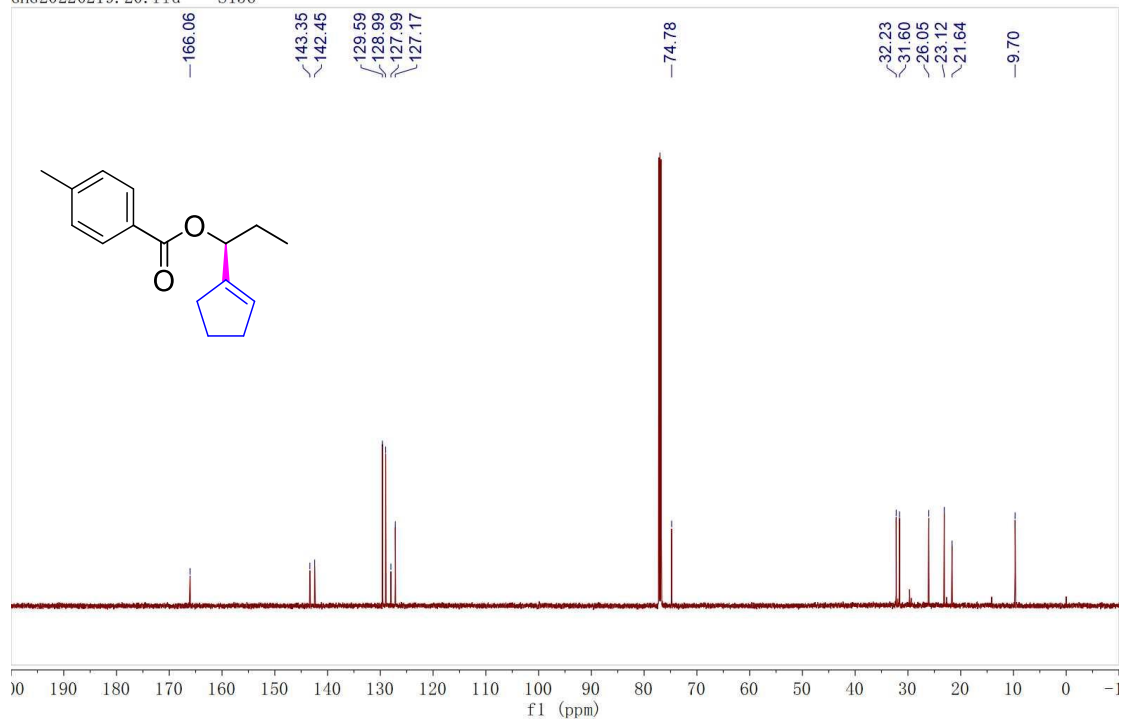

**64, <sup>1</sup>H-NMR (600 MHz, CDCl<sub>3</sub>)**

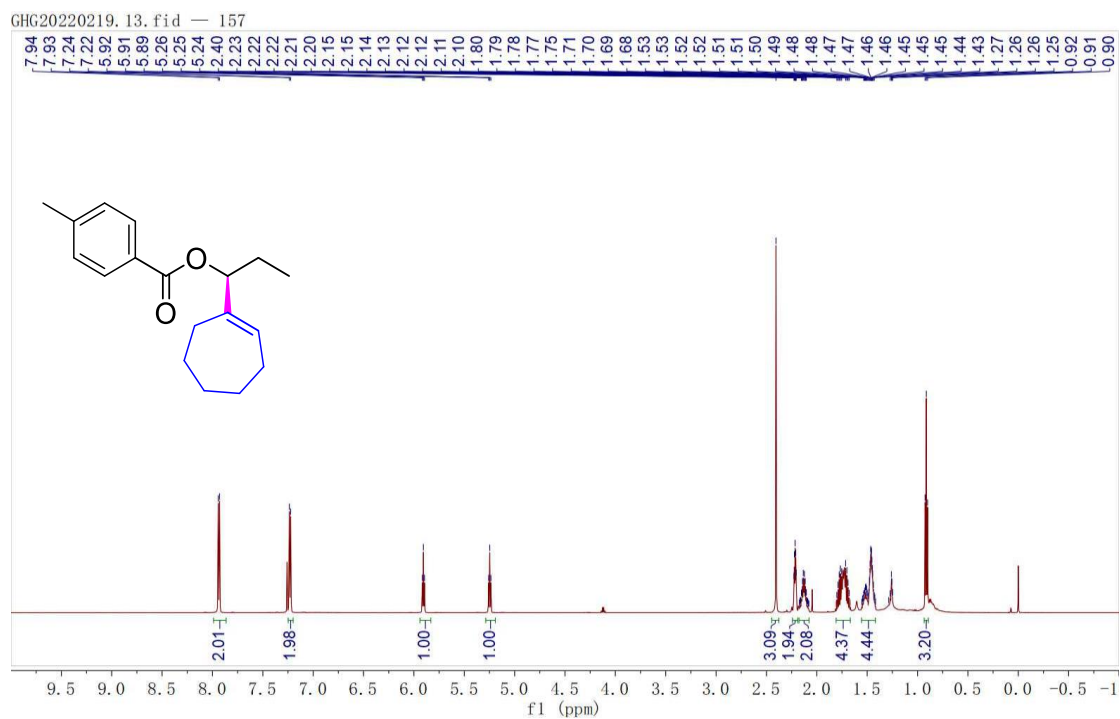

64, <sup>13</sup>C NMR (151 MHz, CDCl<sub>3</sub>)

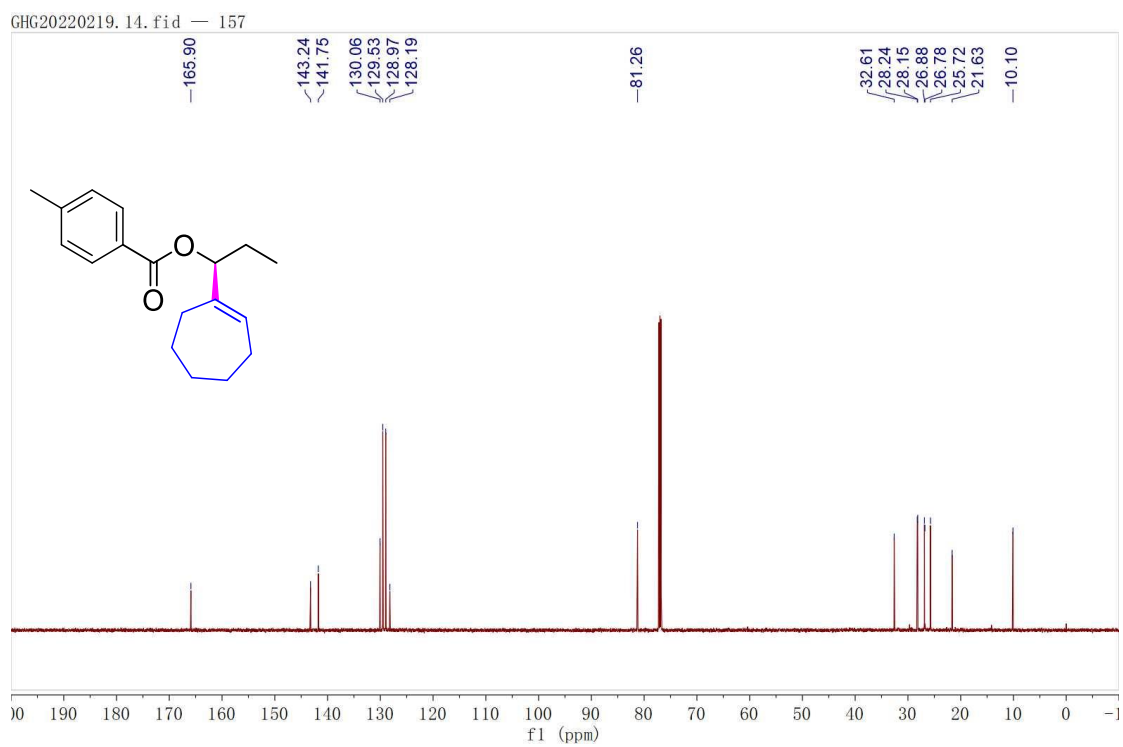

65, <sup>1</sup>H-NMR (600 MHz, CDCl<sub>3</sub>)

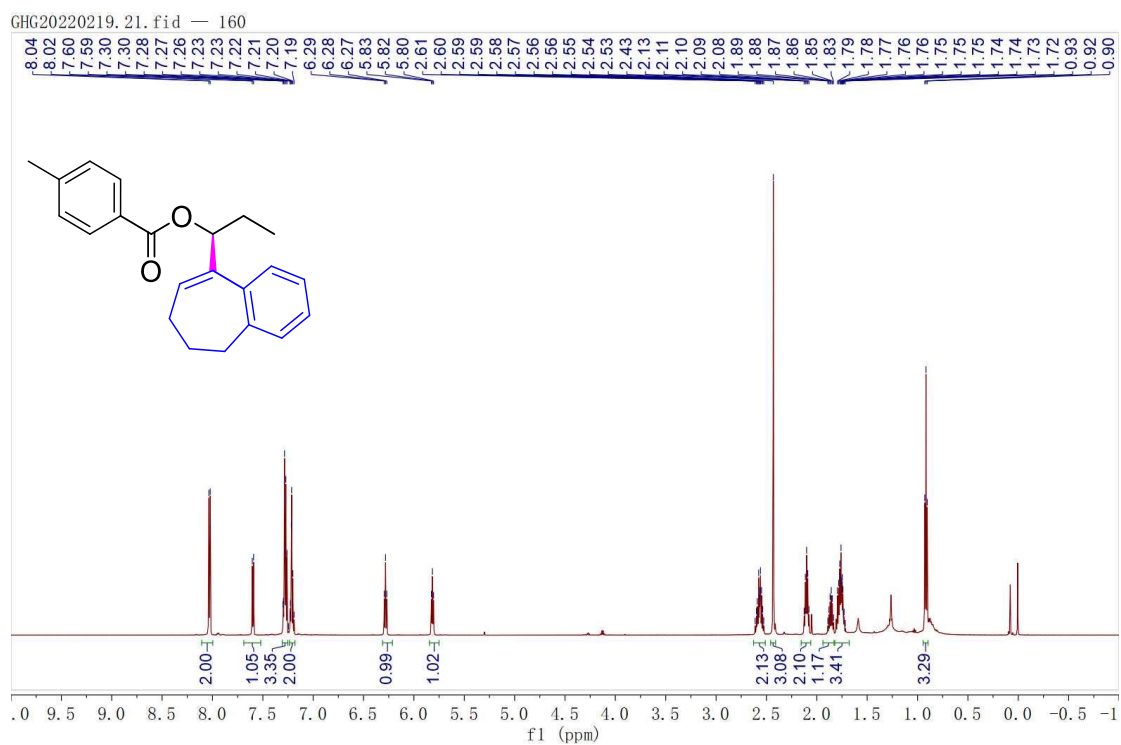

65, <sup>13</sup>C NMR (151 MHz, CDCl<sub>3</sub>)

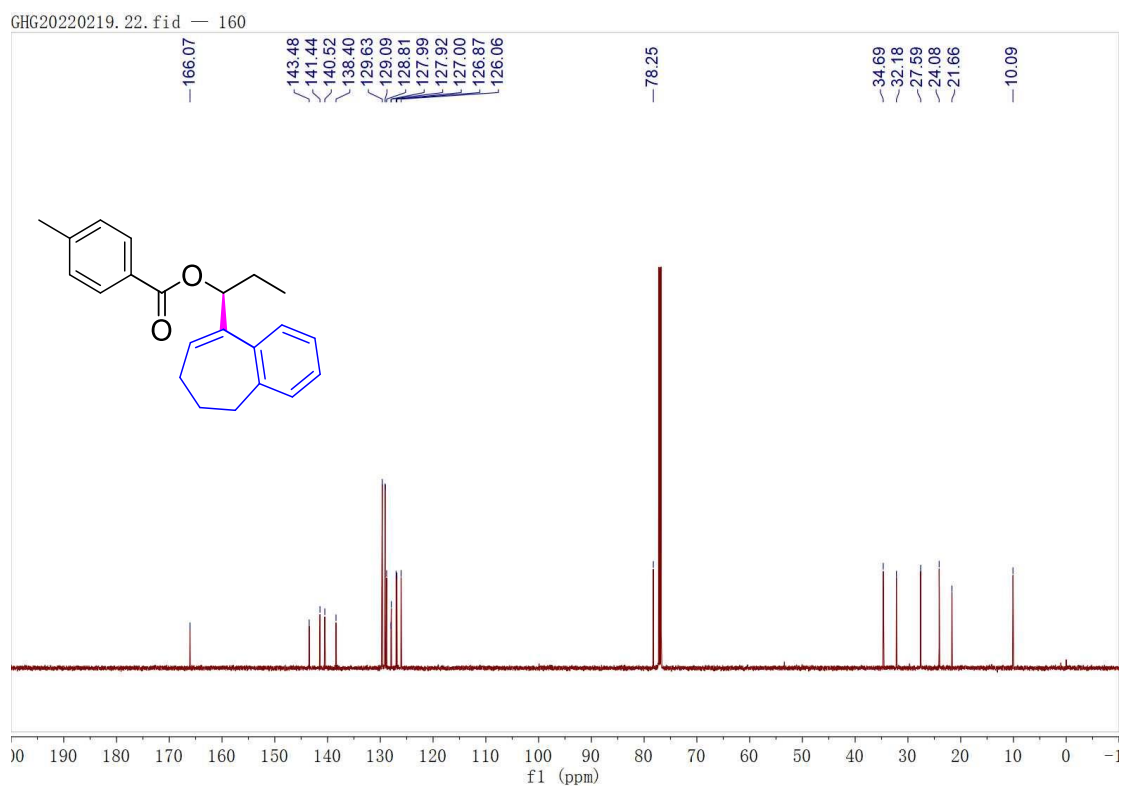



66, <sup>1</sup>H-NMR (600 MHz, CDCl<sub>3</sub>)

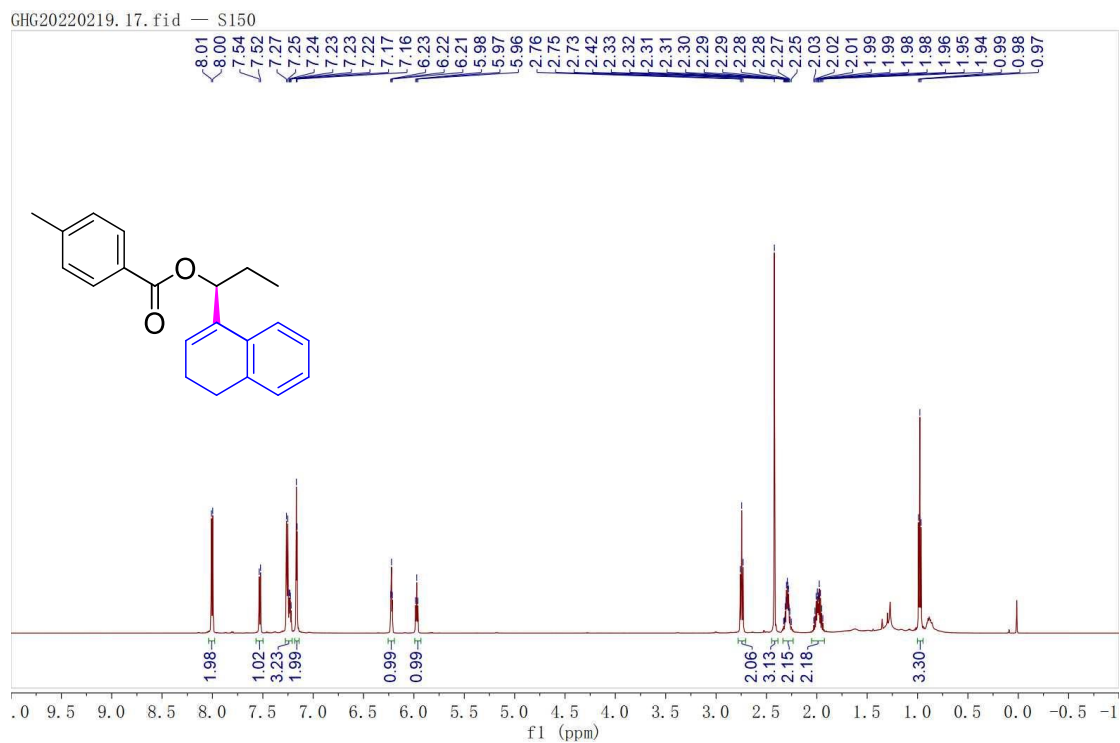

66, <sup>13</sup>C NMR (151 MHz, CDCl<sub>3</sub>)

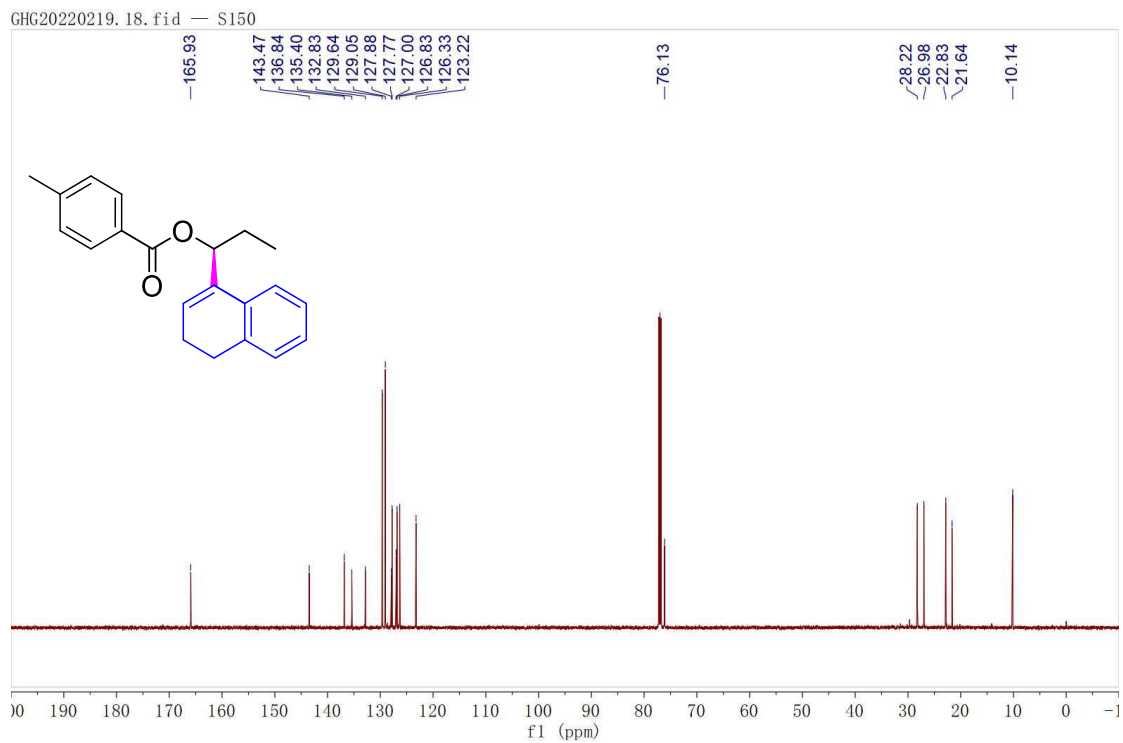

67, <sup>1</sup>H-NMR (600 MHz, CDCl<sub>3</sub>)

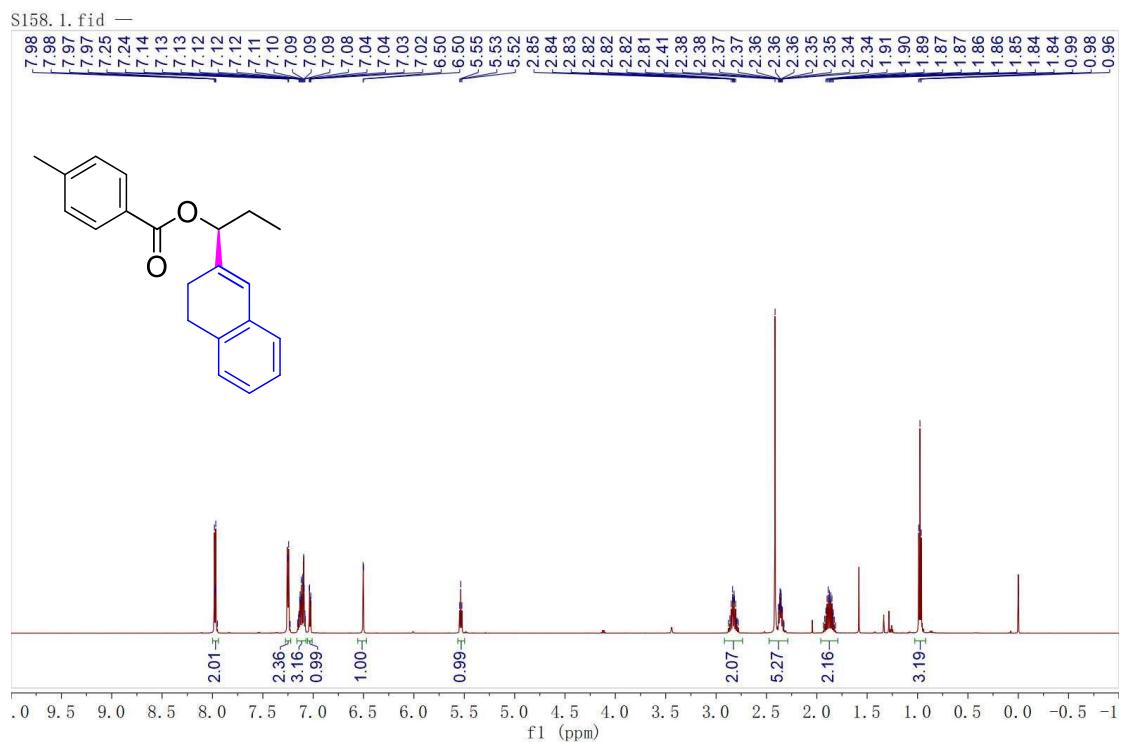

67, <sup>13</sup>C NMR (151 MHz, CDCl<sub>3</sub>)

S158.2.fid —

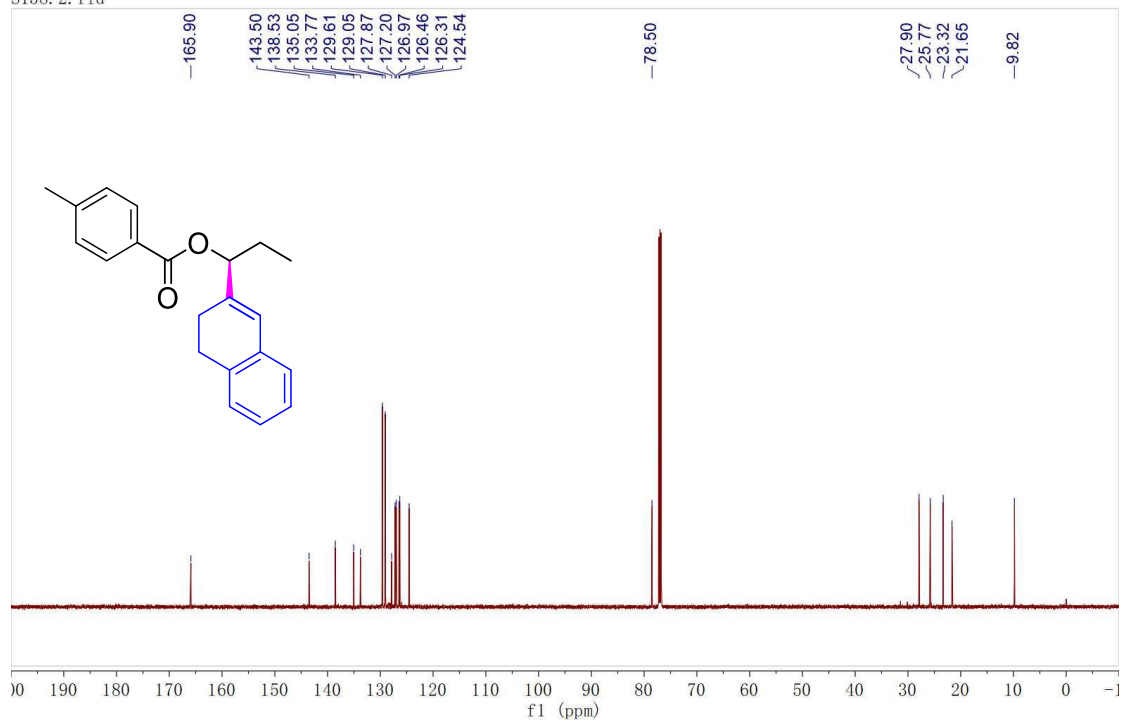

68, <sup>1</sup>H-NMR (600 MHz, CDCl<sub>3</sub>)

GHG20220219.7.fid — S159

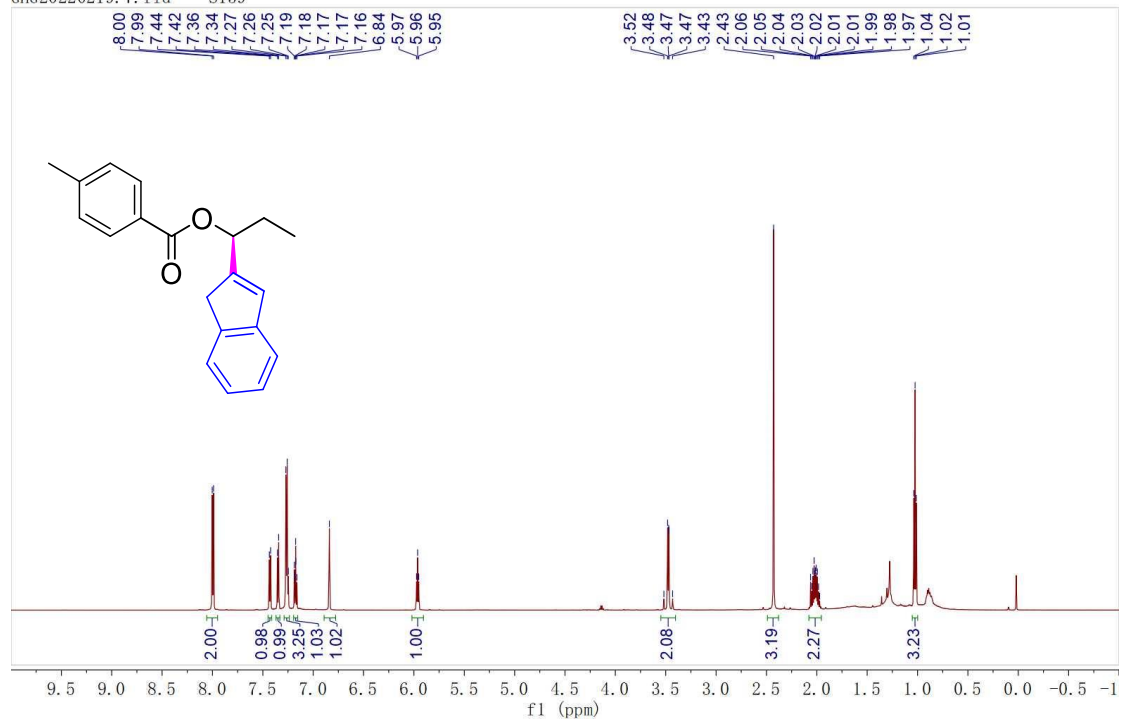

68, <sup>13</sup>C NMR (151 MHz, CDCl<sub>3</sub>)

GHG20220219. 8. fid — S159

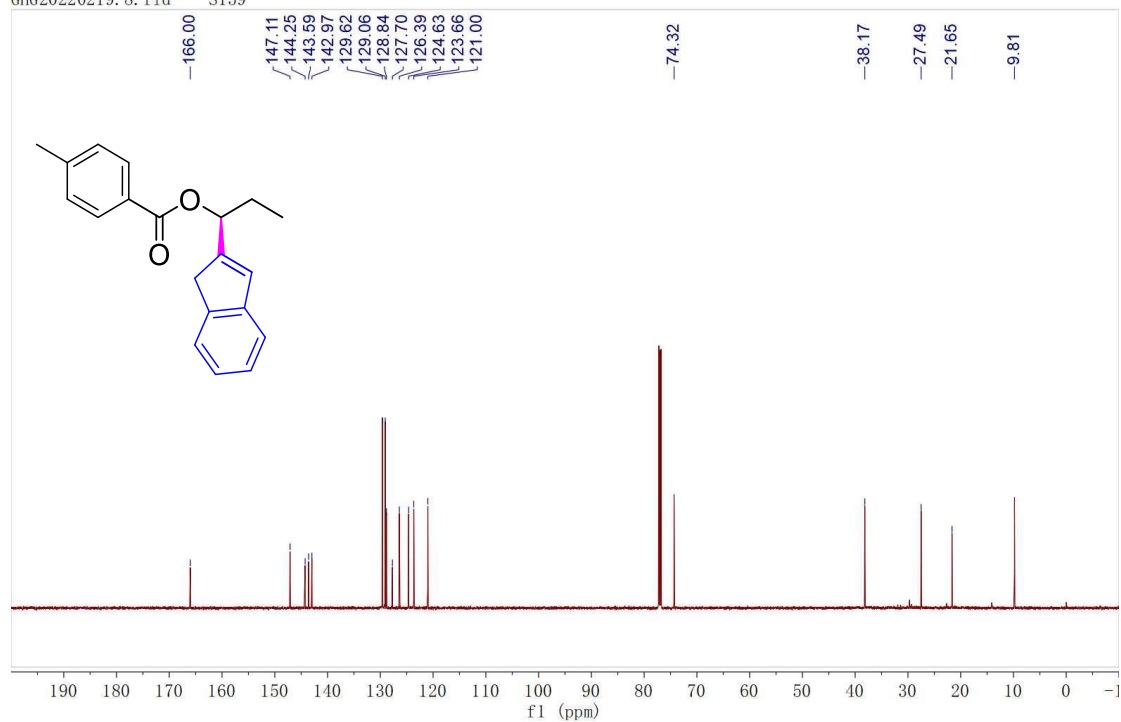

70, <sup>1</sup>H-NMR (600 MHz, CDCl<sub>3</sub>)

GHG20210824. 1. fid — JILI

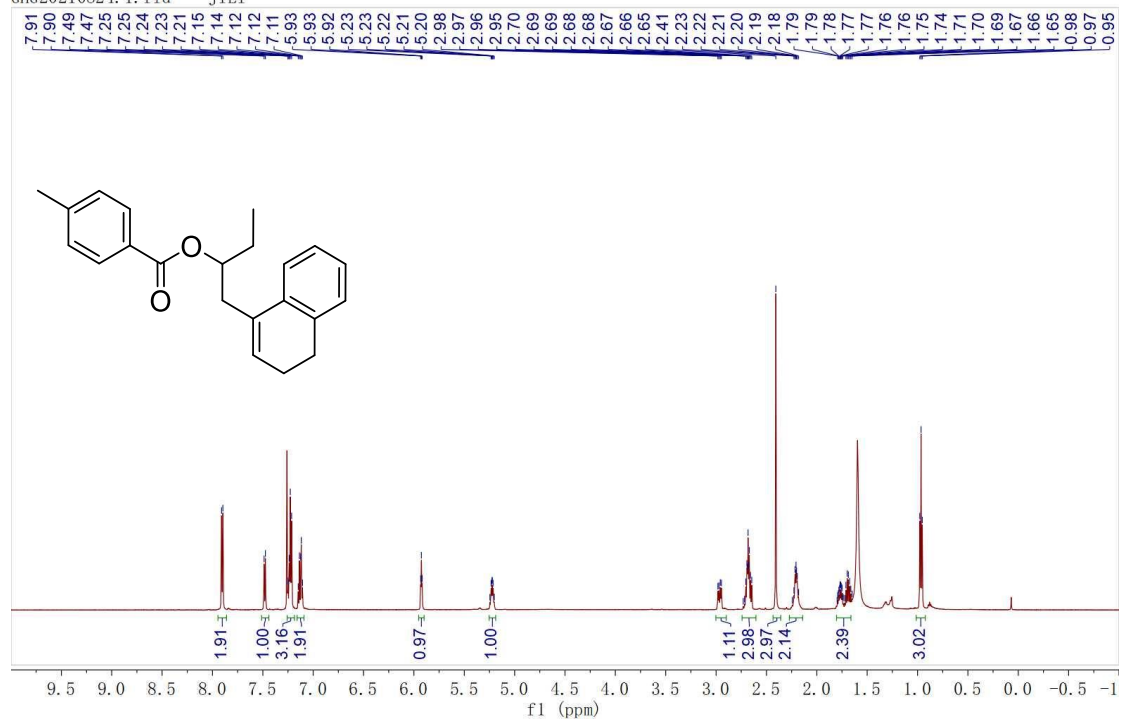

70 <sup>13</sup>C NMR (151 MHz, CDCl<sub>3</sub>)

GHG20210824.7.fid - JILI

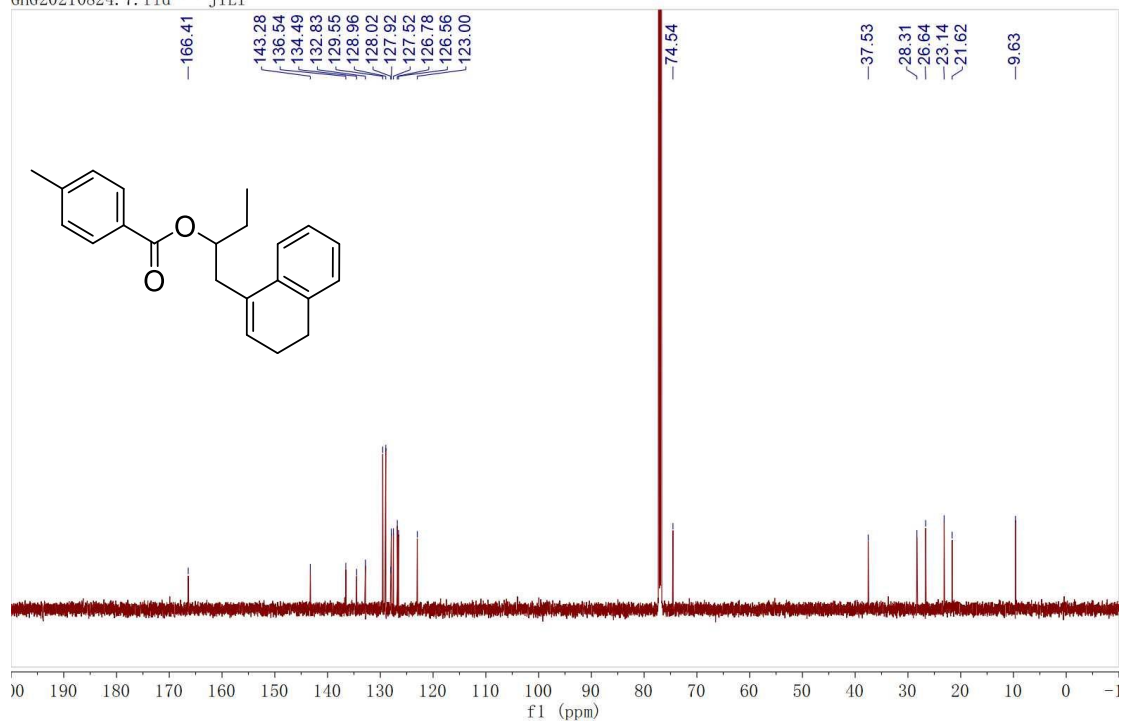

Supplement: d2sc02806a1.pdf [file d2sc02806a1.pdf]
